# Supplementary material for: Structural, Kinetic and Proteomic Characterization of Acetyl Phosphate-Dependent Bacterial Protein Acetylation
Source: PLoS One. 2014 Apr 22;9(4):e94816. doi: 10.1371/journal.pone.0094816 (PMC3995681; doi:10.1371/journal.pone.0094816)
Supplement: Table S12 — Quantitative MS1 Filtering identified statistically significant increased acetylation of lysines sites in mutants relative to WT: list of 51 proteins that correspond to the 69 sites that were significantly regulated in the cobB mutant relative to WT. (XLSX) [file pone.0094816.s022.xlsx]

## Sheet: S12_proteins_CobB
Table S12. List of 51 proteins that correspond to the 69 acetyl sites that are significantly upregulated in the cobB mutant than WT
Protein Name	Protein Description	Gene Name
sp|P0ABD9|BCCP_ECOL6	Biotin carboxyl carrier protein of acetyl-CoA carboxylase OS=Escherichia coli O6:H1 (strain CFT073 / ATCC 700928 / UPEC) GN=accB PE=3 SV=1	accB
sp|P0AFG8|ODP1_ECOLI	Pyruvate dehydrogenase E1 component OS=Escherichia coli (strain K12) GN=aceE PE=1 SV=2	aceE
sp|P06959|ODP2_ECOLI	Dihydrolipoyllysine-residue acetyltransferase component of pyruvate dehydrogenase complex OS=Escherichia coli (strain K12) GN=aceF PE=1 SV=3	aceF
sp|A7ZKJ7|ACP_ECO24	Acyl carrier protein OS=Escherichia coli O139:H28 (strain E24377A / ETEC) GN=acpP PE=3 SV=1	acpP
sp|P0AE54|BCP_ECO57	Putative peroxiredoxin bcp OS=Escherichia coli O157:H7 GN=bcp PE=3 SV=1	bcp
sp|P69784|PTGA_ECOL6	Glucose-specific phosphotransferase enzyme IIA component OS=Escherichia coli O6:H1 (strain CFT073 / ATCC 700928 / UPEC) GN=crr PE=3 SV=2	crr
sp|P0A9Y8|CSPC_ECO57	Cold shock-like protein CspC OS=Escherichia coli O157:H7 GN=cspC PE=3 SV=2	cspC
sp|P0A973|CSPE_ECOL6	Cold shock-like protein CspE OS=Escherichia coli O6:H1 (strain CFT073 / ATCC 700928 / UPEC) GN=cspE PE=3 SV=2	cspE
sp|B7UHB4|CSRA_ECO27	Carbon storage regulator OS=Escherichia coli O127:H6 (strain E2348/69 / EPEC) GN=csrA PE=3 SV=1	csrA
sp|P0ABS6|PRIM_ECO57	DNA primase OS=Escherichia coli O157:H7 GN=dnaG PE=3 SV=1	dnaG
sp|A7ZHA4|DNAK_ECO24	Chaperone protein DnaK OS=Escherichia coli O139:H28 (strain E24377A / ETEC) GN=dnaK PE=3 SV=1	dnaK
sp|A7ZHR2|RRF_ECO24	Ribosome-recycling factor OS=Escherichia coli O139:H28 (strain E24377A / ETEC) GN=frr PE=3 SV=1	frr
sp|P58228|DCEA_ECO57	Glutamate decarboxylase alpha OS=Escherichia coli O157:H7 GN=gadA PE=3 SV=1	gadA
sp|P0AC92|GNSA_ECOLI	Protein gnsA OS=Escherichia coli (strain K12) GN=gnsA PE=3 SV=1	gnsA
sp|B7ULM8|GPMA_ECO27	2,3-bisphosphoglycerate-dependent phosphoglycerate mutase OS=Escherichia coli O127:H6 (strain E2348/69 / EPEC) GN=gpmA PE=3 SV=1	gpmA
sp|P0A6W7|GREA_ECO57	Transcription elongation factor GreA OS=Escherichia coli O157:H7 GN=greA PE=3 SV=1	greA
sp|A7ZV11|CH10_ECO24	10 kDa chaperonin OS=Escherichia coli O139:H28 (strain E24377A / ETEC) GN=groS PE=3 SV=1	groS
sp|P0ADG7|IMDH_ECOLI	Inosine-5'-monophosphate dehydrogenase OS=Escherichia coli (strain K12) GN=guaB PE=1 SV=1	guaB
sp|P0ACF9|HNS_ECOL6	DNA-binding protein H-NS OS=Escherichia coli O6:H1 (strain CFT073 / ATCC 700928 / UPEC) GN=hns PE=3 SV=2	hns
sp|P0ACF2|DBHA_ECO57	DNA-binding protein HU-alpha OS=Escherichia coli O157:H7 GN=hupA PE=3 SV=1	hupA
sp|P0ACF6|DBHB_ECO57	DNA-binding protein HU-beta OS=Escherichia coli O157:H7 GN=hupB PE=3 SV=1	hupB
sp|A7ZJV1|IF1_ECO24	Translation initiation factor IF-1 OS=Escherichia coli O139:H28 (strain E24377A / ETEC) GN=infA PE=3 SV=1	infA
sp|A7ZS65|IF2_ECO24	Translation initiation factor IF-2 OS=Escherichia coli O139:H28 (strain E24377A / ETEC) GN=infB PE=3 SV=1	infB
sp|B7UHB0|LUXS_ECO27	S-ribosylhomocysteine lyase OS=Escherichia coli O127:H6 (strain E2348/69 / EPEC) GN=luxS PE=3 SV=1	luxS
sp|A7ZMA0|PDXH_ECO24	Pyridoxine/pyridoxamine 5'-phosphate oxidase OS=Escherichia coli O139:H28 (strain E24377A / ETEC) GN=pdxH PE=3 SV=1	pdxH
sp|P0AFJ3|PHNA_ECO57	Protein phnA OS=Escherichia coli O157:H7 GN=phnA PE=4 SV=1	phnA
sp|B7UHJ6|PYRG_ECO27	CTP synthase OS=Escherichia coli O127:H6 (strain E2348/69 / EPEC) GN=pyrG PE=3 SV=1	pyrG
sp|P69409|RCSB_ECO57	Capsular synthesis regulator component B OS=Escherichia coli O157:H7 GN=rcsB PE=3 SV=1	rcsB
sp|P0A946|RIMI_ECO57	Ribosomal-protein-alanine acetyltransferase OS=Escherichia coli O157:H7 GN=rimI PE=3 SV=1	rimI
sp|A7ZUJ6|RL11_ECO24	50S ribosomal protein L11 OS=Escherichia coli O139:H28 (strain E24377A / ETEC) GN=rplK PE=3 SV=1	rplK
sp|A7ZUK0|RL7_ECO24	50S ribosomal protein L7/L12 OS=Escherichia coli O139:H28 (strain E24377A / ETEC) GN=rplL PE=3 SV=1	rplL
sp|A7ZSI3|RL17_ECO24	50S ribosomal protein L17 OS=Escherichia coli O139:H28 (strain E24377A / ETEC) GN=rplQ PE=3 SV=1	rplQ
sp|B7UK36|RL29_ECO27	50S ribosomal protein L29 OS=Escherichia coli O127:H6 (strain E2348/69 / EPEC) GN=rpmC PE=3 SV=1	rpmC
sp|B7UNQ6|RL31_ECO27	50S ribosomal protein L31 OS=Escherichia coli O127:H6 (strain E2348/69 / EPEC) GN=rpmE PE=3 SV=1	rpmE
sp|A7ZTI7|RL33_ECO24	50S ribosomal protein L33 OS=Escherichia coli O139:H28 (strain E24377A / ETEC) GN=rpmG PE=3 SV=1	rpmG
sp|P0AG69|RS1_ECO57	30S ribosomal protein S1 OS=Escherichia coli O157:H7 GN=rpsA PE=3 SV=1	rpsA
sp|A7ZSL0|RS10_ECO24	30S ribosomal protein S10 OS=Escherichia coli O139:H28 (strain E24377A / ETEC) GN=rpsJ PE=3 SV=1	rpsJ
sp|A7ZSK0|RS17_ECO24	30S ribosomal protein S17 OS=Escherichia coli O139:H28 (strain E24377A / ETEC) GN=rpsQ PE=3 SV=1	rpsQ
sp|A7ZRU7|RS21_ECO24	30S ribosomal protein S21 OS=Escherichia coli O139:H28 (strain E24377A / ETEC) GN=rpsU PE=3 SV=1	rpsU
sp|B7UJQ9|TIG_ECO27	Trigger factor OS=Escherichia coli O127:H6 (strain E2348/69 / EPEC) GN=tig PE=3 SV=1	tig
sp|B7UMH5|TNAA_ECO27	Tryptophanase OS=Escherichia coli O127:H6 (strain E2348/69 / EPEC) GN=tnaA PE=3 SV=1	tnaA
sp|B7UIL5|EFTS_ECO27	Elongation factor Ts OS=Escherichia coli O127:H6 (strain E2348/69 / EPEC) GN=tsf PE=3 SV=1	tsf
sp|A8A5E6|EFTU1_ECOHS	Elongation factor Tu 1 OS=Escherichia coli O9:H4 (strain HS) GN=tuf1 PE=3 SV=1	tuf1
sp|P64456|YDCY_ECOL6	Uncharacterized protein YdcY OS=Escherichia coli O6:H1 (strain CFT073 / ATCC 700928 / UPEC) GN=ydcY PE=4 SV=1	ydcY
sp|P0AD05|YECA_ECOLI	Uncharacterized protein YecA OS=Escherichia coli (strain K12) GN=yecA PE=4 SV=1	yecA
sp|B7UT45|YEEX_ECO27	UPF0265 protein YeeX OS=Escherichia coli O127:H6 (strain E2348/69 / EPEC) GN=yeeX PE=3 SV=1	yeeX
sp|B7UFK4|YEJL_ECO27	UPF0352 protein YejL OS=Escherichia coli O127:H6 (strain E2348/69 / EPEC) GN=yejL PE=3 SV=1	yejL
sp|P0ADN3|YIFE_ECOL6	UPF0438 protein YifE OS=Escherichia coli O6:H1 (strain CFT073 / ATCC 700928 / UPEC) GN=yifE PE=3 SV=2	yifE
sp|P0ADQ0|YIHD_ECOL6	Protein yihD OS=Escherichia coli O6:H1 (strain CFT073 / ATCC 700928 / UPEC) GN=yihD PE=4 SV=1	yihD
sp|P68207|YJBJ_ECO57	UPF0337 protein YjbJ OS=Escherichia coli O157:H7 GN=yjbJ PE=3 SV=1	yjbJ
sp|Q46868|YQIC_ECOLI	Uncharacterized protein YqiC OS=Escherichia coli (strain K12) GN=yqiC PE=1 SV=2	yqiC
