# Supplementary material for: Structural, Kinetic and Proteomic Characterization of Acetyl Phosphate-Dependent Bacterial Protein Acetylation
Source: PLoS One. 2014 Apr 22;9(4):e94816. doi: 10.1371/journal.pone.0094816 (PMC3995681; doi:10.1371/journal.pone.0094816)
Supplement: Table S13 — Quantitative MS1 Filtering of acetylated proteins on the protein lysate level (quantification of non-modified peptides) for proteins that contained acetyl sites upregulated in the ackA mutant relative to WT. (XLSX) [file pone.0094816.s023.xlsx]

## Sheet: S13 protein_quant_ackA
Table S13. Quantitative MS1 Filtering of acetylated proteins on the protein lysate level for proteins that contained acetyl sites upregulated in the ackA mutant relative to WT
	For 4 Biological Replicates B0, B1, B2, and B3 non-modified peptides from protein lysates were quantified
				Combined	B0		B1		B2		B3
Protein Accession	SwissProt #	Protein Description	Gene Name	Protein Ratios	Peptide Ratios ackA	Protein Ratios ackA	Peptide Ratios ackA	Protein Ratios ackA	Peptide Ratios ackA	Protein Ratios ackA	Peptide Ratios ackA	Protein Ratios ackA
sp|A7ZHS5|ACCA_ECO24	A7ZHS5	Acetyl-coenzyme A carboxylase carboxyl transferase subunit alpha OS=Escherichia coli O139:H28 (strain E24377A / ETEC) GN=accA PE=3 SV=1	accA	0.851998	['0.58', '0.54', '0.44', '0.49', '0.55', '0.34', '0.74', '0.84', '0.83', '0.48', '0.90', '0.44', '0.57', '0.63', '0.48', '0.53', '0.45', '0.62', '0.62', '0.67', '0.61', '1.33', '1.15', '0.73', '0.45', '0.49', '0.38', '0.58', '0.66', '0.56', '0.43', '0.42', '0.74', '0.43', '0.40', '0.16', '0.82', '0.55', '0.55', '0.91', '0.88', '1.43', '0.76', '0.81', '0.87', '0.78', '0.86', '0.88']	0.610566	['2.04', '1.96', '1.72', '1.19', '1.23', '1.55', '0.66', '1.34', '2.55', '1.18', '1.16', '1.17', '1.20', '1.15', '1.24', '0.85', '1.16', '0.77', '0.99', '1.74', '1.31', '4.08', '1.80', '0.45', '1.12', '0.95', '1.30', '0.95', '0.97', '1.10', '6.54', '5.46', '1.95', '1.06', '1.37', '0.74', '0.56', '0.55', '0.93', '0.78', '1.06', '0.67', '0.83', '1.57', '1.00', '0.13', '0.65', '0.96', '3.10', '3.20'…	1.23181	['0.33', '0.29', '0.27', '0.35', '0.28', '0.27', '0.54', '0.49', '0.52', '0.56', '0.43', '0.58', '0.38', '0.58', '0.86', '0.46', '0.61', '0.49', '0.48', '0.49', '0.51', '0.34', '1.93', '0.51', '0.58', '0.98', '1.10', '0.38', '0.45', '1.27', '0.59', '0.64', '0.48', '3.60', '1.90', '1.91', '0.46', '0.44', '0.44', '5.37', '0.76', '0.71', '1.06', '0.63', '0.66', '0.35', '0.47', '0.51', '1.07', '1.11'…	0.613574	['1.18', '1.16', '1.19', '1.02', '1.16', '0.95', '1.09', '1.20', '1.28', '0.49', '0.62', '1.17', '0.38', '0.47', '0.81', '1.81', '0.86', '2.00', '1.82', '1.83', '1.74', '1.29', '1.42', '1.27', '0.98', '0.35', '0.67', '1.08', '0.54', '4.04', '0.68', '1.21', '1.53', '1.57', '1.18', '2.00', '1.30', '1.09', '1.43', '1.22', '1.30', '0.77', '0.36', '2.65', '0.83', '1.16', '3.33', '1.43', '1.59', '1.15'…	1.14186
sp|P0ABD9|BCCP_ECOL6	P0ABD9	Biotin carboxyl carrier protein of acetyl-CoA carboxylase OS=Escherichia coli O6:H1 (strain CFT073 / ATCC 700928 / UPEC) GN=accB PE=3 SV=1	accB	0.927326	['0.40', '0.43', '0.46', '0.20', '0.36', '0.05', '1.01', '1.38', '1.32', '0.97', '1.28', '1.34']	0.560174	['0.11', '0.38', '0.37', '0.55', '0.70', '0.77', '1.45', '1.14', '0.74', '0.89', '1.12', '0.90', '1.13', '1.06', '1.04', '0.77', '0.62', '0.63', '7.37', '7.15', '6.60', '5.29', '5.15', '5.03']	1.20575	['0.70', '0.96', '0.59', '1.43', '1.41', '0.55', '1.06', '1.05', '1.19', '1.91', '1.26', '1.38', '0.41', '0.41', '0.46', '0.55', '0.53', '0.60']	0.81629	['1.96', '3.01', '1.39', '3.05', '2.66', '2.18', '0.79', '0.68', '0.81', '0.78', '0.83', '0.83']	1.34123
sp|Q8X9B6|ACCC_ECO57	Q8X9B6	Biotin carboxylase OS=Escherichia coli O157:H7 GN=accC PE=3 SV=1	accC	0.79441	['0.49', '0.19', '0.49', '0.76', '0.75', '0.84', '0.55', '0.52', '0.65', '0.51', '0.69', '0.12', '0.48', '0.57', '0.38', '0.41', '0.52', '1.03', '0.44', '0.42', '0.34', '1.24', '1.81', '1.28', '0.62', '0.75', '0.58', '0.60', '0.52', '0.68', '0.20', '0.37', '2.45', '0.95', '0.37', '0.61', '0.47', '0.53', '0.16', '0.49', '0.48', '0.57', '0.71', '0.88', '1.44', '0.50', '0.38', '0.39']	0.556526	['2.27', '0.91', '1.62', '0.53', '0.82', '0.36', '0.96', '0.68', '0.80', '0.36', '0.44', '0.31', '0.64', '0.85', '0.88', '3.89', '1.36', '2.55', '0.74', '0.80', '0.89', '0.47', '0.88', '1.01', '3.14', '3.04', '1.61', '4.96', '3.19', '0.37', '0.99', '0.74', '0.72', '1.54', '1.12', '0.98', '0.38', '0.43', '0.59', '1.22', '0.91', '1.30', '0.97', '1.32', '0.99', '0.63', '0.64', '0.68', '0.62', '1.63'…	0.950093	['0.60', '0.51', '0.67', '0.49', '0.52', '0.56', '0.72', '1.27', '1.84', '0.65', '0.55', '0.41', '0.61', '0.38', '0.53', '0.97', '1.27', '1.05', '0.51', '0.43', '0.45', '0.55', '0.84', '1.78', '0.79', '0.46', '0.76', '0.52', '0.57', '0.46', '0.70', '0.28', '0.40', '0.63', '0.53', '0.71', '0.55', '0.56', '0.53', '0.87', '2.95', '0.43', '0.90', '0.29', '2.69']	0.661721	['0.85', '1.06', '0.80', '1.07', '0.99', '0.97', '1.41', '1.45', '1.70', '0.68', '0.55', '0.31', '0.97', '1.07', '0.81', '1.05', '1.05', '1.04', '0.63', '0.94', '0.89', '1.85', '1.37', '1.98', '1.68', '1.26', '0.73', '1.00', '1.09', '0.91', '2.13', '1.24', '1.13', '1.22', '1.28', '1.01', '1.20', '0.69', '1.22', '1.29', '1.42', '1.34', '3.94', '1.48', '4.33']	1.13829
sp|A7ZPD1|ACCD_ECO24	A7ZPD1	Acetyl-coenzyme A carboxylase carboxyl transferase subunit beta OS=Escherichia coli O139:H28 (strain E24377A / ETEC) GN=accD PE=3 SV=1	accD	0.828868	['0.29', '0.33', '0.40', '0.47', '0.50', '0.40', '0.97', '0.92', '0.46', '0.58', '0.41', '0.55', '0.79', '0.54', '0.19', '0.99', '0.80', '1.45', '0.30', '0.42', '0.36', '0.54', '0.46', '0.47', '0.45', '0.45', '1.02', '0.40', '0.58', '0.92', '0.44', '0.37', '0.77', '0.51', '0.40', '0.34', '0.75', '0.87', '0.69', '0.37', '0.43', '0.45', '0.41', '0.31', '0.35', '0.37', '1.11', '0.67', '0.45', '0.44'…	0.510204	['0.56', '0.78', '1.22', '1.01', '0.94', '1.31', '31.80', '18.29', '10.48', '2.08', '1.47', '1.30', '0.84', '0.92', '1.12', '0.51', '0.75', '0.60', '0.72', '0.61', '0.43', '1.51', '1.22', '1.21', '1.04', '0.83', '0.93', '0.96', '0.91', '0.93', '0.76', '0.80', '0.70', '1.67', '1.86', '2.05', '0.59', '0.51', '0.82', '0.39', '0.43', '0.46', '1.02', '0.99', '0.68', '1.33', '1.07', '1.28', '0.72', '0.…	1.11694	['0.44', '0.60', '0.18', '0.62', '0.45', '1.05', '0.58', '0.52', '0.65', '0.74', '0.49', '1.50', '0.37', '0.36', '0.44', '0.75', '0.51', '0.88', '0.52', '0.52', '0.78', '0.66', '0.61', '0.65', '0.66', '0.88', '0.80', '1.09', '0.76', '1.06', '0.67', '0.66', '1.17', '0.77', '0.72', '0.71', '1.04', '0.78', '0.96', '0.49', '0.56', '0.96', '0.39', '0.55', '0.29', '0.92', '0.69', '1.06']	0.650308	['1.31', '1.29', '2.55', '3.04', '5.59', '3.40', '0.76', '0.92', '1.03', '1.36', '1.13', '1.72', '1.40', '1.43', '1.35', '2.12', '3.21', '2.14', '1.52', '1.24', '1.80', '1.80', '0.29', '0.27', '1.83', '1.76', '1.59', '1.58', '1.77', '1.47', '0.80', '1.29', '1.54', '0.96', '1.88', '1.88', '0.54', '0.40', '0.70', '0.12', '0.62', '1.08', '1.38', '1.31', '0.68', '1.18', '0.97', '0.85', '1.42', '1.69'…	1.27364
sp|P0A9G7|ACEA_ECOL6	P0A9G7	Isocitrate lyase OS=Escherichia coli O6:H1 (strain CFT073 / ATCC 700928 / UPEC) GN=aceA PE=3 SV=1	aceA	0.804631	['1.66', '1.63', '3.47', '0.23', '1.00', '0.35', '1.20', '1.90', '0.83', '1.77', '1.24', '1.08', '1.16', '1.50', '1.13', '1.23', '0.80', '1.70', '0.62', '0.88', '0.97', '0.86', '0.85', '1.02', '1.68', '0.92', '0.99', '1.68', '2.41', '0.75', '3.09', '3.03', '10.12', '0.54', '1.12', '0.28', '0.81', '1.10', '1.27', '0.55', '0.57', '0.42', '1.02', '0.98', '0.57', '4.64', '3.64', '1.10', '2.50', '2.13…	0.94974	['1.01', '1.11', '0.84', '1.34', '1.43', '0.61', '1.61', '0.97', '0.85', '1.42', '1.23', '0.93', '0.77', '0.87', '0.74', '1.33', '2.30', '1.36', '1.06', '2.24', '3.54', '2.05', '1.80', '2.26', '1.36', '1.41', '1.88', '0.94', '0.99', '1.07', '1.39', '0.86', '1.18', '1.54', '1.17', '0.87', '0.80', '1.00', '0.94', '1.74', '0.67', '0.47', '1.59', '1.64', '6.20', '1.69', '1.39', '2.55', '0.85', '0.65'…	1.02184	['0.60', '0.50', '0.66', '0.88', '0.37', '0.89', '0.42', '0.40', '0.40', '0.82', '0.72', '0.79', '0.71', '0.93', '0.75', '0.52', '0.60', '0.38', '0.70', '0.53', '0.82', '0.64', '0.87', '0.71', '0.42', '0.57', '0.66', '0.42', '0.46', '0.39', '2.19', '0.31', '0.38', '0.51', '0.63', '0.54', '0.64', '0.64', '0.62', '0.78', '0.60', '1.80', '0.78', '0.65', '0.73', '0.79', '0.73', '1.49', '0.57', '0.13'…	0.69215	['0.53', '0.66', '2.44', '0.46', '0.38', '0.70', '0.14', '0.12', '0.36', '0.33', '0.36', '0.36', '0.30', '0.68', '0.33', '0.47', '0.37', '0.50', '0.26', '0.50', '0.31', '0.81', '0.61', '0.61', '0.92', '0.24', '0.24', '0.48', '0.51', '0.69', '1.22', '0.64', '0.66', '1.69', '0.83', '1.94', '0.61', '0.75', '0.75', '3.11', '0.46', '3.96', '1.81', '1.16', '1.14', '1.13', '0.89', '1.83', '0.64', '1.27'…	0.624022
sp|P0AFG8|ODP1_ECOLI	P0AFG8	Pyruvate dehydrogenase E1 component OS=Escherichia coli (strain K12) GN=aceE PE=1 SV=2	aceE	2.22391	['0.85', '1.01', '1.09', '2.83', '2.62', '2.48', '2.92', '2.92', '2.95', '6.07', '3.85', '6.37', '3.81', '3.72', '3.32', '4.85', '4.14', '5.02', '0.93', '1.35', '1.61', '1.82', '3.95', '1.62', '2.68', '2.94', '1.94', '1.22', '0.79', '2.15', '2.73', '2.26', '2.59', '1.52', '1.27', '1.12', '1.03', '3.43', '1.89', '1.71', '1.55', '2.43', '1.59', '1.31', '0.80', '2.31', '1.77', '1.32', '3.77', '2.24'…	2.14672	['4.26', '4.86', '4.15', '3.09', '3.71', '3.71', '1.89', '2.46', '2.18', '2.95', '3.75', '2.14', '3.59', '0.73', '1.26', '1.17', '1.58', '1.02', '1.20', '0.69', '1.08', '2.89', '2.29', '1.38', '2.23', '0.81', '1.38', '4.40', '2.38', '3.44', '1.12', '1.33', '1.57', '3.82', '3.65', '2.22', '24.26', '26.33', '33.56', '5.01', '4.45', '3.97', '4.61', '4.07', '3.21', '2.72', '2.45', '1.45', '2.66', '2.…	2.45954	['0.71', '1.45', '3.41', '1.85', '1.98', '1.72', '15.72', '3.94', '14.51', '1.68', '1.53', '1.53', '1.87', '2.02', '1.77', '2.67', '2.02', '2.65', '1.06', '1.42', '1.76', '3.86', '3.28', '2.44', '1.71', '1.77', '1.38', '0.68', '1.04', '0.93', '1.15', '0.61', '1.43', '2.32', '2.51', '2.76', '1.36', '1.99', '3.13', '3.60', '3.02', '2.05', '3.71', '3.35', '3.47', '1.94', '2.70', '1.89', '4.47', '2.3…	2.1444	['3.90', '3.54', '2.65', '1.42', '1.24', '1.36', '2.35', '2.28', '2.15', '1.97', '1.88', '2.09', '1.95', '1.99', '1.85', '2.27', '2.24', '2.20', '1.40', '1.98', '2.73', '3.33', '2.37', '2.03', '1.71', '3.39', '2.44', '1.95', '1.65', '1.35', '2.79', '2.73', '2.45', '1.42', '1.57', '1.54', '2.98', '3.24', '3.34', '3.62', '1.24', '2.25', '2.60', '2.27', '2.62', '2.83', '1.82', '1.84', '3.83', '3.58'…	2.16042
sp|P06959|ODP2_ECOLI	P06959	Dihydrolipoyllysine-residue acetyltransferase component of pyruvate dehydrogenase complex OS=Escherichia coli (strain K12) GN=aceF PE=1 SV=3	aceF	2.01848	['4.30', '5.56', '3.88', '3.35', '3.33', '3.61', '6.24', '5.58', '2.51', '6.14', '6.22', '6.46', '9.02', '2.07', '7.76', '0.17', '0.53', '0.35', '12.44', '8.35', '11.64', '3.35', '2.33', '1.57', '3.67', '2.26', '1.89', '1.18', '5.75', '2.61', '3.06', '3.17', '1.70', '1.45', '5.94', '5.35', '4.83', '4.98', '3.71', '1.90', '3.29', '3.56', '3.48', '4.60', '2.81', '3.27', '3.62', '1.32', '4.04', '4.5…	2.92553	['3.25', '3.86', '3.13', '1.56', '1.32', '5.26', '3.51', '3.49', '1.89', '2.54', '3.06', '3.12', '3.30', '1.51', '2.19', '0.44', '0.52', '0.49', '0.30', '1.06', '0.65', '2.29', '1.71', '1.57', '2.18', '1.11', '1.07', '1.25', '3.37', '2.05', '0.79', '1.12', '0.45', '1.15', '1.18', '0.96', '2.48', '2.54', '2.04', '1.32', '2.01', '2.68', '1.85', '2.15', '2.63', '0.56', '0.60', '0.47', '1.89', '2.03'…	1.67227	['6.40', '5.94', '3.40', '0.57', '3.49', '0.26', '2.01', '0.58', '1.03', '1.96', '2.01', '1.88', '2.79', '1.33', '1.36', '7.75', '4.84', '3.91', '0.87', '0.52', '36.42', '2.24', '1.84', '2.09', '3.07', '3.22', '3.29', '0.15', '2.22', '1.45', '1.09', '1.90', '0.64', '0.06', '0.05', '0.08', '0.62', '0.66', '1.18', '0.92', '0.75', '1.71', '1.88', '2.46', '3.05', '0.87', '1.02', '1.46', '4.11', '3.82…	1.46365	['1.42', '1.89', '0.92', '3.37', '3.98', '2.87', '2.95', '1.27', '2.50', '1.61', '2.27', '1.89', '1.74', '1.21', '1.43', '2.39', '1.27', '2.61', '0.57', '0.29', '0.35', '2.47', '2.45', '2.39', '2.31', '2.07', '2.31', '1.82', '2.13', '2.32', '6.86', '6.41', '3.14', '0.93', '2.96', '2.18', '2.80', '2.61', '2.19', '2.62', '3.00', '2.67', '2.33', '2.49', '2.34', '7.55', '9.00', '2.47', '3.41', '3.40'…	2.31819
sp|P36683|ACON2_ECOLI	P36683	Aconitate hydratase 2 OS=Escherichia coli (strain K12) GN=acnB PE=1 SV=3	acnB	1.05163	['1.24', '1.34', '1.38', '1.35', '1.42', '1.65', '1.67', '1.71', '1.80', '1.06', '0.89', '1.10', '1.36', '1.29', '0.93', '0.92', '0.86', '0.93', '1.25', '1.20', '1.32', '1.33', '1.55', '0.85', '1.18', '0.92', '1.19', '1.31', '1.23', '1.32', '1.17', '1.35', '0.58', '1.34', '1.15', '0.97', '0.82', '0.89', '0.78', '1.06', '1.19', '0.73', '1.48', '1.50', '0.79', '1.26', '1.01', '0.99', '1.49', '0.26'…	1.08794	['0.93', '1.00', '0.97', '1.60', '2.43', '3.23', '1.07', '1.51', '1.67', '1.12', '0.58', '1.27', '1.06', '1.26', '1.00', '1.44', '1.44', '1.63', '2.00', '2.18', '2.44', '3.94', '4.57', '2.32', '1.17', '2.29', '2.25', '0.71', '1.18', '0.41', '1.43', '1.29', '1.32', '1.32', '1.15', '1.19', '1.59', '1.55', '1.21', '0.98', '1.07', '1.29', '0.47', '0.46', '0.44', '0.72', '0.79', '0.60', '0.24', '0.88'…	1.18458	['0.42', '0.74', '1.08', '1.19', '0.64', '0.42', '1.06', '1.24', '0.94', '0.31', '0.29', '0.31', '0.39', '0.37', '0.39', '0.58', '0.55', '0.48', '0.87', '0.76', '0.82', '1.65', '0.16', '0.11', '0.49', '0.49', '0.28', '0.22', '0.34', '0.45', '0.93', '0.71', '1.86', '0.58', '0.68', '0.53', '0.81', '0.81', '0.76', '1.13', '1.02', '0.94', '0.63', '0.49', '0.61', '0.37', '0.38', '0.49', '1.42', '1.27'…	0.728287	['1.00', '1.35', '1.08', '1.94', '2.11', '1.33', '1.66', '1.40', '1.44', '2.17', '1.47', '1.38', '1.77', '2.43', '2.05', '2.00', '1.84', '1.95', '1.59', '1.26', '1.49', '1.19', '1.30', '1.39', '0.99', '1.57', '1.82', '2.23', '3.11', '3.35', '1.14', '1.47', '1.27', '1.11', '1.20', '1.11', '1.22', '1.30', '1.27', '1.58', '1.49', '1.64', '2.60', '6.34', '1.74', '1.44', '1.34', '0.96', '1.29', '1.33'…	1.30311
sp|P0A9Q8|ADHE_ECO57	P0A9Q8	Aldehyde-alcohol dehydrogenase OS=Escherichia coli O157:H7 GN=adhE PE=3 SV=2	adhE	0.587338	['0.65', '0.49', '0.33', '0.03', '0.39', '0.28', '0.53', '0.55', '0.53', '0.71', '0.83', '0.81', '0.71', '0.70', '0.82', '0.53', '0.91', '0.52', '0.49', '0.53', '0.93', '0.62', '0.58', '0.63', '0.60', '0.79', '0.58', '0.89', '0.90', '1.50', '0.65', '0.54', '0.32', '0.52', '0.50', '0.49', '0.53', '0.67', '0.41', '0.56', '1.20', '0.50', '0.36', '0.73', '0.54', '0.36', '0.59', '0.59', '0.37', '0.25'…	0.526051	['0.38', '0.40', '0.42', '0.39', '0.40', '0.55', '0.33', '0.36', '0.32', '0.27', '0.27', '0.28', '0.31', '0.45', '0.33', '0.49', '0.41', '0.93', '0.63', '0.61', '0.75', '1.00', '6.21', '8.77', '0.56', '0.50', '0.76', '0.52', '1.06', '1.92', '0.59', '0.30', '0.92', '0.45', '0.42', '0.47', '0.17', '0.20', '0.25', '0.45', '1.45', '0.32', '0.19', '5.50', '1.93', '0.23', '3.04', '3.81', '0.26', '0.37'…	0.551329	['0.37', '0.54', '0.59', '0.45', '0.34', '0.42', '0.30', '0.32', '0.32', '0.73', '0.51', '0.36', '0.43', '0.43', '0.52', '0.68', '0.56', '0.78', '1.36', '1.48', '1.66', '1.95', '0.88', '0.30', '0.54', '0.53', '0.76', '0.36', '0.48', '0.43', '0.41', '0.32', '1.15', '0.51', '0.42', '0.53', '0.54', '0.68', '0.33', '0.34', '0.31', '0.19', '1.23', '0.75', '0.49', '0.24', '0.35', '0.20', '3.28', '5.27'…	0.460664	['0.68', '0.70', '0.63', '0.74', '0.65', '0.76', '0.66', '0.68', '0.71', '1.22', '1.16', '1.29', '0.72', '0.75', '0.90', '0.76', '1.06', '0.10', '1.18', '0.96', '1.23', '0.64', '2.79', '4.06', '0.67', '0.69', '0.67', '1.07', '1.72', '1.08', '0.39', '0.42', '0.36', '1.15', '1.22', '0.70', '0.56', '0.59', '0.71', '0.62', '0.58', '0.60', '0.44', '0.44', '0.46', '0.63', '0.50', '0.53', '0.73', '0.42'…	0.890692
sp|B7UKF4|KAD_ECO27	B7UKF4	Adenylate kinase OS=Escherichia coli O127:H6 (strain E2348/69 / EPEC) GN=adk PE=3 SV=1	adk	0.889519	['0.64', '0.62', '0.65', '0.41', '0.75', '0.44', '0.63', '0.73', '0.94', '0.88', '1.05', '0.69', '0.60', '0.64', '0.61', '0.58', '0.52', '0.87', '0.88', '0.81', '0.60', '0.92', '0.93', '0.89', '0.79', '2.40', '1.16', '0.64', '0.69', '0.64', '0.26', '0.26', '0.24', '0.47', '0.56', '0.51', '0.51', '0.52', '1.36', '0.85', '0.80', '0.34', '0.47', '0.46', '0.57', '0.48', '0.44', '0.41', '1.41', '0.57'…	0.633108	['0.62', '0.61', '0.65', '0.82', '0.84', '0.86', '1.36', '1.46', '1.12', '1.36', '1.56', '1.03', '1.49', '0.56', '1.27', '1.73', '1.41', '1.16', '1.31', '1.36', '1.31', '0.63', '2.45', '1.63', '0.90', '0.89', '1.01', '0.74', '0.78', '0.92', '1.04', '1.07', '0.64', '0.77', '0.96', '1.54', '1.12', '0.98', '1.31', '0.82', '0.53', '0.58', '0.81', '0.75', '1.06', '1.01', '1.09', '1.00', '0.91', '0.95'…	1.02337	['1.17', '1.21', '1.12', '0.77', '0.73', '0.96', '0.61', '1.09', '0.48', '0.47', '0.60', '0.60', '0.74', '0.88', '0.47', '1.89', '1.04', '0.81', '0.66', '0.63', '0.62', '0.99', '0.64', '1.69', '0.94', '0.98', '0.78', '0.83', '0.70', '0.75', '0.55', '0.77', '0.64', '1.23', '1.08', '1.46', '0.61', '0.83', '0.79', '0.89', '0.86', '0.84', '1.97', '1.78', '1.27', '0.75', '0.68', '0.81']	0.852366	['1.14', '1.16', '1.11', '0.31', '1.96', '1.70', '1.95', '2.03', '2.02', '1.64', '1.74', '0.77', '0.94', '3.64', '1.54', '1.18', '1.23', '1.16', '1.51', '1.17', '1.30', '1.55', '1.37', '1.26', '0.84', '0.79', '0.60', '1.06', '2.35', '1.07', '0.79', '0.82', '0.73', '0.55', '0.59', '0.93', '1.05', '0.93', '1.10', '0.82', '0.83', '0.67', '0.96', '0.80', '0.49', '1.21', '0.79', '2.06', '0.91', '1.04'…	1.13367
sp|P0AE10|AHPC_ECO57	P0AE10	Alkyl hydroperoxide reductase subunit C OS=Escherichia coli O157:H7 GN=ahpC PE=3 SV=2	ahpC	0.813906	['0.79', '0.79', '0.98', '1.26', '1.20', '0.92', '1.34', '0.99', '1.23', '1.65', '1.57', '1.55', '0.62', '0.73', '0.80', '1.45', '1.43', '1.18', '1.32', '1.30', '1.26', '1.32', '1.35', '1.32', '0.72', '0.68', '0.66', '0.97', '0.96', '0.94', '0.54', '0.37', '0.91', '0.74', '0.74', '0.74', '0.83', '0.88', '0.87', '0.22', '0.27', '0.28', '0.39', '5.16', '7.35', '0.70', '0.70', '0.68', '0.62', '0.70'…	0.815825	['0.68', '0.62', '0.65', '0.97', '0.96', '0.89', '0.80', '0.79', '0.86', '1.97', '1.81', '1.71', '2.41', '1.25', '2.06', '0.79', '0.68', '0.81', '0.72', '0.69', '0.94', '0.50', '0.42', '0.50', '0.42', '0.59', '0.60', '1.33', '0.47', '1.42', '0.76', '0.78', '0.78', '1.94', '1.83', '1.28', '1.19', '1.69', '1.17', '1.26', '1.76', '1.94', '0.90', '0.88', '0.93', '0.65', '0.66', '0.66', '1.15', '1.24'…	0.901799	['0.69', '0.65', '0.65', '0.64', '0.59', '0.62', '0.58', '0.39', '0.42', '0.07', '0.07', '0.09', '0.71', '0.69', '0.75', '0.74', '0.60', '1.12', '0.74', '0.58', '1.21', '0.15', '0.74', '0.90', '0.68', '0.67', '0.66', '2.77', '2.10', '3.93', '0.72', '1.00', '0.97', '1.56', '31.94', '121.10', '0.68', '0.67', '0.69', '0.76', '0.76', '0.77', '0.62', '0.92', '1.14', '0.84', '1.26', '1.08', '0.50', '0.…	0.611185	['0.93', '0.93', '1.02', '0.89', '0.75', '0.69', '0.64', '1.08', '0.74', '0.70', '0.76', '0.73', '1.22', '1.24', '2.05', '0.65', '1.46', '1.12', '0.68', '1.45', '0.73', '0.70', '0.53', '2.29', '0.84', '0.89', '0.74', '0.93', '0.75', '0.73', '1.81', '1.94', '1.38', '1.01', '1.00', '1.04', '1.47', '1.27', '1.00', '1.40', '1.36', '1.27', '1.36', '1.11', '1.11', '0.94', '0.93', '0.90', '0.80', '0.81'…	0.975926
sp|P35340|AHPF_ECOLI	P35340	Alkyl hydroperoxide reductase subunit F OS=Escherichia coli (strain K12) GN=ahpF PE=1 SV=2	ahpF	0.765697	['0.72', '0.60', '3.52', '0.73', '0.86', '0.56', '0.51', '0.56', '0.45', '0.94', '1.49', '1.72', '1.03', '0.58', '0.50', '0.60', '0.55', '0.23', '0.57', '0.66', '0.51', '0.68', '0.70', '0.82', '0.77', '0.65', '0.98', '0.14', '0.51', '0.35', '0.61', '0.48', '0.45', '0.73', '0.56', '0.61', '0.73', '0.64', '0.54', '0.54', '0.50', '0.52', '0.94', '0.72', '0.84', '0.54', '0.77', '0.85', '0.79', '0.99'…	0.648793	['0.69', '0.58', '0.83', '0.23', '0.41', '0.92', '0.21', '0.31', '0.68', '0.56', '0.91', '1.01', '0.30', '0.34', '1.02', '0.51', '0.45', '0.51', '0.56', '0.62', '0.45', '0.53', '1.04', '0.41', '3.08', '1.78', '1.06', '0.29', '0.37', '0.30', '0.91', '0.73', '0.87', '0.96', '0.47', '0.33', '2.64', '1.25', '1.29', '1.20', '0.48', '0.48', '1.05', '0.90', '1.14', '0.97', '0.68', '0.74', '1.22', '1.13'…	0.754644	['1.12', '0.65', '0.64', '0.53', '0.71', '0.63', '1.36', '0.54', '0.67', '0.36', '0.21', '0.29', '0.80', '1.20', '0.97', '0.41', '0.48', '0.79', '0.45', '3.07', '0.86', '2.00', '2.78', '1.29', '0.52', '0.49', '0.75', '0.59', '1.57', '1.44', '0.61', '1.02', '0.64', '1.53', '0.83', '0.71', '0.89', '1.06', '1.28', '1.09', '0.43', '0.62', '3.04', '0.52', '1.07', '0.43', '0.41', '0.38', '1.65', '0.41'…	0.740655	['0.93', '1.01', '0.78', '0.86', '0.30', '0.39', '0.88', '0.82', '2.59', '3.29', '1.68', '2.39', '3.89', '3.62', '0.90', '1.46', '1.39', '1.87', '1.37', '0.96', '2.13', '0.60', '1.34', '0.45', '1.32', '1.12', '0.89', '1.20', '0.96', '0.43', '0.96', '1.30', '1.34', '1.12', '0.86', '1.02', '2.44', '0.88', '1.93', '1.75', '0.80', '0.70', '1.51', '1.63', '1.35', '1.28', '1.38', '1.58', '1.45', '1.60'…	0.9479
sp|Q8X3W8|SYA_ECO57	Q8X3W8	Alanine--tRNA ligase OS=Escherichia coli O157:H7 GN=alaS PE=3 SV=2	alaS	0.91888	['0.66', '0.72', '0.39', '0.58', '1.03', '0.55', '0.46', '0.60', '0.50', '0.49', '0.49', '0.41', '0.74', '0.76', '0.83', '0.29', '0.30', '0.21', '0.76', '0.40', '0.41', '0.51', '0.56', '0.45', '0.82', '0.78', '0.71', '0.82', '0.83', '0.55', '0.70', '1.09', '0.61', '0.83', '0.97', '1.09', '1.02', '1.43', '2.29', '1.15', '1.18', '1.09', '0.80', '0.67', '0.81', '1.03', '1.77', '1.21', '0.92', '1.53'…	0.739381	['1.01', '1.03', '0.48', '0.74', '0.23', '1.05', '2.04', '1.28', '0.94', '1.30', '0.60', '0.28', '0.70', '0.97', '1.10', '0.87', '0.77', '0.74', '1.21', '1.08', '0.96', '0.60', '0.61', '0.84', '1.22', '1.06', '0.85', '1.14', '1.11', '0.95', '0.06', '0.04', '0.13', '0.88', '0.83', '0.95', '0.88', '0.85', '1.02', '0.82', '0.88', '1.10', '0.35', '1.68', '1.63', '0.96', '0.91', '1.40', '3.04', '3.63'…	0.899429	['0.55', '1.87', '0.44', '0.67', '0.90', '0.68', '0.43', '0.62', '0.51', '1.06', '0.66', '0.56', '0.86', '0.75', '0.49', '0.50', '0.81', '0.56', '1.85', '0.89', '0.65', '0.76', '0.73', '0.95', '0.68', '0.56', '1.08', '1.19', '0.81', '1.14', '0.53', '0.60', '1.42', '1.27', '1.24', '1.81', '0.08', '0.12', '11.85', '0.70', '0.51', '0.98', '0.35', '0.54', '0.40', '0.54', '0.53', '0.39', '0.78', '0.96…	0.781547	['1.11', '1.40', '0.89', '5.13', '17.83', '1.10', '1.54', '0.70', '0.26', '1.07', '0.99', '1.42', '1.15', '0.65', '1.38', '0.90', '0.89', '0.85', '0.77', '1.00', '0.61', '1.39', '0.97', '2.94', '0.07', '0.07', '0.19', '1.45', '1.43', '1.63', '1.44', '1.23', '1.10', '1.32', '1.14', '1.22', '0.93', '0.39', '0.46', '1.07', '0.99', '0.50', '1.12', '2.48', '1.59', '0.80', '0.78', '0.55', '1.19', '2.33…	1.37166
sp|P0AE13|AMN_ECO57	P0AE13	AMP nucleosidase OS=Escherichia coli O157:H7 GN=amn PE=3 SV=1	amn	0.669946			['1.31', '1.40', '3.39', '2.01', '0.73', '1.68', '1.04', '0.53', '0.61', '0.89', '0.65', '1.13']	1.10795	['0.30', '0.22', '0.26', '0.60', '0.31', '0.27']	0.307255	['0.50', '0.51', '0.43', '0.87', '0.91', '1.66', '0.59', '0.92', '1.01', '0.68', '2.76', '0.93', '1.10', '0.83', '0.91', '0.71', '1.66', '0.78']	0.883281
sp|A7ZIM8|APT_ECO24	A7ZIM8	Adenine phosphoribosyltransferase OS=Escherichia coli O139:H28 (strain E24377A / ETEC) GN=apt PE=3 SV=1	apt	0.761305	['0.59', '0.77', '0.48', '0.81', '0.76', '0.69', '0.44', '0.45', '0.89']	0.632851	['1.01', '1.15', '1.20', '0.85', '0.97', '0.72', '0.89', '0.75', '1.28', '0.94', '1.62', '1.01', '2.96', '2.00', '1.25', '3.67', '3.35', '4.38', '4.10', '5.52', '5.86', '0.23', '0.39', '1.17', '1.15', '0.83', '1.81', '1.57', '1.16', '1.93']	1.41981	['0.62', '0.65', '0.91', '0.42', '0.48', '0.31', '0.62', '0.34', '0.99', '1.31', '1.18', '0.97', '0.30', '0.52', '0.47', '0.32', '0.42', '0.77', '0.23', '0.48', '0.33', '0.51', '0.49', '0.30', '0.76', '0.67', '0.50', '0.04', '0.09', '0.08', '1.06', '0.96', '0.88', '0.35', '0.44', '0.32']	0.454669	['1.21', '1.78', '0.14', '0.79', '0.46', '0.37', '1.81', '2.00', '0.76', '0.73', '0.87', '0.86', '0.61', '0.53', '0.85', '0.97', '0.87', '0.92', '1.15', '1.78', '3.12', '0.99', '0.97', '0.71', '0.98', '0.78', '0.73', '0.58', '0.48', '0.44', '0.78', '0.70', '0.74']	0.822258
sp|P0A9Q3|ARCA_ECO57	P0A9Q3	Aerobic respiration control protein ArcA OS=Escherichia coli O157:H7 GN=arcA PE=3 SV=1	arcA	0.920328	['1.76', '0.75', '0.88', '0.71', '0.79', '0.80', '0.58', '0.56', '0.46', '1.27', '1.16', '1.03', '1.05', '1.24', '1.04', '0.59', '0.59', '0.71', '0.75', '0.48', '0.55', '0.94', '1.34', '1.01', '0.94', '1.02', '0.87', '0.57', '0.90', '0.85', '4.36', '3.75', '3.82', '0.83', '1.12', '0.82', '0.81', '0.89', '0.93', '0.61', '0.51', '0.87', '0.51', '0.54', '0.54', '1.10', '1.06', '1.48', '0.70', '0.86'…	0.914413	['1.12', '1.29', '1.19', '1.23', '1.31', '2.31', '2.32', '2.69', '2.43', '1.50', '2.74', '1.40', '0.70', '1.16', '0.96', '0.61', '0.90', '0.59', '1.35', '0.94', '1.22', '1.18', '1.17', '1.07', '0.81', '1.12', '0.70', '1.97', '1.99', '2.08', '0.73', '0.75', '0.82', '1.07', '1.59', '1.42', '0.85', '1.01', '1.01', '0.82', '1.01', '0.64', '0.76', '0.78', '0.61', '0.65', '0.72', '0.72', '1.01', '0.91'…	1.07877	['0.36', '0.52', '0.30', '0.52', '0.51', '0.67', '0.54', '0.37', '0.59', '0.58', '0.48', '0.56', '0.43', '0.51', '0.52', '1.08', '1.10', '0.95', '0.66', '0.97', '0.69', '0.71', '0.88', '0.87', '0.76', '0.81', '0.84', '0.92', '0.94', '1.11', '0.94', '0.49', '0.50', '1.10', '1.14', '1.20', '1.30', '1.10', '0.98', '0.55', '0.67', '0.81', '0.41', '0.87', '0.87', '0.64', '0.80', '0.69', '1.56', '1.03'…	0.723511	['1.00', '0.96', '0.81', '1.21', '1.54', '0.96', '1.02', '0.89', '1.00', '1.01', '1.52', '1.23', '1.10', '0.47', '1.35', '3.39', '1.77', '1.85', '0.61', '0.58', '0.59', '1.46', '1.47', '0.74', '0.96', '0.92', '0.98', '0.89', '1.20', '0.92', '0.85', '0.83', '0.98', '0.99', '0.97', '0.78', '0.65', '0.79', '0.91', '0.40', '1.75', '1.43', '0.78', '0.81', '0.85', '0.77', '1.25', '1.96']	1.0052
sp|P0AB92|AROG_ECO57	P0AB92	Phospho-2-dehydro-3-deoxyheptonate aldolase, Phe-sensitive OS=Escherichia coli O157:H7 GN=aroG PE=3 SV=1	aroG	0.880648	['0.79', '0.89', '1.10', '1.37', '1.11', '1.13', '0.58', '2.40', '0.57', '0.84', '1.14', '1.45', '0.60', '0.83', '0.60', '0.90', '0.82', '0.72', '0.67', '0.76', '1.15', '1.07', '1.14', '0.83']	0.920484	['1.15', '1.39', '2.85', '0.26', '0.72', '0.12', '1.23', '0.90', '0.96', '1.23', '1.05', '0.99', '0.61', '0.57', '0.49', '1.14', '1.77', '1.66', '1.29', '0.79', '1.24', '0.59', '1.13', '1.43', '1.39', '1.83', '1.44']	0.961447	['0.80', '0.75', '3.84', '1.18', '0.89', '1.37', '1.10', '0.46', '0.67', '0.44', '0.51', '0.37', '0.70', '1.06', '1.62', '0.99', '0.65', '1.16', '0.35', '0.45', '0.12', '1.81', '0.89', '0.91', '0.52', '0.48', '0.60']	0.743465	['0.88', '1.47', '1.64', '1.84', '0.50', '0.60', '1.26', '1.01', '1.09', '1.65', '1.65', '1.73', '0.27', '0.38', '0.33']	0.914127
sp|P0AAF8|ARTP_ECO57	P0AAF8	Arginine transport ATP-binding protein ArtP OS=Escherichia coli O157:H7 GN=artP PE=3 SV=1	artP	0.738026			['0.53', '0.72', '0.73', '1.04', '0.83', '0.63']	0.729398	['0.85', '0.61', '0.79']	0.746757
sp|P00509|AAT_ECOLI	P00509	Aspartate aminotransferase OS=Escherichia coli (strain K12) GN=aspC PE=1 SV=1	aspC	0.978481	['2.69', '4.16', '2.91', '1.59', '1.96', '2.88', '2.23', '1.88', '1.24', '1.16', '1.29', '1.53', '1.39', '1.36', '3.38', '0.65', '0.38', '4.45', '0.90', '0.92', '0.62', '0.92', '5.18', '0.50', '1.11', '1.09', '1.06', '2.19', '13.01', '4.96', '0.31', '0.32', '1.74', '1.24', '0.85', '0.80', '0.82', '0.88', '0.76', '1.04', '1.04', '0.90', '0.91', '0.94', '0.86', '1.25', '0.94', '1.27', '0.95', '0.98…	1.18007	['8.71', '12.03', '8.44', '6.66', '6.89', '14.14', '0.79', '1.24', '0.77', '0.55', '0.53', '0.81', '0.70', '0.71', '0.63', '0.61', '1.02', '0.69', '0.85', '1.22', '0.42', '1.30', '1.36', '1.19', '0.24', '0.20', '0.28', '0.57', '1.33', '0.76', '0.87', '0.56', '0.80', '1.45', '1.52', '1.99', '0.67', '0.67', '0.76', '0.46', '0.69', '0.38', '0.91', '0.76', '0.69', '0.69', '0.90', '0.68', '0.86', '0.9…	1.05578	['0.25', '0.27', '0.24', '0.34', '0.33', '0.32', '0.57', '0.85', '0.65', '0.41', '0.88', '1.11', '0.68', '0.82', '0.93', '0.45', '0.50', '0.40', '0.68', '0.78', '0.93', '0.43', '0.19', '0.59', '2.24', '9.22', '1.74', '0.73', '0.70', '0.70', '0.85', '0.80', '1.32', '0.58', '0.36', '3.09', '0.71', '0.76', '1.55', '0.70', '0.49', '0.40', '0.77', '0.68', '0.93', '0.48', '0.71', '1.36', '0.63', '0.87'…	0.657224	['1.06', '1.08', '1.06', '0.83', '0.79', '0.81', '0.81', '0.77', '0.82', '0.69', '0.68', '0.67', '0.92', '0.86', '0.97', '0.61', '0.87', '0.82', '4.00', '0.55', '1.17', '2.18', '1.86', '2.49', '2.08', '0.93', '1.45', '1.63', '0.55', '1.54', '0.81', '1.21', '0.36', '0.62', '1.52', '1.92', '1.63', '8.80', '6.60', '0.90', '0.97', '0.86', '0.96', '1.02', '0.75', '0.52', '0.20', '0.17', '1.17', '10.04…	1.11948
sp|B7USP3|SYD_ECO27	B7USP3	Aspartate--tRNA ligase OS=Escherichia coli O127:H6 (strain E2348/69 / EPEC) GN=aspS PE=3 SV=1	aspS	0.905868	['0.56', '0.66', '0.70', '0.65', '0.48', '0.75', '1.08', '0.90', '0.41', '0.53', '0.55', '0.78', '0.69', '0.66', '0.67', '0.62', '0.81', '1.07', '0.91', '0.88', '0.76', '0.66', '0.73', '0.85', '0.51', '0.21', '0.53', '1.02', '0.60', '0.62', '0.52', '0.45', '0.45', '1.00', '0.62', '0.72', '1.05', '1.16', '0.91', '0.91', '0.88', '1.03', '0.94', '1.40', '1.28', '1.25', '0.77', '2.22', '0.98', '0.96'…	0.795609	['0.84', '1.90', '0.85', '0.20', '0.90', '0.54', '1.18', '1.85', '0.61', '2.71', '2.68', '2.38', '0.84', '0.86', '0.95', '0.96', '0.89', '0.93', '1.19', '1.15', '1.19', '1.03', '1.06', '1.40', '0.52', '0.68', '0.64', '1.51', '0.92', '1.26', '1.33', '1.11', '1.33', '1.08', '0.86', '0.89', '0.98', '0.63', '0.99', '0.88', '1.13', '1.02', '0.89', '0.90', '0.54', '0.92', '2.05', '1.49', '2.44', '0.42'…	1.09577	['0.70', '0.58', '0.63', '0.69', '0.66', '0.29', '0.49', '0.46', '0.60', '1.49', '0.90', '0.48', '0.77', '0.68', '0.61', '0.15', '0.37', '0.62', '0.77', '0.79', '0.68', '5.15', '3.74', '2.36', '0.29', '0.34', '0.29', '0.50', '0.86', '0.59', '0.60', '0.34', '0.57', '0.23', '0.50', '0.22', '1.16', '1.06', '0.94', '0.65', '0.97', '0.64', '1.19', '0.58', '0.51', '1.15', '0.87', '1.10', '0.51', '0.64'…	0.654316	['0.96', '0.98', '0.90', '1.81', '1.67', '1.21', '1.35', '1.35', '1.15', '1.41', '1.22', '1.15', '1.56', '1.65', '1.17', '1.37', '0.77', '1.27', '0.93', '2.23', '3.34', '11.76', '1.67', '1.65', '1.65', '0.62', '0.73', '1.28', '1.22', '1.05', '1.36', '1.19', '1.96', '1.35', '1.20', '1.35', '1.91', '1.61', '1.64', '1.91', '0.35', '0.37', '0.86', '1.09', '1.07', '1.09', '1.12', '0.65', '0.44', '0.40…	1.18046
sp|A7ZTU6|ATPA_ECO24	A7ZTU6	ATP synthase subunit alpha OS=Escherichia coli O139:H28 (strain E24377A / ETEC) GN=atpA PE=3 SV=1	atpA	0.656239	['0.37', '0.37', '0.36', '0.36', '0.34', '0.38', '2.07', '0.59', '3.48', '0.56', '0.68', '0.52', '0.33', '0.39', '0.37', '0.40', '0.39', '0.38', '0.39', '0.46', '0.40', '0.22', '0.20', '0.43', '0.36', '0.34', '0.35', '0.33', '0.32', '0.37', '0.52', '0.43', '0.63', '0.52', '0.20', '0.10', '0.55', '0.54', '0.52', '0.31', '0.32', '0.31', '0.46', '0.44', '0.52', '0.30', '0.53', '0.54', '0.27', '0.23'…	0.418952	['0.93', '0.94', '0.96', '0.88', '0.95', '0.64', '1.11', '1.11', '0.41', '0.80', '0.92', '0.87', '0.91', '0.76', '0.74', '0.77', '0.79', '0.71', '1.09', '1.08', '0.76', '1.13', '1.21', '1.10', '0.96', '0.94', '0.96', '1.14', '1.22', '1.24', '1.55', '1.14', '1.18', '1.33', '1.45', '1.10', '1.56', '1.31', '1.17', '0.84', '0.87', '0.89', '0.71', '0.69', '0.72', '1.24', '1.44', '1.76', '1.34', '1.54'…	0.927171	['0.53', '0.48', '0.55', '0.50', '0.51', '0.85', '0.36', '0.59', '0.63', '0.57', '0.58', '0.55', '0.49', '0.57', '0.47', '0.50', '0.54', '0.54', '0.46', '0.54', '0.57', '1.06', '0.70', '0.88', '0.40', '0.38', '0.27', '0.44', '0.43', '0.26', '0.47', '0.57', '0.66', '0.41', '0.41', '0.49', '0.52', '0.51', '0.50', '0.58', '0.58', '0.58', '0.64', '0.31', '0.38', '0.30', '0.30', '0.40', '0.71', '0.65'…	0.517226	['0.93', '0.87', '1.01', '1.03', '1.31', '0.89', '1.05', '0.80', '0.59', '0.83', '0.62', '0.80', '0.80', '0.91', '0.79', '0.78', '0.79', '0.84', '1.35', '1.30', '1.16', '2.07', '1.56', '0.79', '1.12', '1.07', '1.13', '1.17', '1.17', '1.22', '6.23', '0.49', '0.61', '0.90', '0.79', '0.81', '2.04', '0.57', '0.89', '1.34', '1.37', '1.33', '1.20', '0.89', '0.85', '0.53', '0.78', '0.85', '1.19', '1.24'…	0.92309
sp|A7ZTU4|ATPB_ECO24	A7ZTU4	ATP synthase subunit beta OS=Escherichia coli O139:H28 (strain E24377A / ETEC) GN=atpD PE=3 SV=1	atpD	0.810672	['0.53', '0.76', '1.15', '0.98', '0.95', '1.49', '0.46', '0.47', '0.45', '0.49', '0.55', '0.50', '0.64', '0.60', '0.58', '0.63', '0.57', '0.41', '0.63', '0.37', '0.72', '1.09', '1.00', '0.65', '0.52', '0.70', '0.59', '0.65', '0.68', '0.99', '0.19', '0.27', '0.04', '0.45', '0.53', '0.47', '0.44', '0.54', '0.47', '0.39', '0.39', '0.36', '3.66', '4.14', '4.05', '0.80', '0.91', '0.51', '0.29', '0.32'…	0.556266	['2.60', '3.02', '2.70', '2.08', '2.03', '1.65', '0.82', '0.84', '0.83', '1.16', '1.11', '1.04', '1.17', '1.04', '1.08', '0.82', '0.66', '0.52', '3.20', '1.23', '2.36', '1.66', '1.41', '1.42', '0.92', '1.15', '0.88', '1.91', '1.82', '1.21', '0.73', '0.73', '0.78', '0.41', '0.53', '0.42', '0.65', '0.62', '0.61', '2.87', '2.87', '2.26', '1.56', '1.27', '1.57', '1.13', '1.58', '1.44', '0.53', '1.58'…	1.11496	['0.33', '0.31', '0.41', '0.45', '0.50', '0.55', '0.57', '0.55', '0.59', '7.59', '6.04', '104.48', '0.81', '0.66', '0.69', '0.56', '0.62', '0.50', '0.61', '0.66', '0.64', '0.50', '1.28', '0.48', '0.44', '0.47', '1.13', '0.61', '0.61', '0.56', '0.66', '0.73', '0.69', '0.64', '0.64', '0.81', '0.53', '1.02', '0.60', '1.32', '0.73', '0.28', '0.51', '1.05', '1.12', '0.49', '0.48', '0.50', '0.58', '0.5…	0.642463	['1.18', '1.52', '1.07', '1.14', '0.83', '0.66', '0.94', '0.94', '0.95', '1.99', '1.79', '2.08', '1.04', '0.42', '0.64', '1.17', '0.77', '0.62', '0.40', '0.52', '0.70', '1.21', '0.87', '1.19', '1.19', '1.16', '1.08', '1.20', '1.17', '1.32', '0.73', '0.58', '1.14', '1.17', '1.25', '1.00', '1.14', '1.34', '1.34', '0.65', '1.12', '0.96', '1.10', '1.17', '1.17', '1.58', '1.43', '1.25', '0.94', '0.93'…	1.0839
sp|A7ZTU5|ATPG_ECO24	A7ZTU5	ATP synthase gamma chain OS=Escherichia coli O139:H28 (strain E24377A / ETEC) GN=atpG PE=3 SV=1	atpG	0.785325	['0.89', '0.69', '1.05', '0.44', '0.52', '0.47', '0.36', '1.38', '0.54', '0.15', '0.17', '0.12', '0.46', '0.52', '0.46', '0.31', '0.49', '0.34', '0.72', '0.68', '0.68', '0.06', '0.66', '2.20', '0.69', '0.35', '1.03', '0.51', '0.40', '0.62', '0.69', '0.48', '0.50', '0.57', '1.59', '1.55', '0.40', '0.38', '0.39', '0.56', '0.52', '0.52', '0.48', '0.58', '0.41', '0.38', '0.37', '0.41', '0.57', '0.43'…	0.511698	['0.63', '0.45', '0.31', '0.72', '0.95', '0.71', '1.50', '0.37', '0.42', '0.80', '0.70', '0.65', '0.70', '0.74', '0.73', '1.04', '0.97', '1.20', '1.64', '1.55', '1.26', '0.69', '1.21', '0.72', '0.22', '1.29', '1.83', '11.37', '10.50', '10.58', '4.61', '5.15', '3.27', '2.35', '1.54', '1.37', '1.19', '0.80', '8.16', '1.04', '1.18', '1.46', '0.81', '0.83', '1.08', '0.81', '0.27', '1.20', '3.41', '0.…	1.10651	['0.60', '0.74', '0.72', '0.64', '0.99', '0.67', '1.40', '1.91', '2.49', '0.80', '0.81', '0.91', '1.08', '0.76', '0.84', '0.56', '0.58', '0.47', '0.35', '0.48', '0.36', '0.46', '0.31', '1.02', '1.34', '1.14', '0.02', '0.40', '0.41', '0.73', '0.79', '0.56', '0.46', '0.36', '0.40', '0.34', '0.53', '0.48', '0.40', '0.55', '0.55', '0.44', '0.57', '0.63', '0.52', '0.49', '0.52', '0.56', '0.52', '0.53'…	0.591426	['1.02', '1.24', '1.37', '0.35', '0.72', '0.88', '1.58', '1.04', '0.81', '11.91', '2.90', '2.14', '1.17', '1.63', '3.38', '0.95', '0.91', '0.95', '0.23', '0.13', '0.19', '1.42', '1.98', '1.17', '0.47', '0.62', '0.51', '2.16', '2.44', '3.36', '0.96', '0.81', '0.98', '0.98', '0.90', '0.64', '1.47', '0.94', '6.84', '0.96', '0.92', '1.26', '0.85', '0.89', '0.62', '1.12', '4.74', '3.36', '1.37', '1.47…	1.13586
sp|A7ZTU7|ATPD_ECO24	A7ZTU7	ATP synthase subunit delta OS=Escherichia coli O139:H28 (strain E24377A / ETEC) GN=atpH PE=3 SV=1	atpH	0.706296	['0.47', '0.66', '0.90', '0.76', '0.28', '0.53', '0.62', '0.29', '0.36', '0.43', '0.37', '0.50', '0.37', '0.46', '0.41', '0.93', '0.45', '0.86', '0.45', '0.70', '0.92', '0.51', '0.52', '0.52', '0.99', '1.54', '0.70', '0.60', '0.51', '0.65', '1.17', '1.53', '1.55', '0.48', '0.51', '2.03', '0.35', '0.36', '0.34', '0.30', '0.35', '1.57']	0.595632	['0.47', '0.40', '0.73', '0.74', '0.83', '0.74', '0.91', '1.08', '1.07', '1.35', '0.95', '1.45', '0.81', '0.53', '1.00', '1.10', '1.21', '1.18', '1.81', '1.74', '2.14', '0.77', '0.71', '0.71', '1.75', '1.85', '1.76', '1.16', '1.21', '1.19', '0.52', '2.29', '2.48', '1.32', '1.04', '0.57', '0.67', '0.71', '0.95', '1.01', '0.96', '0.06']	0.950528	['0.44', '0.29', '0.45', '0.50', '0.76', '0.97', '0.84', '0.73', '0.84', '2.27', '0.46', '2.10', '0.25', '0.46', '0.56', '0.65', '0.52', '0.60', '0.28', '0.22', '0.19', '0.26', '0.26', '0.25', '0.29', '0.32', '0.41', '0.46', '0.50', '0.48', '0.37', '0.53', '0.51', '0.70', '0.68', '0.98', '0.65', '0.76', '0.77', '0.51', '0.98', '1.64']	0.534336	['0.40', '0.27', '0.32', '1.61', '0.12', '0.97', '1.03', '0.89', '0.69', '0.39', '0.44', '0.46', '0.53', '0.49', '0.43', '0.98', '1.71', '0.94', '0.73', '0.93', '0.66', '0.20', '0.18', '0.21', '1.34', '2.40', '4.76', '0.99', '0.98', '1.02', '1.34', '1.52', '1.15', '0.70', '0.80', '0.91', '0.94', '1.35', '2.10', '1.51', '1.08', '0.73', '1.63', '1.64', '1.64', '1.09', '2.04', '0.80']	0.8226
sp|P0AE54|BCP_ECO57	P0AE54	Putative peroxiredoxin bcp OS=Escherichia coli O157:H7 GN=bcp PE=3 SV=1	bcp	0.929778	['0.60', '0.59', '0.56', '0.78', '0.83', '0.84', '2.09', '1.51', '1.54', '0.76', '0.80', '1.19', '0.99', '1.68', '1.87', '0.68', '1.30', '0.67', '0.63', '0.72', '0.70', '0.99', '0.89', '0.81']	0.925704	['1.69', '1.84', '1.79', '1.33', '1.31', '1.23', '1.10', '1.22', '1.22', '1.11', '1.15', '1.13', '1.00', '0.86', '1.29', '0.18', '0.08', '0.35', '0.84', '0.75', '1.44', '1.44', '1.64', '1.54', '1.40', '1.31', '1.19', '0.76', '0.88', '1.27', '0.59', '0.70', '1.45', '0.80', '1.01', '0.92', '2.63', '1.86', '2.21', '1.61', '1.73', '2.89']	1.08804	['0.60', '0.70', '0.64', '0.86', '0.92', '0.87', '0.77', '0.78', '0.85', '1.05', '0.93', '0.77', '0.88', '0.36', '0.84', '1.18', '0.83', '0.96', '0.82', '0.92', '1.27', '3.99', '0.88', '1.08', '0.25', '0.29', '0.34', '0.31', '0.32', '0.36', '0.56', '0.59', '0.96', '1.18', '0.98', '0.58', '0.98', '1.05', '0.99', '0.70', '0.64', '0.65', '1.41', '2.55', '0.56']	0.768649	['1.12', '1.16', '1.22', '1.18', '1.16', '1.13', '1.64', '1.55', '1.44', '1.43', '1.39', '1.16', '1.20', '1.76', '1.79', '1.97', '0.88', '2.21', '0.93', '0.79', '0.83', '1.41', '0.99', '1.06', '0.71', '0.55', '0.84', '0.66', '1.01', '0.40', '0.56', '0.58', '0.24', '1.39', '0.72', '0.69', '0.71', '0.28', '1.00']	0.965319
sp|P0A6F2|CARA_ECO57	P0A6F2	Carbamoyl-phosphate synthase small chain OS=Escherichia coli O157:H7 GN=carA PE=3 SV=1	carA	0.724372	['0.67', '1.12', '1.25', '0.81', '0.40', '0.55', '0.45', '0.50', '0.62', '0.33', '0.43', '2.66', '1.73', '0.24', '0.12', '0.81', '0.73', '1.09', '0.47', '0.36', '0.24', '0.37', '0.81', '0.28', '0.32', '0.38', '1.73', '0.41', '0.39', '0.45', '0.35', '1.72', '0.63', '0.51', '0.49', '0.35', '0.71', '0.67', '0.48', '0.50', '0.37', '0.59']	0.548122	['1.05', '1.37', '1.87', '0.80', '0.72', '0.72', '2.35', '2.45', '3.06', '0.90', '0.95', '1.23', '0.45', '0.47', '0.40', '0.77', '0.63', '1.33', '1.19', '1.00', '1.61', '0.92', '0.55', '0.63', '0.99', '1.02', '0.26', '0.64', '0.42', '1.05', '0.53', '0.53', '0.64', '0.56', '0.60', '0.59', '0.52', '0.54', '0.96', '0.97', '0.64', '0.44', '1.36', '1.40', '1.24', '0.93', '1.49', '0.93', '0.45', '0.64'…	0.807158	['0.75', '0.79', '1.09', '0.53', '0.50', '0.71', '0.47', '0.45', '0.44', '0.70', '0.22', '0.13', '4.72', '2.31', '4.42', '0.52', '0.42', '0.38', '0.82', '0.62', '0.42', '0.40', '0.38', '0.79', '0.45', '0.45', '0.43', '0.44', '0.38', '0.46', '0.29', '0.28', '0.40', '0.98', '0.24', '0.91', '0.55', '0.60', '0.65', '1.53', '0.65', '0.92', '0.43', '0.71', '0.60', '1.46', '1.36', '1.96', '0.53', '0.40'…	0.620886	['1.64', '1.33', '1.99', '0.04', '0.84', '0.97', '1.52', '1.62', '2.78', '0.89', '0.82', '1.22', '0.56', '1.33', '15.73', '1.40', '1.34', '1.06', '0.72', '0.58', '0.85', '3.04', '0.88', '0.71', '0.46', '0.84', '1.64', '0.79', '0.77', '1.01', '1.21', '1.06', '1.05', '1.62', '1.64', '1.95', '1.14', '0.97', '0.98', '1.36', '1.08', '1.38', '0.74', '0.81', '0.77', '0.97', '0.78', '0.95', '0.78', '0.88…	1.00231
sp|P63737|CARB_ECO57	P63737	Carbamoyl-phosphate synthase large chain OS=Escherichia coli O157:H7 GN=carB PE=3 SV=2	carB	0.758084	['0.47', '0.58', '0.45', '0.91', '5.04', '0.37', '0.43', '0.71', '0.42', '0.89', '1.04', '1.23', '0.66', '0.53', '0.70', '0.63', '0.66', '0.56', '0.56', '0.40', '0.48', '0.57', '0.49', '0.61', '0.54', '0.48', '0.45', '0.74', '0.82', '0.29', '0.69', '0.35', '0.36', '0.69', '0.57', '0.53', '0.84', '0.68', '0.77', '0.71', '0.80', '0.73', '0.56', '0.50', '0.62', '0.58', '0.57', '0.82', '0.90', '1.03'…	0.663406	['1.15', '1.49', '1.68', '3.16', '3.48', '3.27', '1.55', '0.25', '0.29', '0.54', '0.77', '0.69', '0.60', '0.71', '0.54', '1.65', '1.53', '1.53', '4.80', '0.94', '1.37', '0.98', '1.41', '1.32', '0.62', '0.86', '0.97', '2.04', '0.87', '1.35', '0.38', '0.62', '0.66', '0.54', '0.37', '0.68', '0.70', '0.92', '1.11', '0.30', '0.97', '0.84', '0.70', '0.75', '0.54', '0.35', '3.67', '2.35', '2.84', '3.85'…	0.94297	['0.65', '0.66', '0.73', '0.31', '0.22', '0.29', '0.18', '0.20', '0.19', '0.42', '0.45', '0.48', '0.80', '1.57', '0.93', '0.46', '0.91', '1.15', '0.50', '3.70', '2.07', '0.53', '0.16', '0.67', '0.47', '1.21', '0.95', '0.37', '0.36', '0.36', '0.51', '0.48', '0.49', '0.51', '0.71', '0.53', '0.25', '0.29', '0.30', '0.25', '0.23', '0.25', '0.31', '0.26', '0.35', '0.47', '0.52', '1.32', '0.39', '1.10'…	0.619267	['0.81', '0.70', '0.82', '0.75', '0.73', '0.74', '0.70', '0.74', '0.80', '0.62', '0.62', '0.58', '0.72', '0.57', '0.63', '1.13', '0.63', '0.36', '0.66', '0.67', '0.62', '1.00', '1.44', '5.15', '1.20', '0.73', '1.45', '1.09', '0.99', '0.45', '0.67', '0.67', '0.25', '0.96', '0.99', '0.88', '1.20', '1.55', '2.02', '0.71', '0.83', '0.85', '0.92', '0.97', '0.94', '1.49', '1.30', '1.24', '0.69', '0.66'…	0.852541
sp|A7ZKA5|CBPA_ECO24	A7ZKA5	Curved DNA-binding protein OS=Escherichia coli O139:H28 (strain E24377A / ETEC) GN=cbpA PE=3 SV=1	cbpA	0.846843	['0.55', '0.59', '0.60', '0.51', '0.51', '0.65', '0.43', '0.22', '0.13', '3.74', '3.02', '2.31', '1.15', '0.79', '2.55', '1.12', '2.85', '1.48', '0.76', '0.49', '0.47', '12.52', '34.73', '2.36', '1.07', '1.06', '1.40', '1.04', '1.04', '1.10', '0.94', '0.73', '0.71', '0.51', '0.48', '0.45', '0.39', '0.19', '0.54', '1.09', '0.77', '0.72', '0.87', '0.91', '0.74']	0.925483	['0.91', '1.05', '0.89', '1.07', '1.34', '1.08', '0.41', '0.31', '0.50', '1.55', '0.78', '1.43', '0.81', '0.94', '1.03', '0.57', '1.10', '0.84', '4.09', '3.30', '2.34', '2.03', '1.98', '1.77', '0.59', '0.62', '0.65', '0.46', '0.43', '0.62', '0.70', '0.27', '1.26', '1.01', '0.89', '0.73', '2.22', '1.11', '0.85']	0.949164	['0.74', '0.91', '0.82', '0.67', '8.87', '1.07', '0.89', '1.57', '0.91', '0.46', '0.31', '0.27', '0.12', '0.07', '0.10', '0.16', '0.16', '0.16', '0.24', '0.33', '0.57', '0.83', '0.52', '0.42', '0.58', '0.44', '0.42']	0.452659	['0.73', '0.84', '0.42', '0.88', '0.75', '0.88', '1.37', '0.38', '3.92', '1.88', '1.44', '2.25', '1.18', '1.40', '1.09', '24.06', '7.47', '4.56', '0.84', '1.33', '1.46', '1.75', '1.89', '1.76', '1.27', '1.10', '1.07', '0.93', '0.92', '0.96', '2.25', '1.81', '1.68', '0.45', '0.77', '1.18', '0.78', '0.85', '0.84', '1.16', '1.45', '1.17', '0.84', '1.24', '1.01']	1.29339
sp|P0AEW5|CPDA_ECO57	P0AEW5	3',5'-cyclic adenosine monophosphate phosphodiesterase CpdA OS=Escherichia coli O157:H7 GN=cpdA PE=3 SV=1	cpdA	1.14615	['1.18', '1.21', '1.34']	1.23997			['0.77', '1.22', '1.98', '1.28', '0.86', '0.70']	1.05944
sp|A7ZHZ9|CRL_ECO24	A7ZHZ9	Sigma factor-binding protein crl OS=Escherichia coli O139:H28 (strain E24377A / ETEC) GN=crl PE=3 SV=1	crl	1.23516	['0.62', '1.36', '0.79', '1.36', '1.50', '0.85', '0.89', '1.05', '0.83', '0.93', '1.13', '0.94']	0.990153	['1.12', '1.57', '1.64', '1.35', '1.55', '1.16', '2.94', '1.85', '1.93', '1.37', '1.38', '1.21', '0.39', '1.60', '4.64', '1.79', '1.13', '0.68', '2.24', '2.94', '1.68', '1.14', '0.58', '2.37']	1.47684	['0.47', '1.62', '1.23', '1.40', '1.37', '0.94', '1.14', '0.78', '0.62', '1.56', '1.40', '1.48', '2.03', '1.79', '1.66', '0.70', '0.61', '0.64', '1.28', '0.46', '0.70', '0.69', '0.87', '0.52', '0.86', '0.78', '0.78']	0.961111	['3.15', '4.39', '3.15', '1.81', '1.74', '3.64', '0.96', '1.53', '1.37', '2.07', '0.91', '1.04', '1.38', '0.93', '0.76']	1.65608
sp|P0ACK0|CRP_ECO57	P0ACK0	Catabolite gene activator OS=Escherichia coli O157:H7 GN=crp PE=1 SV=1	crp	0.874027	['0.70', '0.61', '0.88', '0.36', '0.55', '0.43', '0.55', '0.61', '0.76', '0.67', '0.67', '0.63', '0.61', '0.72', '0.51', '0.81', '0.65', '0.75', '0.49', '0.28', '0.46', '0.30', '1.20', '1.31', '2.40', '1.14', '2.37', '1.37', '1.42', '1.35']	0.735796	['0.81', '0.80', '0.86', '0.86', '0.85', '0.70', '10.74', '4.13', '3.88', '1.45', '1.33', '1.54', '0.87', '1.19', '1.37', '0.97', '0.93', '0.96', '1.03', '1.03', '1.14', '0.85', '0.67', '1.39', '0.64', '0.79', '0.54', '0.36', '0.44', '0.39', '0.64', '0.77', '0.87', '0.62', '0.36', '0.33', '0.75', '0.85', '0.72']	0.922595	['0.70', '0.33', '0.54', '0.27', '0.33', '0.36', '0.68', '0.62', '0.69', '0.53', '0.59', '0.52', '0.87', '0.93', '0.52', '0.62', '0.47', '0.51', '1.14', '1.51', '2.00', '0.49', '1.05', '0.82', '0.56', '0.33', '0.97', '1.26', '0.68', '1.98', '0.51', '0.56', '0.46']	0.650993	['0.93', '0.82', '1.16', '1.49', '1.49', '1.26', '0.47', '0.90', '0.97', '1.64', '1.43', '1.71', '1.29', '1.27', '1.27', '5.93', '1.84', '1.59', '2.64', '2.97', '1.76', '1.20', '3.30', '0.97', '1.41', '1.45', '1.84', '1.47', '0.28', '0.34']	1.32055
sp|P69784|PTGA_ECOL6	P69784	Glucose-specific phosphotransferase enzyme IIA component OS=Escherichia coli O6:H1 (strain CFT073 / ATCC 700928 / UPEC) GN=crr PE=3 SV=2	crr	0.982622	['0.75', '0.74', '0.84', '0.91', '0.96', '0.86', '0.61', '0.62', '0.55', '1.21', '1.28', '2.28', '0.35', '0.60', '2.32', '1.35', '0.84', '0.40', '1.36', '0.75', '0.74', '1.22', '1.24', '0.97', '0.95', '0.95', '0.80', '0.94', '1.27', '0.90', '0.72', '0.55', '0.71', '0.78', '0.56', '0.82', '0.74', '0.82', '0.62', '0.67', '0.77', '0.81', '0.72', '0.70', '0.72', '0.89', '0.57', '0.45', '0.80', '0.82'…	0.796872	['1.00', '0.97', '1.00', '0.79', '0.82', '0.80', '0.79', '0.80', '0.79', '2.16', '2.19', '0.99', '1.49', '1.53', '3.61', '0.73', '0.70', '1.18', '0.41', '0.82', '1.76', '3.77', '2.06', '2.23', '4.43', '4.34', '2.94', '0.80', '0.89', '0.70', '0.62', '0.70', '2.63', '1.61', '1.71', '1.63', '1.25', '1.28', '1.30', '1.92', '1.84', '1.87', '2.73', '1.26', '3.12', '1.12', '1.14', '1.14', '0.86', '0.96'…	1.32026	['0.58', '0.61', '0.66', '0.41', '0.46', '0.52', '0.62', '1.58', '0.38', '2.32', '1.18', '0.73', '1.39', '1.31', '1.39', '1.35', '1.39', '1.42', '1.46', '1.50', '1.44', '1.96', '1.66', '2.64', '1.97', '0.21', '0.87', '1.30', '0.94', '1.21', '1.26', '0.86', '1.05', '0.76', '0.85', '0.69', '0.77', '0.61', '0.36', '0.65', '0.80', '0.45', '1.11', '0.72', '0.40', '1.52', '1.32', '7.62', '0.62', '0.97'…	0.962507	['0.89', '0.83', '0.70', '0.84', '0.90', '1.17', '0.59', '0.26', '0.33', '1.87', '0.58', '0.50', '1.61', '1.34', '1.39', '1.33', '1.34', '1.13', '1.44', '1.19', '0.56', '4.88', '2.57', '4.73', '1.61', '0.85', '0.59', '0.41', '0.38', '0.93', '0.63', '0.39', '0.39', '0.54', '0.54', '0.51', '1.13', '1.09', '1.12', '0.71', '0.86', '0.92', '1.40', '1.08', '1.13', '1.11', '0.97', '0.79', '0.29', '0.94'…	0.920653
sp|P0A9Y8|CSPC_ECO57	P0A9Y8	Cold shock-like protein CspC OS=Escherichia coli O157:H7 GN=cspC PE=3 SV=2	cspC	0.965393	['0.64', '0.65', '0.64', '0.66', '0.75', '0.87', '0.88', '0.80', '0.91', '0.41', '0.47', '0.04', '0.56', '0.59', '0.64', '0.67', '0.24', '0.76', '0.92', '0.98', '1.22', '0.29', '0.72', '2.16', '0.60', '0.56', '0.56']	0.607211	['1.54', '1.55', '1.56', '0.75', '0.89', '0.60', '2.16', '2.30', '2.25', '1.95', '1.94', '1.91', '1.41', '1.39', '0.11', '1.66', '1.59', '1.55', '1.53', '1.46', '1.46', '3.50', '3.48', '2.72', '3.27', '1.75', '2.82', '1.21', '1.18', '1.24']	1.52588	['1.05', '1.22', '1.06', '1.17', '1.16', '1.16', '0.72', '0.53', '0.60', '0.80', '0.83', '0.87', '1.59', '1.58', '1.53', '1.95', '1.94', '1.96', '0.53', '0.52', '0.53', '0.51', '0.69', '0.43', '1.22', '1.18', '1.31']	0.96078	['2.30', '2.07', '2.24', '1.28', '1.28', '1.74', '2.67', '2.73', '1.33', '0.58', '0.43', '0.80', '0.27', '0.10', '0.30', '1.26', '0.97', '1.10']	0.975737
sp|P76113|CURA_ECOLI	P76113	NADPH-dependent curcumin reductase OS=Escherichia coli (strain K12) GN=curA PE=1 SV=3	curA	0.901809	['1.28', '1.44', '0.94']	1.19782	['0.83', '1.58', '1.16', '1.22', '0.62', '0.94', '0.38', '1.31', '1.14', '1.21', '2.16', '1.04', '0.75', '1.26', '0.74', '0.80', '1.69', '1.01', '1.28', '2.11', '1.48', '1.70', '1.02', '1.41']	1.12117	['0.10', '0.14', '0.18', '0.55', '1.13', '0.73', '0.72', '0.94', '2.04']	0.489306	['1.30', '0.60', '1.20', '1.31', '0.99', '1.73', '1.86', '0.72', '1.22', '0.85', '0.69', '0.64', '0.48', '0.60', '0.62', '1.08', '0.96', '0.33', '1.38', '1.24', '1.46', '1.18', '1.07', '1.21', '1.24', '0.98', '0.85', '1.09', '0.75', '1.74', '1.21', '1.58', '1.45']	1.00651
sp|A7ZQK7|CYSJ_ECO24	A7ZQK7	Sulfite reductase [NADPH] flavoprotein alpha-component OS=Escherichia coli O139:H28 (strain E24377A / ETEC) GN=cysJ PE=3 SV=1	cysJ	1.02397	['0.53', '0.60', '0.71', '0.98', '1.10', '0.52', '1.15', '1.13', '1.40', '1.24', '0.48', '0.35', '0.29', '0.28', '0.33', '5.61', '3.16', '0.92', '0.39', '1.47', '8.49', '1.52', '1.49', '1.68', '1.02', '1.36', '1.24', '1.05', '1.40', '1.01']	0.999674	['1.26', '0.69', '1.17', '1.12', '0.95', '1.14', '2.37', '1.93', '1.95', '1.87', '0.83', '0.65', '1.47', '1.36', '1.31', '0.86', '1.16', '0.88', '1.15', '0.95', '1.01', '2.78', '1.36', '0.84', '2.43', '3.04', '3.41', '1.22', '1.52', '0.89', '3.20', '1.59', '1.11', '1.06', '0.80', '0.78', '0.68', '0.68', '0.55']	1.23285	['0.33', '1.21', '0.36', '1.30', '1.13', '1.24', '1.38', '0.63', '1.12', '1.14', '0.78', '1.32', '1.30', '1.40', '1.76', '1.04', '0.93', '0.55']	0.963466	['0.68', '0.65', '0.61', '1.42', '0.65', '0.56', '0.58', '0.83', '0.91', '1.62', '0.71', '0.69', '1.10', '0.85', '1.59', '1.02', '0.71', '1.71', '0.67', '0.75', '1.98', '1.01', '0.90', '0.84', '2.71', '1.48', '4.10', '0.92', '0.84', '0.74', '0.77', '0.87', '2.04', '0.77', '0.70', '0.76', '0.64', '0.32', '0.27', '1.16', '1.33', '1.01', '1.08', '0.88', '0.85', '0.88', '0.98', '1.12']	0.925872
sp|P0ABK6|CYSK_ECO57	P0ABK6	Cysteine synthase A OS=Escherichia coli O157:H7 GN=cysK PE=3 SV=2	cysK	0.726408	['0.67', '0.55', '0.46', '0.73', '0.75', '0.68', '0.58', '0.50', '0.59', '1.40', '0.54', '1.00', '0.54', '0.57', '0.55', '0.62', '0.61', '0.73', '1.14', '0.73', '2.53', '0.68', '0.67', '0.67', '0.75', '0.67', '0.78', '0.64', '0.63', '0.63', '0.91', '0.52', '0.56', '0.51', '0.58', '0.75', '0.77', '0.84', '0.88', '0.68', '0.68', '0.69', '0.62', '0.67', '0.63', '0.50', '0.49', '0.50', '0.68', '0.72'…	0.721064	['1.41', '0.65', '1.13', '0.52', '0.53', '0.30', '0.52', '0.49', '0.77', '0.79', '0.60', '1.03', '0.59', '0.38', '0.30', '0.52', '0.52', '0.31', '1.44', '1.17', '0.45', '0.75', '0.71', '0.70', '0.55', '0.98', '0.56', '0.81', '0.77', '0.90', '0.32', '0.42', '0.50', '1.63', '1.60', '1.46', '0.41', '0.36', '0.54', '0.65', '0.67', '0.66', '0.74', '0.77', '0.78', '0.54', '0.56', '0.47', '4.72', '3.82'…	0.789686	['0.52', '0.41', '1.14', '1.03', '1.48', '2.16', '0.71', '0.46', '0.70', '0.50', '0.61', '0.55', '0.72', '0.44', '0.61', '0.55', '16.71', '0.46', '0.52', '0.49', '1.19', '0.53', '0.62', '0.78', '0.42', '0.41', '0.40', '0.37', '0.55', '0.53', '0.45', '0.37', '0.46', '1.08', '0.36', '0.72', '0.37', '0.38', '0.40', '0.50', '0.56', '0.44', '1.16', '2.67', '0.77', '0.84', '0.75', '0.67', '0.60', '0.81…	0.573373	['0.79', '0.56', '0.71', '0.59', '0.57', '0.52', '3.42', '2.50', '5.29', '0.64', '0.67', '0.50', '0.47', '0.53', '0.55', '0.92', '0.77', '1.15', '0.59', '0.59', '0.40', '1.32', '1.27', '0.71', '0.99', '0.76', '0.64', '0.67', '1.11', '0.83', '0.89', '0.84', '1.10', '0.93', '1.75', '1.11', '0.97', '0.88', '0.86', '8.74', '0.66', '5.68', '0.72', '1.27', '0.67', '1.04', '1.02', '1.00', '0.64', '0.69'…	0.852817
sp|B7UKK3|SYC_ECO27	B7UKK3	Cysteine--tRNA ligase OS=Escherichia coli O127:H6 (strain E2348/69 / EPEC) GN=cysS PE=3 SV=1	cysS	0.878258	['0.49', '0.11', '0.30', '0.44', '0.40', '0.32', '0.97', '0.73', '1.44', '0.64', '0.33', '0.84', '1.10', '0.93', '0.95', '0.52', '0.50', '0.43', '0.72', '0.69', '1.00', '1.29', '1.37', '1.15', '1.31', '0.84', '1.05']	0.669705	['1.50', '1.52', '1.38', '0.65', '0.36', '0.38', '0.99', '0.56', '0.53', '1.35', '1.39', '1.98', '1.29', '1.14', '0.92', '1.34', '0.63', '1.00', '0.53', '0.55', '1.03', '0.91', '0.66', '0.46', '1.46', '1.40', '1.29', '0.64', '0.59', '1.11', '0.83', '0.69', '1.00', '1.69', '1.23', '1.49', '0.89', '0.71', '0.89']	0.915097	['0.65', '1.05', '1.25', '1.24', '0.70', '0.69', '0.71', '0.75', '0.97', '0.82', '0.75', '1.23', '0.63', '0.56', '0.95', '0.61', '5.47', '6.41', '0.28', '0.41', '0.61', '0.47', '0.49', '0.51', '0.54', '0.54', '1.03', '1.18', '1.26', '0.90', '0.28', '0.47', '12.60', '1.16', '1.21', '1.16']	0.885269	['1.43', '1.26', '1.38', '1.14', '0.95', '1.02', '0.70', '0.93', '0.77', '0.78', '1.80', '1.76', '1.24', '1.31', '1.46', '0.62', '1.03', '1.22', '1.76', '1.54', '2.40', '0.47', '0.63', '0.43', '0.97', '0.83', '1.70', '1.66', '1.35', '1.03', '2.36', '1.17', '1.29', '0.81', '0.76', '0.77']	1.09664
sp|A7ZHQ6|DAPD_ECO24	A7ZHQ6	2,3,4,5-tetrahydropyridine-2,6-dicarboxylate N-succinyltransferase OS=Escherichia coli O139:H28 (strain E24377A / ETEC) GN=dapD PE=3 SV=1	dapD	0.851634	['0.57', '0.60', '0.59', '0.50', '0.84', '0.91', '0.70', '0.62', '0.46', '0.73', '0.67', '0.73', '0.85', '0.88', '1.00', '0.88', '0.85', '0.93', '1.11', '0.48', '3.62', '1.64', '0.95', '1.64', '1.28', '1.48', '1.67', '0.94', '1.06', '0.83', '2.23', '0.50', '0.27', '0.47', '0.43', '0.35', '0.69', '0.67', '0.74', '1.04', '1.07', '0.90', '0.75', '0.94', '1.05', '0.85', '0.82', '1.26']	0.835345	['1.07', '1.08', '1.11', '0.69', '0.63', '0.64', '0.57', '0.93', '1.49', '0.84', '0.67', '0.75', '1.48', '0.95', '0.99', '1.00', '1.06', '0.95', '0.79', '0.67', '0.73', '3.24', '4.49', '3.91', '1.49', '1.20', '1.08', '0.79', '0.89', '0.78', '0.64', '0.53', '0.34', '0.74', '0.87', '0.87', '1.13', '1.52', '0.60', '0.28', '0.37', '0.33', '1.08', '1.40', '1.95', '0.64', '0.55', '0.51', '0.72', '1.10'…	0.901405	['0.47', '0.38', '0.31', '0.50', '0.53', '0.44', '0.11', '0.08', '0.35', '0.78', '0.59', '0.85', '0.34', '0.36', '0.35', '0.48', '0.58', '0.48', '0.63', '0.82', '0.94', '0.54', '0.66', '0.79', '0.61', '0.66', '0.58', '0.99', '0.66', '1.14', '3.58', '1.49', '0.91', '0.72', '0.75', '0.56', '1.33', '1.62', '1.37', '1.58', '0.95', '1.82', '0.71', '1.14', '0.66', '0.49', '0.58', '0.39', '0.52', '0.59'…	0.617692	['0.99', '1.06', '1.06', '1.34', '0.74', '1.28', '0.91', '0.67', '0.87', '1.10', '1.18', '0.87', '1.79', '1.91', '2.11', '1.37', '1.35', '1.44', '1.08', '1.03', '1.09', '0.32', '0.36', '1.18', '0.21', '1.63', '1.17', '1.32', '1.64', '0.89', '0.82', '0.79', '0.76', '0.32', '0.98', '1.02', '1.42', '1.21', '1.85', '2.15', '3.01', '2.44', '1.85', '2.01', '1.33', '0.83', '0.84', '0.88', '1.94', '1.41'…	1.13098
sp|A7ZVS6|DEOB_ECO24	A7ZVS6	Phosphopentomutase OS=Escherichia coli O139:H28 (strain E24377A / ETEC) GN=deoB PE=3 SV=1	deoB	1.06629	['0.91', '1.10', '0.67', '1.49', '1.14', '1.15', '1.05', '6.50', '6.93', '0.87', '1.38', '0.68', '0.59', '0.62', '0.58', '1.42', '0.66', '1.51', '0.47', '0.51', '0.99', '0.90', '0.89', '0.69', '1.52', '1.37', '0.68', '1.54', '1.61', '1.21', '0.98', '0.73', '0.96', '1.73', '0.99', '0.99', '1.03', '0.84', '0.76', '2.14', '2.54', '2.22']	1.10924	['1.10', '0.84', '0.80', '1.51', '1.44', '1.32', '1.30', '1.28', '1.17', '1.07', '0.98', '0.61', '1.82', '15.51', '17.51', '1.16', '1.00', '0.90', '1.32', '0.85', '1.00', '0.86', '0.59', '0.95', '1.14', '0.92', '1.36', '0.86', '1.36', '3.12', '1.60', '2.96', '2.03', '0.85', '0.69', '0.26', '0.85', '1.02', '0.37', '1.27', '1.26', '0.95', '0.96', '0.39', '0.26', '1.04', '0.87', '0.17', '1.48', '1.5…	1.04481	['0.93', '25.76', '26.66', '0.58', '6.70', '7.03', '0.74', '0.50', '0.29', '0.63', '0.58', '0.61', '0.51', '0.72', '0.58', '1.43', '1.00', '0.38', '0.93', '0.96', '0.96', '0.58', '0.68', '0.79', '0.99', '0.60', '1.47', '1.18', '1.78', '1.28', '0.63', '1.21', '1.06', '0.56', '0.35', '0.73', '2.66', '2.72', '0.87', '0.58', '1.65', '0.83', '1.17', '0.82', '0.52', '0.53', '0.63', '0.39', '0.66', '0.5…	1.02155	['0.91', '1.04', '1.09', '1.09', '1.18', '1.04', '1.09', '2.52', '1.79', '2.13', '1.19', '0.92', '1.44', '1.13', '0.98', '0.79', '1.03', '0.96', '1.01', '0.95', '1.08', '1.40', '1.57', '1.94', '0.90', '1.50', '0.94', '0.89', '1.53', '0.79', '1.19', '0.94', '0.72', '0.85', '0.96', '1.10', '0.71', '0.87', '0.75', '1.13', '1.13', '0.98', '0.91', '0.49', '0.64', '0.63', '0.66', '0.67', '0.52', '0.52'…	1.09188
sp|Q8XBT6|DKGA_ECO57	Q8XBT6	2,5-diketo-D-gluconic acid reductase A OS=Escherichia coli O157:H7 GN=dkgA PE=3 SV=1	dkgA	1.03719	['0.87', '1.11', '0.88', '1.59', '1.22', '1.87', '1.25', '1.08', '0.54', '1.37', '1.38', '1.72', '1.24', '1.54', '1.35', '1.87', '1.37', '6.20', '1.10', '0.99', '0.96', '1.60', '1.16', '0.46', '0.63', '0.63', '0.98', '0.84', '0.87', '1.06', '0.74', '0.77', '0.39', '1.16', '1.21', '1.50', '1.13', '1.24', '1.11', '0.71', '0.91', '1.05', '0.75', '0.79', '0.86', '2.06', '1.30', '0.55']	1.07335	['3.44', '4.61', '4.17', '1.44', '2.54', '1.38', '1.73', '1.63', '1.30', '0.83', '0.73', '0.76', '1.87', '2.86', '2.24', '1.29', '1.39', '1.57', '1.29', '1.66', '0.95', '0.99', '1.60', '1.47', '1.08', '0.32', '0.04', '1.12', '1.73', '1.62', '1.39', '1.44', '1.48', '1.31', '1.31', '0.90', '1.05', '1.14', '1.72', '1.84', '1.80', '0.80', '1.37', '1.63', '1.15', '1.23', '0.86', '0.89', '1.18', '1.13'…	1.19362	['0.45', '0.61', '0.66', '0.38', '0.76', '0.53', '0.88', '1.07', '0.76', '1.04', '1.00', '0.98', '1.09', '1.06', '0.94', '0.27', '1.75', '3.36', '0.26', '0.94', '1.32', '0.82', '1.00', '0.59', '1.14', '0.99', '1.90', '0.82', '0.72', '0.85', '0.49', '0.81', '0.91', '0.83', '0.62', '1.79', '5.97', '0.35', '0.43', '0.75', '0.72', '0.78', '0.70', '0.83', '0.59', '1.19', '1.11', '1.42', '1.07', '1.12'…	0.920747	['0.83', '0.93', '0.99', '0.03', '0.90', '0.14', '2.26', '1.53', '2.09', '0.97', '0.68', '1.11', '0.64', '0.67', '0.11', '2.42', '1.88', '1.47', '2.16', '1.54', '1.95', '0.78', '0.35', '0.69', '0.86', '0.80', '0.68', '1.30', '1.02', '1.18', '1.22', '0.91', '0.99', '1.27', '1.34', '2.58', '1.26', '1.25', '1.17', '0.48', '1.22', '0.59', '1.20', '1.44', '2.41', '0.87', '1.24', '2.08', '1.58', '1.24'…	0.981035
sp|Q8X7Z7|DKGB_ECO57	Q8X7Z7	2,5-diketo-D-gluconic acid reductase B OS=Escherichia coli O157:H7 GN=dkgB PE=3 SV=1	dkgB	0.862287	['0.53', '0.67', '0.97', '1.20', '0.74', '0.48']	0.725842	['1.11', '1.35', '1.41', '1.99', '1.85', '0.91', '0.79', '0.92', '3.11', '1.06', '4.34', '4.62', '1.02', '1.10', '1.06']	1.49328	['0.84', '0.91', '0.49', '1.19', '0.45', '0.99', '0.13', '0.13', '0.14', '0.89', '2.72', '3.70', '0.50', '0.98', '0.93']	0.655053	['0.60', '1.35', '1.09', '2.97', '0.15', '0.29', '0.83', '1.22', '1.37', '1.20', '0.56', '0.48']	0.778661
sp|P0ABS3|DKSA_ECO57	P0ABS3	DnaK suppressor protein OS=Escherichia coli O157:H7 GN=dksA PE=3 SV=1	dksA	0.906706	['0.64', '0.97', '0.86', '0.68', '0.81', '0.67', '0.24', '3.44', '0.63', '0.78', '0.86', '0.82', '0.43', '0.50', '0.43', '0.56', '0.55', '0.67', '0.63', '0.64', '1.00', '0.65', '0.63', '0.85', '0.36', '0.37', '0.79', '3.24', '1.21', '1.63', '1.22', '0.95', '1.00', '0.73', '0.82', '0.59', '1.04', '0.33', '0.70', '0.53', '0.53', '0.56']	0.727751	['1.13', '1.57', '0.89', '1.72', '2.25', '2.05', '0.77', '1.23', '1.10', '0.95', '0.48', '0.51', '2.53', '2.09', '1.92', '1.30', '1.27', '1.29', '1.09', '1.12', '1.10', '1.61', '1.63', '1.36', '1.43', '1.11', '0.81', '1.04', '0.94', '1.16', '2.73', '0.52', '1.17', '0.54', '0.64', '0.81', '1.68', '0.98', '1.73', '0.97', '0.77', '0.47', '1.47', '0.92', '0.29']	1.10375	['1.26', '1.03', '1.93', '0.60', '0.66', '0.74', '0.80', '0.43', '0.84', '0.87', '1.58', '0.97', '0.33', '0.26', '0.23', '0.67', '0.60', '0.64', '0.90', '0.93', '0.84', '1.08', '0.67', '1.37', '0.89', '0.86', '0.80', '1.33', '0.82', '1.08', '0.68', '1.23', '2.02', '0.76', '0.43', '1.15', '0.59', '0.43', '0.98', '0.57', '0.54', '0.76', '0.66', '0.63', '0.58', '0.60', '0.69', '0.83']	0.763668	['1.26', '1.63', '0.98', '0.90', '0.72', '1.14', '0.47', '1.02', '0.61', '0.80', '0.79', '0.90', '0.96', '1.14', '1.09', '0.80', '0.79', '0.88', '0.72', '2.49', '0.55', '1.67', '1.76', '1.13', '1.21', '1.40', '1.35', '0.79', '0.63', '0.83', '1.11', '0.86', '1.07', '1.68', '3.42', '2.90', '0.84', '2.12', '2.88']	1.10182
sp|P0ABS6|PRIM_ECO57	P0ABS6	DNA primase OS=Escherichia coli O157:H7 GN=dnaG PE=3 SV=1	dnaG	1.19212			['0.89', '0.78', '1.07']	0.905721			['0.73', '2.10', '0.68', '1.38', '2.46', '2.14', '2.06', '1.58', '2.34']	1.56907
sp|A7ZHA4|DNAK_ECO24	A7ZHA4	Chaperone protein DnaK OS=Escherichia coli O139:H28 (strain E24377A / ETEC) GN=dnaK PE=3 SV=1	dnaK	0.772503	['1.02', '0.95', '0.90', '1.09', '1.08', '1.03', '2.07', '1.48', '1.24', '1.66', '1.72', '1.84', '1.09', '1.07', '0.98', '1.24', '1.28', '1.23', '0.42', '0.50', '0.84', '0.48', '0.52', '0.44', '0.58', '0.55', '0.61', '0.81', '0.60', '0.69', '0.78', '0.76', '0.80', '0.72', '0.74', '0.99', '0.72', '0.68', '0.47', '1.18', '1.92', '1.39', '1.43', '1.58', '1.39', '4.04', '4.02', '4.28', '0.67', '0.73'…	0.922674	['1.24', '1.26', '1.25', '0.86', '0.87', '0.96', '0.99', '1.06', '1.29', '0.44', '0.45', '0.46', '0.56', '0.75', '0.77', '0.90', '0.92', '0.99', '0.46', '1.02', '1.31', '0.55', '0.50', '0.57', '0.41', '0.34', '1.23', '0.82', '0.72', '0.79', '0.50', '0.54', '0.54', '0.83', '0.46', '0.70', '0.53', '0.54', '0.58', '0.65', '0.93', '1.15', '0.24', '1.00', '0.11', '0.50', '0.50', '0.51', '0.46', '0.52'…	0.685772	['0.28', '0.31', '0.31', '0.45', '0.45', '0.46', '0.25', '0.61', '0.84', '0.54', '0.57', '0.67', '0.53', '0.65', '0.47', '0.65', '0.50', '0.63', '0.93', '1.08', '1.10', '0.65', '0.64', '0.77', '0.69', '0.88', '1.13', '0.59', '0.65', '0.69', '1.12', '0.75', '0.72', '0.83', '0.80', '0.86', '0.96', '0.33', '0.74', '0.85', '0.84', '0.83', '0.79', '0.83', '0.80', '0.73', '0.21', '0.16', '0.59', '0.56'…	0.696042	['1.04', '0.20', '0.80', '0.97', '1.01', '0.89', '0.77', '0.74', '0.78', '0.83', '2.47', '0.93', '1.27', '1.23', '2.13', '0.75', '1.02', '0.72', '0.77', '0.93', '0.77', '0.53', '2.64', '0.68', '1.30', '1.03', '1.08', '0.86', '1.00', '1.81', '0.75', '0.54', '0.88', '0.66', '0.66', '0.68', '2.43', '0.76', '0.32', '2.60', '1.12', '3.15', '1.00', '1.02', '0.91', '0.43', '1.13', '0.69', '1.02', '1.03'…	0.808607
sp|P0A989|DPO3B_ECOL6	P0A989	DNA polymerase III subunit beta OS=Escherichia coli O6:H1 (strain CFT073 / ATCC 700928 / UPEC) GN=dnaN PE=3 SV=1	dnaN	0.884059	['0.82', '1.49', '0.43', '0.46', '0.50', '0.44', '1.26', '2.01', '0.54', '0.62', '0.56', '0.77', '1.97', '1.15', '0.48']	0.773062	['0.69', '1.24', '1.00', '0.58', '0.66', '1.05', '2.39', '1.60', '2.45', '1.13', '0.92', '0.70', '1.93', '1.16', '0.42', '1.48', '0.88', '1.39']	1.08161	['0.72', '0.82', '0.52', '0.87', '0.35', '1.35', '0.57', '1.04', '1.56', '0.50', '0.87', '0.45', '0.50', '1.06', '0.39', '0.82', '0.68', '0.68']	0.705399	['0.74', '0.61', '0.75', '0.31', '0.38', '0.37', '1.28', '0.55', '1.41', '3.77', '5.23', '3.67', '1.26', '1.10', '1.13']	1.03563
sp|P0AEH7|ELAB_ECO57	P0AEH7	Protein ElaB OS=Escherichia coli O157:H7 GN=elaB PE=3 SV=1	elaB	1.34905	['4.15', '2.34', '4.07']	3.40463	['0.96', '1.30', '1.28', '0.99', '1.51', '1.32', '1.05', '2.42', '1.21', '1.14', '0.84', '0.78']	1.17999	['1.11', '1.40', '0.77', '0.42', '0.84', '1.01', '0.79', '0.86', '1.56', '0.45', '1.04', '0.45', '1.28', '1.10', '0.99']	0.873779	['1.94', '2.84', '2.11', '0.49', '0.79', '0.58', '0.64', '0.62', '0.61', '0.61', '0.55', '0.59', '1.59', '1.34', '1.25', '0.81', '2.22', '0.87', '0.32', '0.93', '1.96']	0.943553
sp|B7UNI7|ENGB_ECO27	B7UNI7	Probable GTP-binding protein EngB OS=Escherichia coli O127:H6 (strain E2348/69 / EPEC) GN=engB PE=3 SV=1	engB	0.738132	['0.59', '0.48', '0.46', '0.62', '0.43', '0.50', '0.94', '1.49', '0.86', '0.21', '0.22', '1.31', '0.55', '0.43', '0.62', '0.68', '0.39', '1.58', '0.51', '0.34', '0.38', '0.46', '0.62', '0.48']	0.554958	['3.82', '0.89', '0.93', '0.54', '0.51', '0.44', '0.57', '0.91', '0.72', '1.34', '1.18', '1.15', '0.62', '0.67', '1.74', '0.58', '0.49', '0.96', '0.75', '0.93', '1.13', '1.21', '0.98', '1.04', '0.86', '0.70', '1.49', '0.79', '0.50', '0.87', '1.58', '1.15', '1.93']	0.915274	['0.61', '0.51', '0.25', '0.49', '0.56', '0.55', '1.14', '0.50', '0.64', '0.81', '0.71', '1.27', '0.71', '0.67', '0.70', '1.24', '1.30', '0.97', '0.50', '0.35', '0.38', '0.88', '0.50', '0.98']	0.660549	['0.93', '0.79', '0.58', '1.09', '0.60', '0.80', '1.55', '1.82', '1.89', '0.58', '0.76', '0.59', '1.82', '0.81', '0.98', '0.64', '0.76', '0.69', '0.58', '0.78', '0.78', '1.66', '1.83', '1.31', '0.78', '0.86', '0.29', '1.19', '1.11', '0.67', '0.71', '0.69', '0.97']	0.884746
sp|B7UHJ5|ENO_ECO27	B7UHJ5	Enolase OS=Escherichia coli O127:H6 (strain E2348/69 / EPEC) GN=eno PE=3 SV=1	eno	0.659601	['0.63', '0.70', '0.71', '0.57', '0.50', '0.23', '0.92', '1.26', '1.25', '0.45', '0.46', '0.47', '0.43', '0.43', '0.49', '0.56', '1.98', '0.81', '0.48', '0.64', '1.26', '0.60', '0.79', '1.43', '0.22', '1.30', '0.71', '0.73', '0.76', '1.29', '0.91', '0.96', '1.18', '0.44', '0.45', '0.44', '0.85', '0.63', '0.59', '0.37', '0.79', '0.95', '0.51', '0.50', '0.49', '0.48', '0.46', '0.55', '0.40', '0.45'…	0.626228	['0.52', '0.53', '0.57', '0.59', '0.52', '0.67', '0.53', '0.93', '0.76', '1.40', '1.35', '0.86', '0.44', '0.44', '0.46', '0.44', '0.36', '0.35', '0.65', '1.99', '0.98', '1.15', '0.77', '1.15', '0.40', '0.76', '0.63', '1.60', '1.68', '1.45', '1.07', '1.17', '1.15', '2.04', '0.59', '0.29', '0.37', '0.36', '0.38', '0.94', '1.07', '1.16', '0.30', '0.77', '1.50', '1.40', '0.42', '0.85', '0.68', '0.70'…	0.774255	['0.24', '0.22', '0.26', '0.47', '1.04', '0.85', '0.35', '0.36', '0.39', '0.43', '0.37', '0.37', '0.77', '0.32', '0.58', '0.29', '0.69', '0.39', '0.57', '0.29', '0.43', '0.37', '0.40', '0.44', '0.35', '0.33', '0.33', '0.43', '0.51', '0.50', '0.58', '0.62', '0.75', '1.25', '2.12', '5.94', '0.54', '0.89', '0.63', '0.49', '0.50', '0.45', '0.49', '0.44', '0.40', '0.44', '1.06', '1.51', '0.41', '0.50'…	0.470737	['1.24', '0.67', '0.57', '1.53', '1.29', '2.08', '1.51', '1.50', '2.95', '0.90', '0.91', '0.89', '0.88', '0.92', '0.89', '0.44', '1.10', '0.53', '0.40', '0.60', '0.47', '0.46', '0.34', '0.35', '1.06', '0.70', '0.28', '0.91', '0.82', '0.87', '0.66', '0.64', '0.69', '1.05', '1.08', '1.08', '0.82', '0.74', '0.78', '5.95', '2.46', '1.60', '1.12', '1.16', '1.17', '1.18', '1.39', '1.37', '1.37', '1.28'…	0.829338
sp|P0A953|FABB_ECOLI	P0A953	3-oxoacyl-[acyl-carrier-protein] synthase 1 OS=Escherichia coli (strain K12) GN=fabB PE=1 SV=1	fabB	0.884219	['1.03', '1.04', '0.95', '1.24', '1.19', '1.11', '0.83', '1.02', '0.89', '0.70', '0.71', '0.71', '0.59', '0.56', '0.20', '1.24', '1.17', '1.25', '0.84', '0.92', '1.11', '0.61', '0.61', '0.34', '0.67', '0.67', '0.75', '1.03', '0.90', '1.09', '1.38', '0.69', '0.83', '0.70', '0.66', '0.65', '1.15', '0.71', '0.63', '0.54', '0.55', '0.61', '0.90', '0.74', '0.75', '0.84', '0.80', '0.85', '0.30', '0.67'…	0.744762	['2.21', '1.85', '1.98', '1.62', '1.61', '1.69', '1.41', '0.97', '1.59', '0.76', '0.80', '0.74', '1.13', '0.18', '3.59', '0.87', '0.93', '0.87', '0.58', '0.54', '0.58', '1.80', '1.18', '0.94', '0.65', '2.47', '2.34', '0.49', '0.49', '1.81', '0.68', '0.76', '0.87', '0.94', '0.77', '0.66', '1.65', '0.57', '0.76', '1.01', '0.98', '1.01', '1.20', '0.85', '0.76', '0.67', '0.66', '0.65', '1.06', '0.94'…	1.21344	['0.28', '0.34', '0.39', '0.30', '0.28', '0.57', '0.97', '0.33', '0.37', '0.68', '1.65', '2.03', '0.72', '0.79', '1.06', '1.76', '4.26', '3.59', '0.64', '0.60', '0.81', '0.61', '0.62', '0.64', '0.86', '0.47', '0.45', '1.09', '0.88', '0.89', '0.48', '0.60', '0.66', '0.85', '0.60', '0.66', '1.28', '0.62', '1.32', '0.62', '0.48', '0.46', '0.49', '0.76', '0.44', '0.53', '0.55', '0.99', '0.42', '0.45'…	0.656202	['1.36', '1.28', '0.98', '1.23', '1.11', '0.83', '1.51', '0.98', '0.92', '1.15', '1.19', '1.21', '1.23', '2.74', '3.81', '0.45', '0.73', '0.98', '1.37', '1.55', '1.40', '1.26', '1.01', '1.20', '1.06', '2.90', '3.29', '1.02', '0.92', '1.26', '1.84', '1.71', '1.68', '0.89', '1.43', '1.60', '0.74', '0.69', '0.68', '2.07', '2.20', '1.82', '0.19', '0.86', '1.20', '0.37', '0.22', '0.56', '0.46', '0.55'…	1.03078
sp|P0AEK5|FABI_ECO57	P0AEK5	Enoyl-[acyl-carrier-protein] reductase [NADH] FabI OS=Escherichia coli O157:H7 GN=fabI PE=3 SV=2	fabI	1.10604	['0.89', '0.61', '0.72', '0.73', '0.91', '0.67', '0.63', '0.69', '0.56', '0.21', '0.66', '0.58', '0.92', '0.99', '0.97', '0.66', '0.77', '0.57', '1.50', '1.74', '1.66', '0.65', '0.77', '0.94', '1.18', '1.02', '1.22', '1.37', '1.23', '1.17', '1.38', '1.40', '1.40', '1.13', '0.99', '1.28', '1.44', '1.53', '1.52', '0.95', '1.24', '1.07', '1.25', '1.11', '1.16', '0.76', '1.36', '0.65', '2.90', '2.45'…	0.961493	['0.30', '0.32', '0.30', '0.71', '0.85', '0.70', '0.63', '0.69', '0.73', '0.84', '0.79', '1.08', '0.94', '1.11', '1.07', '1.40', '0.92', '1.06', '0.83', '1.65', '1.53', '1.90', '1.85', '1.84', '1.29', '1.93', '1.66', '0.89', '0.87', '1.13', '0.71', '1.26', '1.22', '2.12', '2.29', '2.38', '1.72', '1.81', '1.89', '1.09', '1.19', '1.25', '0.84', '0.42', '0.53', '0.85', '1.03', '1.15', '1.25', '1.26'…	1.00944	['1.12', '1.41', '1.14', '0.61', '0.56', '1.38', '0.73', '0.72', '0.49', '0.72', '0.60', '1.12', '0.72', '0.68', '0.92', '0.84', '2.21', '1.35', '0.99', '1.42', '0.99', '0.42', '0.48', '0.45', '0.80', '0.76', '0.54', '3.41', '2.77', '0.99', '2.14', '1.92', '5.00', '0.90', '1.03', '1.37', '0.28', '0.18', '0.23', '0.35', '0.35', '0.34', '0.84', '1.05', '0.53', '0.61', '0.90', '0.55', '0.56', '0.96'…	1.07406	['1.81', '1.58', '0.92', '1.35', '0.88', '0.89', '0.81', '0.57', '0.31', '1.37', '1.36', '1.23', '1.40', '1.23', '1.61', '1.07', '1.20', '1.13', '0.92', '0.94', '6.21', '0.44', '0.75', '1.63', '1.54', '2.23', '1.70', '1.49', '1.56', '1.43', '1.84', '3.55', '1.52', '1.02', '1.74', '1.61', '1.75', '1.02', '1.32', '8.56', '8.23', '4.16', '1.40', '1.46', '1.39', '1.33', '1.40', '1.62', '1.94', '2.55'…	1.43558
sp|P0AB72|ALF_ECO57	P0AB72	Fructose-bisphosphate aldolase class 2 OS=Escherichia coli O157:H7 GN=fbaA PE=3 SV=2	fbaA	0.862654	['0.80', '0.64', '0.74', '0.81', '1.14', '0.86', '0.70', '0.69', '0.77', '0.62', '0.63', '0.62', '0.68', '1.07', '0.28', '1.02', '1.01', '1.02', '0.40', '1.18', '1.70', '0.74', '0.90', '0.68', '0.73', '1.14', '2.27', '0.88', '0.62', '0.66', '0.70', '0.99', '0.54', '0.78', '1.14', '1.28', '0.89', '0.91', '1.06', '0.95', '1.02', '1.27', '0.92', '0.90', '0.93', '1.02', '1.02', '1.00', '1.38', '1.36'…	0.95741	['1.54', '1.91', '1.55', '1.62', '0.92', '1.36', '0.91', '0.92', '0.86', '0.66', '0.69', '0.69', '1.69', '0.65', '0.78', '0.84', '0.71', '1.41', '1.27', '1.35', '1.34', '0.39', '0.72', '0.98', '1.01', '1.02', '0.86', '1.34', '1.06', '1.12', '0.81', '0.76', '0.92', '1.22', '1.12', '1.07', '0.96', '0.82', '0.83', '0.61', '0.83', '0.77', '1.24', '1.29', '1.13', '1.22', '1.23', '1.37', '1.37', '1.34'…	1.0091	['1.33', '0.77', '1.45', '0.54', '1.27', '0.79', '0.67', '0.57', '0.70', '0.59', '0.63', '0.66', '0.83', '0.54', '0.79', '0.43', '0.51', '0.70', '0.38', '0.39', '0.36', '0.36', '0.38', '0.56', '1.59', '1.30', '1.69', '0.52', '0.37', '0.36', '0.47', '0.65', '0.47', '0.40', '0.46', '0.63', '0.93', '0.52', '0.62', '0.38', '0.54', '0.64', '0.44', '0.44', '0.65', '0.27', '0.26', '0.29', '0.30', '0.36'…	0.56954	['2.01', '1.20', '0.97', '0.93', '0.49', '2.11', '0.98', '1.17', '1.13', '1.18', '1.17', '1.17', '0.77', '1.18', '0.87', '1.89', '0.62', '1.02', '1.05', '0.98', '0.97', '0.59', '1.27', '0.89', '1.32', '1.38', '1.06', '0.77', '0.90', '0.77', '0.79', '0.60', '1.11', '0.18', '0.23', '0.54', '2.13', '1.40', '1.16', '1.43', '1.75', '1.16', '1.54', '0.87', '0.79', '0.96', '1.02', '0.99', '0.91', '0.91'…	1.00644
sp|Q8XCF0|F16PA_ECO57	Q8XCF0	Fructose-1,6-bisphosphatase class 1 OS=Escherichia coli O157:H7 GN=fbp PE=3 SV=1	fbp	0.750626	['0.61', '0.89', '0.66', '0.40', '0.55', '0.50', '0.71', '0.51', '0.43', '0.46', '0.43', '0.66', '0.32', '0.39', '0.73', '0.37', '0.41', '0.29', '0.56', '0.56', '0.42', '0.55', '0.71', '1.01', '0.59', '0.66', '0.65', '0.44', '0.57', '0.48', '0.32', '0.36', '0.28', '0.57', '0.42', '0.46', '0.52', '0.46', '0.48', '0.56', '0.38', '0.35', '0.44', '0.53', '0.41', '0.63', '0.43', '0.40']	0.491672	['1.26', '0.47', '0.67', '1.22', '1.09', '1.28', '1.08', '0.87', '0.94', '0.49', '0.33', '0.85', '1.29', '1.97', '2.78', '0.84', '0.93', '1.00', '0.71', '0.68', '1.01', '0.97', '1.00', '3.90', '0.24', '0.30', '0.22', '0.91', '0.52', '0.63', '0.66', '0.11', '0.66', '0.97', '0.77', '0.91', '0.66', '0.54', '0.46', '1.12', '1.14', '0.87', '0.97', '0.70', '0.57']	0.772216	['0.93', '0.60', '0.96', '0.64', '0.44', '0.37', '0.94', '0.47', '0.56', '0.91', '0.47', '0.63', '0.71', '0.63', '0.88', '0.51', '0.86', '0.81', '0.74', '0.64', '0.78', '0.57', '0.65', '0.89', '0.47', '0.84', '2.39', '0.67', '0.67', '0.74', '0.68', '0.89', '0.71', '0.59', '1.09', '0.97', '1.28', '0.83', '0.82']	0.729985	['1.02', '0.69', '1.35', '1.23', '0.89', '1.24', '1.09', '1.25', '1.47', '1.20', '1.23', '1.07', '1.14', '1.26', '1.37', '1.27', '1.21', '1.26', '1.03', '0.95', '1.53', '1.11', '0.93', '1.11', '0.86', '1.19', '0.90', '1.83', '1.13', '0.92', '1.08', '1.00', '0.94', '1.12', '1.02', '1.04', '3.92', '0.99', '0.91']	1.14543
sp|C5A059|FDHE_ECOBW	C5A059	Protein FdhE OS=Escherichia coli (strain K12 / MC4100 / BW2952) GN=fdhE PE=3 SV=1	fdhE	0.890447	['0.18', '0.27', '0.25', '0.92', '1.81', '1.54', '0.85', '1.13', '2.86']	0.763636	['0.41', '0.53', '0.61', '1.28', '1.07', '0.66', '0.73', '1.06', '0.74', '1.35', '0.42', '0.77', '1.26', '0.98', '0.99']	0.802382	['0.87', '1.19', '2.31', '1.06', '1.07', '0.94', '1.02', '1.01', '1.88', '1.36', '1.08', '0.42', '1.33', '1.02', '0.64', '0.86', '0.94', '1.05']	1.0468	['0.55', '0.71', '0.67', '1.01', '1.27', '0.97', '1.28', '0.53', '0.58', '1.45', '1.00', '1.40', '0.95', '1.22', '1.20', '0.95', '1.08', '0.36', '1.72', '2.06', '1.38']	0.980166
sp|P0ABQ5|DYR_ECOL6	P0ABQ5	Dihydrofolate reductase OS=Escherichia coli O6:H1 (strain CFT073 / ATCC 700928 / UPEC) GN=folA PE=3 SV=1	folA	0.913036	['0.53', '0.58', '1.09', '0.79', '0.74', '0.63', '0.87', '0.74', '0.85', '2.34', '1.12', '2.41']	0.930079	['1.21', '1.20', '1.06', '0.55', '1.50', '0.72', '0.67', '0.83', '0.67', '0.57', '0.33', '0.41', '0.87', '0.77', '1.06', '1.00', '1.21', '1.22', '1.87', '2.00', '2.71', '1.07', '1.42', '1.66', '0.77', '0.64', '0.80']	0.954708	['0.51', '0.34', '0.28', '1.47', '0.93', '1.23', '0.91', '0.53', '0.44', '0.57', '0.78', '0.57', '0.60', '1.05', '0.24', '1.26', '1.18', '1.21', '1.45', '0.31', '1.65', '0.83', '0.84', '1.32', '1.03', '2.34', '0.83', '0.46', '0.34', '0.46', '0.61', '0.58', '0.52', '0.90', '0.86', '1.60']	0.746978	['0.90', '0.79', '1.15', '1.19', '1.13', '0.87', '1.76', '3.60', '2.58', '0.80', '0.71', '0.86', '0.75', '0.73', '0.72', '1.11', '0.78', '0.88']	1.04774
sp|B7UKK6|FOLD_ECO27	B7UKK6	Bifunctional protein FolD OS=Escherichia coli O127:H6 (strain E2348/69 / EPEC) GN=folD PE=3 SV=1	folD	0.789081	['0.67', '0.55', '0.69', '0.76', '0.51', '0.59', '0.85', '0.63', '1.21', '0.36', '0.49', '0.53', '0.56', '0.88', '0.41']	0.617851	['0.73', '0.71', '0.56', '1.13', '1.38', '2.66', '0.78', '0.61', '1.61', '0.66', '0.92', '0.97', '0.70', '0.78', '1.18', '0.36', '1.29', '0.35']	0.85252	['0.29', '0.22', '0.38', '0.22', '0.27', '0.31', '1.33', '1.06', '0.94', '2.44', '0.39', '6.88', '0.47', '0.65', '0.89', '0.82', '0.92', '1.35', '0.74', '1.54', '1.73']	0.74585	['0.47', '1.13', '0.87', '0.27', '0.90', '0.44', '1.90', '0.83', '1.39', '0.95', '1.49', '0.54', '1.41', '1.68', '3.04', '1.85', '1.53', '1.55', '0.75', '1.08', '0.64', '1.83', '1.46', '1.07', '0.53', '0.60', '0.56']	0.98684
sp|B7UFG9|GCH1_ECO27	B7UFG9	GTP cyclohydrolase 1 OS=Escherichia coli O127:H6 (strain E2348/69 / EPEC) GN=folE PE=3 SV=1	folE	0.736391	['0.33', '0.33', '0.53']	0.38603	['2.28', '1.95', '2.92', '1.36', '1.13', '0.74']	1.56377			['0.74', '1.62', '0.94', '0.33', '0.34', '0.54', '0.21', '0.27', '0.35', '3.92', '1.12', '0.24', '0.78', '1.34', '1.30']	0.661505
sp|P0AC21|FOLX_ECO57	P0AC21	D-erythro-7,8-dihydroneopterin triphosphate epimerase OS=Escherichia coli O157:H7 GN=folX PE=3 SV=2	folX	1.01176	['1.51', '1.54', '0.50', '0.52', '3.84', '0.88']	1.1276	['0.84', '0.82', '2.22', '1.26', '1.65', '1.14', '1.00', '3.40', '6.26', '0.57', '0.81', '6.53']	1.57566	['0.08', '8.54', '0.08', '1.50', '0.44', '2.38']	0.663524	['0.99', '0.67', '1.06']	0.888868
sp|P28861|FENR_ECOLI	P28861	Ferredoxin--NADP reductase OS=Escherichia coli (strain K12) GN=fpr PE=1 SV=4	fpr	0.935216			['1.49', '1.81', '1.37', '1.08', '0.48', '1.39', '1.91', '1.47', '1.12', '1.06', '1.49', '1.24', '0.74', '0.79', '0.73']	1.13804	['1.77', '1.46', '0.08', '1.76', '1.39', '1.92', '0.21', '0.16', '0.18', '0.15', '0.15', '0.18', '0.60', '1.34', '1.46', '0.62', '0.42', '0.83', '0.60', '0.73', '0.81', '0.72', '0.61', '4.32']	0.596612	['1.04', '1.65', '1.21', '1.88', '0.74', '1.10', '1.97', '1.79', '1.41', '0.89', '1.39', '0.93', '1.06', '2.22', '0.38']	1.20472
sp|A7ZHR2|RRF_ECO24	A7ZHR2	Ribosome-recycling factor OS=Escherichia coli O139:H28 (strain E24377A / ETEC) GN=frr PE=3 SV=1	frr	1.00462	['1.07', '0.94', '0.91', '1.20', '1.05', '1.20', '0.82', '0.76', '0.82', '0.49', '0.56', '0.55', '0.42', '0.31', '0.53', '0.45', '0.33', '1.11', '1.23', '1.13', '1.28', '0.54', '0.52', '0.48', '0.63', '0.54', '0.63', '0.83', '0.56', '0.81', '0.66', '0.65', '1.20', '0.61', '0.71', '1.20', '1.66', '2.03', '1.11', '0.55', '0.57', '0.54', '0.41', '0.48', '0.72', '0.68', '0.52', '0.48', '0.64', '0.86'…	0.714084	['1.66', '3.28', '2.17', '2.95', '1.75', '1.28', '2.41', '2.35', '2.48', '1.16', '1.21', '1.26', '0.39', '0.76', '1.57', '1.32', '1.48', '0.57', '0.99', '1.03', '1.02', '0.96', '0.91', '0.99', '0.90', '0.84', '0.78', '1.22', '1.13', '1.19', '2.37', '2.53', '4.35', '2.89', '2.33', '4.43', '2.09', '2.29', '1.14', '0.78', '0.83', '0.86', '1.78', '0.75', '2.08', '0.57', '1.96', '1.02', '1.69', '1.53'…	1.30105	['1.26', '0.85', '0.92', '0.35', '0.22', '0.33', '0.47', '0.53', '0.52', '0.63', '0.63', '0.59', '0.65', '0.72', '0.70', '0.78', '1.04', '0.85', '1.11', '1.16', '1.19', '1.17', '1.08', '1.38', '0.93', '0.72', '0.51', '0.49', '0.51', '0.58', '0.64', '0.60', '0.62', '0.92', '0.99', '0.76', '1.13', '1.06', '1.73', '1.14', '1.16', '1.14', '1.00', '0.82', '3.56', '0.67', '0.61', '1.03', '0.87', '0.87'…	0.880268	['1.36', '1.41', '1.15', '0.77', '0.47', '0.42', '0.93', '0.89', '1.02', '0.79', '0.79', '0.72', '0.55', '0.82', '1.28', '1.40', '1.40', '1.42', '1.14', '1.13', '1.03', '1.24', '1.22', '1.05', '1.68', '1.71', '1.04', '1.32', '1.26', '1.23', '1.11', '0.82', '1.31', '1.12', '2.36', '1.49', '40.34', '18.48', '39.68', '0.98', '7.70', '1.23', '2.51', '1.25', '1.64', '0.82', '0.78', '0.68', '0.74', '1.…	1.24552
sp|P0ABH2|FTSA_ECO57	P0ABH2	Cell division protein FtsA OS=Escherichia coli O157:H7 GN=ftsA PE=3 SV=1	ftsA	0.926648	['3.06', '1.06', '2.82', '0.56', '0.32', '0.53']	0.978147	['1.98', '0.94', '0.85', '1.62', '2.96', '3.43', '0.65', '1.79', '1.03', '1.73', '1.67', '1.76', '1.32', '1.14', '1.28']	1.46376	['0.99', '1.19', '1.05', '0.12', '0.28', '0.21', '0.48', '0.46', '0.42', '0.48', '0.51', '2.37', '0.54', '0.79', '0.48', '0.33', '0.43', '0.36']	0.508599	['0.53', '0.67', '0.65', '1.33', '1.30', '1.27', '0.47', '1.08', '0.77', '0.97', '1.57', '1.30', '2.18', '1.11', '2.07', '0.89', '1.01', '1.09', '0.62', '0.68', '0.91', '1.01', '1.24', '1.43']	1.01253
sp|P0A9R9|FTSE_ECO57	P0A9R9	Cell division ATP-binding protein FtsE OS=Escherichia coli O157:H7 GN=ftsE PE=3 SV=1	ftsE	0.966232	['1.41', '0.47', '0.59']	0.730231	['1.45', '1.44', '1.23', '1.01', '1.27', '1.05', '0.82', '2.04', '1.35']	1.25676	['0.69', '1.22', '1.38', '0.48', '0.78', '0.67', '0.80', '0.83', '1.01', '0.40', '0.57', '0.57', '1.51', '0.70', '0.58']	0.757012	['0.79', '0.70', '1.27', '2.65', '1.50', '0.73', '2.38', '1.28', '1.09', '0.83', '0.90', '0.89', '1.81', '2.43', '1.51']	1.25461
sp|P0A9A7|FTSZ_ECOL6	P0A9A7	Cell division protein FtsZ OS=Escherichia coli O6:H1 (strain CFT073 / ATCC 700928 / UPEC) GN=ftsZ PE=3 SV=1	ftsZ	0.763982	['0.64', '0.60', '0.81', '0.68', '0.68', '1.95', '0.74', '0.84', '1.42', '0.27', '0.26', '0.33', '0.70', '0.95', '2.49', '0.97', '0.85', '4.07', '0.40', '0.56', '0.38', '0.36', '0.31', '0.36', '0.58', '1.07', '0.49', '0.42', '0.46', '0.53', '0.39', '0.55', '0.54', '0.60', '0.56', '0.65', '0.64', '0.67', '0.67', '0.73', '0.83', '0.69', '0.73', '2.05', '0.53', '1.55', '1.42', '1.21', '0.53', '1.02'…	0.659217	['0.84', '0.85', '1.07', '0.64', '0.83', '0.83', '0.92', '1.12', '0.89', '0.55', '0.64', '0.54', '0.62', '0.61', '0.63', '0.58', '0.58', '0.49', '0.86', '0.62', '0.55', '1.18', '0.98', '1.05', '0.65', '1.09', '0.62', '1.15', '0.99', '1.07', '0.83', '1.13', '1.01', '0.72', '0.69', '0.74', '0.79', '0.87', '0.77', '1.11', '1.33', '1.06', '0.71', '0.82', '0.86', '0.90', '2.05', '1.18', '1.40', '1.49'…	0.896936	['0.54', '0.47', '0.48', '0.52', '0.53', '0.80', '0.97', '1.04', '0.89', '0.70', '1.23', '0.56', '0.48', '0.52', '0.85', '0.62', '0.84', '0.93', '0.96', '0.60', '0.51', '0.48', '0.86', '1.34', '0.24', '0.33', '1.79', '0.36', '0.48', '1.61', '0.52', '0.54', '0.58', '0.54', '0.53', '0.63', '0.59', '0.78', '0.48', '1.07', '1.43', '1.98', '0.31', '0.31', '0.37', '0.49', '0.93', '0.47', '0.48', '1.62'…	0.640078	['0.93', '0.85', '0.65', '0.97', '1.26', '0.34', '0.95', '0.74', '0.66', '1.23', '1.19', '1.47', '0.25', '0.37', '0.92', '0.62', '0.46', '0.70', '1.39', '0.85', '1.10', '0.59', '0.74', '1.56', '0.53', '0.59', '1.36', '1.37', '1.36', '1.40', '1.05', '1.73', '1.05', '0.93', '0.97', '1.33', '0.77', '1.29', '0.70', '0.60', '1.12', '0.71', '1.37', '0.98', '1.17', '1.13', '0.86', '1.08', '1.76', '0.41'…	0.900138
sp|P0AC34|FUMA_ECOL6	P0AC34	Fumarate hydratase class I, aerobic OS=Escherichia coli O6:H1 (strain CFT073 / ATCC 700928 / UPEC) GN=fumA PE=3 SV=2	fumA	1.03777	['0.82', '0.66', '0.76', '2.09', '0.97', '0.86', '1.17', '0.56', '0.67', '0.96', '0.49', '0.41', '3.05', '1.89', '1.13', '0.96', '0.96', '0.88', '1.50', '2.07', '2.26', '0.98', '1.23', '0.75']	1.02986	['1.56', '1.26', '1.14', '0.85', '0.89', '0.61', '0.64', '0.68', '0.71', '1.00', '1.15', '1.01', '1.26', '1.26', '1.24', '3.66', '5.42', '3.17', '0.78', '0.80', '1.02', '1.75', '0.54', '0.56', '0.87', '0.36', '1.25', '4.79', '2.89', '4.33', '0.04', '1.18', '0.69', '1.41', '0.79', '0.68', '2.04', '0.52', '0.46', '7.73', '7.98', '0.47', '0.99', '1.16', '0.74', '2.44', '4.93', '4.61', '0.70', '1.74'…	1.20101	['0.90', '1.43', '0.77', '0.40', '0.39', '0.60', '1.59', '1.27', '1.00', '0.77', '1.15', '0.52', '1.22', '2.82', '1.28', '0.47', '0.63', '0.64', '10.46', '9.56', '1.41', '0.41', '0.70', '0.46', '0.92', '0.63', '0.47', '0.47', '0.32', '0.29', '0.28', '0.19', '0.28', '1.12', '1.15', '1.22', '0.77', '0.45', '0.39', '0.63', '3.10', '3.75', '1.07', '0.75', '1.00', '0.65', '0.54', '0.42', '1.01', '0.80…	0.833276	['0.78', '0.67', '0.72', '2.09', '0.85', '1.32', '0.78', '1.34', '0.84', '1.13', '1.02', '1.66', '1.56', '2.05', '1.91', '1.58', '1.43', '1.55', '0.32', '0.40', '0.64', '0.71', '1.16', '1.59', '0.80', '0.43', '1.06', '3.22', '10.02', '6.19', '3.81', '3.72', '4.80', '4.10', '1.13', '2.30', '2.09', '1.18', '1.30', '1.30', '1.13', '1.53', '0.12', '0.07', '1.02', '0.10', '0.57', '0.92', '0.58', '1.39…	1.12537
sp|B7UK50|EFG_ECO27	B7UK50	Elongation factor G OS=Escherichia coli O127:H6 (strain E2348/69 / EPEC) GN=fusA PE=3 SV=1	fusA	0.708133	['0.54', '0.55', '0.57', '0.05', '0.28', '0.15', '0.28', '0.34', '0.37', '0.52', '0.54', '0.52', '0.92', '0.67', '0.78', '0.58', '0.74', '0.65', '0.59', '0.60', '0.61', '0.67', '0.65', '0.55', '0.86', '0.67', '1.00', '0.79', '0.77', '0.99', '0.65', '0.68', '0.74', '0.80', '0.47', '0.44', '0.33', '0.41', '0.41', '1.11', '1.15', '1.14', '1.90', '1.14', '0.96', '0.60', '0.62', '0.61', '0.58', '0.62'…	0.562169	['0.57', '0.64', '0.64', '2.20', '0.59', '2.18', '0.88', '0.86', '1.05', '0.67', '0.82', '0.70', '0.86', '1.22', '1.35', '1.11', '0.95', '1.53', '0.88', '0.85', '0.92', '0.60', '0.68', '0.77', '0.87', '1.04', '1.05', '0.66', '0.54', '0.63', '1.02', '2.68', '1.64', '1.32', '1.41', '1.38', '1.13', '1.10', '1.14', '0.91', '0.74', '0.95', '2.75', '1.77', '1.30', '1.39', '1.00', '0.84', '1.59', '1.58'…	0.830991	['0.69', '0.50', '0.67', '0.49', '1.42', '1.45', '0.51', '0.49', '0.57', '0.52', '0.56', '0.52', '0.80', '0.76', '0.52', '0.50', '0.51', '0.62', '0.59', '0.58', '0.63', '0.66', '0.69', '0.35', '0.34', '0.13', '0.35', '0.39', '0.43', '0.40', '0.40', '0.38', '0.37', '0.55', '0.59', '0.99', '0.32', '0.32', '0.37', '0.32', '0.31', '0.29', '0.54', '0.80', '0.85', '0.48', '1.01', '1.14', '0.50', '1.22'…	0.553998	['2.36', '2.66', '1.23', '0.95', '0.90', '0.91', '0.84', '0.91', '0.89', '0.36', '0.54', '0.67', '0.14', '0.49', '1.10', '0.93', '1.21', '2.13', '0.75', '1.20', '1.70', '0.97', '1.02', '0.81', '0.85', '0.47', '0.68', '0.82', '0.83', '0.70', '0.76', '0.75', '0.77', '1.07', '1.01', '1.76', '0.88', '0.89', '0.71', '0.77', '0.80', '0.80', '0.47', '0.82', '0.82', '2.73', '2.65', '2.26', '0.76', '0.98'…	0.971601
sp|P58228|DCEA_ECO57	P58228	Glutamate decarboxylase alpha OS=Escherichia coli O157:H7 GN=gadA PE=3 SV=1	gadA	0.927689	['1.40', '1.43', '1.38', '0.74', '0.74', '0.52', '1.18', '1.64', '0.59', '1.63', '1.38', '1.88', '1.76', '1.50', '1.23', '0.79', '0.77', '0.78', '0.96', '0.94', '0.98', '2.42', '1.84', '0.97', '1.92', '3.25', '3.00', '1.12', '1.04', '1.07', '0.66', '2.24', '1.19', '0.71', '0.75', '0.74', '0.74', '0.77', '0.77', '0.67', '0.72', '0.87', '0.57', '0.46', '0.43', '0.83', '0.82', '0.76', '0.94', '0.94'…	1.00324	['0.69', '0.70', '0.68', '1.24', '1.22', '1.43', '0.43', '0.56', '0.34', '3.70', '2.31', '1.33', '8.79', '7.66', '10.11', '12.20', '10.53', '4.00', '1.00', '1.06', '1.01', '0.79', '0.83', '0.77', '0.65', '0.64', '0.72', '0.60', '1.98', '1.99', '1.69', '1.28', '2.14', '1.24', '3.21', '2.51', '0.84', '0.89', '1.48', '0.80', '0.82', '0.79', '0.76', '1.01', '1.71', '0.59', '0.57', '2.23', '1.33', '0.…	1.11382	['0.43', '0.34', '0.33', '0.91', '0.95', '1.43', '1.24', '1.71', '1.39', '4.86', '1.34', '0.97', '0.40', '0.57', '0.40', '0.43', '0.49', '0.50', '0.53', '0.55', '0.57', '1.06', '1.14', '1.15', '1.32', '1.29', '1.25', '0.91', '0.90', '0.79', '0.62', '0.93', '2.32', '0.49', '0.19', '0.63', '0.55', '0.59', '0.58', '1.02', '1.03', '1.11', '0.75', '0.95', '0.95', '1.20', '0.95', '1.53', '0.99', '1.04'…	0.871618	['0.92', '1.67', '0.47', '1.18', '1.18', '1.17', '1.36', '1.38', '1.38', '2.80', '2.91', '2.14', '0.79', '0.76', '0.76', '0.70', '0.67', '0.65', '0.74', '0.75', '0.73', '0.80', '0.83', '0.80', '0.98', '0.85', '1.07', '0.82', '0.98', '0.90', '0.41', '0.69', '0.57', '0.25', '0.60', '0.35', '1.29', '0.53', '0.48', '0.70', '0.69', '0.71', '0.79', '0.75', '0.74', '1.05', '0.74', '0.19', '0.86', '1.09'…	0.760438
sp|P69911|DCEB_ECO57	P69911	Glutamate decarboxylase beta OS=Escherichia coli O157:H7 GN=gadB PE=3 SV=1	gadB	0.934638	['1.40', '1.43', '1.38', '1.74', '1.73', '0.93', '1.18', '1.64', '0.59', '1.63', '1.38', '1.88', '1.76', '1.50', '1.23', '0.79', '0.77', '0.78', '0.96', '0.94', '0.98', '2.42', '1.84', '0.97', '1.92', '3.25', '3.00', '1.12', '1.04', '1.07', '0.66', '2.24', '1.19', '0.71', '0.75', '0.74', '0.74', '0.77', '0.77', '0.67', '0.72', '0.87', '0.57', '0.46', '0.43', '0.83', '0.82', '0.76', '0.94', '0.94'…	1.0034	['0.69', '0.70', '0.68', '0.95', '0.95', '0.74', '5.02', '3.36', '7.86', '0.43', '0.56', '0.34', '3.70', '2.31', '1.33', '8.79', '7.66', '10.11', '12.20', '10.53', '4.00', '1.00', '1.06', '1.01', '0.79', '0.83', '0.77', '0.65', '0.64', '0.72', '0.60', '1.98', '1.99', '1.69', '1.28', '2.14', '1.24', '3.21', '2.51', '0.84', '0.89', '1.48', '0.80', '0.82', '0.79', '0.76', '1.01', '1.71', '0.59', '0.…	1.09949	['0.91', '0.95', '1.43', '0.94', '0.94', '0.82', '4.86', '1.34', '0.97', '0.40', '0.57', '0.40', '0.43', '0.49', '0.50', '0.53', '0.55', '0.57', '1.06', '1.14', '1.15', '1.32', '1.29', '1.25', '0.91', '0.90', '0.79', '0.62', '0.93', '2.32', '0.49', '0.19', '0.63', '0.55', '0.59', '0.58', '1.02', '1.03', '1.11', '0.75', '0.95', '0.95', '1.20', '0.95', '1.53', '0.99', '1.04', '0.96', '1.00', '1.02'…	0.892669	['1.35', '1.11', '1.61', '1.18', '1.18', '1.17', '1.16', '1.14', '1.17', '1.38', '1.88', '1.88', '2.80', '2.91', '2.14', '0.79', '0.76', '0.76', '0.70', '0.67', '0.65', '0.74', '0.75', '0.73', '0.80', '0.83', '0.80', '0.98', '0.85', '1.07', '0.82', '0.98', '0.90', '0.41', '0.69', '0.57', '0.25', '0.60', '0.35', '1.29', '0.53', '0.48', '0.70', '0.69', '0.71', '0.79', '0.75', '0.74', '1.05', '0.74'…	0.774857
sp|P0AAB6|GALF_ECOLI	P0AAB6	UTP--glucose-1-phosphate uridylyltransferase OS=Escherichia coli (strain K12) GN=galF PE=1 SV=1	galF	0.791382	['0.35', '0.49', '0.43', '0.59', '0.53', '0.31', '0.24', '0.29', '0.65', '0.35', '0.39', '0.27', '0.57', '1.10', '0.98', '0.65', '0.60', '0.57', '1.02', '1.27', '0.71', '0.67', '0.59', '0.60', '0.50', '1.21', '0.56', '0.63', '0.57', '0.73']	0.562394	['0.82', '0.81', '1.02', '6.90', '5.86', '2.23', '0.91', '4.19', '1.69', '0.72', '0.19', '0.58', '0.97', '0.95', '0.89', '0.73', '0.70', '1.09', '1.31', '1.91', '0.89', '0.90', '0.89', '0.85', '0.67', '0.90', '0.97', '1.00', '1.00', '0.96', '0.94', '0.45', '0.89', '1.63', '1.53', '1.54', '1.01', '1.57', '0.96', '0.62', '0.76', '0.73', '1.35', '0.88', '0.86', '0.84', '0.69', '0.64']	1.02613	['0.36', '0.55', '0.45', '0.22', '0.27', '0.35', '0.41', '0.69', '0.77', '0.76', '1.01', '0.87', '0.21', '0.19', '0.56', '0.47', '0.38', '0.60', '1.29', '0.53', '1.14', '0.18', '0.12', '0.39', '1.14', '1.13', '1.88', '1.10', '0.85', '0.85', '0.61', '0.66', '0.95', '1.66', '0.96', '0.76', '0.42', '0.49', '0.43', '0.58', '0.74', '0.38', '0.52', '0.55', '0.59', '0.38', '0.77', '0.64']	0.568571	['1.41', '2.60', '2.30', '0.56', '0.50', '0.51', '0.55', '0.59', '0.63', '0.94', '0.77', '4.14', '0.85', '1.01', '1.42', '1.10', '1.36', '1.37', '0.43', '1.16', '2.36', '1.24', '1.41', '1.23', '1.33', '1.76', '0.70', '0.52', '1.01', '1.21', '1.41', '1.64', '2.35', '1.64', '1.48', '1.41', '1.76', '2.55', '1.32', '1.15', '1.20', '1.38', '1.59', '1.42', '1.41', '0.79', '0.75', '0.79', '1.21', '1.29'…	1.19541
sp|P0A9B3|G3P1_ECOL6	P0A9B3	Glyceraldehyde-3-phosphate dehydrogenase A OS=Escherichia coli O6:H1 (strain CFT073 / ATCC 700928 / UPEC) GN=gapA PE=3 SV=2	gapA	0.879616	['0.46', '0.45', '0.68', '1.13', '1.35', '1.11', '0.80', '0.82', '0.80', '1.31', '1.35', '1.48', '1.24', '1.37', '1.17', '1.80', '1.83', '1.84', '1.20', '1.36', '1.03', '0.67', '0.78', '0.80', '0.37', '0.41', '0.73', '0.45', '0.43', '0.48', '0.52', '0.48', '0.45', '0.60', '0.62', '0.62', '0.76', '0.78', '0.64', '0.80', '0.82', '0.83', '0.82', '0.86', '0.95', '0.82', '1.42', '1.09', '0.39', '0.39'…	0.845875	['0.64', '0.64', '0.62', '0.61', '0.88', '0.92', '0.43', '0.43', '0.43', '0.62', '0.63', '0.64', '0.53', '0.55', '0.54', '0.36', '0.34', '0.36', '36.24', '6.79', '35.04', '3.90', '14.64', '12.46', '35.63', '21.40', '4.50', '9.93', '17.33', '11.53', '1.04', '0.70', '0.53', '0.30', '0.29', '0.31', '1.53', '0.95', '1.25', '0.87', '0.76', '0.77', '0.51', '0.51', '0.64', '1.07', '0.92', '0.77', '1.00'…	1.0872	['0.64', '0.66', '0.73', '0.55', '0.67', '0.48', '0.80', '0.81', '0.80', '0.34', '0.39', '0.40', '0.31', '0.40', '0.29', '1.65', '1.53', '1.73', '0.35', '0.26', '0.45', '0.58', '0.53', '0.64', '0.49', '0.44', '0.52', '0.72', '0.74', '0.70', '0.75', '1.01', '0.60', '0.51', '0.53', '0.51', '0.71', '0.53', '0.55', '0.45', '1.31', '0.64', '0.52', '0.50', '0.50', '0.63', '0.64', '0.64', '0.65', '0.64'…	0.598406	['3.06', '3.10', '1.62', '0.25', '0.12', '0.17', '0.38', '2.15', '6.06', '1.05', '1.07', '1.06', '1.18', '1.15', '1.12', '1.07', '1.05', '1.17', '0.80', '2.58', '0.52', '1.23', '1.40', '1.40', '1.27', '1.34', '1.31', '0.59', '0.55', '0.55', '0.45', '0.64', '0.66', '0.84', '0.43', '0.69', '0.69', '0.78', '0.77', '0.61', '0.64', '0.74', '1.38', '1.40', '1.48', '1.23', '1.47', '1.39', '1.09', '1.21'…	1.08783
sp|A7ZNR5|GATY_ECO24	A7ZNR5	D-tagatose-1,6-bisphosphate aldolase subunit GatY OS=Escherichia coli O139:H28 (strain E24377A / ETEC) GN=gatY PE=3 SV=1	gatY	0.814201	['1.10', '0.51', '0.77', '0.38', '0.17', '0.38', '1.02', '0.57', '1.34', '0.37', '0.62', '0.83', '0.25', '0.12', '0.27', '0.33', '0.15', '0.41', '0.34', '0.85', '0.95', '0.65', '0.69', '0.79']	0.482164	['1.73', '0.46', '0.61', '0.68', '0.68', '0.84', '0.52', '0.62', '0.69', '0.64', '0.82', '0.92', '0.45', '0.67', '0.61', '0.86', '3.23', '0.92', '0.46', '0.89', '0.87', '0.95', '1.56', '1.57', '9.95', '6.43', '5.69', '1.87', '1.85', '2.74', '2.57', '2.45', '1.09', '0.24', '0.32', '0.30', '0.65', '0.49', '0.51', '0.69', '0.84', '0.76', '0.77', '0.73', '0.94', '0.67', '0.84', '0.75', '1.18', '1.96'…	0.955953	['0.32', '0.31', '0.37', '0.89', '0.42', '0.47', '13.12', '2.74', '6.03', '0.55', '0.82', '0.57', '1.19', '1.13', '2.68', '0.08', '0.06', '0.18', '0.10', '0.23', '0.09', '1.19', '0.69', '0.93', '2.40', '0.61', '1.39', '0.55', '0.75', '0.90', '0.87', '0.76', '1.89', '0.76', '0.66', '0.64', '1.43', '0.83', '0.72', '0.77', '3.11', '0.54', '1.31', '0.75', '0.58', '0.66', '0.62', '1.28', '1.21', '0.86…	0.711434	['1.28', '4.74', '1.44', '2.09', '1.85', '1.82', '0.98', '0.56', '0.57', '0.90', '1.61', '1.22', '0.89', '1.83', '1.79', '11.38', '6.74', '0.78', '1.28', '1.34', '1.51', '1.46', '1.34', '0.95', '2.11', '1.96', '1.40', '0.70', '0.44', '1.85', '0.13', '0.34', '0.23', '2.33', '1.80', '1.69', '1.48', '1.74', '2.26', '1.47', '0.93', '1.06', '2.52', '4.61', '3.40', '1.84', '1.99', '1.63', '1.25', '2.80…	1.34017
sp|A7ZR13|GCSH_ECO24	A7ZR13	Glycine cleavage system H protein OS=Escherichia coli O139:H28 (strain E24377A / ETEC) GN=gcvH PE=3 SV=1	gcvH	0.912949	['0.50', '0.44', '0.56', '1.03', '0.96', '0.42', '1.24', '1.26', '1.03', '0.96', '0.61', '0.68']	0.753269	['0.80', '0.77', '0.85', '0.66', '0.61', '0.65', '1.07', '0.89', '1.06', '0.29', '0.75', '0.53', '1.84', '0.88', '0.64']	0.760743	['0.48', '0.48', '0.56', '0.24', '0.51', '0.20', '1.66', '1.20', '1.60', '1.09', '0.98', '1.39', '1.95', '1.90', '1.71']	0.853732	['1.46', '1.44', '1.36']	1.41996
sp|P37747|GLF_ECOLI	P37747	UDP-galactopyranose mutase OS=Escherichia coli (strain K12) GN=glf PE=1 SV=1	glf	0.740645	['1.16', '0.78', '1.09', '0.32', '0.21', '0.26', '0.43', '0.47', '0.49', '0.95', '0.16', '0.20', '0.44', '0.31', '0.59', '1.47', '1.00', '1.67', '0.36', '0.41', '0.33']	0.501557	['0.75', '0.40', '1.35', '1.42', '0.98', '1.47', '1.88', '0.86', '0.66', '0.65', '0.85', '0.58', '0.55', '0.57', '0.50', '0.63', '0.79', '0.89', '0.30', '1.79', '1.36', '0.67', '0.69', '0.91', '0.55', '0.50', '0.72', '0.84', '1.48', '1.56', '0.44', '1.85', '1.87']	0.843032	['4.84', '1.26', '0.30', '0.41', '0.84', '0.97', '0.46', '0.65', '0.44', '0.54', '0.53', '0.48', '1.08', '1.00', '1.09', '0.49', '0.89', '0.84', '0.34', '1.44', '0.95', '0.69', '0.26', '1.24', '0.81', '1.10', '1.80', '0.38', '0.55', '0.19', '1.59', '0.88', '2.28']	0.758076	['1.83', '1.62', '1.74', '0.74', '1.20', '1.39', '0.53', '0.62', '0.50', '0.51', '0.53', '0.53', '0.71', '0.82', '0.35', '0.93', '1.07', '0.74', '1.07', '0.46', '1.62', '1.00', '1.04', '0.88', '1.68', '1.26', '0.53', '1.21', '1.42', '1.58', '1.91', '1.23', '1.07']	0.938777
sp|B7UJ69|GLMM_ECO27	B7UJ69	Phosphoglucosamine mutase OS=Escherichia coli O127:H6 (strain E2348/69 / EPEC) GN=glmM PE=3 SV=1	glmM	0.756512	['0.41', '0.43', '0.44', '0.36', '0.36', '1.94', '0.79', '0.77', '0.83', '0.39', '0.40', '0.36', '0.38', '0.18', '0.17', '0.42', '0.55', '0.35', '0.87', '0.76', '1.12', '0.83', '0.59', '1.21', '0.54', '0.46', '0.64', '0.50', '0.35', '0.49', '0.20', '0.26', '0.24', '0.48', '0.51', '0.55', '0.43', '0.45', '0.40', '0.89', '0.44', '0.94', '0.55', '0.48', '1.02', '0.50', '0.74', '0.75', '0.73', '0.80'…	0.504738	['0.63', '1.15', '0.81', '0.61', '0.82', '0.98', '0.37', '1.08', '0.76', '7.10', '10.89', '12.36', '3.83', '12.32', '6.10', '0.73', '0.60', '0.62', '1.28', '2.17', '0.27', '1.20', '0.24', '0.22', '0.66', '0.91', '0.64', '0.62', '0.65', '0.83', '2.17', '1.95', '1.52', '0.67', '0.73', '0.73', '0.81', '0.44', '0.46', '0.95', '0.87', '1.08', '0.61', '0.51', '0.53', '0.80', '0.72', '0.52', '1.82', '0.…	0.958238	['0.18', '0.10', '0.59', '0.62', '0.57', '0.51', '1.74', '0.69', '0.81', '0.40', '0.28', '0.10', '0.27', '0.16', '0.12', '0.54', '1.75', '1.30', '0.63', '0.47', '0.67', '0.55', '0.87', '0.67', '0.83', '0.45', '0.78', '0.59', '1.07', '0.80', '0.32', '0.39', '0.39', '0.80', '0.58', '0.44', '0.18', '0.24', '0.23', '0.25', '0.24', '0.24', '1.38', '0.99', '1.30', '0.55', '0.96', '0.72', '2.31', '0.53'…	0.570069	['1.05', '1.15', '1.33', '0.58', '0.64', '0.42', '1.12', '0.54', '1.16', '1.65', '1.16', '0.76', '0.86', '1.02', '0.91', '1.07', '1.00', '0.89', '1.56', '1.83', '1.44', '1.44', '0.89', '0.77', '0.96', '0.26', '0.88', '1.29', '1.27', '1.20', '0.51', '1.32', '1.36', '1.21', '2.03', '0.82', '6.20', '4.81', '2.46', '2.36', '2.32', '1.66', '1.33', '1.78', '1.40', '1.10', '1.19', '1.16', '0.89', '0.35'…	1.18795
sp|Q8XEG2|GLMS_ECO57	Q8XEG2	Glucosamine--fructose-6-phosphate aminotransferase [isomerizing] OS=Escherichia coli O157:H7 GN=glmS PE=3 SV=3	glmS	0.839533	['1.11', '1.12', '1.13', '0.72', '0.90', '0.92', '0.69', '0.94', '0.77', '0.62', '0.60', '1.51', '1.74', '1.38', '1.39', '1.16', '0.22', '0.29', '1.24', '0.77', '2.43', '0.65', '0.66', '0.93', '0.98', '0.68', '0.54', '0.89', '0.64', '0.97', '0.75', '0.94', '0.38', '0.16', '0.23', '0.54', '0.56', '0.59', '0.54', '0.70', '0.83', '0.77', '1.20', '0.93', '1.99', '0.63', '0.45', '0.54', '0.67', '0.72'…	0.785913	['2.54', '0.68', '0.62', '1.28', '1.08', '1.11', '0.50', '0.70', '0.58', '0.44', '1.02', '0.43', '0.71', '0.51', '0.25', '0.39', '0.45', '0.48', '0.50', '0.46', '0.59', '4.37', '8.72', '5.21', '4.97', '3.22', '3.47', '0.63', '0.82', '0.68', '0.81', '0.68', '0.71', '1.07', '0.57', '1.28', '1.02', '1.24', '0.62', '0.42', '0.30', '0.79', '0.96', '0.74', '0.63', '1.11', '0.76', '1.02', '0.73', '0.70'…	0.813192	['0.72', '1.19', '1.21', '0.35', '0.32', '0.34', '0.56', '0.61', '0.69', '0.60', '0.63', '0.86', '0.57', '0.44', '0.43', '0.66', '1.58', '2.04', '0.61', '0.49', '0.58', '1.14', '0.57', '0.93', '0.57', '0.68', '1.19', '0.29', '0.71', '0.77', '1.16', '0.68', '1.38', '0.52', '0.50', '0.44', '0.64', '0.50', '0.80', '1.11', '6.38', '10.47', '1.25', '1.01', '0.91', '1.18', '0.55', '0.70', '0.02', '0.05…	0.695963	['0.93', '1.72', '1.83', '0.95', '1.02', '0.88', '0.95', '0.84', '0.76', '0.91', '0.78', '1.14', '1.02', '1.12', '0.96', '0.79', '0.71', '2.90', '2.19', '0.48', '0.45', '0.86', '1.00', '1.02', '0.90', '0.89', '1.18', '1.44', '1.13', '1.10', '1.21', '1.11', '0.64', '0.88', '0.89', '1.06', '0.58', '0.28', '0.57', '1.16', '0.71', '0.72', '0.34', '0.74', '0.66', '1.28', '2.23', '1.93', '0.87', '1.04'…	1.11686
sp|B7UMJ5|GLMU_ECO27	B7UMJ5	Bifunctional protein GlmU OS=Escherichia coli O127:H6 (strain E2348/69 / EPEC) GN=glmU PE=3 SV=1	glmU	0.917786	['1.05', '0.75', '0.27', '1.36', '1.52', '1.82', '1.92', '1.08', '0.83', '0.72', '0.70', '0.73', '0.66', '0.55', '0.45']	0.847644	['1.12', '2.13', '0.79', '0.63', '0.71', '1.30', '0.16', '0.16', '0.16', '0.51', '1.04', '0.48', '1.48', '0.95', '1.05', '1.13', '0.93', '1.11', '0.73', '0.87', '1.12', '1.00', '1.16', '0.57', '0.92', '0.77', '1.24']	0.769965	['0.39', '0.47', '0.63', '2.19', '2.15', '1.59', '0.92', '0.93', '0.93', '0.37', '0.73', '0.78', '0.82', '0.92', '0.62']	0.834775	['0.79', '1.03', '0.99', '1.73', '1.97', '2.28', '1.56', '0.97', '1.55', '2.25', '2.12', '2.25', '1.41', '1.49', '1.36', '0.90', '1.28', '1.15', '0.83', '0.54', '1.37', '1.25', '1.02', '1.59', '1.00', '1.08', '1.25', '1.00', '1.40', '2.19', '1.45', '1.22', '1.10']	1.3023
sp|P0A9D0|GLPX_ECOL6	P0A9D0	Fructose-1,6-bisphosphatase class 2 OS=Escherichia coli O6:H1 (strain CFT073 / ATCC 700928 / UPEC) GN=glpX PE=3 SV=1	glpX	0.844636	['0.48', '0.46', '0.72', '0.65', '0.69', '0.50', '0.47', '0.61', '0.60', '0.81', '0.43', '0.62', '0.85', '0.79', '1.11', '0.56', '0.56', '0.76', '0.50', '1.61', '0.35', '0.71', '0.36', '0.66']	0.621122	['0.85', '0.79', '0.63', '0.83', '0.67', '0.52', '1.21', '1.06', '1.40', '0.88', '1.14', '1.05', '0.97', '0.98', '0.84', '1.10', '1.12', '0.99', '0.78', '0.75', '0.25', '0.92', '2.24', '0.88']	0.889131	['0.75', '0.63', '0.74', '1.17', '0.79', '1.03', '0.55', '0.67', '0.40', '1.06', '0.94', '1.18', '0.70', '0.52', '0.64']	0.751045	['0.65', '0.63', '0.64', '1.39', '1.30', '0.93', '0.69', '1.16', '0.85', '2.16', '2.70', '0.17', '1.95', '2.30', '3.56', '1.06', '1.05', '1.08', '1.08', '1.00', '1.52', '1.91', '3.44', '2.26']	1.22707
sp|Q8XD23|GLSA1_ECO57	Q8XD23	Glutaminase 1 OS=Escherichia coli O157:H7 GN=glsA1 PE=3 SV=1	glsA1	0.969248	['1.34', '1.09', '1.04', '0.88', '1.29', '1.25', '1.37', '1.11', '1.18']	1.16044	['0.85', '0.87', '0.73', '1.27', '1.64', '1.32', '1.01', '0.84', '0.85', '2.77', '1.48', '1.67', '1.12', '3.59', '1.02']	1.25488	['0.78', '0.75', '0.95', '0.20', '0.21', '0.19', '0.25', '0.28', '0.23', '0.59', '0.48', '0.76', '0.63', '0.74', '0.89', '0.75', '0.44', '0.93', '0.64', '0.44', '0.90']	0.500975	['0.85', '1.88', '2.69', '1.14', '1.26', '1.01', '0.96', '0.98', '0.69', '0.57', '4.61', '0.94']	1.20976
sp|B7UGZ1|GLYA_ECO27	B7UGZ1	Serine hydroxymethyltransferase OS=Escherichia coli O127:H6 (strain E2348/69 / EPEC) GN=glyA PE=3 SV=1	glyA	0.873191	['0.63', '0.63', '0.59', '0.75', '0.69', '0.76', '1.27', '1.15', '0.97', '0.49', '0.46', '0.52', '0.76', '0.75', '0.79', '0.88', '0.87', '0.95', '0.86', '0.93', '0.90', '0.52', '0.42', '0.37', '0.58', '0.51', '0.51', '0.62', '0.62', '0.61', '0.87', '0.59', '0.49', '0.58', '0.56', '1.65', '0.72', '0.43', '0.16', '0.52', '0.45', '0.43', '1.28', '1.19', '1.21', '0.96', '1.38', '0.76', '0.91', '0.90'…	0.819208	['2.37', '2.22', '2.28', '1.75', '1.76', '1.75', '1.22', '2.60', '1.65', '2.28', '1.82', '1.49', '0.57', '0.60', '0.53', '0.58', '1.14', '0.53', '0.58', '0.59', '0.60', '0.33', '0.33', '0.34', '2.49', '2.17', '1.84', '0.42', '0.43', '0.44', '0.57', '0.56', '0.59', '0.83', '0.57', '0.43', '5.53', '3.74', '3.06', '2.19', '3.84', '3.53', '1.75', '1.34', '1.45', '2.29', '2.08', '2.16', '1.71', '1.40'…	1.09837	['0.20', '0.21', '0.18', '0.31', '0.33', '0.31', '0.34', '0.40', '0.51', '0.60', '0.72', '0.93', '0.29', '1.75', '0.68', '0.47', '0.47', '0.46', '0.58', '0.60', '2.40', '1.37', '1.59', '1.11', '0.49', '0.34', '0.69', '0.50', '0.47', '0.94', '0.90', '0.37', '0.71', '0.99', '0.35', '0.40', '1.47', '1.12', '2.21', '1.01', '0.96', '0.95', '0.49', '0.38', '0.58', '0.58', '0.62', '0.78', '0.85', '1.10'…	0.559237	['1.01', '0.97', '1.03', '1.08', '1.02', '1.02', '0.95', '1.12', '0.95', '0.95', '1.31', '1.18', '1.33', '1.59', '1.02', '1.22', '1.20', '1.18', '2.07', '2.06', '2.24', '2.13', '2.12', '1.12', '1.46', '1.30', '1.28', '0.74', '0.33', '0.82', '0.93', '0.62', '3.92', '1.48', '0.51', '2.28', '0.59', '0.86', '0.90', '1.29', '0.49', '0.45', '1.34', '0.83', '0.77', '1.26', '1.27', '1.32', '1.02', '0.99'…	1.1553
sp|B7ULB9|SYGB_ECO27	B7ULB9	Glycine--tRNA ligase beta subunit OS=Escherichia coli O127:H6 (strain E2348/69 / EPEC) GN=glyS PE=3 SV=1	glyS	0.873679	['0.80', '0.81', '0.89', '0.49', '0.83', '0.44', '0.78', '0.62', '0.65', '0.67', '0.71', '0.87', '0.80', '0.34', '0.38', '20.38', '1.46', '1.43', '0.59', '0.47', '0.27', '0.51', '0.46', '0.99', '0.68', '0.59', '0.66', '0.49', '0.91', '0.74', '0.62', '0.57', '0.45', '0.45', '0.66', '0.43', '1.05', '1.13', '1.05', '0.80', '0.99', '0.75', '0.77', '0.65', '1.33', '1.37', '0.74', '0.78', '0.77', '0.97…	0.77956	['0.75', '0.64', '0.60', '1.79', '0.50', '1.85', '0.43', '0.46', '1.14', '0.40', '0.42', '0.41', '0.99', '1.21', '1.38', '0.44', '0.49', '0.11', '0.69', '0.86', '1.76', '3.09', '0.69', '0.53', '0.63', '0.68', '1.97', '0.41', '0.42', '0.91', '1.57', '1.68', '0.92', '0.98', '1.45', '1.44', '0.75', '0.57', '0.44', '0.73', '0.81', '0.75', '0.42', '0.58', '0.68', '1.00', '0.47', '0.45', '3.51', '2.88'…	0.900757	['0.28', '0.34', '0.45', '0.66', '0.94', '2.47', '1.00', '1.18', '0.80', '0.72', '0.33', '0.59', '0.65', '0.74', '0.68', '0.32', '0.26', '0.40', '0.44', '0.70', '0.28', '1.17', '1.19', '0.48', '0.65', '0.64', '0.77', '0.90', '1.05', '0.91', '0.56', '0.84', '1.26', '0.53', '0.46', '0.50', '0.77', '0.88', '0.76', '0.69', '0.75', '0.80', '0.89', '0.43', '0.64', '0.82', '0.61', '0.59', '0.73', '1.14'…	0.802276	['0.57', '0.59', '2.14', '0.69', '2.04', '0.93', '0.84', '0.99', '0.94', '0.84', '2.86', '0.69', '4.29', '1.75', '1.35', '0.90', '1.15', '3.23', '1.10', '1.12', '1.13', '0.27', '5.70', '5.40', '1.46', '1.87', '0.95', '1.14', '0.68', '0.69', '0.69', '0.70', '0.59', '0.75', '0.76', '1.25', '0.80', '0.75', '1.42', '1.11', '1.12', '1.08', '1.12', '1.08', '1.17', '1.08', '0.68', '1.55', '0.97', '1.07'…	1.03425
sp|P37754|6PGD9_ECOLX	P37754	6-phosphogluconate dehydrogenase, decarboxylating OS=Escherichia coli GN=gnd PE=3 SV=1	gnd	0.897591	['0.67', '0.75', '0.62', '0.52', '0.51', '1.31', '0.75', '0.77', '0.72', '0.74', '1.25', '0.87', '0.61', '0.81', '0.95', '0.93', '1.10', '1.42', '0.93', '1.00', '0.94', '0.97', '1.00', '1.29', '0.81', '1.00', '0.79', '1.10', '1.27', '1.18', '0.73', '0.57', '0.93', '2.02', '0.99', '1.06', '0.58', '0.49', '0.55', '0.72', '1.05', '1.25', '0.72', '0.69', '0.74', '0.71', '0.95', '0.80', '0.61', '0.51'…	0.795125	['1.03', '1.24', '1.73', '0.67', '0.89', '1.24', '1.35', '1.27', '0.93', '0.66', '0.79', '1.06', '0.36', '0.40', '0.34', '1.02', '0.89', '6.52', '0.16', '0.16', '0.19', '0.19', '0.10', '0.17', '3.21', '1.31', '1.56', '2.33', '0.35', '2.60', '0.86', '1.17', '1.03', '0.66', '0.65', '0.77', '0.86', '0.81', '0.92', '0.79', '0.83', '0.79', '15.82', '2.33', '2.46', '1.57', '1.16', '1.76', '0.32', '0.33…	0.869379	['0.64', '1.52', '0.85', '0.56', '0.49', '0.77', '0.48', '0.54', '0.48', '0.90', '0.49', '0.46', '0.77', '0.68', '0.54', '0.84', '1.29', '0.58', '0.87', '0.89', '0.66', '2.10', '1.11', '0.71', '0.82', '0.71', '0.71', '0.46', '0.50', '0.55', '0.53', '0.57', '0.56', '0.97', '0.91', '0.71', '0.69', '0.76', '0.67']	0.706593	['1.28', '0.89', '0.95', '0.61', '0.80', '24.70', '0.88', '0.97', '2.85', '0.60', '0.36', '1.12', '3.92', '3.02', '2.85', '1.93', '1.60', '1.02', '1.38', '0.62', '1.11', '1.10', '1.09', '1.09', '1.30', '1.34', '2.40', '1.09', '0.93', '1.25', '1.75', '0.39', '0.44', '1.00', '1.68', '0.85', '1.34', '1.01', '1.96', '1.29', '1.43', '1.18', '0.82', '1.11', '1.21', '0.88', '2.00', '1.31', '0.84', '4.68…	1.32892
sp|P0AC92|GNSA_ECOLI	P0AC92	Protein gnsA OS=Escherichia coli (strain K12) GN=gnsA PE=3 SV=1	gnsA	0.919087	['0.37', '0.66', '0.52', '1.69', '1.61', '1.14', '0.99', '0.79', '0.19', '0.55', '0.38', '1.09']	0.697139	['1.56', '1.52', '0.99', '1.07', '1.13', '1.07', '2.01', '1.19', '1.58', '2.02', '1.14', '0.53', '1.50', '1.52', '1.54', '1.12', '0.78', '0.76', '0.97', '1.81', '0.52']	1.17366	['0.89', '1.05', '1.15', '0.68', '0.61', '0.69', '1.53', '1.53', '3.45', '0.83', '1.51', '1.94', '1.01', '0.97', '1.00', '2.64', '0.58', '0.55', '1.37', '0.83', '0.67']	1.06562	['0.86', '0.63', '0.79', '0.51', '0.59', '1.34', '3.17', '1.80', '2.36', '0.32', '0.35', '0.48', '1.46', '1.43', '0.19']	0.8184
sp|P77695|GNSB_ECOLI	P77695	Protein gnsB OS=Escherichia coli (strain K12) GN=gnsB PE=3 SV=2	gnsB	0.915475	['0.76', '1.03', '0.73', '0.07', '0.12', '0.25', '1.69', '1.61', '1.14', '0.99', '0.79', '0.19', '0.55', '0.38', '1.09']	0.548282	['0.65', '0.85', '0.87', '1.96', '1.60', '1.82', '0.53', '3.54', '3.67', '1.31', '1.24', '1.38', '0.85', '0.38', '3.29', '0.45', '0.87', '1.55', '2.19', '2.61', '1.17', '2.80', '2.56', '1.13', '1.03', '1.08', '1.00', '2.01', '1.19', '1.58', '2.02', '1.14', '0.53', '1.50', '1.52', '1.54', '1.12', '0.78', '0.76', '0.97', '1.81', '0.52']	1.25833	['0.97', '0.78', '0.63', '1.22', '0.86', '1.34', '1.88', '1.09', '1.21', '4.84', '1.91', '1.79', '1.27', '1.23', '0.80', '0.44', '0.60', '1.21', '1.24', '1.03', '1.15', '0.40', '0.65', '1.27', '1.53', '1.53', '3.45', '0.83', '1.51', '1.94', '1.01', '0.97', '1.00', '2.64', '0.58', '0.55', '1.37', '0.83', '0.67']	1.11386	['1.06', '1.27', '1.66', '0.51', '0.59', '1.34', '3.17', '1.80', '2.36', '0.32', '0.35', '0.48', '1.46', '1.43', '0.19']	0.914019
sp|B7ULM8|GPMA_ECO27	B7ULM8	2,3-bisphosphoglycerate-dependent phosphoglycerate mutase OS=Escherichia coli O127:H6 (strain E2348/69 / EPEC) GN=gpmA PE=3 SV=1	gpmA	0.970349	['1.34', '1.42', '1.46', '0.73', '1.27', '0.76', '2.12', '2.18', '1.76', '0.86', '2.02', '1.02', '1.37', '1.62', '0.55', '0.95', '3.60', '3.75', '1.70', '3.08', '1.06', '1.97', '0.82', '0.66', '5.06', '5.24', '5.44', '0.58', '0.84', '1.24', '1.79', '1.01', '0.25', '0.89', '1.69', '1.34', '1.34', '1.53', '1.98', '2.74', '2.80', '1.48', '1.48', '1.63', '1.46', '1.52', '1.47', '1.46', '1.62', '1.60'…	1.44887	['1.79', '1.70', '2.10', '1.89', '1.94', '1.14', '0.92', '0.77', '0.80', '0.97', '1.03', '0.73', '0.74', '1.32', '0.98', '1.28', '0.90', '1.26', '0.74', '0.53', '0.67', '0.89', '0.88', '1.07', '0.61', '1.00', '0.92', '1.17', '0.39', '1.09', '1.69', '1.75', '1.18', '2.39', '2.14', '2.01', '1.41', '1.41', '1.49', '1.28', '1.33', '1.21', '1.16', '0.96', '0.94', '0.93', '0.95', '0.87', '1.05', '1.43'…	1.05451	['0.67', '0.53', '0.49', '0.63', '0.70', '0.82', '0.30', '0.20', '0.21', '0.29', '0.25', '0.22', '0.21', '0.39', '0.29', '1.57', '13.51', '14.58', '1.07', '0.57', '0.78', '0.71', '0.35', '0.58', '0.47', '1.50', '1.21', '1.56', '1.60', '0.80', '0.38', '2.16', '0.30', '0.33', '0.36', '0.58', '0.59', '0.59', '0.57', '0.72', '0.82', '0.93', '1.11', '0.94', '1.04', '1.01', '1.08', '1.15', '1.31', '0.4…	0.732553	['0.69', '0.70', '0.67', '1.05', '1.23', '0.96', '0.94', '1.10', '0.86', '0.34', '0.33', '0.35', '0.28', '0.29', '0.31', '0.27', '0.26', '0.26', '1.07', '1.48', '0.75', '0.69', '0.50', '0.47', '0.83', '1.32', '1.22', '1.03', '1.46', '1.00', '14.52', '0.96', '0.92', '0.29', '1.08', '0.78', '0.08', '1.74', '1.63', '0.77', '1.33', '0.77', '0.73', '0.78', '0.61', '0.99', '1.00', '1.00', '0.80', '0.83…	0.792122
sp|B7UH18|GRCA_ECO27	B7UH18	Autonomous glycyl radical cofactor OS=Escherichia coli O127:H6 (strain E2348/69 / EPEC) GN=grcA PE=3 SV=1	grcA	3.2837	['2.87', '2.19', '2.38', '2.32', '2.58', '1.49', '0.94', '1.03', '0.65', '2.20', '2.03', '2.11', '2.22', '2.14', '2.03', '3.24', '3.02', '3.07', '2.29', '1.56', '2.12', '2.41', '2.43', '1.46', '5.10', '5.54', '4.13', '2.66', '2.63', '2.68', '2.51', '2.45', '2.52', '2.45', '2.34', '2.44', '2.72', '2.46', '2.68', '2.12', '1.91', '2.41', '2.47', '2.31', '2.32', '2.35', '2.74', '2.15', '1.84', '1.35'…	2.34194	['3.39', '3.41', '3.34', '4.49', '4.56', '4.05', '4.17', '4.12', '3.64', '2.70', '3.57', '2.09', '7.42', '7.51', '7.59', '5.51', '5.67', '5.76', '9.90', '9.97', '10.00', '4.25', '5.87', '4.55', '3.02', '3.46', '2.48', '1.44', '2.09', '1.47', '3.55', '3.62', '3.53', '3.87', '3.84', '3.87', '2.84', '2.82', '2.93', '0.73', '0.79', '0.60', '3.36', '3.18', '3.29', '2.92', '3.40', '2.90', '5.75', '1.18…	3.11241	['2.55', '2.46', '2.60', '2.56', '2.56', '2.55', '3.81', '3.57', '3.22', '1.59', '1.53', '1.55', '2.25', '1.71', '1.94', '1.85', '1.80', '1.82', '1.78', '1.67', '1.73', '2.94', '2.86', '3.03', '2.79', '2.69', '2.78', '2.50', '2.48', '2.51', '2.64', '2.54', '2.59', '2.62', '2.53', '2.56', '3.47', '2.19', '2.02', '2.37', '1.76', '1.58', '2.81', '2.91', '1.12', '2.96', '1.41', '2.30', '1.63', '2.31'…	2.30195	['6.27', '4.15', '4.62', '7.47', '7.13', '6.63', '5.94', '5.89', '5.21', '4.57', '3.18', '4.50', '6.84', '8.65', '7.18', '6.90', '4.30', '4.87', '5.37', '7.24', '9.65', '10.87', '9.81', '10.07', '7.89', '7.67', '7.87', '7.98', '6.15', '13.83', '5.60', '5.11', '5.20', '4.18', '3.87', '16.04', '12.53', '12.99', '13.09', '10.20', '8.55', '7.07']	6.92922
sp|A1AJ51|CH601_ECOK1	A1AJ51	60 kDa chaperonin 1 OS=Escherichia coli O1:K1 / APEC GN=groL1 PE=3 SV=1	groL1	0.771466	['0.67', '0.65', '0.71', '0.62', '0.61', '0.81', '0.48', '0.49', '0.62', '0.56', '0.66', '0.62', '0.77', '0.86', '0.88', '0.82', '0.71', '0.73', '0.58', '0.50', '0.54', '0.34', '0.27', '0.71', '0.71', '0.78', '0.73', '0.64', '0.96', '0.75', '0.48', '0.49', '0.48', '0.58', '0.35', '0.78', '1.01', '1.01', '1.12', '0.42', '0.68', '0.26', '0.55', '0.78', '0.77', '0.55', '0.88', '0.90', '0.46', '0.65'…	0.699358	['0.62', '0.62', '0.70', '0.67', '0.71', '0.95', '0.65', '0.63', '0.65', '0.78', '0.75', '0.74', '0.67', '0.70', '0.66', '1.41', '0.79', '1.59', '1.03', '0.50', '0.55', '1.34', '1.31', '0.94', '0.92', '0.94', '0.90', '0.70', '1.01', '0.78', '0.88', '0.74', '0.59', '0.35', '0.35', '0.41', '0.29', '0.30', '0.84', '0.47', '0.41', '0.48', '0.57', '0.47', '0.55', '0.88', '0.95', '0.98', '0.71', '0.54'…	1.02214	['0.57', '0.59', '0.64', '0.57', '0.58', '0.58', '0.45', '0.43', '0.49', '0.52', '0.64', '0.60', '1.03', '0.72', '0.84', '0.42', '0.44', '0.40', '0.14', '0.14', '0.15', '0.28', '0.30', '0.29', '0.32', '0.32', '0.28', '0.63', '0.62', '0.59', '0.53', '0.63', '0.88', '0.79', '0.78', '0.95', '1.01', '1.15', '1.19', '0.54', '0.69', '0.63', '0.58', '0.55', '0.86', '0.44', '0.47', '0.38', '0.68', '1.22'…	0.609943	['0.85', '0.85', '0.86', '0.87', '0.86', '0.88', '0.71', '0.71', '0.68', '0.66', '0.76', '0.69', '1.33', '1.51', '1.84', '0.78', '0.79', '0.74', '0.69', '0.67', '0.67', '0.71', '0.68', '0.69', '0.54', '0.35', '0.40', '1.01', '1.01', '1.07', '1.02', '0.77', '1.34', '1.49', '1.62', '0.78', '0.40', '0.74', '0.60', '1.94', '1.48', '1.18', '0.39', '0.41', '0.33', '0.31', '0.30', '1.04', '0.81', '1.09'…	0.812397
sp|A7ZV11|CH10_ECO24	A7ZV11	10 kDa chaperonin OS=Escherichia coli O139:H28 (strain E24377A / ETEC) GN=groS PE=3 SV=1	groS	0.950852	['0.78', '0.84', '0.91', '0.61', '0.58', '0.58', '0.54', '0.55', '0.32', '0.97', '1.15', '1.07', '1.55', '1.60', '1.74', '0.61', '0.60', '0.62', '0.50', '0.51', '0.51', '0.64', '0.64', '0.62', '0.55', '0.55', '0.54', '0.54', '0.56', '0.53']	0.684203	['1.30', '1.32', '1.57', '10.50', '11.20', '15.16', '0.56', '0.57', '0.56', '0.57', '0.65', '0.60', '1.78', '1.96', '1.69', '1.69', '1.86', '1.81', '1.99', '1.64', '1.36', '0.87', '0.88', '0.88', '0.86', '0.87', '0.89', '1.45', '1.66', '1.94', '1.02', '1.02', '1.04', '1.01', '1.21', '1.04', '0.95', '0.84', '1.50', '0.99', '0.68', '0.76', '2.16', '2.87', '0.14', '0.22', '1.64', '0.86', '0.53', '1.…	1.19141	['0.98', '0.97', '1.05', '1.08', '1.11', '1.07', '1.68', '1.30', '1.48', '2.09', '1.60', '2.76', '0.82', '0.91', '0.79', '1.85', '1.88', '1.86', '1.19', '1.17', '1.13', '1.19', '1.20', '1.18', '1.09', '1.09', '1.11', '1.11', '1.12', '1.12', '1.18', '1.19', '1.22', '0.97', '0.91', '0.95', '0.50', '1.09', '1.11']	1.17884	['0.98', '1.06', '0.93', '0.93', '1.09', '3.24', '1.00', '0.74', '0.64', '1.10', '0.59', '0.61', '0.94', '0.76', '0.75', '0.93', '0.88', '0.95', '0.84', '0.86', '0.88', '0.68', '0.68', '0.67', '0.67', '0.67', '0.59']	0.850649
sp|P68688|GLRX1_ECOLI	P68688	Glutaredoxin-1 OS=Escherichia coli (strain K12) GN=grxA PE=1 SV=1	grxA	1.19853			['1.33', '0.73', '0.50', '1.19', '1.10', '1.13', '1.30', '1.22', '2.25', '1.74', '1.60', '1.17', '1.24', '2.04', '1.25', '1.69', '1.74', '0.83', '1.52', '1.20', '1.91']	1.29594	['1.19', '1.30', '1.31', '1.35', '1.34', '2.21', '1.18', '1.09', '0.95', '0.94', '0.92', '2.37', '1.28', '0.79', '0.54', '0.87', '0.79', '1.04', '1.03', '0.74', '0.81', '2.68', '0.85', '1.05']	1.10845
sp|P0AC61|GLRX2_ECO57	P0AC61	Glutaredoxin-2 OS=Escherichia coli O157:H7 GN=grxB PE=3 SV=1	grxB	1.10706	['1.91', '1.69', '3.08', '0.26', '0.43', '0.47', '0.31', '1.05', '0.50', '0.56', '0.89', '0.44', '4.24', '1.67', '2.96', '1.73', '1.90', '1.80', '1.54', '1.10', '2.16', '2.61', '1.72', '1.43']	1.184	['1.31', '0.52', '0.33', '0.88', '0.61', '1.07', '1.35', '1.02', '1.42', '0.79', '0.98', '1.17', '0.99', '1.03', '1.25', '0.83', '0.69', '0.84', '0.87', '0.91', '0.74', '1.62', '1.18', '1.55', '1.10', '1.21', '0.80', '0.81', '0.95', '0.24', '2.13', '2.04', '2.00', '2.31', '0.81', '1.54', '1.68', '1.84', '0.99', '1.76', '1.86', '1.58']	1.07292	['1.18', '1.66', '1.18', '1.69', '2.77', '0.89', '0.95', '0.98', '1.00', '1.26', '0.45', '0.34', '0.93', '0.73', '0.24', '3.32', '2.67', '1.08', '3.56', '1.88', '0.89', '2.65', '1.90', '1.62', '1.72', '1.48', '1.19', '0.33', '0.59', '15.39', '1.80', '1.17', '0.38', '0.89', '0.86', '0.90', '1.10', '0.83', '1.40', '0.91', '0.58', '0.86', '0.70', '2.17', '0.71']	1.14275	['1.05', '1.31', '2.69', '0.55', '4.62', '0.60', '0.74', '0.58', '0.42', '0.47', '1.07', '0.48', '1.01', '1.09', '1.33', '1.31', '1.04', '0.78', '0.98', '0.91', '0.81', '2.27', '2.59', '1.17', '2.95', '0.36', '2.72', '0.73', '0.82', '1.08', '0.62', '1.05', '0.80', '0.85', '1.11', '1.05', '1.37', '0.46', '1.57', '1.47', '1.02', '1.19', '1.03', '1.22', '1.14']	1.03468
sp|P0AC63|GLRX3_ECOL6	P0AC63	Glutaredoxin-3 OS=Escherichia coli O6:H1 (strain CFT073 / ATCC 700928 / UPEC) GN=grxC PE=3 SV=2	grxC	1.00398	['0.97', '1.04', '1.18', '0.58', '0.60', '0.58', '0.58', '0.47', '0.86', '0.34', '0.92', '0.30', '0.26', '0.36', '0.19', '0.92', '0.94', '0.92', '0.95', '0.81', '0.91', '0.24', '0.59', '0.73', '0.87', '0.82', '0.80']	0.625853	['1.47', '0.92', '0.72', '1.06', '1.06', '1.08', '1.07', '1.12', '1.16', '1.03', '1.26', '1.07', '2.08', '0.89', '1.77', '0.40', '0.38', '0.45', '2.38', '2.08', '2.24', '2.04', '1.99', '2.67', '2.29', '1.39', '0.81', '1.09', '1.17', '1.14']	1.19878	['0.79', '1.30', '1.57', '0.77', '0.77', '0.77', '5.34', '1.68', '1.85', '10.04', '1.65', '6.25', '0.83', '0.83', '0.84', '0.93', '0.93', '0.89', '0.71', '0.67', '0.64', '0.67', '0.66', '0.62', '0.63', '0.72', '0.65', '0.63', '0.61', '0.65', '0.52', '0.60', '0.82', '0.83', '0.83', '0.81']	0.981076	['1.04', '1.00', '0.97', '1.08', '1.06', '1.09', '1.10', '0.68', '0.68', '3.95', '5.08', '1.38', '3.11', '2.47', '3.97', '0.64', '1.00', '1.04', '0.97', '0.97', '0.90', '2.87', '1.25', '0.87', '1.83', '1.60', '2.20']	1.38033
sp|P0AC70|GLRX4_ECOL6	P0AC70	Glutaredoxin-4 OS=Escherichia coli O6:H1 (strain CFT073 / ATCC 700928 / UPEC) GN=grxD PE=3 SV=1	grxD	0.876395	['1.01', '0.62', '0.99', '0.66', '0.68', '0.66', '0.52', '0.50', '0.47', '0.55', '0.58', '0.60', '1.08', '10.52', '0.30', '0.72', '0.70', '0.72', '0.76', '0.80', '0.71', '0.54', '0.43', '0.34', '0.28', '0.65', '0.38', '0.61', '0.67', '0.78', '1.01', '1.05', '1.17']	0.69101	['1.34', '1.30', '1.54', '1.27', '1.51', '1.25', '0.98', '0.93', '0.92', '0.45', '1.61', '1.74', '0.66', '2.51', '1.25', '1.43', '1.43', '1.38', '1.23', '1.28', '1.21', '1.03', '0.95', '0.61', '0.85', '0.53', '0.39', '0.94', '0.70', '0.74', '1.18', '0.94', '0.90']	1.04233	['6.82', '2.34', '1.74', '0.49', '0.48', '0.48', '0.48', '0.80', '0.76', '0.68', '0.77', '0.74', '0.85', '0.84', '0.83', '0.64', '0.58', '0.43', '1.98', '1.60', '0.66', '0.68', '0.70', '0.71', '0.87', '0.87', '0.91', '0.67', '0.63', '1.55', '1.22', '0.33', '1.51', '1.21', '0.12', '0.64', '0.96', '0.99', '0.95']	0.826162	['0.42', '0.38', '0.35', '1.09', '1.16', '1.23', '1.09', '1.01', '1.07', '1.11', '1.06', '1.07', '0.51', '0.44', '1.28', '2.99', '1.94', '2.92', '0.90', '0.95', '0.93', '0.89', '0.77', '0.87', '0.95', '0.93', '0.97', '0.85', '0.77', '0.80', '1.34', '1.26', '0.97', '1.21', '1.09', '1.14', '1.37', '1.23', '1.30']	0.991393
sp|B7UGU5|GUAA_ECO27	B7UGU5	GMP synthase [glutamine-hydrolyzing] OS=Escherichia coli O127:H6 (strain E2348/69 / EPEC) GN=guaA PE=3 SV=1	guaA	0.907035	['0.57', '0.54', '0.57', '0.68', '0.74', '0.75', '0.93', '1.00', '0.99', '1.10', '0.81', '0.59', '0.71', '0.70', '0.77', '0.71', '0.61', '0.90', '0.92', '0.67', '0.67', '0.89', '1.44', '1.82', '0.72', '0.70', '0.45', '0.73', '0.80', '0.95', '0.74', '0.80', '0.98', '0.64', '0.62', '0.62', '0.69', '0.35', '0.65', '0.38', '0.61', '0.38', '0.80', '0.83', '0.81', '0.61', '0.58', '0.66', '0.52', '0.58'…	0.72053	['0.70', '0.74', '0.88', '1.26', '1.34', '1.10', '0.90', '1.11', '0.87', '1.34', '1.48', '1.44', '1.16', '1.23', '0.48', '1.67', '1.13', '1.24', '1.12', '1.00', '1.79', '0.25', '1.59', '1.27', '0.94', '1.04', '0.87', '0.39', '0.46', '0.53', '1.17', '1.22', '1.14', '1.18', '1.21', '1.13', '0.81', '0.82', '0.88', '0.75', '0.85', '0.61', '0.90', '0.97', '1.16', '0.51', '1.30', '2.03', '1.38', '3.71'…	1.03714	['0.67', '0.67', '0.69', '0.70', '0.72', '0.70', '0.82', '0.90', '0.95', '0.61', '0.75', '0.59', '0.18', '0.52', '0.40', '0.45', '0.47', '0.34', '0.50', '0.80', '0.82', '0.71', '0.75', '0.70', '0.72', '0.75', '0.85', '0.71', '0.60', '1.20', '0.40', '0.40', '0.39', '0.62', '0.63', '0.64', '0.75', '0.71', '0.69', '0.55', '0.53', '0.56', '0.50', '0.51', '0.54', '1.20', '1.43', '1.82', '0.63', '0.61'…	0.698277	['0.72', '1.07', '1.14', '1.60', '1.59', '1.54', '1.57', '1.44', '1.66', '1.21', '1.48', '0.80', '0.94', '1.38', '0.71', '1.44', '1.57', '2.06', '1.62', '1.84', '1.60', '0.94', '0.68', '1.19', '1.55', '1.52', '1.51', '0.98', '1.02', '0.25', '1.80', '0.95', '2.16', '1.76', '1.69', '1.72', '1.96', '1.32', '1.43', '2.00', '0.89', '0.85', '1.50', '1.50', '1.69', '1.57', '1.48', '1.35', '1.44', '1.39'…	1.29712
sp|P0ADG7|IMDH_ECOLI	P0ADG7	Inosine-5'-monophosphate dehydrogenase OS=Escherichia coli (strain K12) GN=guaB PE=1 SV=1	guaB	1.0623	['1.37', '1.43', '1.29', '1.30', '1.24', '1.23', '1.11', '1.09', '1.11', '1.32', '1.28', '1.40', '0.85', '1.04', '1.37', '1.02', '1.00', '1.04', '0.86', '1.20', '0.91', '1.06', '1.11', '1.12', '0.78', '0.80', '0.79', '0.84', '0.95', '1.03', '0.71', '0.75', '0.90', '0.95', '0.99', '0.99', '0.81', '0.87', '1.04', '0.76', '0.65', '0.90', '1.07', '1.13', '0.87', '1.00', '0.78', '0.48', '1.51', '0.93'…	0.985039	['1.75', '1.91', '1.83', '1.63', '0.50', '0.96', '1.23', '1.14', '1.21', '0.89', '1.02', '0.97', '0.68', '0.85', '1.43', '1.28', '0.44', '0.43', '9.78', '8.42', '7.45', '1.13', '2.43', '1.88', '1.27', '1.24', '1.28', '1.14', '1.15', '1.35', '1.31', '1.06', '1.55', '0.40', '0.38', '0.37', '1.00', '2.03', '2.49', '0.98', '0.92', '0.91', '0.29', '0.27', '0.40', '1.26', '1.06', '1.28', '2.37', '0.09'…	1.17606	['0.54', '0.48', '0.62', '2.62', '1.79', '0.59', '0.37', '0.41', '0.43', '0.73', '0.75', '0.73', '0.69', '0.83', '0.16', '0.73', '0.76', '0.71', '0.30', '0.23', '0.24', '0.76', '0.75', '0.75', '0.70', '0.75', '0.72', '0.55', '1.09', '0.62', '0.59', '0.75', '1.01', '1.22', '1.12', '0.62', '1.16', '1.15', '1.14', '0.89', '1.07', '0.82', '0.98', '0.50', '0.51', '0.14', '0.15', '0.18', '0.39', '0.42'…	0.76573	['1.10', '1.55', '1.12', '2.04', '1.29', '0.89', '1.56', '1.35', '1.39', '1.34', '1.43', '1.29', '1.37', '1.32', '1.46', '1.31', '1.50', '1.67', '1.24', '1.38', '0.90', '1.39', '1.45', '1.03', '1.68', '1.61', '1.46', '1.71', '1.73', '1.69', '0.98', '0.92', '0.95', '0.78', '0.59', '0.63', '9.49', '6.24', '5.40', '2.29', '2.21', '2.07', '1.36', '1.25', '1.18', '1.31', '1.33', '0.70', '1.49', '1.45'…	1.43559
sp|P0AES6|GYRB_ECOLI	P0AES6	DNA gyrase subunit B OS=Escherichia coli (strain K12) GN=gyrB PE=1 SV=2	gyrB	0.893817	['0.56', '0.83', '0.78', '0.60', '0.47', '0.39', '1.05', '0.42', '0.71', '0.64', '0.65', '0.58', '1.74', '0.31', '1.21', '0.57', '0.51', '0.28', '1.33', '0.88', '1.08', '0.92', '0.76', '0.77', '0.52', '0.58', '0.59', '1.02', '0.75', '0.84', '0.55', '0.88', '0.64', '0.64', '0.53', '0.41', '1.12', '0.75', '0.70', '0.90', '0.95', '0.98']	0.696265	['0.66', '0.80', '1.15', '1.04', '0.66', '0.82', '1.57', '1.08', '0.74', '0.88', '0.66', '1.05', '1.07', '0.94', '0.82', '0.72', '1.19', '0.70', '0.78', '0.71', '0.50', '2.57', '3.15', '4.22', '0.19', '0.44', '1.53', '1.06', '1.30', '1.32', '1.17', '0.48', '0.98', '0.73', '0.75', '0.70', '1.17', '0.84', '0.96', '1.13', '0.66', '0.77', '0.98', '1.70', '0.66', '0.61', '1.02', '0.71', '0.49', '0.51'…	0.931418	['0.64', '0.45', '0.61', '0.41', '0.63', '0.66', '0.83', '0.88', '1.37', '0.31', '1.12', '0.94', '0.35', '0.42', '0.39', '1.46', '1.86', '2.19', '0.44', '0.68', '0.43', '0.73', '1.11', '0.79', '0.63', '0.94', '0.52', '10.68', '10.24', '0.80', '0.44', '0.61', '0.45', '1.26', '1.06', '0.78', '0.81', '1.47', '0.80', '11.48', '1.17', '2.37', '0.38', '0.59', '0.62', '1.20', '1.61', '1.52', '0.94', '0.…	0.846113	['1.84', '1.98', '2.18', '1.31', '1.91', '1.59', '2.54', '0.46', '0.14', '1.02', '1.18', '1.27', '2.30', '1.57', '1.48', '1.50', '0.92', '3.69', '1.08', '1.32', '0.79', '0.60', '0.44', '0.59', '0.92', '0.97', '1.02', '1.30', '1.22', '1.09', '2.04', '1.23', '1.57', '1.21', '1.31', '1.45', '1.16', '1.07', '1.03', '0.92', '0.75', '4.14', '1.88', '3.13', '4.05', '1.27', '1.29', '1.18', '1.26', '1.63'…	1.16318
sp|P0AET0|HDEA_ECO57	P0AET0	Acid stress chaperone HdeA OS=Escherichia coli O157:H7 GN=hdeA PE=3 SV=1	hdeA	1.40012	['2.98', '3.30', '3.26', '2.95', '2.34', '2.38', '0.15', '0.28', '0.26', '1.35', '1.35', '1.35', '1.30', '1.29', '1.31', '0.94', '1.23', '1.20', '1.79', '0.54', '1.60', '0.31', '1.11', '0.93', '0.35', '0.26', '0.57', '1.27', '0.25', '0.83', '0.59', '0.65', '0.43', '4.31', '0.68', '0.59', '2.17', '2.21', '2.23']	0.998211	['0.15', '0.98', '0.34', '0.24', '1.18', '3.57', '2.62', '0.80', '2.53', '3.02', '4.73', '4.35', '15.06', '16.33', '15.93', '12.51', '12.01', '11.46', '10.60', '8.32', '5.47', '0.58', '1.20', '1.63', '0.82', '1.86', '0.85', '1.33', '1.05', '1.92', '2.40', '2.35', '2.35', '2.29', '2.28', '2.29', '2.67', '2.78', '3.11', '2.12', '11.48', '2.55', '4.43', '20.91', '5.12', '0.35', '1.73', '0.17', '2.66…	2.42367	['2.55', '1.24', '0.68', '1.26', '1.25', '1.27', '1.90', '1.89', '1.90', '2.45', '2.51', '2.33', '0.82', '1.07', '0.78', '1.08', '1.24', '1.17', '0.74', '0.89', '0.63', '1.77', '1.21', '1.43', '1.04', '1.32', '1.20', '1.54', '1.52', '2.64']	1.33514	['0.94', '0.98', '1.52', '0.92', '0.91', '0.92', '1.14', '1.16', '1.08', '0.43', '0.74', '0.46', '1.02', '1.00', '0.99', '1.09', '1.01', '0.97', '0.86', '1.08', '1.13', '0.94', '0.59', '0.75', '4.23', '3.00', '3.68', '3.12', '3.67', '3.23']	1.1897
sp|B7ULH4|HLDD_ECO27	B7ULH4	ADP-L-glycero-D-manno-heptose-6-epimerase OS=Escherichia coli O127:H6 (strain E2348/69 / EPEC) GN=hldD PE=3 SV=1	hldD	0.790806	['0.77', '0.67', '0.63', '0.66', '0.65', '0.33', '0.52', '0.65', '1.74', '0.73', '0.65', '1.21', '0.74', '0.81', '0.52', '0.65', '0.49', '1.21', '0.51', '0.54', '0.54', '0.52', '0.70', '0.87', '0.51', '0.50', '0.58', '2.90', '0.61', '0.25', '1.14', '1.09', '1.07', '1.23', '0.94', '0.95', '0.34', '0.44', '0.33', '1.00', '0.75', '0.34', '0.52', '0.72', '0.66', '0.33', '0.12', '0.16', '0.49', '0.58'…	0.618386	['0.76', '0.85', '0.90', '0.32', '0.53', '0.70', '0.95', '0.74', '0.75', '0.49', '0.44', '0.71', '1.28', '1.32', '2.05', '0.82', '0.93', '1.56', '1.01', '0.73', '0.43', '0.53', '0.79', '1.19', '0.99', '0.77', '1.42', '1.20', '1.12', '3.92', '1.28', '0.85', '1.12', '0.71', '0.79', '0.72', '1.19', '1.24', '0.91', '0.62', '0.70', '0.81', '0.71', '0.95', '0.97', '0.98', '0.84', '1.07', '0.38', '0.49'…	0.780542	['0.65', '0.73', '0.88', '0.55', '0.54', '0.44', '0.60', '0.53', '0.72', '0.97', '1.32', '1.89', '1.06', '0.71', '0.80', '0.63', '0.71', '3.25', '0.76', '0.70', '0.82', '0.57', '0.71', '0.55', '0.82', '0.65', '0.67', '0.68', '0.57', '0.68', '0.86', '0.71', '0.70', '0.83', '0.71', '1.07', '0.67', '0.97', '0.71', '0.87', '0.67', '1.03', '0.69', '0.75', '0.55', '0.37', '0.75', '0.43', '0.51', '0.54'…	0.724748	['0.62', '0.71', '1.02', '1.18', '1.04', '1.12', '0.71', '0.92', '2.50', '0.67', '0.61', '0.70', '0.59', '0.78', '0.61', '22.72', '30.58', '1.79', '1.82', '1.30', '1.67', '2.38', '2.22', '3.34', '1.06', '1.14', '0.73', '0.99', '1.04', '0.82', '1.30', '1.43', '1.37', '0.55', '0.52', '0.62', '0.88', '0.84', '0.80', '0.34', '1.62', '9.18', '0.78', '0.19', '0.79', '0.94', '1.02', '0.89', '0.87', '0.9…	1.11798
sp|B7UIW0|HLDE_ECO27	B7UIW0	Bifunctional protein HldE OS=Escherichia coli O127:H6 (strain E2348/69 / EPEC) GN=hldE PE=3 SV=1	hldE	0.808686	['0.80', '0.74', '1.28', '0.64', '0.66', '0.60', '0.91', '0.67', '1.03', '0.77', '0.54', '0.49', '0.68', '0.61', '0.55', '0.58', '0.54', '0.36', '0.57', '0.66', '0.61', '0.68', '0.76', '0.83', '0.16', '0.18', '0.18', '0.52', '0.50', '0.69', '1.04', '0.86', '0.54', '0.65', '0.59', '0.63', '0.69', '0.69', '0.92', '0.51', '0.52', '0.34']	0.591622	['1.16', '0.86', '0.44', '0.77', '0.59', '1.00', '0.63', '0.82', '0.88', '0.88', '0.98', '1.21', '0.82', '1.12', '0.49', '1.50', '1.05', '1.45', '0.63', '0.85', '0.83', '0.99', '0.98', '1.02', '0.65', '0.62', '1.04', '1.14', '1.47', '0.99', '0.74', '0.93', '0.76', '0.81', '1.21', '0.61', '9.04', '8.60', '5.39', '0.41', '1.07', '0.63', '1.58', '1.40', '0.98', '0.65', '0.66', '0.90', '0.44', '0.40'…	0.937614	['1.10', '1.91', '2.36', '0.88', '0.51', '0.67', '0.56', '0.48', '0.58', '0.51', '0.62', '0.43', '1.00', '0.92', '0.61', '0.89', '0.66', '2.29', '0.42', '0.57', '0.92', '0.70', '0.88', '1.85', '0.78', '0.57', '1.45', '0.63', '0.65', '0.68', '0.40', '0.41', '0.60', '0.74', '1.45', '0.58', '1.76', '1.96', '1.19', '0.37', '0.37', '0.55']	0.772687	['1.48', '1.52', '1.53', '0.94', '0.54', '0.54', '0.91', '0.92', '0.92', '1.04', '1.20', '1.12', '0.90', '0.98', '0.69', '1.33', '2.05', '0.97', '0.52', '1.15', '1.47', '1.12', '0.91', '1.34', '1.10', '1.20', '0.85', '0.60', '0.65', '0.70', '0.78', '1.13', '0.80', '0.81', '0.60', '0.81', '1.08', '2.10', '1.48', '0.59', '0.59', '0.80', '0.48', '0.49', '0.88', '1.35', '0.88', '0.47', '1.31', '1.10'…	0.997808
sp|P0ACF9|HNS_ECOL6	P0ACF9	DNA-binding protein H-NS OS=Escherichia coli O6:H1 (strain CFT073 / ATCC 700928 / UPEC) GN=hns PE=3 SV=2	hns	0.739914	['0.49', '0.49', '0.48', '0.45', '0.46', '0.43', '0.58', '0.56', '0.56', '0.54', '0.54', '0.62', '1.02', '1.00', '1.05', '0.85', '0.84', '0.85', '0.77', '0.75', '0.78', '0.60', '0.59', '1.13', '0.87', '0.86', '0.85', '0.86', '0.91', '0.88', '0.29', '0.75', '1.08', '0.81', '0.83', '0.83', '0.87', '0.91', '0.92', '0.70', '0.69', '0.70', '0.61', '0.67', '0.50', '0.47', '0.50', '0.50', '0.68', '0.71'…	0.685856	['0.92', '0.93', '0.94', '0.53', '0.49', '0.47', '1.23', '1.32', '1.32', '1.67', '1.51', '0.83', '5.37', '2.42', '4.65', '1.98', '1.82', '2.20', '0.63', '0.63', '0.78', '0.98', '0.98', '1.11', '0.64', '0.65', '0.66', '1.00', '1.07', '1.44', '7.96', '7.65', '7.55', '5.32', '3.91', '4.43', '0.20', '3.88', '5.00', '3.86', '3.76', '3.49', '2.55', '2.67', '2.39', '1.80', '1.72', '2.23', '1.26', '2.34'…	1.34879	['0.36', '0.37', '0.40', '0.44', '0.43', '0.44', '0.60', '0.86', '0.64', '0.73', '0.66', '0.52', '0.29', '0.42', '0.27', '0.47', '0.67', '0.46', '0.17', '0.14', '0.11', '0.18', '0.30', '0.27', '0.53', '0.53', '0.59', '0.65', '0.65', '0.57', '0.64', '0.66', '0.65', '0.67', '0.71', '0.83', '0.03', '0.03', '0.04', '0.15', '0.20', '0.16', '0.39', '0.42', '0.35', '0.16', '0.16', '0.16', '0.27', '0.28'…	0.363657	['0.87', '0.91', '0.87', '0.87', '0.89', '0.87', '1.33', '1.79', '2.65', '1.36', '2.62', '0.93', '0.13', '0.15', '0.11', '0.23', '0.12', '0.18', '0.87', '2.23', '1.03', '0.98', '0.97', '1.05', '0.76', '0.82', '0.76', '0.89', '0.87', '0.96', '0.95', '0.93', '0.95', '0.81', '0.79', '0.82', '1.02', '0.92', '0.93', '1.32', '1.25', '1.13', '0.94', '0.94', '1.01', '1.02', '0.89', '0.82', '0.84', '0.76'…	0.890958
sp|A7ZPW9|HSCA_ECO24	A7ZPW9	Chaperone protein HscA OS=Escherichia coli O139:H28 (strain E24377A / ETEC) GN=hscA PE=3 SV=1	hscA	0.803021	['5.16', '3.26', '3.64', '0.45', '1.58', '1.38', '1.18', '0.76', '0.64', '0.55', '0.61', '0.44', '2.37', '0.10', '0.68', '0.67', '0.93', '0.63', '0.75', '0.61', '0.70']	0.896606	['0.59', '0.49', '0.66', '0.47', '0.48', '1.56', '0.07', '0.18', '0.92', '0.93', '2.75', '2.86', '0.85', '0.95', '1.13', '0.58', '0.53', '0.52', '0.90', '1.65', '0.79', '1.80', '7.38', '4.18', '0.48', '0.60', '0.51', '0.77', '0.55', '0.40', '0.35', '2.71', '0.90', '2.34', '0.95', '0.76', '1.17', '1.04', '1.28', '1.34', '1.36', '5.12', '0.84', '1.42', '1.87', '0.71', '0.72', '0.45', '1.04', '6.50'…	0.924958	['0.30', '0.48', '0.52', '0.35', '0.32', '0.30', '0.83', '0.33', '0.64', '2.34', '0.54', '0.95', '0.88', '0.78', '1.07', '0.94', '0.93', '0.62']	0.623585	['0.86', '0.90', '2.06', '0.50', '0.57', '0.34', '0.46', '0.53', '1.49', '0.63', '0.79', '0.79', '0.51', '0.73', '0.67', '0.56', '0.34', '0.33', '1.29', '1.08', '0.84', '1.06', '0.34', '0.51', '0.63', '0.69', '1.63', '0.67', '0.45', '0.44', '1.91', '1.60', '1.59', '1.74', '0.59', '0.76', '1.86', '1.59', '1.09', '0.51', '0.29', '1.52', '0.95', '0.76', '0.96', '1.38', '1.84', '0.84']	0.80406
sp|B7UNQ1|HSLU_ECO27	B7UNQ1	ATP-dependent protease ATPase subunit HslU OS=Escherichia coli O127:H6 (strain E2348/69 / EPEC) GN=hslU PE=3 SV=1	hslU	0.817828	['0.73', '1.01', '0.67', '0.63', '0.66', '0.64', '0.64', '0.36', '0.27', '2.58', '1.90', '5.01', '1.18', '1.07', '0.83', '0.63', '0.53', '2.91', '0.67', '0.43', '0.79', '0.52', '0.56', '0.53', '0.59', '0.42', '0.43', '0.91', '0.86', '0.92', '0.57', '0.51', '0.47', '0.76', '0.70', '0.87', '0.97', '0.52', '0.76', '0.58', '0.84', '0.73', '0.46', '0.39', '0.51', '0.62', '0.69', '0.64', '0.48', '0.71'…	0.744578	['0.40', '0.80', '0.74', '1.19', '1.69', '1.17', '1.10', '1.45', '1.02', '1.46', '0.86', '4.28', '0.34', '0.25', '0.27', '0.78', '1.00', '2.49', '0.38', '1.08', '0.64', '0.50', '0.61', '0.34', '0.54', '0.86', '1.44', '0.51', '0.67', '0.45', '0.54', '0.66', '0.61', '1.00', '0.69', '0.58', '0.78', '0.71', '1.03', '0.48', '0.47', '0.59', '5.69', '4.62', '7.05', '0.53', '0.54', '0.62', '0.34', '0.37'…	0.776361	['2.75', '2.69', '2.10', '0.52', '0.63', '0.60', '1.14', '0.93', '0.71', '0.40', '0.44', '0.86', '1.16', '1.35', '5.02', '0.57', '0.37', '0.48', '1.90', '1.63', '1.22', '1.40', '1.28', '2.40', '0.69', '0.86', '0.87', '0.56', '0.58', '0.69', '0.72', '0.72', '0.70', '0.55', '0.87', '0.73', '1.92', '2.90', '1.42', '0.11', '0.23', '0.31', '0.28', '0.21', '0.24', '0.55', '0.59', '0.57', '0.74', '0.57'…	0.801964	['0.75', '0.65', '0.52', '0.91', '10.52', '2.56', '1.63', '1.97', '1.20', '1.02', '1.01', '1.72', '1.13', '0.66', '0.99', '1.29', '0.92', '1.18', '0.82', '0.90', '0.82', '1.23', '1.01', '1.60', '0.89', '0.51', '0.60', '0.39', '0.57', '0.75', '0.75', '0.62', '0.93', '1.09', '1.01', '1.10', '0.57', '0.96', '0.97', '1.26', '0.64', '0.53', '1.18', '1.28', '1.40', '1.33', '1.76', '2.48', '0.97', '0.94…	0.96498
sp|P0A6Z5|HTPG_ECO57	P0A6Z5	Chaperone protein HtpG OS=Escherichia coli O157:H7 GN=htpG PE=3 SV=1	htpG	0.620313	['0.31', '0.24', '0.52', '0.30', '0.36', '0.36', '0.25', '0.27', '0.40', '0.35', '0.36', '0.33', '0.44', '0.38', '0.46', '0.51', '0.39', '0.50', '0.53', '0.51', '0.54', '0.36', '0.81', '1.11', '0.36', '0.39', '0.70', '0.61', '0.74', '0.65', '0.82', '0.64', '0.63', '1.24', '1.68', '1.34', '0.35', '0.39', '0.36', '0.33', '0.29', '0.34', '0.58', '0.52', '0.59', '0.70', '0.42', '0.45', '0.35', '0.29'…	0.498529	['0.68', '0.66', '1.29', '0.53', '0.53', '0.90', '0.33', '0.36', '0.73', '0.50', '0.50', '0.48', '0.20', '0.26', '0.24', '0.94', '0.74', '1.05', '0.21', '0.34', '1.52', '0.41', '0.41', '0.52', '0.56', '0.67', '0.57', '0.85', '1.46', '0.64', '1.93', '2.73', '1.62', '0.71', '1.16', '0.78', '0.47', '0.52', '0.48', '0.42', '0.19', '0.26', '0.10', '0.99', '1.02', '0.43', '0.20', '0.35', '0.16', '0.17'…	0.62861	['0.77', '0.64', '1.46', '0.33', '0.50', '0.27', '0.43', '0.40', '0.89', '0.42', '0.42', '0.41', '0.80', '0.86', '0.95', '1.09', '1.03', '0.44', '0.43', '0.60', '0.91', '0.51', '0.52', '0.55', '0.68', '0.76', '0.63', '0.49', '1.30', '1.01', '0.49', '0.52', '0.55', '0.79', '0.70', '0.74', '0.56', '0.40', '0.38', '0.38', '0.55', '0.33', '0.41', '0.31', '0.34', '0.49', '0.46', '0.52', '0.68', '0.64'…	0.49928	['0.45', '0.60', '0.37', '18.25', '18.28', '13.04', '1.79', '1.88', '3.39', '0.80', '0.79', '0.79', '0.55', '0.79', '0.46', '2.00', '2.00', '0.82', '0.75', '0.79', '0.90', '1.01', '1.42', '0.46', '0.47', '0.75', '0.99', '1.05', '1.39', '1.22', '0.55', '0.42', '0.43', '0.58', '0.26', '3.04', '2.40', '2.38', '1.40', '1.65', '0.92', '0.72', '1.03', '0.99', '0.70', '0.79', '0.47', '0.92', '0.44', '0.…	0.9463
sp|P0ACF2|DBHA_ECO57	P0ACF2	DNA-binding protein HU-alpha OS=Escherichia coli O157:H7 GN=hupA PE=3 SV=1	hupA	0.896649	['0.36', '0.36', '0.36', '0.84', '0.33', '0.82', '1.30', '0.69', '0.86', '0.39', '0.38', '0.40', '0.36', '0.35', '0.37', '0.31', '0.32', '0.32', '0.31', '0.34', '0.23', '0.32', '0.33', '0.31', '0.27', '0.25', '2.39']	0.426115	['1.22', '1.22', '1.24', '3.38', '4.79', '0.86', '2.04', '3.86', '1.08', '1.29', '1.29', '1.29', '1.20', '1.16', '1.25', '0.49', '0.07', '0.86', '21.35', '21.95', '22.37', '13.28', '16.26', '17.15', '0.57', '0.31', '5.19', '1.17', '1.57', '1.25', '1.25', '1.23', '1.21', '1.23', '1.20', '1.44', '1.00', '1.02', '1.02', '1.04', '0.94', '1.70']	1.74271	['1.07', '1.07', '1.07', '0.68', '0.72', '0.72', '0.72', '0.86', '0.85', '0.67', '0.68', '0.69', '0.79', '0.76', '0.77', '0.64', '0.64', '0.65', '0.67', '0.68', '0.68', '0.87', '0.80', '0.93', '1.03', '1.05', '1.05', '1.16', '1.15', '1.10', '1.14', '1.07', '1.58', '0.97', '0.96', '0.96', '0.99', '1.01', '1.45']	0.881681	['0.51', '0.24', '0.61', '1.29', '1.21', '1.18', '1.00', '2.41', '1.02', '0.87', '1.17', '0.99', '1.07', '1.05', '1.03', '0.88', '0.91', '0.75', '0.65', '0.64', '0.62', '0.59', '0.57', '0.60', '0.56', '0.44', '0.55', '0.97', '0.98', '1.02', '1.31', '1.07', '1.29', '1.72', '1.06', '1.17', '2.07', '2.00', '1.97', '1.95', '2.14', '2.76']	0.987248
sp|P0ACF6|DBHB_ECO57	P0ACF6	DNA-binding protein HU-beta OS=Escherichia coli O157:H7 GN=hupB PE=3 SV=1	hupB	0.881568	['3.22', '1.13', '2.05', '0.25', '0.97', '2.10', '0.65', '0.70', '0.72', '0.36', '0.73', '0.34', '0.56', '0.52', '0.68', '0.25', '0.30', '0.53', '0.28', '0.24', '0.52', '0.51', '0.61', '0.54']	0.602813	['1.25', '1.87', '0.81', '2.61', '3.90', '1.88', '1.34', '1.36', '1.46', '1.28', '1.63', '1.35', '1.02', '1.15', '1.19', '7.08', '7.77', '2.00', '1.56', '2.37', '1.32', '0.44', '0.44', '0.49', '1.24', '0.64', '0.65', '1.55', '1.49', '0.97', '1.07', '1.46', '0.77', '0.69', '7.58', '0.59', '2.61', '3.22', '1.94', '0.49', '3.09', '3.77', '1.09', '1.09', '1.11']	1.43109	['0.52', '0.55', '0.94', '0.58', '0.56', '0.78', '1.15', '1.06', '0.91', '0.54', '1.02', '1.07', '0.55', '0.70', '0.54', '0.73', '0.75', '1.82', '0.32', '0.37', '0.47', '0.79', '0.68', '0.80', '1.40', '1.63', '0.95', '0.78', '0.63', '0.47', '0.77', '0.80', '0.68', '0.82', '0.91', '0.91', '0.56', '0.50', '0.55', '0.68', '0.64', '0.67', '0.79', '0.79', '0.80']	0.728999	['0.58', '0.89', '0.58', '1.20', '1.16', '0.84', '1.22', '1.22', '1.22', '1.12', '0.63', '0.98', '0.84', '0.91', '0.76', '0.48', '0.45', '0.82', '0.44', '0.30', '0.38', '1.09', '0.94', '0.47', '0.99', '1.13', '1.09', '1.21', '0.75', '0.69', '6.94', '6.55', '5.08', '1.65', '1.20', '0.90', '0.69', '0.94', '0.92', '0.92', '1.02', '0.97']	0.96039
sp|P08200|IDH_ECOLI	P08200	Isocitrate dehydrogenase [NADP] OS=Escherichia coli (strain K12) GN=icd PE=1 SV=1	icd	1.4381	['5.99', '6.00', '6.60', '16.46', '7.99', '5.18', '0.77', '1.56', '0.56', '2.95', '1.95', '2.21', '3.97', '3.59', '3.70', '1.95', '5.06', '1.71', '2.24', '3.84', '3.57', '2.21', '1.69', '1.84', '2.78', '3.59', '0.77', '3.48', '4.95', '1.15', '1.68', '3.93', '1.82', '2.29', '0.78', '0.46', '2.95', '1.77', '2.46', '1.10', '2.87', '1.52', '1.30', '2.72', '0.54', '1.97', '1.46', '1.10', '2.28', '2.00…	2.68568	['7.08', '6.94', '6.95', '3.24', '1.94', '2.20', '1.34', '1.10', '1.47', '2.62', '2.05', '2.18', '5.01', '5.45', '4.75', '7.29', '2.02', '2.53', '1.64', '2.97', '1.36', '0.53', '0.56', '0.55', '1.55', '1.80', '0.77', '0.99', '1.51', '0.39', '4.85', '4.79', '3.17', '1.24', '1.54', '0.99', '0.58', '0.64', '0.56', '0.82', '1.90', '0.65', '0.86', '1.56', '0.31', '1.05', '0.87', '0.44', '1.54', '1.59'…	1.58057	['0.43', '0.41', '0.41', '1.32', '1.04', '0.04', '1.30', '1.25', '1.33', '0.95', '0.98', '0.79', '0.61', '0.66', '0.71', '0.25', '0.40', '0.25', '1.07', '0.91', '0.89', '0.59', '0.55', '0.63', '1.26', '1.26', '0.42', '1.07', '0.98', '1.13', '0.71', '0.77', '0.58', '0.89', '0.96', '0.74', '1.27', '0.74', '0.25', '19.24', '0.24', '9.92', '0.31', '0.12', '0.30', '0.58', '0.57', '0.60', '1.04', '1.23…	0.739685	['1.65', '1.57', '1.57', '1.88', '1.84', '1.88', '1.05', '0.71', '0.61', '1.61', '1.76', '1.60', '1.72', '1.55', '1.60', '1.16', '1.38', '0.99', '1.62', '1.61', '1.43', '2.34', '2.26', '2.00', '2.86', '2.85', '0.87', '1.03', '1.09', '0.72', '1.56', '1.68', '1.20', '0.81', '0.87', '0.88', '1.09', '1.44', '0.94', '0.64', '0.73', '1.42', '0.48', '0.70', '1.05', '1.61', '1.56', '1.82', '1.20', '1.29'…	1.3622
sp|A7ZMI0|IHFA_ECO24	A7ZMI0	Integration host factor subunit alpha OS=Escherichia coli O139:H28 (strain E24377A / ETEC) GN=ihfA PE=3 SV=1	ihfA	0.741116	['0.39', '0.37', '0.40', '0.74', '1.55', '1.50', '0.14', '0.15', '0.14', '0.21', '0.21', '0.23', '1.11', '0.97', '0.78', '1.32', '1.32', '0.89', '0.63', '0.63', '0.74']	0.521592	['1.01', '1.03', '1.06', '1.11', '1.07', '1.24', '0.17', '0.18', '0.18', '0.82', '0.88', '0.53', '0.85', '1.17', '0.46', '3.93', '0.84', '1.01', '0.31', '0.51', '1.00', '0.80', '0.79', '0.80', '1.02', '0.99', '1.02', '0.91', '0.97', '1.09', '1.24', '1.38', '1.27', '0.74', '0.68', '0.65']	0.797811	['0.87', '0.89', '0.88', '1.83', '1.83', '1.76', '0.49', '0.47', '0.44', '0.65', '0.61', '0.71', '0.26', '0.76', '0.31', '0.41', '0.49', '0.16', '1.99', '0.73', '1.03', '0.71', '0.57', '0.63', '0.58', '0.58', '0.57', '0.75', '0.74', '0.74']	0.673203	['0.96', '0.90', '0.99', '0.69', '0.81', '0.59', '0.77', '1.08', '0.18', '1.39', '1.38', '1.31', '1.00', '1.84', '10.49', '1.22', '1.23', '1.26']	1.07688
sp|B7UMZ8|IHFB_ECO27	B7UMZ8	Integration host factor subunit beta OS=Escherichia coli O127:H6 (strain E2348/69 / EPEC) GN=ihfB PE=3 SV=1	ihfB	0.882896	['1.25', '1.12', '0.77', '1.00', '0.89', '1.06', '0.91', '0.83', '0.96', '0.24', '0.22', '0.34', '0.38', '0.42', '0.40']	0.624934	['5.24', '4.75', '4.62', '3.50', '2.59', '3.91', '0.76', '0.76', '0.77', '0.92', '0.94', '0.92', '1.00', '0.74', '0.73', '0.84', '0.87', '0.91', '1.48', '1.58', '1.17']	1.41228	['0.54', '0.54', '1.01', '0.56', '0.58', '0.59', '0.83', '0.85', '0.84', '0.83', '0.90', '0.98', '1.00', '1.04', '1.07', '0.76', '0.90', '1.03', '0.52', '0.59', '2.09', '1.16', '1.38', '0.98', '0.97', '0.70', '1.21']	0.857605	['1.35', '1.47', '0.92', '0.85', '0.77', '0.74', '0.46', '0.56', '0.74', '0.54', '0.55', '0.66', '1.08', '1.09', '0.91', '0.89', '0.92', '0.83', '0.73', '0.75', '0.76']	0.802779
sp|B7UI71|SYI_ECO27	B7UI71	Isoleucine--tRNA ligase OS=Escherichia coli O127:H6 (strain E2348/69 / EPEC) GN=ileS PE=3 SV=1	ileS	0.893019	['0.80', '1.02', '0.58', '1.06', '0.89', '0.97', '0.63', '0.62', '0.58', '0.78', '0.76', '1.10', '1.21', '0.90', '0.87', '0.75', '0.57', '0.51', '0.58', '2.27', '0.56', '0.60', '0.84', '0.36', '0.58', '0.75', '0.48', '0.98', '0.82', '0.88', '2.18', '1.06', '1.83', '0.95', '1.07', '0.88', '0.74', '0.82', '0.60', '1.20', '0.41', '0.90', '2.66', '0.22', '0.67', '0.71', '0.69', '0.60', '0.75', '1.46'…	0.847974	['0.55', '1.70', '1.48', '1.01', '1.00', '1.29', '0.67', '1.06', '0.69', '1.13', '1.10', '1.21', '0.71', '0.65', '0.87', '0.42', '0.33', '0.58', '0.83', '1.11', '1.24', '0.58', '0.72', '0.79', '0.60', '0.70', '1.52', '0.40', '0.68', '0.44', '1.29', '1.32', '1.14', '7.06', '1.49', '2.08', '0.80', '1.08', '1.11', '0.37', '0.75', '0.71', '0.38', '0.39', '0.40', '0.74', '0.58', '0.22', '0.62', '1.14'…	0.835225	['0.89', '1.12', '1.00', '0.67', '0.85', '0.92', '0.06', '0.19', '0.28', '0.68', '0.68', '0.60', '5.19', '0.41', '0.64', '0.92', '0.64', '1.01', '8.46', '1.07', '0.41', '1.23', '0.95', '1.13', '0.59', '1.25', '0.57', '0.47', '0.44', '0.37', '0.85', '0.49', '1.48', '0.52', '0.46', '0.32', '0.72', '0.61', '1.26', '0.72', '0.86', '1.16', '9.47', '2.08', '2.36', '0.75', '0.75', '1.00', '1.02', '1.04'…	0.888906	['1.19', '0.94', '1.24', '1.08', '0.95', '0.78', '1.24', '1.79', '2.49', '1.08', '1.42', '1.30', '1.57', '0.58', '0.20', '1.49', '2.47', '6.35', '1.24', '1.34', '1.40', '2.08', '1.98', '1.70', '1.27', '0.80', '1.82', '1.04', '0.65', '0.85', '1.47', '1.17', '0.88', '0.81', '0.79', '0.80', '2.75', '1.40', '2.17', '1.18', '1.21', '1.06', '0.83', '1.00', '0.90', '1.09', '1.43', '1.31', '1.35', '0.32'…	1.01019
sp|A7ZJV1|IF1_ECO24	A7ZJV1	Translation initiation factor IF-1 OS=Escherichia coli O139:H28 (strain E24377A / ETEC) GN=infA PE=3 SV=1	infA	0.866125	['0.53', '0.53', '0.62', '0.63', '0.58', '0.64', '0.51', '0.66', '0.47', '0.56', '0.61', '0.62', '0.62', '0.56', '0.62', '0.30', '0.43', '0.38', '0.58', '0.60', '0.71', '0.83', '1.06', '0.69', '0.48', '1.05', '0.46', '0.24', '0.79', '1.74']	0.593582	['1.65', '1.63', '1.56', '1.41', '1.01', '1.48', '2.08', '2.02', '1.64', '3.00', '1.41', '1.39', '1.25', '0.72', '0.83', '1.40', '1.44', '1.35', '1.01', '1.38', '1.05', '0.95', '1.00', '0.98', '0.88', '1.20', '1.06', '1.77', '1.67', '1.66', '1.21', '0.97', '0.83', '1.01', '0.80', '0.74', '0.72', '0.89', '0.56']	1.19716	['0.60', '0.58', '0.58', '0.79', '0.95', '0.65', '0.56', '0.55', '0.36', '0.57', '0.54', '0.73', '0.76', '0.80', '0.69', '0.44', '0.54', '0.51', '0.58', '0.59', '0.52', '0.73', '0.80', '0.74', '0.65', '0.73', '0.63', '0.26', '0.50', '0.49', '0.45', '0.50', '0.50', '0.54', '0.48', '0.44', '0.67', '0.27', '0.23', '0.74', '0.76', '0.19']	0.54762	['1.09', '1.11', '1.28', '1.75', '0.98', '1.55', '2.18', '1.69', '1.56', '1.24', '1.31', '1.64', '1.24', '1.67', '1.31', '1.54', '1.16', '1.47', '1.35', '1.43', '2.10', '2.78', '1.93', '8.87', '1.42', '0.77', '1.20', '0.86', '0.68', '0.95']	1.44614
sp|B7UGX6|ISCS_ECO27	B7UGX6	Cysteine desulfurase OS=Escherichia coli O127:H6 (strain E2348/69 / EPEC) GN=iscS PE=3 SV=1	iscS	0.805541	['0.90', '0.52', '0.47', '0.40', '0.49', '0.36', '0.42', '0.46', '0.17', '0.82', '0.88', '0.83', '1.16', '0.96', '0.50', '0.73', '0.59', '0.32', '2.09', '2.83', '1.45', '0.70', '0.61', '0.50', '0.89', '1.10', '0.31', '0.78', '0.81', '1.05', '1.17', '1.07', '1.64', '0.81', '0.85', '0.76', '0.69', '0.86', '0.61', '0.55', '0.55', '0.75', '0.59', '0.63', '0.55', '0.91', '0.76', '0.91', '0.55', '0.74'…	0.706765	['0.64', '0.67', '0.63', '0.37', '0.41', '0.31', '0.99', '1.44', '1.47', '0.47', '0.47', '0.72', '0.66', '0.80', '1.12', '0.87', '1.83', '1.67', '0.66', '0.66', '0.48', '1.76', '0.45', '0.60', '0.35', '0.48', '0.69', '0.90', '1.12', '2.22', '0.46', '0.55', '0.66', '1.58', '1.54', '1.57', '1.41', '1.47', '1.19', '0.61', '0.48', '0.68', '0.33', '0.27', '0.25', '2.07', '0.95', '1.42', '1.21', '0.94'…	0.787913	['0.46', '0.49', '0.43', '0.49', '0.66', '0.69', '0.53', '0.49', '0.89', '0.36', '0.31', '0.27', '0.54', '0.36', '0.12', '0.26', '0.37', '1.72', '0.53', '0.48', '0.50', '0.81', '0.75', '1.09', '0.56', '0.54', '0.60', '0.91', '0.67', '2.10', '0.61', '0.74', '0.79', '0.28', '0.71', '0.73', '0.47', '0.48', '0.53', '1.04', '0.77', '1.02', '0.53', '0.51', '0.61', '0.78', '0.78', '0.95', '0.75', '0.93'…	0.613382	['1.38', '0.92', '0.94', '1.42', '2.08', '2.19', '1.30', '2.07', '1.37', '1.55', '1.09', '1.00', '2.09', '2.06', '1.57', '1.57', '5.20', '1.15', '1.06', '1.14', '1.17', '1.30', '0.99', '0.98', '0.88', '0.74', '1.54', '5.87', '3.87', '4.53', '2.19', '1.73', '0.41', '0.96', '0.81', '0.54', '1.38', '0.65', '0.52', '3.01', '2.81', '2.63', '3.09', '2.22', '1.31', '2.06', '1.75', '3.65', '0.62', '0.52'…	1.23272
sp|Q7A978|KATG1_ECO57	Q7A978	Catalase-peroxidase 1 OS=Escherichia coli O157:H7 GN=katG1 PE=3 SV=1	katG1	1.07029	['0.56', '0.80', '0.19', '0.86', '1.43', '0.83', '0.52', '0.56', '0.57', '0.46', '0.40', '0.45', '0.47', '0.54', '0.29', '0.81', '0.72', '0.76', '0.33', '0.94', '0.46', '0.55', '0.41', '0.21', '0.74', '0.72', '0.97', '0.61', '0.45', '0.60', '0.97', '0.68', '0.78', '1.03', '0.81', '2.07', '0.87', '0.66', '0.82', '1.29', '1.91', '1.01', '1.32', '1.27', '1.08', '0.33', '0.40', '0.41', '3.24', '2.94'…	0.733717	['1.60', '1.01', '1.71', '0.96', '0.76', '1.08', '0.96', '1.23', '0.89', '0.73', '0.70', '0.50', '0.21', '0.48', '0.51', '0.98', '0.90', '0.72', '1.72', '1.30', '1.25', '0.77', '0.73', '0.82', '1.04', '1.19', '1.55', '2.10', '1.45', '1.09', '1.24', '0.81', '1.21', '5.36', '9.28', '11.15', '1.08', '1.42', '1.07', '1.93', '1.68', '2.17', '2.33', '2.38', '2.02', '0.50', '0.58', '0.44', '0.84', '1.12…	1.29265	['1.04', '1.10', '1.02', '1.07', '1.27', '1.05', '0.89', '1.75', '0.90', '1.70', '1.10', '2.30', '0.80', '0.85', '0.75', '0.47', '0.51', '0.55', '1.18', '0.76', '0.77', '0.90', '0.86', '0.97', '1.01', '1.18', '0.74', '0.41', '0.41', '3.23', '0.43', '0.54', '0.53', '0.58', '0.44', '0.51', '0.71', '1.02', '1.56', '1.54', '1.33', '1.35', '1.04', '1.32', '1.10', '1.89', '0.67', '0.77', '0.69', '0.43'…	0.874942	['0.93', '4.77', '2.29', '4.33', '1.90', '7.55', '2.19', '2.10', '1.73', '3.79', '5.41', '2.10', '2.14', '1.79', '0.75', '3.43', '2.30', '1.52', '3.01', '2.60', '0.97', '2.38', '2.22', '3.34', '1.45', '3.81', '0.53', '3.72', '3.48', '2.81', '1.64', '2.01', '1.50', '1.55', '2.17', '1.00', '0.31', '0.16', '0.20', '1.47', '2.07', '2.48', '2.57', '2.02', '2.30', '1.29', '1.29', '1.10', '0.97', '0.70'…	1.58132
sp|B7UQA3|KDSA_ECO27	B7UQA3	2-dehydro-3-deoxyphosphooctonate aldolase OS=Escherichia coli O127:H6 (strain E2348/69 / EPEC) GN=kdsA PE=3 SV=1	kdsA	0.856351	['0.67', '0.76', '0.38', '0.98', '0.85', '0.96', '0.65', '0.83', '0.73', '0.81', '0.66', '0.55', '0.95', '0.91', '0.99', '1.06', '1.08', '1.26', '1.97', '1.49', '0.79', '1.13', '2.80', '4.88', '0.62', '0.62', '0.56', '1.07', '0.55', '0.54', '0.89', '0.77', '0.98', '0.54', '0.48', '0.89', '0.59', '0.67', '0.59', '0.91', '1.27', '1.34', '1.36', '1.24', '1.46', '0.83', '0.95', '1.16', '0.97', '0.89'…	0.928525	['1.45', '1.87', '1.75', '3.42', '3.33', '8.41', '2.59', '0.92', '6.85', '0.69', '3.17', '2.19', '0.56', '0.76', '0.50', '0.85', '1.04', '1.01', '0.58', '0.76', '0.44', '0.58', '0.56', '0.62', '1.71', '1.72', '1.93', '1.66', '2.16', '1.79', '5.43', '2.12', '0.76', '0.79', '0.46', '0.77', '3.09', '3.39', '2.30', '0.86', '0.67', '0.69', '1.66', '4.97', '1.49', '1.81', '1.30', '1.11', '0.41', '0.43'…	1.06916	['0.61', '0.57', '0.92', '0.82', '1.29', '2.03', '0.28', '0.44', '0.35', '0.27', '0.39', '0.29', '0.55', '0.52', '0.52', '0.67', '0.82', '0.84', '0.29', '0.28', '0.25', '0.23', '0.31', '0.25', '0.34', '0.26', '0.38', '0.69', '3.21', '0.99', '0.41', '0.43', '0.83', '0.84', '0.38', '0.66', '0.53', '1.35', '0.09', '0.86', '0.33', '0.95', '1.19', '0.87', '0.88', '0.69', '0.58', '0.68', '0.59', '0.61'…	0.514416	['0.34', '0.34', '0.33', '0.50', '0.32', '0.42', '1.46', '0.91', '1.04', '0.47', '1.69', '0.36', '0.91', '0.89', '1.18', '1.49', '1.27', '0.83', '0.80', '0.85', '0.85', '0.82', '0.56', '0.82', '0.92', '0.87', '0.91', '0.99', '1.03', '0.77', '0.99', '1.00', '0.86', '1.21', '1.80', '2.61', '1.27', '1.56', '0.76', '1.24', '1.02', '1.02', '1.41', '1.33', '1.22', '0.89', '1.23', '1.30', '3.17', '3.45'…	1.05307
sp|P52643|LDHD_ECOLI	P52643	D-lactate dehydrogenase OS=Escherichia coli (strain K12) GN=ldhA PE=1 SV=1	ldhA	1.27301	['2.25', '2.45', '1.64', '1.66', '1.67', '1.67', '2.26', '2.14', '2.21', '2.15', '2.30', '1.81', '2.46', '2.56', '2.44', '2.46', '2.56', '2.45', '0.24', '0.40', '1.32', '2.18', '1.83', '1.79', '1.15', '0.20', '0.16', '1.31', '0.78', '0.37', '1.03', '1.16', '1.04', '0.71', '1.33', '1.48', '1.10', '1.17', '1.04', '1.24', '1.01', '1.15', '0.72', '1.31', '0.63', '1.25', '1.21', '0.91', '1.27', '0.94'…	1.19244	['0.62', '0.71', '2.49', '1.97', '1.68', '1.52', '3.61', '3.11', '3.35', '1.22', '1.28', '1.83', '1.02', '0.90', '0.72', '1.75', '1.76', '1.50', '1.16', '1.51', '1.01', '1.17', '1.10', '1.13', '1.34', '0.84', '1.25', '1.04', '2.04', '1.71']	1.39912	['1.91', '1.81', '2.25', '0.91', '0.77', '0.82', '1.15', '1.01', '1.52', '1.28', '1.28', '1.12', '1.44', '0.60', '0.58', '1.04', '1.33', '1.10', '1.13', '1.81', '0.98', '1.43', '1.28', '1.05', '1.40', '2.49', '1.44', '0.36', '0.38', '0.42', '2.63', '1.07', '1.17']	1.11859	['3.09', '2.76', '2.03', '0.81', '0.57', '0.89', '3.38', '2.56', '3.17', '2.76', '2.93', '0.51', '0.72', '0.97', '0.44', '0.84', '0.92', '1.76', '1.62', '0.71', '0.66', '2.20', '2.63', '2.47', '1.79', '2.31', '2.25', '1.86', '1.57', '1.42', '1.57', '1.98', '1.79', '0.88', '0.91', '0.35']	1.40722
sp|P0A9M0|LON_ECOLI	P0A9M0	Lon protease OS=Escherichia coli (strain K12) GN=lon PE=1 SV=1	lon	0.881368	['0.60', '0.59', '0.64', '0.57', '0.72', '0.59', '0.66', '0.64', '0.61', '0.80', '0.90', '0.76', '0.41', '0.89', '0.45', '0.74', '0.69', '0.75', '1.86', '4.48', '2.93', '0.31', '0.55', '0.50', '0.74', '1.04', '0.54', '0.75', '0.78', '0.38', '1.06', '2.18', '0.35', '0.73', '0.82', '0.34', '1.25', '1.73', '1.04', '0.73', '0.57', '0.54', '0.68', '0.73', '1.03', '0.74', '0.74', '2.90', '0.83', '1.49'…	0.786043	['0.71', '0.55', '1.82', '0.61', '1.12', '1.07', '1.25', '1.41', '1.53', '0.91', '0.86', '0.85', '0.62', '1.15', '0.68', '0.41', '0.41', '0.39', '0.55', '1.08', '0.87', '1.47', '1.18', '1.67', '0.81', '0.61', '0.88', '1.03', '0.68', '0.57', '0.46', '0.45', '0.43', '0.76', '1.01', '0.75', '0.27', '0.28', '0.25', '0.57', '0.79', '0.81', '1.56', '1.67', '1.39', '0.74', '0.60', '4.15', '0.68', '0.71'…	0.982402	['0.34', '0.90', '0.50', '2.05', '0.56', '1.30', '0.29', '0.27', '0.29', '0.52', '3.02', '0.84', '0.59', '0.59', '0.20', '3.41', '3.36', '2.88', '2.66', '32.05', '28.72', '0.37', '0.35', '1.42', '0.43', '0.36', '0.63', '0.38', '0.69', '0.71', '0.98', '0.86', '0.89', '0.96', '0.82', '1.03', '0.56', '0.59', '0.70', '1.62', '1.59', '2.19', '0.51', '0.30', '1.54', '0.68', '0.58', '0.71', '0.38', '0.3…	0.768169	['1.20', '1.11', '0.77', '1.12', '1.10', '1.18', '0.55', '0.55', '0.52', '0.33', '1.79', '0.28', '1.18', '1.25', '1.95', '1.20', '0.94', '0.91', '0.75', '0.93', '1.51', '1.39', '0.84', '0.83', '1.18', '1.04', '0.73', '1.37', '2.61', '0.77', '1.44', '1.25', '1.77', '1.29', '1.08', '1.18', '1.10', '0.99', '0.60', '1.01', '1.02', '0.89', '0.80', '0.77', '0.79', '1.13', '1.44', '1.08', '0.41', '1.64'…	1.01727
sp|P0A9P2|DLDH_ECO57	P0A9P2	Dihydrolipoyl dehydrogenase OS=Escherichia coli O157:H7 GN=lpdA PE=3 SV=2	lpdA	1.54864	['1.67', '1.67', '1.79', '1.41', '1.86', '1.51', '2.64', '2.20', '1.56', '0.67', '1.18', '0.96', '1.71', '1.65', '1.61', '0.76', '0.93', '0.80', '1.99', '2.32', '2.46', '2.64', '2.18', '1.94', '1.68', '1.62', '1.10', '1.03', '0.80', '0.65', '1.97', '2.25', '1.08', '1.29', '1.50', '1.05', '1.64', '0.75', '1.13', '2.02', '2.02', '2.06', '2.15', '2.69', '5.70', '2.71', '2.47', '2.90', '2.03', '2.04'…	1.5265	['1.56', '1.67', '1.52', '1.72', '1.74', '1.52', '3.23', '1.80', '1.76', '0.91', '1.72', '2.48', '2.55', '2.44', '2.12', '1.66', '0.95', '1.98', '1.95', '2.02', '2.11', '1.38', '1.90', '1.64', '2.08', '2.31', '2.15', '2.73', '2.24', '2.80', '2.41', '2.47', '2.54', '1.96', '1.34', '0.84', '1.81', '1.80', '1.61', '2.61', '1.60', '1.04', '1.77', '1.59', '1.16', '0.81', '1.63', '1.69', '1.15', '1.46'…	1.66923	['1.15', '1.03', '1.10', '1.49', '1.53', '1.62', '1.24', '0.96', '1.12', '1.70', '1.99', '2.44', '1.29', '1.26', '1.19', '1.30', '1.40', '1.38', '1.02', '1.03', '0.66', '1.77', '1.51', '1.02', '0.77', '1.26', '0.40', '0.94', '1.13', '7.22', '0.94', '1.15', '9.66', '0.58', '0.70', '0.73', '1.65', '1.75', '1.50', '1.61', '1.49', '1.00', '0.93', '0.88', '1.05', '1.91', '1.93', '1.76', '0.78', '1.10'…	1.25309	['1.67', '1.85', '1.70', '1.54', '1.95', '1.20', '1.20', '1.13', '1.24', '1.35', '1.18', '1.26', '3.58', '3.53', '3.67', '3.07', '2.83', '2.93', '1.83', '1.62', '1.64', '1.70', '1.86', '1.44', '0.88', '1.40', '1.80', '0.28', '0.31', '0.43', '4.92', '4.56', '1.42', '2.96', '2.98', '0.54', '2.45', '2.38', '2.30', '2.13', '2.26', '1.77', '1.83', '1.32', '1.65', '2.28', '2.18', '2.28', '1.53', '1.25'…	1.8014
sp|B7UJ82|LPXA_ECO27	B7UJ82	Acyl-[acyl-carrier-protein]--UDP-N-acetylglucosamine O-acyltransferase OS=Escherichia coli O127:H6 (strain E2348/69 / EPEC) GN=lpxA PE=3 SV=1	lpxA	0.705999			['0.44', '0.49', '0.42']	0.448223	['0.79', '0.51', '0.76', '0.81', '1.23', '0.94']	0.811026	['0.75', '1.08', '1.12']	0.968017
sp|P0ACJ2|LRP_ECO57	P0ACJ2	Leucine-responsive regulatory protein OS=Escherichia coli O157:H7 GN=lrp PE=3 SV=2	lrp	0.889545	['0.53', '0.94', '1.78', '0.75', '0.75', '0.56', '0.59', '0.46', '0.91', '0.83', '0.32', '1.44', '0.55', '0.41', '0.47']	0.67575	['0.75', '0.69', '0.81', '0.38', '0.48', '0.59', '1.24', '1.15', '1.14', '1.05', '0.95', '0.71', '1.51', '1.65', '1.68', '1.24', '0.95', '1.63', '0.68', '0.47', '0.55', '0.85', '0.94', '0.69']	0.874008	['0.70', '0.55', '0.78', '2.78', '2.78', '1.86', '0.77', '0.62', '0.58', '0.44', '0.81', '0.33', '1.03', '0.95', '0.58', '0.46', '0.60', '1.05', '0.63', '0.79', '0.72', '0.37', '0.52', '1.06', '0.69', '3.98', '3.54', '1.01', '0.45', '0.06']	0.771224	['1.46', '1.70', '1.28', '1.38', '1.45', '1.61', '1.74', '1.37', '2.84', '1.42', '1.54', '1.42', '0.82', '1.39', '0.48']	1.37465
sp|B7UHB0|LUXS_ECO27	B7UHB0	S-ribosylhomocysteine lyase OS=Escherichia coli O127:H6 (strain E2348/69 / EPEC) GN=luxS PE=3 SV=1	luxS	1.0293	['1.19', '1.20', '1.13', '1.25', '1.11', '1.15', '0.98', '0.82', '0.80', '1.50', '1.15', '0.93', '1.06', '0.94', '0.91', '1.02', '0.90', '0.58', '0.99', '1.10', '1.20', '0.86', '0.85', '0.32', '1.91', '1.03', '0.44', '0.84', '0.80', '0.44', '3.42', '1.62', '3.35', '1.10', '0.84', '0.84', '1.47', '1.16', '1.30', '1.13', '1.20', '1.00', '1.13', '1.71', '1.24', '1.22', '0.92', '0.82']	1.04783	['1.83', '1.34', '1.10', '1.20', '1.12', '1.01', '0.58', '1.06', '0.47', '1.67', '2.11', '0.98', '0.71', '1.41', '0.77', '0.98', '1.31', '1.19', '2.34', '2.26', '1.11', '1.40', '1.46', '0.98', '2.01', '2.24', '0.66', '1.26', '1.22', '1.13', '0.30', '0.60', '0.50', '1.56', '1.53', '1.60', '1.61', '1.76', '1.81', '1.41', '1.23', '1.12', '1.21', '1.01', '0.66']	1.15811	['0.74', '0.71', '0.63', '0.92', '0.89', '0.96', '0.58', '0.86', '0.82', '1.11', '1.19', '1.99', '0.64', '0.65', '19.95', '1.61', '0.86', '0.30', '0.80', '0.88', '0.45', '1.10', '1.05', '0.55', '0.84', '1.06', '0.53', '1.07', '0.67', '0.84', '0.78', '1.27', '1.13', '0.68', '0.69', '0.75', '1.02', '0.80', '0.75', '0.77', '0.72', '0.82', '1.26', '1.47', '0.85']	0.902361	['1.32', '1.10', '0.98', '1.34', '0.92', '0.87', '1.35', '1.01', '1.53', '0.32', '0.87', '0.90', '0.67', '0.73', '0.68', '0.87', '0.71', '1.09', '0.27', '0.67', '0.88', '2.29', '1.56', '1.13', '2.27', '1.34', '0.91', '0.80', '0.56', '0.95', '1.28', '1.26', '1.23', '1.17', '0.95', '0.98', '1.09', '1.30', '1.27', '1.81', '1.14', '1.16', '1.24', '1.36', '1.42']	1.02505
sp|P0A8N4|SYK1_ECOL6	P0A8N4	Lysine--tRNA ligase OS=Escherichia coli O6:H1 (strain CFT073 / ATCC 700928 / UPEC) GN=lysS PE=3 SV=2	lysS	0.839816	['0.63', '0.77', '0.29', '0.72', '0.88', '0.77', '0.52', '0.71', '1.01', '0.82', '0.73', '0.34', '0.83', '0.82', '0.90', '0.51', '0.67', '0.68', '0.56', '0.67', '0.55', '1.60', '1.35', '0.75', '0.25', '0.70', '2.19', '0.55', '0.50', '0.45', '1.03', '0.80', '0.85', '0.68', '0.63', '1.10', '1.08', '1.03', '0.91', '0.40', '0.53', '1.16', '1.15', '1.08', '1.11', '2.14', '0.74', '0.68', '1.08', '1.25'…	0.832168	['0.35', '0.75', '0.63', '0.81', '1.00', '0.57', '0.50', '0.34', '0.37', '0.99', '0.81', '1.07', '0.71', '0.70', '1.01', '0.67', '0.62', '0.47', '1.45', '1.16', '1.32', '0.64', '0.69', '0.92', '1.28', '0.49', '1.25', '0.29', '0.29', '0.72', '0.80', '0.81', '0.79', '0.88', '1.19', '0.89', '0.68', '1.65', '0.62', '0.86', '1.60', '1.33', '1.07', '0.63', '1.85', '1.11', '1.12', '1.19', '0.12', '2.21'…	0.862789	['0.31', '0.64', '0.37', '0.32', '2.30', '0.28', '1.44', '1.35', '2.23', '1.33', '1.08', '0.53', '0.48', '0.76', '0.76', '0.83', '0.54', '1.21', '0.63', '0.80', '0.75', '0.46', '0.52', '0.66', '0.40', '0.84', '1.14', '0.61', '0.82', '0.40', '0.68', '0.71', '0.63', '1.20', '1.12', '1.69', '0.90', '1.02', '0.69', '0.64', '0.79', '0.97', '0.87', '0.66', '0.76', '0.82', '0.79', '0.85', '0.33', '0.23'…	0.673625	['1.59', '1.35', '1.55', '1.21', '1.47', '1.03', '3.49', '1.36', '1.13', '1.30', '1.14', '1.00', '1.48', '1.43', '3.10', '0.82', '0.87', '1.91', '0.88', '0.80', '1.23', '0.77', '0.82', '0.36', '1.00', '0.96', '1.03', '1.58', '1.44', '1.48', '1.29', '0.59', '0.89', '1.24', '1.14', '0.67', '1.28', '1.11', '1.26', '1.55', '1.47', '0.86', '0.93', '1.81', '1.32', '2.23', '1.64', '1.60', '1.76', '5.28'…	1.02849
sp|Q8FAT5|SYK2_ECOL6	Q8FAT5	Lysine--tRNA ligase, heat inducible OS=Escherichia coli O6:H1 (strain CFT073 / ATCC 700928 / UPEC) GN=lysU PE=3 SV=3	lysU	1.01435	['1.07', '0.97', '1.34', '0.82', '0.66', '0.33', '0.83', '0.82', '0.90', '0.51', '0.67', '0.68', '1.02', '0.82', '0.57', '0.73', '1.05', '0.72', '1.01', '1.09', '1.17', '1.50', '0.75', '0.77', '1.23', '0.87', '0.65', '1.78', '1.89', '1.35', '1.20', '1.13', '1.36', '0.86', '0.63', '1.23', '0.44', '0.36', '4.71', '1.34', '1.19', '0.94', '0.61', '0.39', '0.43', '1.15', '1.08', '1.11', '2.14', '0.74'…	0.946195	['1.24', '1.24', '1.22', '0.99', '0.81', '1.07', '0.71', '0.70', '1.01', '0.80', '0.73', '0.66', '0.69', '1.24', '0.68', '1.59', '1.72', '1.37', '0.56', '0.47', '1.82', '1.33', '1.03', '1.19', '1.00', '1.41', '1.47', '1.04', '0.72', '0.94', '0.84', '0.93', '0.33', '0.36', '2.98', '2.70', '0.68', '1.65', '0.62', '0.86', '1.60', '1.33', '1.07', '0.63', '1.85', '1.11', '1.12', '1.19', '1.11', '0.77'…	1.16038	['1.28', '1.60', '1.65', '1.55', '1.69', '0.70', '1.33', '1.08', '0.53', '0.48', '0.76', '0.76', '0.60', '0.65', '0.73', '1.02', '0.15', '0.77', '0.92', '0.55', '0.18', '1.09', '1.09', '1.19', '1.10', '0.59', '0.72', '1.04', '2.91', '0.96', '0.93', '1.06', '0.91', '0.88', '0.44', '1.09', '1.56', '1.52', '2.14', '0.75', '0.67', '0.25', '0.90', '1.02', '0.69', '0.64', '0.79', '0.97', '0.87', '0.66'…	0.802417	['1.61', '1.66', '1.67', '1.51', '1.31', '1.54', '1.30', '1.14', '1.00', '1.48', '1.43', '3.10', '1.66', '1.51', '1.49', '1.04', '1.70', '0.69', '1.46', '1.70', '1.23', '1.48', '1.44', '1.49', '2.55', '2.11', '0.74', '1.12', '0.94', '1.01', '1.07', '1.05', '1.04', '0.45', '0.38', '0.44', '1.77', '1.78', '3.50', '1.53', '2.79', '2.98', '0.93', '1.81', '1.32', '2.23', '1.64', '1.60', '1.76', '5.28'…	1.20164
sp|P00946|MANA_ECOLI	P00946	Mannose-6-phosphate isomerase OS=Escherichia coli (strain K12) GN=manA PE=1 SV=1	manA	0.802973	['0.66', '0.50', '0.63', '0.56', '0.63', '1.57', '0.61', '0.61', '0.86', '0.61', '3.28', '1.39', '0.48', '0.45', '0.51', '0.62', '0.63', '0.69', '0.59', '0.56', '0.48', '0.35', '0.41', '0.49', '0.51', '0.44', '0.39', '0.45', '0.38', '0.52', '0.70', '0.42', '0.53', '0.45', '0.49', '0.46']	0.584939	['0.82', '0.82', '0.77', '0.41', '0.48', '0.43', '2.48', '0.61', '0.90', '0.73', '0.50', '0.58', '0.82', '0.66', '1.00', '1.28', '1.10', '1.04', '0.52', '0.60', '0.68', '2.45', '2.01', '1.05', '0.55', '0.69', '0.83', '4.17', '6.06', '4.86', '4.67', '5.23', '4.59', '3.97', '1.57', '1.97', '0.52', '0.94', '0.66', '0.62', '0.80', '0.43', '0.55', '0.86', '0.72']	1.05984	['0.96', '0.70', '0.58', '0.86', '0.86', '1.04', '1.16', '1.01', '0.37', '0.53', '0.59', '0.53', '0.72', '0.78', '1.09', '0.64', '0.69', '0.58', '0.59', '0.63', '0.74', '0.31', '0.32', '0.24', '0.25', '0.23', '0.23', '1.14', '1.11', '0.55', '1.17', '1.47', '1.65', '0.40', '0.48', '0.42']	0.627278	['1.37', '0.82', '2.51', '0.35', '0.81', '0.69', '0.82', '0.58', '0.54', '1.72', '1.71', '1.50', '1.40', '1.25', '1.36', '1.08', '0.84', '0.90', '2.29', '2.28', '2.21', '1.14', '1.26', '1.21', '0.91', '0.85', '0.88', '1.78', '0.70', '0.99', '1.10', '1.42', '1.30', '1.11', '0.75', '0.80', '0.73', '1.26', '1.02', '0.87', '0.85', '0.84']	1.06903
sp|P69798|PTNAB_ECOL6	P69798	PTS system mannose-specific EIIAB component OS=Escherichia coli O6:H1 (strain CFT073 / ATCC 700928 / UPEC) GN=manX PE=3 SV=2	manX	0.757645	['0.03', '0.06', '0.08', '0.23', '0.26', '0.27', '0.43', '0.77', '0.44', '0.32', '0.71', '0.51', '0.98', '0.49', '1.12', '0.40', '0.27', '0.35', '0.48', '0.87', '0.79', '0.84', '1.94', '1.44', '1.58', '0.95', '4.08', '0.90', '0.67', '0.21', '0.49', '0.31', '0.39', '0.46', '0.38', '0.56', '1.08', '1.07', '1.28']	0.510898	['1.24', '1.26', '4.35', '0.47', '0.76', '0.40', '2.28', '2.29', '2.33', '2.10', '1.82', '1.68', '0.37', '0.29', '0.52', '6.42', '4.98', '6.11', '5.36', '3.65', '2.14', '0.72', '0.76', '0.68', '0.42', '0.65', '0.52', '0.46', '0.23', '1.05', '0.66', '0.35', '0.68', '0.61', '0.81', '0.63', '0.86', '0.85', '0.48', '0.66', '0.53', '0.60', '0.59', '0.62', '0.67', '1.23', '0.39', '0.37', '0.66', '0.66'…	0.921419	['0.41', '0.34', '0.26', '0.29', '0.37', '0.36', '0.46', '0.45', '0.58', '0.69', '0.54', '0.67', '0.50', '0.60', '0.53', '0.94', '0.79', '0.37', '1.04', '1.15', '1.25', '0.31', '1.49', '0.71', '0.60', '1.11', '0.52', '2.60', '0.59', '0.34', '0.39', '0.51', '1.15', '0.46', '0.52', '0.51', '1.32', '0.81', '0.72', '0.68', '0.61', '1.04', '0.36', '0.30', '0.67', '1.14', '1.06', '0.99', '1.30', '1.83'…	0.655452	['1.48', '2.29', '0.95', '0.39', '0.47', '0.54', '0.49', '0.50', '0.60', '0.62', '0.30', '1.23', '0.83', '1.00', '1.30', '1.44', '1.46', '1.43', '0.79', '1.14', '0.78', '1.34', '0.54', '0.53', '0.95', '1.15', '1.21', '1.65', '1.02', '0.76', '1.31', '0.76', '0.90', '3.61', '4.21', '9.08', '1.45', '1.76', '1.34', '1.75', '0.65', '2.10']	1.0679
sp|P0AE20|AMPM_ECO57	P0AE20	Methionine aminopeptidase OS=Escherichia coli O157:H7 GN=map PE=3 SV=1	map	0.855845	['1.28', '0.97', '0.81', '0.70', '0.69', '0.78', '1.01', '0.86', '0.89', '2.12', '4.19', '1.28', '0.57', '1.06', '0.52', '0.80', '0.68', '0.47', '0.30', '0.23', '0.39', '0.24', '0.48', '0.58']	0.728236	['1.12', '1.21', '2.20', '1.14', '1.58', '1.35', '2.02', '1.25', '1.54', '0.57', '0.57', '0.90', '1.45', '0.64', '2.74', '0.93', '7.94', '0.55', '0.30', '0.54', '0.29', '0.58', '0.88', '0.26', '1.69', '1.22', '0.92', '1.63', '2.58', '2.09', '0.82', '0.92', '0.87', '2.29', '2.34', '1.86', '1.28', '1.36', '1.21']	1.13082	['0.20', '0.29', '3.58', '0.69', '0.75', '0.58', '0.85', '0.60', '0.66', '0.54', '0.67', '0.60', '1.19', '1.48', '1.17']	0.731108	['0.19', '1.36', '0.87', '1.37', '1.63', '1.67', '0.46', '1.03', '1.23', '0.79', '0.40', '0.94', '0.67', '1.16', '1.26', '4.77', '0.59', '0.59', '0.63', '0.80', '0.73']	0.891114
sp|B7UJW8|MDH_ECO27	B7UJW8	Malate dehydrogenase OS=Escherichia coli O127:H6 (strain E2348/69 / EPEC) GN=mdh PE=3 SV=1	mdh	1.02609	['2.14', '2.13', '2.11', '1.41', '1.36', '1.36', '2.01', '2.01', '1.91', '2.03', '1.97', '1.97', '1.61', '2.13', '1.84', '2.20', '2.65', '2.22', '0.92', '1.29', '1.30', '2.04', '2.06', '1.96', '2.17', '2.25', '1.96', '1.53', '1.48', '1.30', '0.56', '0.56', '0.52', '1.80', '2.38', '1.83', '1.96', '1.94', '1.78', '0.89', '1.59', '3.07', '2.41', '2.29', '2.19', '1.58', '2.59', '2.26', '5.60', '5.92'…	1.60561	['3.93', '3.96', '3.88', '2.33', '2.36', '2.41', '2.41', '2.52', '2.34', '1.85', '2.39', '2.38', '1.48', '1.97', '1.59', '1.49', '0.98', '1.15', '2.31', '2.62', '2.52', '1.92', '2.19', '2.04', '1.16', '1.04', '1.01', '0.80', '0.73', '0.72', '1.80', '1.71', '1.82', '0.42', '1.10', '0.57', '1.88', '2.07', '2.07', '1.66', '1.22', '1.12', '1.75', '1.56', '1.84', '0.62', '0.77', '0.75', '1.44', '1.42'…	1.47836	['1.34', '0.91', '0.79', '0.80', '0.70', '0.70', '0.30', '0.30', '0.32', '0.33', '0.30', '0.39', '0.36', '0.34', '0.56', '0.58', '0.44', '0.50', '0.51', '0.51', '0.68', '0.58', '0.44', '0.56', '0.61', '0.55', '0.47', '0.40', '0.59', '0.50', '0.45', '0.60', '0.64', '0.27', '0.25', '0.16', '0.26', '0.24', '0.24', '0.42', '2.49', '0.44', '0.31', '0.18', '0.24', '0.27', '0.24', '0.26', '0.40', '0.29'…	0.466151	['5.53', '3.95', '1.27', '28.75', '2.55', '2.77', '0.96', '1.01', '0.93', '0.98', '0.90', '0.82', '1.08', '0.99', '0.88', '0.44', '0.40', '0.89', '0.75', '0.38', '0.36', '0.83', '0.79', '0.71', '0.94', '0.84', '0.67', '0.82', '1.14', '1.38', '1.09', '2.58', '2.73', '0.71', '0.76', '0.68', '0.46', '0.53', '0.48', '0.66', '0.42', '0.52', '1.18', '1.38', '1.41', '0.73', '0.66', '0.87', '0.86', '0.58…	1.00184
sp|P0ABU1|MENB_ECOL6	P0ABU1	1,4-Dihydroxy-2-naphthoyl-CoA synthase OS=Escherichia coli O6:H1 (strain CFT073 / ATCC 700928 / UPEC) GN=menB PE=3 SV=1	menB	0.86637	['0.74', '0.95', '1.16', '0.37', '0.43', '0.56', '0.46', '0.65', '0.47', '0.87', '1.16', '1.58', '0.76', '0.83', '1.13', '0.95', '0.60', '0.64']	0.739804	['0.89', '0.87', '1.05', '1.72', '0.85', '0.39', '1.73', '1.53', '1.18', '1.03', '1.53', '1.87', '0.89', '1.50', '0.90', '0.98', '0.84', '1.08', '12.59', '5.08', '9.11', '0.54', '0.84', '0.75', '0.68', '0.55', '1.59', '0.70', '0.88', '0.94']	1.21019	['0.70', '0.75', '0.79', '0.57', '0.80', '0.65', '1.00', '1.12', '0.78', '0.82', '0.33', '0.41', '0.70', '0.81', '0.59', '0.21', '0.29', '0.19', '0.86', '1.09', '0.81', '0.43', '0.11', '0.18', '0.53', '0.24', '0.24']	0.50346	['1.23', '0.59', '0.59', '1.24', '1.14', '0.81', '0.89', '1.28', '1.40', '1.49', '1.91', '2.81', '2.62', '1.03', '1.09', '1.40', '1.60', '1.13', '2.09', '3.85', '2.41', '0.76', '1.80', '2.55', '0.62', '0.99', '0.86', '1.43', '1.55', '0.50', '1.61', '2.18', '0.97', '0.98', '1.08', '1.20', '0.74', '1.09', '0.94']	1.2499
sp|A7ZNT3|SYM_ECO24	A7ZNT3	Methionine--tRNA ligase OS=Escherichia coli O139:H28 (strain E24377A / ETEC) GN=metG PE=3 SV=1	metG	0.816645	['0.50', '0.62', '0.71', '1.04', '0.53', '0.92', '0.67', '9.94', '2.91', '1.03', '0.68', '0.77', '0.31', '0.40', '0.25', '0.91', '0.88', '0.40', '0.73', '0.75', '0.68', '0.51', '0.69', '0.81', '0.63', '0.79', '0.59', '0.88', '1.10', '0.59', '0.86', '0.83', '0.69', '1.18', '2.04', '0.66', '0.15', '0.19', '0.22', '0.78', '0.81', '0.88', '0.63', '0.64', '0.66', '0.47', '0.45', '0.60', '0.77', '1.01'…	0.710638	['4.39', '0.66', '3.86', '0.75', '0.82', '0.79', '0.89', '1.28', '0.46', '0.80', '0.68', '2.24', '1.12', '1.05', '1.08', '2.12', '3.04', '2.57', '0.52', '0.56', '0.63', '0.67', '1.32', '0.41', '1.26', '1.69', '2.14', '0.93', '0.74', '1.37', '0.25', '0.52', '0.62', '0.99', '0.77', '0.78', '0.87', '0.88', '0.79', '0.97', '0.44', '0.68', '1.31', '0.71', '1.07', '0.57', '0.47', '0.49', '0.59', '0.79'…	0.873107	['0.77', '0.66', '2.44', '0.71', '0.71', '0.80', '0.97', '1.13', '1.24', '0.43', '0.29', '0.47', '0.49', '0.47', '1.97', '0.53', '0.57', '0.76', '0.18', '0.17', '0.47', '0.89', '0.79', '0.30', '0.52', '0.77', '0.50', '0.76', '4.53', '0.38', '2.21', '1.75', '2.25', '0.94', '0.64', '0.82', '1.27', '1.26', '1.68', '1.58', '3.64', '1.48', '0.68', '1.90', '0.56', '0.51', '0.49', '0.21', '0.72', '0.79'…	0.724351	['13.93', '2.57', '7.92', '0.85', '0.84', '0.83', '1.71', '3.02', '1.78', '0.88', '1.13', '0.89', '0.38', '0.60', '0.31', '0.84', '0.67', '0.86', '1.38', '1.53', '1.45', '0.85', '1.23', '2.02', '1.36', '1.17', '1.24', '0.83', '1.12', '0.51', '1.26', '0.57', '2.63', '1.00', '0.98', '0.83', '0.82', '2.56', '1.00', '0.77', '0.83', '0.75', '0.67', '0.49', '0.66', '1.56', '3.59', '5.08', '0.96', '0.92…	0.98962
sp|A7ZKS3|MNMA_ECO24	A7ZKS3	tRNA-specific 2-thiouridylase MnmA OS=Escherichia coli O139:H28 (strain E24377A / ETEC) GN=mnmA PE=3 SV=1	mnmA	0.892715	['0.91', '0.56', '0.19', '2.95', '1.64', '2.49', '0.81', '0.76', '1.15']	0.978871	['0.91', '0.46', '0.53', '0.40', '0.10', '0.45', '1.20', '0.91', '2.19', '1.60', '1.10', '1.00', '1.09', '0.42', '0.30', '1.05', '0.76', '1.02', '0.12', '0.47', '1.56', '1.50', '1.40', '1.30']	0.727773	['0.50', '1.56', '0.81', '0.71', '0.19', '1.61', '1.18', '0.53', '1.10']	0.770159	['1.14', '1.23', '1.80', '1.37', '0.62', '0.76', '0.80', '1.14', '1.02', '1.63', '1.49', '1.56']	1.15758
sp|B7ULY0|MOAC_ECO27	B7ULY0	Molybdenum cofactor biosynthesis protein C OS=Escherichia coli O127:H6 (strain E2348/69 / EPEC) GN=moaC PE=3 SV=1	moaC	0.957717	['2.51', '2.49', '1.04', '0.48', '0.59', '0.72']	1.04585	['0.77', '0.51', '0.49', '0.64', '0.82', '1.20', '0.84', '1.17', '0.50', '0.79', '0.90', '0.91', '5.89', '5.02', '1.42', '1.68', '0.64', '0.56', '0.50', '0.71', '0.62']	0.929783	['1.13', '3.20', '1.22', '0.90', '0.90', '0.69', '0.95', '0.85', '0.77', '0.58', '0.63', '0.59', '0.85', '0.77', '1.16', '0.77', '0.53', '0.58', '0.51', '0.55', '0.93', '0.92', '0.63', '0.57', '1.15', '0.76', '2.42']	0.846422	['1.71', '1.55', '0.98', '1.85', '1.22', '0.80', '1.14', '1.02', '0.85', '0.95', '0.85', '0.34']	1.02214
sp|P12281|MOEA_ECOLI	P12281	Molybdopterin molybdenumtransferase OS=Escherichia coli (strain K12) GN=moeA PE=1 SV=1	moeA	0.89757	['1.87', '0.51', '1.42', '0.21', '0.47', '0.49', '1.55', '1.04', '2.52', '0.46', '0.29', '0.47', '0.88', '0.75', '0.61', '0.51', '0.70', '0.75', '0.65', '0.64', '0.64', '0.47', '0.52', '0.75', '0.65', '0.42', '0.89']	0.671683	['0.71', '0.87', '0.67', '1.24', '0.81', '0.68', '1.79', '0.90', '1.93', '0.65', '0.84', '0.78', '0.60', '1.11', '0.70', '0.52', '0.99', '0.40', '1.47', '0.81', '1.22', '1.14', '0.99', '1.16', '0.78', '0.89', '0.90', '1.15', '0.84', '0.81', '12.72', '12.86', '15.51']	1.14339	['1.39', '2.20', '3.22', '0.79', '0.52', '0.31', '0.73', '0.41', '0.51', '0.44', '0.39', '0.34', '1.26', '1.12', '5.16', '0.91', '0.63', '0.63', '0.76', '1.84', '0.83', '0.34', '1.27', '0.92', '0.24', '0.45', '0.73', '0.28', '0.19', '0.80', '0.31', '0.28', '1.01', '0.39', '0.53', '0.42']	0.661983	['0.64', '0.63', '0.70', '1.26', '1.61', '1.35', '1.46', '1.36', '1.42', '1.39', '0.93', '1.57', '1.15', '1.48', '1.53', '0.79', '1.46', '0.79', '2.80', '2.20', '2.77', '1.45', '0.98', '1.35', '1.87', '1.04', '1.14', '0.85', '0.94', '1.00', '0.94', '1.05', '1.21', '1.63', '2.43', '2.30']	1.27664
sp|B7USF8|MSRB_ECO27	B7USF8	Peptide methionine sulfoxide reductase MsrB OS=Escherichia coli O127:H6 (strain E2348/69 / EPEC) GN=msrB PE=3 SV=1	msrB	1.35879	['1.44', '1.69', '3.28', '1.98', '3.33', '1.29', '0.94', '1.17', '1.59', '1.06', '1.28', '1.31', '2.16', '2.54', '1.93', '0.58', '0.57', '1.99']	1.50019	['1.92', '2.25', '1.95', '0.49', '0.42', '1.78', '2.27', '0.27', '3.64', '3.18', '5.60', '3.38', '1.23', '1.64', '1.30', '0.98', '1.25', '0.85', '2.12', '1.31', '1.62', '3.64', '0.91', '3.57', '1.87', '2.20', '5.26', '2.65', '2.47', '1.62']	1.72855	['1.33', '1.00', '0.80', '0.52', '1.53', '1.02', '0.60', '2.30', '2.00', '2.05', '1.52', '2.69', '1.28', '1.15', '1.14', '0.39', '0.53', '1.39', '0.35', '0.12', '0.66', '1.08', '1.02', '1.65', '1.71', '1.98', '1.47', '1.05', '1.01', '1.12']	1.03609	['1.24', '1.00', '1.84', '0.67', '1.52', '0.73', '1.35', '1.37', '1.54', '1.25', '1.43', '1.28', '1.54', '1.41', '0.80', '1.51', '1.67', '1.53', '2.03', '2.34', '0.42']	1.26878
sp|P76270|MSRC_ECOLI	P76270	Free methionine-R-sulfoxide reductase OS=Escherichia coli (strain K12) GN=msrC PE=1 SV=2	msrC	1.02389	['0.76', '0.49', '0.77']	0.657405	['0.96', '1.47', '0.67', '1.29', '2.88', '1.94', '1.04', '3.20', '2.54']	1.57031	['0.94', '1.20', '0.57', '0.58', '0.57', '0.99', '1.18', '1.03', '1.44']	0.893374	['1.04', '1.25', '1.09', '1.01', '0.92', '1.15', '1.47', '1.59', '1.36']	1.19171
sp|P11349|NARH_ECOLI	P11349	Respiratory nitrate reductase 1 beta chain OS=Escherichia coli (strain K12) GN=narH PE=1 SV=3	narH	1.25943			['1.20', '0.08', '1.11', '12.88', '0.75', '27.20', '0.97', '1.46', '1.80', '1.25', '1.22', '1.30', '1.11', '0.01', '0.07', '2.43', '0.79', '1.41', '1.79', '2.35', '1.74', '1.50', '2.00', '1.21', '1.73', '1.37', '1.81', '0.75', '0.31', '0.69', '1.13', '1.32', '1.15', '1.89', '2.02', '1.83', '0.65', '0.73', '0.64', '0.71', '2.84', '1.12', '2.21', '1.39', '1.33', '0.57', '1.30', '0.74']	1.10069	['3.34', '2.36', '0.71', '2.46', '1.08', '1.02', '1.69', '1.33', '1.36', '4.45', '1.13', '3.31', '0.27', '0.25', '0.38', '0.35', '0.57', '0.57', '0.67', '0.66', '0.63', '1.45', '1.22', '1.83', '1.19', '0.91', '0.64', '0.64', '0.66', '1.31']	0.992406	['2.67', '1.19', '1.15', '4.75', '4.18', '2.90', '1.00', '1.10', '0.64', '1.45', '1.64', '1.10', '2.44', '3.50', '2.02', '2.84', '1.98', '1.53', '1.65', '2.49', '1.38', '2.61', '1.10', '1.77', '1.01', '1.76', '1.90', '3.04', '3.07', '2.07', '1.47', '1.03', '1.11', '1.35', '1.46', '7.64']	1.8288
sp|P0AF30|NARL_ECO57	P0AF30	Nitrate/nitrite response regulator protein NarL OS=Escherichia coli O157:H7 GN=narL PE=3 SV=1	narL	1.07137	['0.49', '0.64', '0.52', '0.47', '0.76', '0.75', '1.52', '0.99', '0.42', '1.42', '1.67', '1.89', '2.19', '3.49', '2.33', '1.20', '0.73', '0.46']	0.995277	['1.30', '1.50', '1.10', '0.79', '1.06', '0.92', '0.75', '1.05', '2.72', '0.44', '0.28', '0.26', '1.79', '1.65', '2.08', '1.24', '1.54', '2.02', '0.27', '1.50', '0.60', '1.43', '1.55', '1.37', '1.34', '1.42', '1.04']	1.05166	['0.93', '0.85', '1.71', '1.26', '1.21', '1.30', '1.79', '3.09', '2.32', '0.35', '0.84', '0.59', '1.15', '1.02', '0.98', '0.40', '1.33', '0.80', '1.39', '0.91', '1.03', '1.17', '1.09', '0.80', '0.52', '1.02', '1.77', '1.27', '1.29', '1.43', '2.87', '1.85', '0.11']	1.05041	['1.21', '1.60', '1.26', '1.01', '1.10', '0.94', '2.06', '1.25', '1.11', '2.09', '0.84', '0.91', '1.61', '1.62', '1.56', '0.37', '0.63', '1.00', '1.36', '0.43', '1.41', '1.24', '1.15', '1.54', '2.74', '1.91', '1.23']	1.19832
sp|A7ZPW1|NDK_ECO24	A7ZPW1	Nucleoside diphosphate kinase OS=Escherichia coli O139:H28 (strain E24377A / ETEC) GN=ndk PE=3 SV=1	ndk	0.97857	['1.34', '0.62', '13.03', '0.87', '0.95', '1.30', '0.69', '0.72', '0.64', '0.76', '0.82', '0.92', '0.81', '0.80', '1.04', '1.01', '1.15', '1.11', '0.80', '0.94', '0.94', '1.07', '1.16', '0.76', '0.75', '1.01', '0.59']	0.978567	['0.99', '1.18', '0.67', '1.11', '0.84', '0.74', '1.11', '1.11', '0.94', '0.30', '0.30', '0.38', '1.18', '1.09', '1.13', '0.24', '0.13', '0.93', '1.41', '0.82', '1.06', '11.59', '0.71', '2.31', '1.33', '1.33', '1.41', '0.99', '1.04', '1.27', '1.89', '1.44', '1.66', '1.13', '2.83', '1.15', '0.86', '0.95', '0.56', '0.60', '0.58', '0.98', '0.52', '0.40', '1.06']	0.929999	['0.45', '0.35', '0.50', '0.51', '0.52', '0.44', '1.48', '1.03', '0.93', '0.52', '0.53', '7.68', '0.21', '0.44', '0.74', '0.43', '0.50', '0.53', '1.25', '1.28', '1.13', '1.16', '0.47', '0.71', '0.58', '0.58', '0.70', '0.83', '0.88', '1.00', '0.83', '0.80', '0.70', '0.56', '0.80', '0.61', '0.76', '0.72', '0.70', '0.70', '0.53', '0.25']	0.683478	['1.86', '1.62', '1.62', '2.13', '4.03', '2.33', '3.35', '3.07', '3.41', '3.30', '2.52', '4.29', '1.26', '0.38', '1.22', '1.02', '1.09', '1.00', '0.90', '1.12', '0.90', '1.25', '1.18', '1.27', '1.01', '0.89', '1.05', '0.86', '1.38', '1.42', '1.44', '0.98', '1.01', '1.54', '0.63', '3.87']	1.47425
sp|A7ZSU3|NFUA_ECO24	A7ZSU3	Fe/S biogenesis protein NfuA OS=Escherichia coli O139:H28 (strain E24377A / ETEC) GN=nfuA PE=3 SV=1	nfuA	0.938472	['1.50', '1.61', '1.10', '1.34', '7.00', '0.93', '0.77', '0.48', '0.77', '0.49', '0.57', '0.40']	0.97562	['1.14', '1.33', '0.84', '0.94', '0.82', '1.73', '0.74', '2.42', '1.17', '0.72', '0.91', '0.92', '1.69', '1.58', '1.26', '0.41', '0.65', '0.89']	1.02961	['0.55', '0.54', '0.52', '0.66', '0.86', '0.81', '0.58', '0.95', '0.39', '0.62', '0.47', '0.56', '0.60', '0.89', '0.86', '0.66', '0.81', '0.73']	0.65177	['1.39', '1.44', '1.56', '1.84', '0.74', '0.85', '1.82', '1.16', '0.90', '1.48', '1.32', '1.44', '1.17', '1.54', '1.76', '0.70', '0.81', '1.82', '0.97', '1.00', '0.58']	1.18478
sp|P08201|NIRB_ECOLI	P08201	Nitrite reductase [NAD(P)H] large subunit OS=Escherichia coli (strain K12) GN=nirB PE=3 SV=4	nirB	0.981659	['0.97', '0.57', '0.57', '0.97', '0.72', '0.76', '2.20', '0.66', '0.67', '2.22', '0.92', '0.88', '0.99', '0.18', '9.59']	0.954827	['0.50', '0.29', '0.94', '0.55', '0.34', '0.52', '0.60', '2.62', '1.35', '0.53', '1.21', '0.81', '1.31', '5.88', '7.11', '0.40', '2.63', '1.72', '0.90', '1.08', '0.37']	0.968768	['0.69', '1.03', '1.26', '2.17', '2.95', '0.34', '1.54', '1.22', '1.06', '0.45', '0.63', '0.76', '0.51', '0.52', '0.35']	0.842728	['0.91', '0.90', '0.79', '1.49', '2.61', '1.59', '0.93', '1.04', '0.80', '1.81', '1.55', '1.55', '1.56', '0.84', '0.82', '0.84', '0.97', '1.99']	1.19127
sp|P31979|NUOF_ECOLI	P31979	NADH-quinone oxidoreductase subunit F OS=Escherichia coli (strain K12) GN=nuoF PE=1 SV=3	nuoF	0.851154	['0.37', '0.27', '0.35', '0.77', '0.63', '0.81', '0.93', '0.92', '0.50', '0.86', '0.70', '0.82', '0.71', '1.41', '1.78', '0.62', '0.74', '0.86', '0.48', '0.66', '0.59', '0.76', '0.54', '0.53', '0.82', '0.74', '0.46', '0.77', '0.86', '1.96']	0.706634	['0.80', '1.40', '0.92', '2.57', '1.76', '2.00', '0.94', '0.74', '0.72', '0.06', '0.09', '0.07', '0.48', '1.46', '1.55', '1.48', '1.43', '1.41', '0.92', '1.40', '1.69', '1.26', '1.02', '1.04', '0.94', '0.93', '0.94', '0.81', '0.79', '0.79', '0.31', '0.42', '0.39', '0.93', '0.87', '0.87', '0.58', '0.78', '0.82', '1.10', '1.28', '1.39', '1.52', '1.72', '1.87', '2.14', '3.43', '1.46', '1.27', '1.20'…	0.909824	['1.00', '0.48', '0.62', '0.36', '0.39', '0.47', '0.48', '0.37', '0.78', '0.99', '0.86', '0.83', '1.17', '1.15', '1.63', '1.90', '0.70', '0.41', '0.87', '1.19', '1.08', '0.64', '0.69', '0.62', '0.54', '0.62', '0.62', '1.61', '1.29', '1.15', '0.55', '0.41', '0.31', '0.43', '1.02', '0.31', '0.67', '0.60', '0.65', '0.66', '1.11', '0.65', '0.92', '0.88', '1.15', '1.14', '1.06', '0.31', '1.02', '0.55'…	0.727801	['0.88', '1.28', '1.54', '1.00', '1.08', '0.64', '0.84', '0.92', '0.78', '0.80', '1.12', '0.69', '1.94', '2.11', '2.03', '1.28', '2.01', '2.12', '1.31', '1.39', '1.17', '1.15', '1.09', '1.25', '0.51', '1.76', '0.89', '1.02', '1.26', '1.06', '0.88', '0.96', '0.97', '1.09', '0.10', '0.04', '1.80', '0.90', '0.87', '1.33', '1.53', '1.52', '1.57', '1.28', '2.26', '2.56', '0.55', '1.74', '2.27', '2.25'…	1.12168
sp|P0AFD8|NUOI_ECO57	P0AFD8	NADH-quinone oxidoreductase subunit I OS=Escherichia coli O157:H7 GN=nuoI PE=3 SV=1	nuoI	1.21833			['0.91', '0.85', '0.88', '1.55', '1.05', '1.30', '1.36', '1.31', '2.22', '0.81', '0.70', '1.59', '0.65', '0.84', '0.84', '1.43', '1.30', '0.87']	1.07774	['1.29', '0.89', '0.81', '0.78', '1.72', '0.94', '1.82', '2.34', '0.28']	1.03721	['1.06', '0.74', '2.34', '0.67', '0.92', '4.42', '1.04', '1.03', '0.59', '1.50', '1.45', '21.39', '1.69', '2.02', '1.68', '2.56', '3.54', '0.76']	1.61778
sp|B7UJN9|NUSB_ECO27	B7UJN9	N utilization substance protein B homolog OS=Escherichia coli O127:H6 (strain E2348/69 / EPEC) GN=nusB PE=3 SV=1	nusB	0.809377	['0.69', '0.68', '0.78', '3.31', '1.17', '6.68', '1.20', '1.36', '0.30', '0.45', '0.57', '0.50', '0.43', '0.44', '0.42', '0.64', '0.91', '5.44']	0.896733	['0.98', '0.88', '0.77', '1.62', '1.48', '1.10', '0.75', '0.62', '1.08', '0.71', '0.68', '0.52', '0.36', '0.34', '0.40', '1.50', '1.65', '1.35', '0.47', '0.41', '0.71']	0.775584	['1.21', '1.45', '0.97', '0.44', '0.43', '0.50', '0.55', '0.47', '0.95', '0.69', '0.88', '2.24', '0.84', '0.81', '1.08', '0.19', '0.26', '0.26', '3.14', '0.59', '0.40', '1.41', '0.95', '0.88']	0.722797	['0.24', '0.41', '3.59', '0.17', '0.05', '0.26', '0.84', '1.08', '1.51', '0.61', '0.38', '0.63', '1.45', '15.96', '20.77', '2.29', '1.04', '0.30']	0.853678
sp|P0AA01|NUSG_ECOL6	P0AA01	Transcription antitermination protein NusG OS=Escherichia coli O6:H1 (strain CFT073 / ATCC 700928 / UPEC) GN=nusG PE=3 SV=2	nusG	0.871386	['0.69', '0.67', '0.53', '0.27', '0.20', '0.25', '0.57', '0.63', '0.51', '0.62', '0.86', '1.60', '0.95', '1.69', '0.99', '0.42', '0.34', '0.39', '0.44', '0.37', '0.36', '0.72', '1.35', '1.19', '0.44', '0.43', '0.50', '0.44', '0.50', '0.52', '0.37', '0.34', '0.37', '0.37', '0.39', '0.36', '0.30', '0.29', '0.37']	0.505328	['1.74', '1.66', '1.44', '0.95', '1.00', '1.18', '0.74', '0.95', '0.40', '11.00', '10.19', '7.81', '1.44', '4.93', '1.00', '1.25', '0.76', '1.74', '1.40', '0.68', '1.86', '1.07', '1.09', '1.24', '1.38', '1.12', '1.05', '0.97', '0.94', '0.96', '0.85', '1.15', '1.27', '1.05', '0.59', '0.96', '1.07', '0.63', '0.50', '1.42', '1.46', '1.70', '0.95', '1.23', '1.38', '0.78', '0.66', '0.72', '0.70', '0.8…	1.20676	['1.64', '1.40', '0.84', '0.60', '0.75', '0.56', '1.09', '1.04', '1.33', '0.85', '1.35', '0.85', '0.71', '0.65', '0.57', '0.83', '0.77', '0.74', '0.92', '0.62', '0.65', '0.63', '0.69', '0.88', '1.80', '0.93', '1.11', '0.94', '0.93', '0.91', '0.62', '0.52', '0.59', '0.66', '0.66', '0.63', '0.57', '1.02', '1.19', '1.04', '1.23', '1.16', '0.64', '0.66', '0.65', '0.63', '0.81', '0.54']	0.820231	['1.09', '0.93', '1.43', '0.97', '1.05', '2.29', '0.96', '0.72', '1.93', '4.24', '1.13', '1.79', '1.20', '1.44', '2.04', '0.61', '11.19', '0.79', '0.87', '0.75', '0.53', '1.31', '1.21', '1.27', '0.99', '1.05', '1.35', '2.16', '0.57', '0.44', '1.69', '1.09', '0.82', '0.96', '0.94', '0.64', '0.89', '0.82', '1.00']	1.15269
sp|P0C0L2|OSMC_ECOLI	P0C0L2	Peroxiredoxin OsmC OS=Escherichia coli (strain K12) GN=osmC PE=1 SV=2	osmC	1.00923	['1.36', '1.51', '2.00', '1.76', '1.95', '1.10', '0.95', '1.19', '1.24', '0.80', '1.01', '1.18', '1.39', '2.93', '1.34', '0.41', '2.16', '0.25', '1.32', '1.25', '1.30', '1.44', '1.48', '0.76', '0.92', '0.91', '0.90', '0.65', '0.62', '0.56', '5.32', '8.98', '3.21']	1.26303	['1.21', '0.30', '0.51', '0.72', '0.84', '0.47', '1.29', '1.94', '1.32', '1.37', '1.61', '1.75', '0.24', '0.52', '0.38', '1.42', '2.73', '2.73', '1.60', '0.78', '1.30', '1.91', '1.94', '2.02', '1.31', '1.37', '1.20', '1.44', '0.93', '0.81', '0.83', '0.81', '1.11', '1.52', '0.34', '0.22']	0.994448	['0.81', '0.91', '0.79', '0.67', '1.08', '1.05', '1.41', '1.53', '1.69', '1.17', '1.63', '1.15', '1.36', '1.43', '1.24', '1.54', '1.19', '1.43', '4.00', '0.49', '0.83', '0.47', '0.30', '0.28', '0.22', '0.69', '0.24', '0.97', '0.94', '0.94', '1.23', '1.17', '1.18', '1.50', '1.52', '1.38', '0.41', '0.40', '0.29', '0.25', '0.25', '2.64']	0.861516	['1.92', '1.39', '1.63', '0.16', '2.07', '0.61', '0.70', '0.55', '0.70', '0.66', '0.69', '0.82', '0.95', '0.65', '0.76', '0.93', '0.95', '0.97', '1.02', '0.87', '1.13', '1.15', '1.39', '1.28', '1.25', '1.14', '0.93', '4.98', '0.53', '1.05', '1.08', '1.10', '1.13', '0.95', '0.92', '0.90', '2.00', '2.17', '2.73', '0.67', '0.59', '0.37', '0.70', '0.66', '0.68']	0.958738
sp|B7UII1|PANC_ECO27	B7UII1	Pantothenate synthetase OS=Escherichia coli O127:H6 (strain E2348/69 / EPEC) GN=panC PE=3 SV=1	panC	1.07235	['1.71', '1.75', '1.77', '0.37', '0.25', '0.27', '0.83', '0.85', '0.79', '0.90', '1.06', '0.93', '0.55', '0.63', '1.04', '2.79', '7.36', '3.99', '0.95', '0.97', '0.99', '1.00', '1.27', '1.05', '0.86', '1.10', '1.21', '2.77', '2.05', '2.23', '0.81', '0.92', '0.64', '1.00', '0.58', '1.05']	1.0663	['0.93', '0.77', '0.68', '0.71', '0.80', '0.67', '5.49', '6.53', '3.80', '0.66', '0.41', '1.96', '0.40', '0.36', '0.59', '0.55', '0.30', '0.78', '2.09', '29.57', '26.46', '0.68', '2.06', '3.27', '0.96', '1.28', '0.89', '3.90', '8.41', '5.14', '2.31', '4.69', '2.06', '0.48', '0.51', '0.59', '2.65', '1.78', '0.45', '4.25', '3.85', '2.87', '1.63', '2.40', '1.32', '1.20', '1.18', '0.99']	1.51364	['0.37', '0.35', '0.57', '0.53', '0.66', '1.29', '0.53', '0.46', '0.48', '0.68', '0.69', '0.58', '2.52', '22.43', '26.00', '0.59', '0.61', '0.34', '2.17', '0.97', '1.70', '0.84', '0.33', '0.27', '0.25', '0.34', '0.41', '0.35', '0.27', '0.49', '0.77', '0.83', '1.05', '0.54', '0.98', '0.83', '1.18', '1.04', '0.92', '0.71', '1.01', '0.96']	0.770802	['0.26', '0.61', '0.72', '0.54', '0.70', '0.77', '1.04', '1.23', '1.53', '0.69', '0.89', '0.73', '2.31', '2.18', '1.88', '0.50', '1.52', '0.50', '1.71', '2.32', '2.02', '0.53', '0.39', '1.90', '1.55', '0.92', '1.12', '2.02', '1.03', '1.25', '0.89', '0.96', '0.85', '0.98', '0.82', '0.71', '1.63', '1.25', '1.21', '1.27', '1.86', '4.18', '0.36', '1.29', '2.41']	1.06291
sp|B5YXW1|PDXB_ECO5E	B5YXW1	Erythronate-4-phosphate dehydrogenase OS=Escherichia coli O157:H7 (strain EC4115 / EHEC) GN=pdxB PE=3 SV=1	pdxB	0.996712	['2.11', '2.40', '2.38', '0.62', '0.70', '0.69', '0.64', '1.13', '0.78', '0.61', '1.09', '0.80', '0.77', '0.79', '0.56', '1.15', '0.50', '0.96']	0.916538	['1.60', '1.27', '1.67', '2.35', '2.10', '2.36', '1.18', '0.57', '0.78', '0.86', '0.56', '0.92', '0.60', '1.11', '0.85', '1.04', '0.89', '0.51', '1.19', '0.77', '1.51', '0.74', '0.79', '0.95', '1.03', '0.84', '0.71']	1.00505	['0.98', '1.00', '1.20', '0.92', '1.26', '1.34', '0.81', '0.97', '0.71', '1.07', '0.64', '0.43', '1.10', '2.13', '0.74']	0.95894	['1.04', '1.39', '1.10', '0.57', '0.87', '0.42', '3.54', '1.94', '0.80', '0.97', '0.79', '1.35', '1.07', '1.16', '0.83', '2.17', '1.32', '1.35']	1.11725
sp|A7ZMA0|PDXH_ECO24	A7ZMA0	Pyridoxine/pyridoxamine 5'-phosphate oxidase OS=Escherichia coli O139:H28 (strain E24377A / ETEC) GN=pdxH PE=3 SV=1	pdxH	0.912864	['0.69', '0.61', '0.57', '1.00', '0.98', '0.82', '0.58', '0.53', '1.16', '1.07', '0.51', '0.49', '0.31', '0.57', '0.53', '1.08', '0.68', '1.22']	0.697196	['1.15', '1.08', '1.01', '0.69', '0.90', '1.53', '0.83', '1.27', '1.59', '1.30', '0.72', '1.09']	1.06231	['0.55', '0.62', '0.69', '1.25', '1.79', '1.44', '0.89', '0.90', '1.01', '0.84', '1.34', '0.40', '1.59', '0.49', '1.15']	0.910521	['1.40', '2.63', '0.72', '1.49', '1.40', '0.86', '0.41', '0.30', '0.31', '1.42', '3.34', '2.90', '1.34', '0.51', '0.60', '1.05', '1.53', '1.02']	1.02974
sp|P04825|AMPN_ECOLI	P04825	Aminopeptidase N OS=Escherichia coli (strain K12) GN=pepN PE=1 SV=2	pepN	0.906784	['0.95', '0.43', '0.32', '0.38', '0.70', '0.36', '0.94', '1.06', '0.44', '0.97', '1.28', '1.15', '0.64', '0.55', '0.69', '0.69', '0.48', '1.47', '0.97', '1.26', '1.30', '0.72', '0.53', '0.43', '0.36', '1.75', '0.63', '0.73', '0.88', '0.56', '0.89', '1.52', '1.63', '1.04', '0.55', '0.55', '0.68', '0.65', '0.67', '1.89', '2.18', '1.90', '1.14', '1.97', '2.05', '1.54', '1.09', '2.45', '1.00', '0.86'…	0.874528	['0.91', '1.39', '1.61', '1.89', '2.37', '2.12', '1.34', '2.07', '1.58', '1.08', '1.11', '1.37', '0.47', '0.34', '1.92', '1.20', '0.70', '2.18', '1.04', '1.04', '0.82', '1.43', '1.43', '0.93', '0.53', '0.46', '0.83', '0.96', '0.38', '0.36', '1.20', '1.04', '1.12', '0.90', '0.60', '1.32', '0.52', '0.48', '0.52', '1.14', '0.94', '1.16', '1.11', '1.92', '0.95', '1.10', '0.99', '0.93', '0.70', '0.84'…	0.998792	['0.60', '2.27', '2.54', '0.72', '0.64', '0.50', '0.57', '0.43', '0.62', '0.95', '0.74', '0.56', '0.91', '0.74', '1.16', '0.98', '0.54', '1.35', '0.28', '0.27', '0.06', '1.08', '0.52', '0.98', '0.75', '0.62', '0.82', '0.74', '1.14', '0.58', '0.59', '0.67', '0.54', '0.76', '2.50', '1.63', '0.18', '0.26', '0.13', '1.02', '0.57', '0.98', '0.87', '0.97', '0.67', '0.55', '0.70', '0.74', '0.51', '0.92'…	0.683782	['1.41', '5.24', '5.03', '0.60', '0.96', '0.56', '1.05', '1.07', '1.14', '0.93', '1.12', '1.07', '1.69', '4.48', '3.35', '0.77', '1.18', '1.32', '0.88', '2.05', '0.82', '1.45', '4.37', '6.82', '0.96', '1.16', '0.77', '1.00', '0.88', '0.53', '1.34', '1.06', '0.82', '1.29', '1.22', '3.55', '1.06', '1.13', '1.29', '1.00', '1.01', '1.49', '3.18', '0.93', '0.75', '2.37', '2.03', '2.43', '0.59', '1.15'…	1.132
sp|P15034|AMPP_ECOLI	P15034	Xaa-Pro aminopeptidase OS=Escherichia coli (strain K12) GN=pepP PE=1 SV=2	pepP	0.941553	['1.04', '0.69', '6.48', '0.35', '0.66', '0.47', '0.72', '0.67', '0.75', '0.91', '0.82', '0.40']	0.785458	['0.45', '1.42', '1.53', '0.65', '0.77', '4.18', '1.89', '2.31', '0.71', '0.97', '1.42', '2.21', '1.04', '0.84', '1.17', '2.47', '2.16', '3.19', '4.75', '1.75', '2.01', '3.25', '7.99', '4.48']	1.74625	['0.50', '0.69', '0.15', '0.70', '0.65', '0.65', '1.09', '1.25', '1.18', '1.15', '1.01', '1.05', '0.47', '0.29', '0.30', '0.36', '0.32', '0.52', '0.24', '0.40', '0.28']	0.535987	['1.87', '1.47', '1.17', '1.23', '1.09', '0.76', '0.68', '0.60', '0.44', '0.18', '1.28', '1.42', '1.06', '1.15', '1.08', '1.98', '1.16', '0.74', '1.26', '1.11', '1.11', '1.83', '1.62', '1.93', '1.12', '1.26', '1.32', '0.95', '1.05', '1.07']	1.06904
sp|P06999|K6PF2_ECOLI	P06999	6-phosphofructokinase isozyme 2 OS=Escherichia coli (strain K12) GN=pfkB PE=1 SV=2	pfkB	0.897364	['0.84', '1.34', '1.69', '0.88', '2.06', '1.14', '0.86', '3.11', '0.82', '0.04', '0.05', '0.58', '1.07', '1.06', '1.08', '0.07', '0.10', '0.17', '0.02', '0.06', '4.07', '3.66', '3.93', '4.01', '1.17', '1.05', '0.93']	0.635333	['1.09', '2.21', '1.04', '1.40', '0.47', '0.98', '0.59', '1.25', '0.36', '2.23', '1.46', '1.35', '1.21', '0.98', '0.93', '0.91', '0.62', '1.03', '1.07', '1.31', '1.10', '1.27', '1.68', '1.39', '0.96', '0.68', '0.85', '1.45', '0.99', '1.55', '3.86', '3.31', '2.56', '0.80', '0.76', '0.71', '0.80', '0.76', '0.53', '1.21', '1.32', '0.77', '1.07', '1.08', '0.76']	1.08115	['0.40', '0.44', '0.46', '0.37', '0.44', '0.53', '0.19', '1.09', '0.45', '1.51', '1.37', '0.99', '0.95', '0.86', '0.77', '1.55', '0.89', '1.24', '1.71', '2.93', '1.35', '0.73', '0.51', '0.62', '0.75', '8.56', '6.51', '0.76', '0.66', '0.60', '2.23', '3.87', '0.24', '4.81', '4.82', '4.83', '0.82', '0.73', '0.89']	1.03326	['1.10', '1.23', '1.34', '1.99', '2.20', '2.08', '0.78', '0.96', '0.98', '1.42', '0.64', '0.89', '1.24', '1.10', '1.08', '1.23', '1.02', '1.28', '1.01', '1.74', '1.16', '1.60', '1.66', '1.15', '1.58', '1.01', '0.82', '0.24', '0.22', '0.58', '0.08', '0.27', '0.28', '0.75', '0.59', '1.15', '1.19', '1.29', '1.10']	0.913646
sp|P0A9N5|PFLA_ECOL6	P0A9N5	Pyruvate formate-lyase 1-activating enzyme OS=Escherichia coli O6:H1 (strain CFT073 / ATCC 700928 / UPEC) GN=pflA PE=3 SV=2	pflA	0.899644	['0.28', '0.18', '0.30', '0.42', '0.40', '0.38', '0.57', '0.72', '0.52', '0.35', '0.98', '0.80', '0.59', '0.40', '0.51', '0.55', '0.70', '1.84', '0.79', '0.65', '0.55', '0.42', '0.45', '0.69', '1.16', '0.50', '0.68', '0.34', '0.77', '0.29', '0.15', '0.87', '0.80']	0.524176	['1.42', '0.64', '1.11', '0.65', '0.59', '0.73', '0.93', '0.99', '1.12', '1.55', '3.79', '2.44', '0.86', '0.85', '0.92', '1.49', '0.64', '1.37', '0.50', '1.45', '1.25', '1.25', '0.58', '0.40', '1.02', '1.48', '1.52', '0.84', '0.89', '0.54', '0.66', '0.69', '0.66', '2.28', '0.89', '1.27', '0.54', '1.06', '0.94', '0.35', '2.08', '3.33']	0.996956	['1.75', '0.50', '1.68', '0.77', '0.93', '1.25', '0.94', '0.76', '0.83', '0.86', '1.98', '1.98', '0.41', '0.53', '0.81', '0.69', '0.71', '0.77', '0.58', '0.69', '0.60', '1.13', '1.84', '1.26', '2.99', '3.16', '3.60', '0.61', '0.64', '2.21', '1.72', '1.43', '3.47', '0.38', '4.48', '0.68']	1.0999	['3.14', '1.53', '9.91', '0.90', '1.85', '1.96', '1.78', '1.18', '0.72', '1.16', '0.38', '0.85', '1.00', '0.67', '0.59', '0.54', '0.80', '1.06', '1.00', '1.07', '0.90']	1.13966
sp|P09373|PFLB_ECOLI	P09373	Formate acetyltransferase 1 OS=Escherichia coli (strain K12) GN=pflB PE=1 SV=2	pflB	1.2082	['0.89', '0.91', '0.97', '0.72', '0.74', '0.70', '0.85', '0.93', '0.95', '0.70', '0.68', '0.64', '0.74', '0.77', '0.75', '1.22', '0.45', '1.04', '0.61', '0.46', '0.71', '0.64', '0.69', '0.67', '0.60', '0.65', '0.82', '0.72', '0.70', '0.73', '0.55', '0.56', '0.67', '0.68', '0.66', '0.54', '0.92', '1.27', '0.92', '0.56', '0.64', '0.64', '0.61', '0.63', '0.69', '0.71', '1.01', '0.31', '0.54', '0.67'…	0.738815	['1.09', '1.08', '1.10', '0.91', '0.90', '0.83', '2.85', '2.58', '2.61', '1.20', '1.22', '1.09', '1.05', '1.02', '1.07', '1.32', '15.03', '11.78', '0.98', '0.99', '1.04', '0.96', '0.94', '0.95', '1.00', '0.94', '1.06', '1.00', '1.00', '1.02', '1.35', '1.41', '1.38', '0.97', '0.96', '0.90', '1.91', '1.93', '1.89', '0.37', '0.58', '0.76', '1.00', '1.09', '0.89', '1.09', '0.19', '0.79', '1.08', '1.1…	1.27174	['1.47', '1.58', '1.52', '1.50', '1.44', '1.38', '1.01', '0.97', '1.03', '1.12', '1.06', '1.12', '1.11', '1.12', '1.02', '1.02', '0.75', '0.83', '1.34', '1.38', '1.33', '1.46', '1.46', '1.52', '1.28', '1.19', '1.24', '1.62', '1.52', '1.50', '1.22', '0.92', '1.10', '1.29', '0.91', '0.97', '2.54', '2.62', '2.79', '1.21', '0.91', '1.17', '0.88', '1.04', '0.93', '1.27', '0.07', '1.20', '1.51', '1.50'…	1.07221	['1.62', '2.77', '0.30', '2.15', '2.10', '1.86', '1.57', '2.03', '2.20', '1.88', '1.83', '1.33', '1.99', '0.58', '1.99', '3.48', '0.62', '0.82', '2.94', '1.91', '2.26', '3.48', '3.68', '3.90', '2.85', '2.73', '2.40', '2.06', '3.94', '13.07', '1.98', '2.18', '2.04', '1.64', '1.56', '1.51', '0.90', '1.33', '0.96', '2.24', '2.42', '0.58', '2.96', '2.81', '1.13', '0.26', '0.32', '1.52', '3.48', '3.50…	2.11519
sp|A8A466|PGK_ECOHS	A8A466	Phosphoglycerate kinase OS=Escherichia coli O9:H4 (strain HS) GN=pgk PE=3 SV=1	pgk	0.943512	['0.93', '0.95', '0.92', '1.15', '0.94', '0.94', '1.05', '1.33', '2.12', '5.58', '1.63', '0.90', '0.94', '1.04', '0.63', '0.68', '0.71', '0.66', '1.01', '0.87', '0.76', '0.82', '0.92', '0.90', '0.45', '0.70', '0.39', '1.67', '1.34', '1.04', '2.45', '2.68', '2.72', '3.27', '3.42', '1.25', '1.37', '0.82', '1.94', '1.03', '0.98', '1.08', '0.18', '0.27', '0.94', '0.91', '0.91', '0.92', '0.92', '0.95'…	1.0494	['1.10', '1.20', '1.61', '0.72', '1.11', '0.81', '0.83', '0.83', '1.42', '1.01', '1.76', '0.59', '1.19', '1.20', '1.45', '1.37', '1.14', '0.31', '0.82', '0.85', '0.84', '0.90', '0.90', '0.99', '1.42', '1.76', '1.18', '1.33', '1.53', '0.83', '2.68', '2.31', '1.64', '0.85', '0.70', '0.72', '0.68', '1.77', '3.35', '0.70', '0.40', '0.33', '7.35', '6.14', '7.30', '2.38', '2.52', '1.56', '29.91', '24.7…	1.41391	['0.72', '0.67', '0.81', '2.19', '0.51', '1.15', '0.47', '0.47', '0.48', '0.42', '0.64', '0.77', '2.37', '2.60', '0.80', '0.50', '0.53', '0.64', '0.39', '0.43', '0.46', '0.50', '0.76', '0.88', '0.57', '0.37', '0.45', '0.59', '0.35', '0.51', '0.47', '0.62', '0.34', '0.36', '0.39', '0.39', '0.22', '0.41', '0.37', '0.32', '0.30', '0.16', '0.40', '0.40', '0.39', '0.58', '0.60', '0.99', '0.62', '0.61'…	0.531811	['0.17', '0.24', '0.35', '1.47', '1.22', '6.70', '0.78', '0.81', '3.66', '1.23', '1.40', '1.41', '4.93', '1.94', '3.16', '1.16', '1.29', '3.01', '1.10', '1.07', '1.06', '0.87', '0.93', '0.91', '1.86', '5.13', '0.92', '1.99', '0.96', '1.93', '1.12', '0.98', '0.78', '0.76', '0.72', '0.71', '1.22', '0.77', '1.80', '0.83', '1.06', '0.88', '0.93', '1.16', '1.61', '1.28', '0.66', '0.50', '0.72', '0.92'…	1.00431
sp|P36938|PGM_ECOLI	P36938	Phosphoglucomutase OS=Escherichia coli (strain K12) GN=pgm PE=1 SV=1	pgm	0.85611	['0.40', '0.47', '0.40', '0.76', '0.54', '0.63', '0.43', '0.56', '0.83', '0.97', '1.06', '1.63', '0.67', '0.63', '0.76', '1.20', '1.66', '1.58', '0.77', '0.68', '1.13', '0.94', '0.78', '0.57', '0.75', '0.63', '1.27', '0.58', '0.41', '0.43', '0.70', '0.67', '0.66', '0.80', '0.67', '0.75', '0.89', '0.98', '1.22', '0.45', '0.56', '0.79']	0.736153	['1.38', '0.87', '1.60', '1.33', '1.37', '1.30', '0.61', '0.67', '0.65', '0.56', '0.72', '0.73', '0.50', '0.35', '0.32', '1.56', '1.86', '0.18', '1.53', '1.69', '1.91', '2.13', '1.71', '0.65', '0.78', '0.94', '1.57', '0.81', '0.78', '0.85', '1.08', '0.76', '0.72', '0.78', '1.10', '1.32', '0.78', '0.73', '0.83', '1.59', '2.06', '1.87', '0.42', '0.39', '0.41', '0.75', '0.62', '0.61', '0.36', '0.28'…	0.82982	['0.55', '0.46', '0.37', '0.41', '1.20', '0.59', '0.92', '0.60', '0.26', '0.50', '0.50', '0.77', '0.83', '0.83', '1.57', '0.47', '0.42', '0.53', '0.37', '0.54', '0.59', '0.64', '0.65', '0.78', '1.31', '0.72', '5.96', '0.69', '1.38', '0.66', '0.67', '17.09', '7.40', '0.80', '0.52', '0.78', '0.66', '0.63', '0.48', '0.46', '0.83', '0.67', '0.37', '0.41', '0.42']	0.736191	['2.14', '3.02', '1.20', '1.56', '1.81', '1.28', '0.99', '2.48', '8.46', '0.87', '1.08', '1.21', '1.06', '0.49', '0.56', '0.60', '0.62', '0.68', '0.66', '0.93', '1.23', '0.82', '0.76', '0.87', '0.66', '0.94', '0.90', '1.39', '0.90', '0.87', '6.81', '7.73', '3.66', '6.49', '5.13', '3.25', '1.89', '1.75', '1.52', '1.58', '1.20', '1.04', '2.28', '1.31', '2.32', '1.18', '0.57', '0.64', '0.66', '0.45'…	1.19447
sp|P0AFJ3|PHNA_ECO57	P0AFJ3	Protein phnA OS=Escherichia coli O157:H7 GN=phnA PE=4 SV=1	phnA	1.02965	['0.40', '0.42', '0.42', '0.37', '0.35', '0.71', '1.21', '0.87', '1.07', '1.11', '1.19', '1.02', '0.69', '1.11', '0.52']	0.691277	['1.12', '1.09', '0.81', '0.93', '0.83', '0.89', '1.66', '1.29', '4.29', '0.63', '0.63', '0.70', '0.59', '1.07', '0.58', '8.24', '0.65', '0.76', '1.55', '1.43', '1.76', '2.91', '1.09', '0.83']	1.14571	['1.28', '1.31', '1.28', '1.46', '1.41', '1.42', '1.52', '1.23', '0.86', '1.09', '1.18', '0.99']	1.23739	['1.28', '0.84', '1.47', '1.01', '0.89', '1.15', '2.05', '0.87', '1.74', '2.15', '1.57', '1.75', '0.52', '0.75', '0.66']	1.1469
sp|A7ZS61|PNP_ECO24	A7ZS61	Polyribonucleotide nucleotidyltransferase OS=Escherichia coli O139:H28 (strain E24377A / ETEC) GN=pnp PE=1 SV=1	pnp	0.98536	['0.69', '0.80', '0.71', '0.36', '0.40', '0.23', '0.35', '0.36', '0.36', '1.28', '1.68', '1.34', '1.32', '1.48', '1.14', '0.82', '0.92', '0.90', '1.07', '0.78', '0.42', '6.93', '7.13', '6.58', '0.97', '0.98', '0.21', '1.96', '1.16', '1.86', '2.49', '0.63', '3.58', '1.27', '1.29', '0.97', '1.18', '1.16', '1.27', '1.74', '1.45', '1.66', '1.10', '0.82', '1.25', '2.15', '0.55', '0.54', '0.46', '0.46'…	0.843319	['0.50', '0.56', '0.79', '1.16', '1.01', '1.17', '0.74', '0.54', '0.62', '0.33', '0.38', '0.34', '1.18', '1.12', '1.39', '1.16', '1.42', '1.15', '0.98', '1.09', '1.06', '0.84', '0.78', '1.02', '0.06', '0.06', '0.05', '0.99', '1.00', '0.94', '0.62', '0.60', '0.82', '0.94', '0.74', '0.78', '1.03', '0.42', '1.68', '1.07', '1.04', '0.96', '1.78', '2.16', '1.52', '1.07', '0.96', '0.93', '1.53', '1.40'…	0.981554	['0.77', '0.91', '0.63', '1.18', '1.09', '0.82', '0.99', '2.53', '0.82', '1.45', '1.24', '1.29', '1.59', '1.26', '1.05', '2.89', '2.47', '2.69', '0.90', '0.88', '0.86', '0.95', '0.68', '1.01', '1.46', '1.17', '0.34', '0.41', '1.30', '0.78', '0.80', '0.73', '1.03', '0.89', '0.83', '0.77', '1.01', '0.95', '0.47', '0.66', '1.16', '0.83', '0.84', '0.59', '0.55', '0.58', '0.45', '0.63', '0.92', '0.83'…	0.842366	['1.43', '7.30', '5.77', '7.89', '7.03', '1.02', '0.94', '1.84', '1.21', '1.22', '1.29', '1.09', '2.09', '1.84', '1.83', '0.96', '1.60', '1.99', '1.65', '1.66', '1.40', '1.93', '1.38', '1.34', '3.14', '2.14', '3.72', '2.16', '2.43', '3.50', '1.50', '1.57', '1.55', '2.35', '2.13', '1.92', '0.20', '0.20', '0.57', '1.00', '0.33', '0.49', '0.93', '0.88', '1.30', '1.06', '0.65', '2.14', '1.70', '2.05'…	1.35199
sp|A7ZUH4|CAPP_ECO24	A7ZUH4	Phosphoenolpyruvate carboxylase OS=Escherichia coli O139:H28 (strain E24377A / ETEC) GN=ppc PE=3 SV=1	ppc	0.934716	['0.84', '1.61', '1.16', '1.30', '1.25', '1.48', '1.37', '0.77', '1.16', '1.36', '0.81', '0.70', '0.68', '0.84', '1.12', '0.60', '0.62', '0.57', '0.75', '0.78', '0.71', '0.70', '0.72', '0.52', '0.57', '0.31', '0.45', '1.72', '1.49', '1.64']	0.873008	['1.81', '1.17', '1.77', '1.13', '0.89', '0.81', '0.77', '1.09', '1.50', '0.45', '0.55', '0.78', '1.55', '0.74', '0.62', '1.90', '0.72', '0.95', '0.78', '0.83', '0.76', '0.36', '2.48', '1.85', '1.06', '1.15', '1.08', '1.42', '1.42', '1.42', '1.19', '0.56', '0.56', '0.52', '0.11', '0.47', '1.30', '0.92', '0.51', '1.15', '1.12', '1.70', '0.95', '0.91', '1.63', '1.14', '1.13', '1.61', '1.09', '1.18'…	0.957458	['0.90', '1.01', '0.73', '0.53', '0.98', '0.47', '1.02', '1.33', '0.28', '0.62', '0.66', '0.54', '1.00', '0.79', '1.07', '0.80', '1.04', '0.47', '1.80', '0.86', '0.90', '0.44', '0.64', '0.54', '1.55', '1.33', '1.53', '0.78', '0.86', '0.84', '0.84', '0.50', '0.57']	0.788797	['1.34', '1.72', '1.85', '5.63', '1.93', '0.10', '0.69', '1.72', '1.15', '1.29', '0.95', '1.28', '0.64', '0.60', '0.54', '1.80', '1.54', '1.41', '1.05', '1.10', '0.61', '1.24', '1.11', '1.35', '1.55', '0.28', '0.19', '1.62', '1.37', '1.30', '2.01', '1.94', '1.31', '1.10', '0.94', '1.38', '0.57', '0.72', '5.74', '1.21', '1.09', '1.28', '6.28', '8.66', '2.17', '4.63', '4.16', '1.44', '0.19', '0.41'…	1.15775
sp|P23869|PPIB_ECOLI	P23869	Peptidyl-prolyl cis-trans isomerase B OS=Escherichia coli (strain K12) GN=ppiB PE=1 SV=2	ppiB	1.01638	['0.93', '0.84', '2.15', '0.96', '1.52', '0.91', '1.01', '0.86', '2.22', '0.47', '1.08', '0.30', '0.58', '0.58', '0.60', '0.67', '0.65', '0.65', '0.74', '0.75', '0.62', '0.82', '0.87', '0.98', '0.43', '0.42', '1.04', '0.63', '0.60', '0.64', '0.53', '0.51', '0.63', '0.60', '0.65', '0.60', '0.46', '0.46', '0.59', '0.69', '1.48', '2.25', '0.51', '0.61', '0.57', '1.07', '1.07', '1.04', '1.58', '1.72'…	0.815093	['0.66', '0.89', '0.67', '0.66', '0.41', '0.47', '0.50', '0.60', '0.62', '1.70', '1.37', '3.43', '0.63', '0.60', '0.57', '0.25', '0.28', '0.26', '0.39', '0.90', '0.27', '0.85', '0.84', '0.91', '0.87', '0.94', '0.86', '0.86', '0.81', '0.24', '1.17', '1.21', '1.22', '0.87', '1.03', '1.30', '0.80', '0.85', '1.31', '0.72', '0.91', '0.88', '1.19', '1.39', '1.43', '0.89', '3.57', '6.51', '0.77', '0.73'…	0.995361	['0.91', '1.36', '1.03', '0.74', '1.75', '0.85', '0.75', '0.79', '0.89', '1.31', '1.00', '1.15', '1.00', '1.01', '0.95', '0.55', '0.54', '1.15', '0.71', '1.53', '2.89', '1.03', '1.01', '1.11', '1.53', '1.01', '1.80', '1.12', '0.98', '1.69', '1.33', '1.32', '1.47', '1.40', '1.43', '1.50', '4.24', '1.18', '2.52', '0.64', '0.76', '0.33', '1.03', '2.42', '1.56', '0.56', '1.18', '0.91', '2.85', '2.08'…	1.19072	['2.32', '1.65', '3.39', '1.28', '1.65', '1.41', '0.82', '0.40', '2.52', '1.28', '1.30', '1.69', '1.26', '1.21', '1.09', '1.21', '1.20', '1.70', '1.14', '1.41', '1.15', '0.58', '1.25', '0.92', '1.33', '1.44', '0.57', '1.13', '1.24', '0.83', '1.12', '1.14', '1.28', '1.15', '1.15', '1.11', '0.28', '0.44', '0.94', '1.36', '0.99', '1.67', '3.47', '2.79', '3.21', '0.89', '0.95', '0.79', '0.18', '0.21'…	1.10466
sp|P0A9L6|PPIC_ECOL6	P0A9L6	Peptidyl-prolyl cis-trans isomerase C OS=Escherichia coli O6:H1 (strain CFT073 / ATCC 700928 / UPEC) GN=ppiC PE=3 SV=2	ppiC	0.870904	['0.56', '0.58', '0.68', '0.43', '0.57', '0.53', '1.27', '0.63', '1.01', '0.50', '0.22', '0.42', '1.03', '0.45', '0.52']	0.577189	['0.51', '0.45', '0.45', '1.78', '1.84', '1.17', '1.14', '0.91', '0.99', '1.08', '1.04', '0.91', '0.83', '0.85', '0.84', '0.74', '1.04', '0.91', '0.87', '0.89', '0.87', '1.67', '0.95', '0.98']	0.931894	['0.62', '0.70', '0.82', '0.60', '0.59', '0.62', '1.18', '1.15', '1.42', '0.80', '0.75', '0.79', '2.11', '1.65', '0.75', '0.83', '0.97', '1.35', '0.66', '0.74', '0.82', '0.64', '0.95', '0.91']	0.879148	['1.54', '0.94', '0.96', '1.16', '0.94', '1.31', '1.45', '1.29', '1.55']	1.21656
sp|Q8FF70|PPK_ECOL6	Q8FF70	Polyphosphate kinase OS=Escherichia coli O6:H1 (strain CFT073 / ATCC 700928 / UPEC) GN=ppk PE=3 SV=3	ppk	1.25516			['0.95', '0.74', '1.51', '1.27', '1.75', '1.49', '2.12', '1.35', '1.07']	1.30077			['0.84', '0.43', '1.70', '0.38', '0.58', '0.53', '0.24', '1.50', '0.50', '1.06', '1.08', '1.04', '2.61', '2.51', '3.27', '0.75', '1.01', '0.60', '5.24', '3.02', '3.21', '2.06', '2.18', '2.95']	1.21115
sp|P0A719|KPRS_ECO57	P0A719	Ribose-phosphate pyrophosphokinase OS=Escherichia coli O157:H7 GN=prs PE=3 SV=2	prs	0.86633	['0.93', '0.92', '0.81', '0.73', '0.59', '0.45', '0.84', '0.80', '0.81', '0.65', '0.72', '0.60', '0.66', '0.63', '0.64', '0.39', '0.22', '0.27', '0.66', '0.66', '0.72', '1.06', '0.57', '1.05', '0.45', '0.42', '0.55', '0.64', '0.51', '0.25', '0.40', '0.41', '0.60', '0.40', '0.49', '0.56', '0.41', '0.41', '0.39', '0.53', '0.50', '0.56', '0.37', '0.49', '0.54', '0.47', '0.50', '0.74', '1.10', '0.80'…	0.590717	['1.08', '1.10', '0.92', '0.78', '0.95', '0.94', '1.09', '1.06', '1.07', '1.51', '1.53', '0.70', '1.21', '1.35', '0.69', '1.70', '0.71', '2.27', '1.10', '1.09', '1.13', '1.12', '1.15', '1.47', '1.49', '0.93', '1.17', '0.83', '0.90', '0.95', '0.56', '2.19', '1.00', '1.29', '0.78', '1.36', '1.06', '0.98', '1.54', '1.62', '1.35', '1.57', '1.50', '1.01', '1.04', '1.33', '1.50', '1.44', '1.49', '0.82'…	1.11999	['0.51', '0.46', '0.48', '0.66', '0.51', '0.39', '0.50', '0.63', '0.53', '0.48', '0.54', '0.56', '0.74', '0.53', '1.02', '0.50', '0.51', '0.53', '0.48', '0.42', '0.55', '0.57', '0.42', '0.40', '0.76', '1.06', '1.69', '1.76', '1.10', '1.35', '0.52', '0.43', '0.74', '1.90', '1.11', '1.57', '0.59', '0.70', '0.76', '0.26', '0.32', '0.35', '0.36', '0.45', '0.41', '2.71', '0.72', '0.63', '0.74', '0.85'…	0.683517	['5.88', '3.12', '5.81', '1.01', '2.54', '0.72', '3.51', '2.36', '2.45', '0.97', '1.27', '2.20', '1.55', '1.26', '1.40', '1.36', '1.13', '1.09', '2.80', '2.82', '2.00', '0.61', '0.52', '0.87', '0.53', '0.32', '0.97', '4.62', '1.28', '3.09', '1.14', '1.18', '1.30', '0.48', '1.22', '1.35', '2.33', '0.97', '0.77', '1.55', '0.63', '0.11', '1.50', '1.41', '1.62', '1.32', '1.25', '1.95', '1.49', '1.61'…	1.24563
sp|P0AA05|PTHP_ECOL6	P0AA05	Phosphocarrier protein HPr OS=Escherichia coli O6:H1 (strain CFT073 / ATCC 700928 / UPEC) GN=ptsH PE=3 SV=1	ptsH	0.879412	['0.58', '0.53', '0.58', '0.61', '0.58', '0.70', '0.67', '1.93', '0.48', '0.49', '0.62', '0.61', '0.43', '0.46', '0.50', '0.70', '0.68', '0.64', '0.58', '0.44', '0.62', '0.55', '0.42', '0.38', '0.82', '0.67', '0.62', '0.76', '0.65', '0.35', '0.77', '0.78', '0.76', '0.88', '0.85', '0.81', '0.96', '1.05', '0.57']	0.63467	['1.09', '1.15', '1.12', '1.01', '1.03', '1.11', '0.94', '1.44', '0.91', '1.76', '1.26', '1.07', '3.65', '0.91', '3.53', '0.52', '0.76', '0.51', '0.96', '0.96', '0.97', '0.84', '0.88', '1.15', '7.50', '2.59', '1.53', '0.54', '0.57', '0.53', '5.04', '0.36', '0.46', '0.62', '0.70', '1.21', '1.48', '1.43', '1.39', '1.23', '1.22', '1.23', '1.45', '1.15', '1.39', '1.61', '1.08', '3.22', '0.79', '1.02'…	1.143	['0.56', '0.56', '0.54', '0.55', '0.56', '0.55', '0.60', '0.56', '0.56', '0.66', '0.57', '0.74', '0.65', '0.60', '0.65', '0.86', '1.02', '0.94', '0.55', '0.50', '0.71', '0.67', '0.59', '0.58', '2.28', '1.55', '1.19', '6.02', '1.62', '1.58', '1.59', '0.83', '1.24', '0.99', '1.03', '0.96', '1.40', '1.36', '1.39', '1.40', '1.43', '1.46']	0.899965	['0.76', '0.75', '0.60', '0.84', '0.65', '1.10', '0.80', '1.48', '0.56', '0.81', '1.05', '1.05', '0.82', '1.24', '1.27', '1.21', '0.98', '1.02', '1.19', '1.02', '1.09', '0.80', '1.03', '0.60']	0.916112
sp|P08839|PT1_ECOLI	P08839	Phosphoenolpyruvate-protein phosphotransferase OS=Escherichia coli (strain K12) GN=ptsI PE=1 SV=1	ptsI	0.768905	['1.56', '1.44', '1.40', '0.74', '0.81', '0.50', '0.38', '1.39', '1.09', '0.55', '0.65', '0.31', '1.04', '0.37', '0.48', '0.56', '0.34', '0.66', '0.47', '0.69', '0.53', '0.74', '0.71', '0.67', '0.60', '0.39', '0.59', '0.99', '0.68', '0.79', '0.77', '0.64', '0.79', '0.87', '0.98', '1.14', '0.91', '0.89', '0.78', '0.61', '0.62', '1.32', '0.63', '0.71', '1.12', '1.02', '0.85', '1.03', '0.62', '0.67'…	0.770712	['0.74', '0.53', '0.72', '0.61', '0.72', '0.37', '1.06', '0.92', '0.44', '0.67', '0.65', '0.74', '0.95', '1.11', '1.56', '0.65', '0.61', '0.88', '0.73', '0.62', '0.78', '0.86', '1.06', '1.50', '1.03', '1.11', '1.39', '0.40', '0.45', '0.45', '0.40', '0.37', '0.38', '1.11', '1.04', '1.68', '0.28', '0.04', '0.37', '1.43', '2.00', '1.13', '0.81', '0.41', '0.43', '0.62', '0.53', '0.50', '0.52', '0.60'…	0.814484	['0.52', '0.69', '0.35', '0.59', '0.57', '0.78', '0.64', '0.91', '0.60', '0.88', '1.03', '0.50', '0.51', '0.56', '0.76', '0.48', '0.66', '0.93', '0.50', '1.16', '1.00', '0.86', '0.71', '0.77', '0.58', '0.52', '0.63', '0.62', '0.75', '2.18', '0.70', '1.14', '0.81', '0.64', '0.33', '0.40', '0.28', '0.36', '0.68', '0.41', '0.75', '0.48', '0.86', '0.74', '1.02', '0.45', '1.17', '0.95', '0.26', '0.30'…	0.604179	['0.39', '0.45', '0.41', '1.63', '2.32', '0.80', '1.77', '2.74', '1.97', '0.92', '0.19', '1.28', '1.80', '1.79', '1.76', '1.14', '0.43', '1.16', '1.32', '1.23', '1.03', '0.93', '1.13', '1.05', '1.10', '0.84', '0.83', '1.07', '1.06', '1.10', '0.73', '0.76', '0.40', '1.07', '1.05', '1.04', '1.61', '1.65', '1.28', '1.01', '0.86', '0.63', '0.16', '0.21', '0.32', '0.28', '0.63', '0.30', '0.66', '0.65'…	0.921615
sp|B7UQI6|PURA_ECO27	B7UQI6	Adenylosuccinate synthetase OS=Escherichia coli O127:H6 (strain E2348/69 / EPEC) GN=purA PE=3 SV=1	purA	0.657782	['0.33', '0.43', '0.42', '0.42', '0.62', '1.18', '0.37', '0.46', '0.44', '0.56', '0.52', '0.52', '0.74', '0.78', '0.80', '1.01', '0.96', '0.88', '1.02', '1.05', '1.04', '0.17', '0.35', '0.60', '0.52', '0.55', '0.60', '0.46', '0.50', '0.30', '1.18', '0.85', '1.18', '0.78', '0.62', '0.67', '0.96', '0.81', '1.07', '0.49', '0.46', '0.57', '0.39', '0.34', '0.42', '0.39', '0.34', '0.36', '1.11', '1.25'…	0.568295	['0.53', '0.72', '0.53', '0.76', '0.44', '0.81', '0.73', '1.09', '1.15', '0.68', '2.33', '0.54', '0.49', '0.52', '0.43', '0.37', '0.39', '0.34', '0.23', '0.34', '0.26', '0.40', '0.47', '0.41', '0.76', '0.76', '0.67', '0.51', '0.51', '1.12', '0.61', '0.45', '0.68', '1.46', '1.57', '1.95', '0.99', '0.95', '0.88', '0.99', '0.50', '0.93', '0.21', '0.19', '1.67', '0.52', '0.56', '0.55', '0.41', '0.33'…	0.779319	['0.67', '0.73', '0.53', '5.04', '0.86', '0.99', '0.52', '0.32', '0.48', '0.46', '1.40', '0.57', '0.39', '0.42', '0.44', '0.52', '0.64', '0.88', '0.30', '0.33', '0.30', '0.31', '0.31', '0.40', '0.44', '0.76', '0.54', '0.81', '0.37', '0.38', '0.49', '0.30', '0.34', '0.41', '0.38', '0.66', '1.45', '1.16', '1.13', '0.54', '0.39', '0.38', '0.78', '0.80', '0.86', '0.34', '0.35', '0.36', '0.90', '0.81'…	0.48183	['0.82', '0.50', '0.84', '1.17', '0.76', '0.75', '0.78', '0.46', '0.83', '0.56', '0.90', '0.52', '0.92', '1.70', '2.99', '0.09', '0.58', '0.08', '0.10', '2.88', '0.17', '1.49', '1.49', '2.32', '1.02', '0.76', '0.83', '0.90', '0.84', '0.84', '1.08', '1.51', '1.12', '1.84', '1.12', '1.78', '1.21', '1.34', '1.18', '0.79', '0.75', '0.79', '1.05', '0.73', '1.09', '1.22', '1.18', '1.28', '0.74', '0.76'…	0.877293
sp|P0AB89|PUR8_ECOLI	P0AB89	Adenylosuccinate lyase OS=Escherichia coli (strain K12) GN=purB PE=1 SV=1	purB	0.958091	['0.62', '0.78', '0.62', '0.37', '0.70', '0.53', '0.77', '0.76', '0.80', '0.93', '0.91', '0.93', '0.98', '0.72', '0.56', '1.03', '0.77', '0.84', '1.11', '1.25', '1.09', '0.91', '1.14', '0.76', '0.57', '1.18', '1.05', '1.77', '1.42', '0.84', '0.77', '0.77', '0.77', '0.54', '0.79', '0.86', '1.36', '1.03', '0.58', '1.00', '0.83', '1.20', '1.44', '2.51', '0.76', '0.55', '0.94', '1.00', '3.09', '0.88'…	0.921382	['0.93', '0.91', '0.95', '0.47', '3.53', '0.73', '0.80', '0.93', '0.61', '0.93', '0.85', '1.32', '0.59', '1.43', '1.30', '1.12', '2.90', '1.73', '1.11', '0.79', '0.55', '0.66', '0.46', '0.29', '0.43', '0.81', '0.49', '0.82', '0.83', '0.79', '0.71', '4.10', '1.06', '1.14', '1.42', '0.78', '1.15', '1.48', '0.98', '0.68', '0.44', '1.16', '1.03', '0.81', '0.97', '0.93', '0.81', '1.57', '1.11', '1.24'…	0.948619	['0.64', '0.73', '0.60', '0.80', '0.71', '1.14', '0.65', '0.82', '0.96', '0.84', '0.60', '0.61', '1.15', '10.47', '10.96', '0.39', '0.54', '0.22', '0.96', '0.76', '0.33', '0.51', '1.00', '0.62', '0.46', '0.53', '0.54', '0.53', '0.55', '0.67', '0.48', '0.68', '0.62', '0.29', '0.31', '0.43', '0.32', '0.65', '0.68', '1.30', '1.72', '1.85', '0.64', '0.71', '1.36', '1.40', '2.01', '2.54']	0.780419	['1.03', '1.24', '0.91', '4.19', '7.17', '1.60', '1.17', '1.18', '1.17', '0.78', '0.84', '0.21', '1.21', '1.10', '1.43', '1.59', '1.56', '1.24', '1.46', '1.64', '1.76', '1.24', '0.77', '1.17', '2.34', '1.92', '2.26', '1.64', '1.40', '0.59', '2.03', '1.17', '2.44', '1.30', '1.16', '1.24', '0.67', '1.93', '0.72', '0.65', '0.83', '1.00', '1.34', '1.47', '1.00', '0.93', '1.43', '1.01', '0.44', '0.71'…	1.23529
sp|B7UGM6|PUR7_ECO27	B7UGM6	Phosphoribosylaminoimidazole-succinocarboxamide synthase OS=Escherichia coli O127:H6 (strain E2348/69 / EPEC) GN=purC PE=3 SV=1	purC	0.798975	['0.94', '0.95', '0.71', '0.96', '0.95', '0.52', '2.73', '0.64', '0.65', '0.78', '0.79', '0.74', '1.29', '0.80', '0.41', '1.26', '1.30', '1.52', '0.60', '0.73', '0.81', '0.46', '0.52', '0.58', '0.17', '0.21', '0.66', '4.45', '4.10', '5.62', '1.29', '1.77', '2.10', '1.29', '1.23', '2.90', '0.84', '0.80', '0.77', '0.66', '0.87', '0.46', '1.07', '0.98', '1.13', '1.82', '0.42', '0.23']	0.912593	['2.39', '2.13', '1.65', '1.85', '1.88', '1.45', '0.78', '0.70', '0.79', '0.66', '0.82', '0.83', '0.86', '0.83', '0.82', '1.20', '1.83', '2.79', '0.91', '0.99', '0.93', '0.68', '0.79', '0.88', '0.40', '0.52', '0.68', '1.58', '0.97', '0.97', '0.17', '0.29', '0.59', '1.99', '2.91', '2.12', '0.55', '0.60', '0.58', '0.99', '1.16', '1.01', '5.81', '0.20', '6.36', '1.64', '2.21', '0.97', '1.20', '0.56'…	1.01405	['0.51', '0.48', '0.58', '0.62', '0.58', '0.69', '0.69', '0.65', '0.71', '0.61', '0.58', '0.53', '0.49', '0.48', '0.58', '0.89', '0.77', '0.98', '0.69', '0.80', '0.55', '0.64', '0.63', '0.90', '0.52', '0.81', '1.32', '0.23', '0.21', '0.17', '0.34', '0.30', '0.36', '0.51', '0.48', '0.57', '0.53', '0.38', '0.56', '0.56', '0.46', '0.51', '0.51', '0.46', '0.47']	0.538223	['1.16', '1.14', '1.18', '0.97', '1.00', '0.85', '3.31', '1.91', '1.40', '0.74', '0.67', '0.78', '0.61', '1.45', '1.63', '1.13', '0.75', '1.36', '1.00', '0.84', '1.04', '0.71', '0.58', '0.42', '0.39', '0.42', '0.51', '0.46', '0.52', '0.71', '0.37', '0.41', '0.74', '0.16', '1.69', '0.24', '1.11', '1.05', '1.11', '1.00', '0.91', '1.19', '1.00', '0.86', '0.85']	0.818152
sp|Q0TET1|PUR4_ECOL5	Q0TET1	Phosphoribosylformylglycinamidine synthase OS=Escherichia coli O6:K15:H31 (strain 536 / UPEC) GN=purL PE=3 SV=3	purL	0.827847	['1.00', '0.79', '1.31', '0.71', '0.60', '0.61', '0.50', '0.70', '0.19', '0.60', '0.66', '0.65', '0.75', '0.52', '0.52', '0.66', '0.57', '0.74', '1.06', '1.90', '3.07', '1.38', '0.64', '1.18', '1.41', '0.89', '0.77', '5.74', '2.05', '0.59', '1.92', '2.00', '1.94', '0.34', '0.26', '0.46', '0.62', '0.68', '0.72', '0.67', '0.64', '0.67', '0.62', '0.58', '1.18', '0.59', '0.56', '0.64', '0.58', '0.60'…	0.786611	['0.55', '0.57', '0.68', '1.73', '1.30', '0.67', '0.50', '0.39', '0.41', '11.53', '14.81', '7.94', '15.01', '3.78', '6.96', '0.81', '0.78', '0.88', '0.66', '1.25', '1.25', '0.65', '0.70', '0.57', '0.77', '0.63', '0.74', '0.77', '0.79', '0.79', '1.39', '3.50', '1.87', '0.54', '0.66', '0.99', '0.95', '1.56', '0.61', '1.61', '1.11', '1.06', '0.66', '0.75', '0.65', '0.69', '0.78', '0.91', '0.69', '0.…	1.12654	['0.49', '0.77', '0.81', '0.61', '2.05', '2.36', '0.54', '0.44', '0.39', '0.06', '0.12', '0.19', '0.35', '0.45', '0.46', '0.31', '0.55', '0.79', '1.02', '1.10', '1.22', '0.19', '0.67', '0.34', '0.19', '0.51', '0.20', '0.37', '0.29', '0.67', '0.41', '0.35', '0.72', '0.60', '0.79', '0.35', '1.36', '0.78', '0.91', '0.52', '0.61', '0.38', '0.62', '0.51', '0.64', '0.52', '0.52', '0.54', '0.54', '0.64'…	0.511364	['2.48', '1.78', '2.46', '0.67', '0.72', '1.46', '1.64', '4.14', '1.54', '0.49', '0.71', '0.84', '0.87', '0.87', '0.99', '0.82', '0.85', '0.86', '0.09', '1.39', '1.37', '1.77', '1.67', '1.06', '0.82', '0.81', '0.71', '1.23', '4.89', '3.03', '0.59', '1.67', '0.83', '0.47', '1.09', '0.67', '2.37', '1.64', '0.45', '0.51', '0.51', '0.87', '0.46', '0.42', '0.41', '0.80', '0.63', '1.18', '0.81', '1.16'…	1.03649
sp|B1XHB7|PURT_ECODH	B1XHB7	Phosphoribosylglycinamide formyltransferase 2 OS=Escherichia coli (strain K12 / DH10B) GN=purT PE=3 SV=1	purT	0.790826	['0.74', '0.75', '0.55', '0.78', '1.01', '0.98', '0.84', '0.76', '1.16', '0.91', '1.25', '1.16', '0.21', '0.24', '0.19', '0.92', '4.37', '0.44', '0.85', '0.81', '0.45', '0.66', '0.92', '0.76', '0.53', '0.57', '0.55', '0.70', '0.51', '1.31', '0.51', '0.43', '0.57', '0.81', '0.90', '0.68', '0.96', '1.08', '0.87']	0.718011	['0.62', '0.66', '0.54', '0.59', '0.59', '0.63', '0.63', '0.43', '0.47', '1.57', '1.68', '2.26', '0.63', '1.27', '1.37', '0.76', '0.78', '1.13', '0.60', '0.67', '0.28', '0.90', '0.84', '1.01', '0.26', '0.50', '0.37', '0.64', '0.52', '0.61', '0.59', '0.86', '0.77', '1.04', '1.38', '1.33']	0.736666	['0.25', '0.40', '0.60', '0.72', '0.43', '0.66', '0.39', '0.78', '1.83', '2.99', '0.88', '0.42', '0.98', '0.05', '0.31', '0.91', '0.55', '0.54', '0.60', '0.62', '1.16', '0.60', '0.80', '0.67', '0.46', '0.48', '1.26', '2.68', '1.67', '4.80', '0.72', '0.69', '0.58', '0.24', '0.24', '0.31']	0.640893	['0.54', '0.22', '0.17', '0.54', '0.75', '0.59', '0.63', '0.66', '0.54', '8.05', '10.08', '37.51', '2.65', '1.45', '1.05', '1.99', '0.55', '1.32', '1.23', '1.39', '1.19', '2.65', '1.49', '1.79', '1.20', '1.00', '0.84', '1.46', '1.51', '0.70', '2.44', '1.73', '1.56', '0.83', '1.12', '1.02', '0.98', '1.05', '1.00', '0.67', '0.66', '0.80', '0.89', '1.06', '0.71']	1.15381
sp|P37051|PURU_ECOLI	P37051	Formyltetrahydrofolate deformylase OS=Escherichia coli (strain K12) GN=purU PE=1 SV=1	purU	0.930875	['0.72', '0.59', '1.05', '0.83', '0.81', '0.94', '0.73', '0.67', '0.62', '1.33', '0.80', '1.63']	0.853231	['0.80', '0.95', '0.99', '0.92', '1.15', '1.31', '1.20', '0.85', '0.41', '1.11', '2.45', '0.88']	1.00501	['1.10', '0.65', '1.54', '0.74', '0.61', '0.67', '0.67', '0.48', '0.56', '0.80', '1.09', '0.86', '0.92', '1.08', '0.70']	0.793739	['1.34', '0.86', '0.90', '1.40', '1.36', '1.54', '1.35', '1.34', '1.27', '0.52', '1.28', '0.47', '1.25', '1.42', '1.15']	1.10319
sp|P21599|KPYK2_ECOLI	P21599	Pyruvate kinase II OS=Escherichia coli (strain K12) GN=pykA PE=1 SV=3	pykA	0.873059	['0.89', '0.36', '0.80', '0.35', '0.34', '0.38', '0.71', '0.73', '0.63', '0.46', '0.58', '1.28', '0.38', '0.27', '0.75', '0.54', '0.79', '0.55', '0.39', '0.40', '0.41', '0.76', '0.55', '0.55', '1.31', '1.16', '0.95', '0.99', '0.95', '1.45', '0.52', '0.50', '5.12', '1.64', '0.49', '1.29', '0.71', '0.65', '0.53', '0.33', '0.31', '0.36', '0.39', '0.30', '0.23', '0.59', '1.05', '1.10', '0.74', '0.73'…	0.569546	['0.40', '0.21', '3.79', '0.68', '0.68', '0.96', '1.08', '1.24', '0.87', '0.86', '1.04', '1.29', '0.66', '0.62', '0.45', '0.53', '0.84', '0.89', '0.99', '1.11', '1.10', '3.19', '3.51', '3.59', '1.06', '0.99', '0.91', '0.94', '1.00', '0.94', '0.75', '0.65', '1.60', '2.24', '0.24', '0.11', '1.83', '1.78', '2.02', '1.26', '1.56', '2.26', '0.30', '0.74', '1.20', '0.65', '1.05', '1.30', '0.55', '0.48'…	0.909726	['0.73', '0.60', '2.38', '0.59', '0.65', '0.58', '0.72', '0.73', '1.17', '1.46', '1.99', '2.52', '0.81', '0.79', '0.94', '0.71', '0.52', '0.89', '0.46', '0.55', '0.43', '0.50', '0.60', '0.89', '1.37', '1.31', '1.06', '0.92', '0.71', '0.40', '1.18', '0.68', '0.83', '3.60', '0.58', '0.39', '0.64', '0.64', '0.67', '0.49', '0.49', '0.47', '0.56', '0.60', '0.65', '0.40', '0.60', '0.76', '1.37', '1.50'…	0.751726	['2.88', '1.48', '1.10', '2.27', '2.20', '1.14', '4.00', '2.85', '0.77', '0.19', '0.57', '0.85', '1.94', '2.00', '1.13', '1.43', '1.67', '0.87', '1.51', '1.65', '1.40', '1.29', '2.03', '1.91', '2.09', '2.00', '1.98', '1.77', '2.17', '2.02', '1.05', '1.59', '1.14', '0.99', '1.47', '1.36', '1.45', '1.56', '1.25', '1.76', '1.84', '1.80', '1.53', '1.58', '1.48', '1.14', '1.52', '0.97', '1.49', '1.08'…	1.49168
sp|P0AD62|KPYK1_ECO57	P0AD62	Pyruvate kinase I OS=Escherichia coli O157:H7 GN=pykF PE=3 SV=1	pykF	0.759016	['0.81', '0.85', '0.87', '0.86', '0.84', '0.72', '0.66', '1.25', '0.92', '0.99', '0.60', '0.67', '0.55', '0.10', '0.05', '0.88', '0.10', '0.03', '0.95', '0.92', '1.27', '0.96', '0.73', '0.43', '0.70', '0.65', '0.44', '1.16', '1.11', '1.26', '0.54', '0.54', '0.55', '0.55', '0.55', '0.62', '0.76', '0.70', '0.83', '1.03', '0.87', '0.94', '1.00', '1.04', '1.00', '0.78', '0.99', '1.27', '0.84', '0.85'…	0.725878	['0.53', '0.55', '0.56', '0.56', '0.55', '0.56', '2.04', '1.64', '1.79', '0.48', '0.37', '0.40', '0.67', '0.46', '0.60', '0.57', '0.56', '0.57', '0.94', '0.72', '0.98', '0.63', '0.54', '0.52', '0.49', '0.94', '0.45', '0.54', '0.51', '0.57', '0.97', '1.18', '0.83', '1.18', '1.19', '0.88', '0.44', '0.48', '0.58', '0.89', '0.91', '0.81', '0.64', '0.65', '0.64', '1.86', '1.59', '2.09', '0.90', '0.91'…	0.798016	['0.39', '0.35', '0.39', '0.66', '0.65', '0.68', '0.75', '0.65', '0.68', '1.11', '0.59', '0.64', '0.62', '0.53', '0.53', '0.60', '0.49', '0.42', '0.59', '0.54', '0.77', '0.76', '0.79', '1.28', '0.54', '0.52', '0.46', '0.77', '0.70', '0.68', '0.55', '0.64', '0.48', '0.59', '0.58', '0.70', '0.37', '0.43', '0.61', '0.50', '0.53', '0.79', '0.32', '0.45', '0.34', '0.44', '0.37', '0.51', '0.32', '0.26'…	0.578036	['1.21', '1.24', '1.36', '1.28', '1.25', '1.22', '1.75', '3.75', '7.11', '1.28', '0.64', '0.62', '0.93', '0.67', '0.65', '0.80', '0.75', '0.71', '0.78', '1.02', '1.08', '0.92', '0.94', '1.13', '0.90', '0.86', '1.21', '1.04', '1.19', '1.25', '1.40', '1.36', '1.40', '1.66', '1.43', '1.41', '1.58', '1.40', '1.18', '0.66', '0.89', '1.01', '0.34', '0.66', '0.37', '0.64', '0.89', '0.88', '0.67', '0.72'…	0.991228
sp|B7UQQ5|PYRB_ECO27	B7UQQ5	Aspartate carbamoyltransferase OS=Escherichia coli O127:H6 (strain E2348/69 / EPEC) GN=pyrB PE=3 SV=1	pyrB	0.900004	['21.29', '7.74', '11.07', '0.41', '0.90', '0.27', '0.77', '0.83', '0.92', '0.80', '0.69', '0.59', '0.91', '0.57', '0.28', '1.20', '1.14', '0.40', '0.68', '0.78', '0.72', '0.97', '0.70', '1.12', '1.24', '2.26', '2.50', '0.91', '0.99', '1.87', '0.69', '0.73', '2.53', '0.72', '0.68', '0.54', '0.50', '0.71', '0.38', '0.53', '0.99', '1.19', '1.86', '1.07', '1.58', '0.86', '0.80', '1.18']	0.992745	['0.35', '0.24', '0.19', '0.91', '1.01', '0.55', '2.04', '1.14', '1.33', '0.57', '0.55', '0.74', '0.72', '0.59', '0.58', '0.47', '0.44', '0.79', '0.66', '0.68', '0.77', '0.31', '0.52', '0.73', '0.70', '0.70', '0.71', '0.72', '0.58', '0.89', '1.45', '0.77', '0.66', '1.95', '3.14', '2.94', '0.87', '1.19', '1.14', '0.74', '0.76', '0.84', '0.43', '0.71', '0.91', '0.48', '1.52', '1.04', '1.17', '0.20'…	0.821002	['0.64', '0.95', '0.70', '1.04', '0.85', '0.68', '0.76', '0.45', '0.63', '1.11', '1.14', '1.61', '1.08', '0.91', '0.79', '0.79', '0.88', '0.46', '0.64', '0.74', '0.60', '1.03', '0.79', '0.70', '0.85', '0.68', '1.00', '0.46', '0.45', '0.14', '0.42', '0.44', '0.39', '0.69', '2.51', '3.40', '0.42', '0.74', '1.16', '0.81', '0.83', '0.75', '0.86', '0.95', '0.87', '0.76', '1.33', '0.42', '0.37', '0.53'…	0.74971	['4.21', '4.29', '2.62', '0.97', '1.55', '1.89', '1.50', '1.64', '1.42', '2.53', '1.07', '2.27', '1.71', '2.21', '1.24', '0.44', '2.08', '0.94', '1.26', '1.70', '1.42', '1.89', '2.07', '1.69', '1.54', '1.05', '0.95', '0.46', '0.38', '0.34', '1.38', '1.33', '1.22', '1.51', '0.74', '0.52', '1.44', '1.02', '0.58', '1.31', '1.91', '0.92', '0.55', '1.00', '0.75', '0.79', '0.72', '0.49', '1.38', '1.52'…	1.07375
sp|B7UHJ6|PYRG_ECO27	B7UHJ6	CTP synthase OS=Escherichia coli O127:H6 (strain E2348/69 / EPEC) GN=pyrG PE=3 SV=1	pyrG	0.801123	['0.64', '0.37', '0.14', '0.71', '0.63', '0.90', '0.53', '0.58', '0.57', '1.11', '0.80', '0.71', '0.48', '0.46', '0.71', '0.62', '0.91', '0.72', '1.04', '1.26', '1.78', '0.45', '0.69', '0.50', '0.49', '0.61', '0.88', '0.51', '0.95', '0.74', '0.55', '0.51', '0.63', '0.58', '0.62', '0.52', '0.62', '0.71', '0.54', '0.51', '0.69', '0.80', '0.63', '0.49', '0.47', '0.98', '2.51', '2.32', '0.43', '0.47'…	0.664284	['1.23', '1.02', '2.64', '1.23', '0.97', '1.22', '0.99', '0.98', '1.08', '0.42', '0.62', '1.18', '4.66', '3.41', '8.33', '1.37', '1.05', '2.03', '0.80', '0.91', '0.48', '0.86', '0.41', '0.98', '1.88', '1.86', '1.95', '0.76', '0.89', '1.85', '0.45', '0.64', '0.51', '0.57', '0.37', '0.72', '0.83', '0.94', '0.91', '1.37', '0.99', '1.01', '0.84', '0.69', '1.27', '0.68', '0.64', '0.86', '0.90', '0.91'…	0.863126	['1.17', '0.30', '0.84', '0.77', '0.97', '1.12', '0.69', '0.63', '0.49', '0.17', '0.39', '0.96', '0.64', '0.52', '0.44', '1.34', '0.78', '0.42', '1.25', '0.88', '1.22', '0.36', '0.38', '0.39', '0.46', '0.41', '0.43', '0.96', '1.20', '1.20', '0.50', '0.60', '0.87', '0.51', '1.13', '1.15', '0.40', '0.27', '0.62', '0.70', '0.19', '0.54', '0.59', '0.50', '0.58', '0.52', '0.63', '0.52', '0.75', '0.71'…	0.648209	['1.36', '1.43', '1.48', '1.05', '0.93', '1.18', '0.11', '2.84', '0.18', '2.36', '1.77', '1.16', '1.01', '0.91', '1.02', '0.65', '0.75', '1.28', '2.05', '1.76', '1.85', '1.02', '0.86', '0.64', '1.04', '1.02', '0.76', '0.79', '0.65', '2.81', '1.62', '1.85', '2.04', '0.80', '0.85', '0.79', '1.44', '1.38', '1.55', '1.70', '1.78', '1.99', '1.50', '1.13', '1.56', '0.74', '1.09', '0.96', '1.96', '2.09'…	1.10829
sp|A7ZVC6|PYRI_ECO24	A7ZVC6	Aspartate carbamoyltransferase regulatory chain OS=Escherichia coli O139:H28 (strain E24377A / ETEC) GN=pyrI PE=3 SV=1	pyrI	0.979987	['0.85', '1.90', '0.72', '1.52', '1.07', '1.11', '0.46', '0.42', '0.45', '0.60', '0.55', '0.56', '0.54', '0.58', '0.57', '0.70', '0.73', '0.67', '0.65', '0.68', '0.68', '0.55', '0.57', '0.77', '1.03', '1.13', '0.97', '0.78', '0.75', '0.86', '0.98', '0.62', '0.40', '0.87', '0.91', '0.93']	0.735571	['0.64', '0.86', '0.69', '0.80', '0.66', '1.30', '1.32', '1.34', '1.21', '0.97', '0.83', '0.93', '0.80', '0.88', '1.03', '0.84', '0.84', '0.83', '1.12', '1.14', '1.13', '1.27', '0.90', '1.06', '0.79', '0.79', '0.79', '0.85', '1.18', '1.84', '0.90', '0.89', '0.91', '0.69', '0.90', '1.70', '0.24', '0.37', '19.38', '1.08', '1.17', '0.47', '0.72', '0.74', '0.89']	0.951006	['2.31', '1.36', '1.09', '0.89', '1.15', '0.75', '2.59', '2.69', '2.70', '1.05', '1.11', '0.95', '1.31', '1.01', '1.04', '0.57', '0.61', '0.65', '0.73', '0.56', '0.37', '0.93', '0.88', '0.95', '0.70', '0.91', '0.74', '1.75', '0.68', '2.15', '0.52', '0.98', '0.77', '0.63', '0.73', '0.66']	0.966439	['2.46', '1.48', '1.75', '1.75', '1.46', '1.52', '0.48', '1.64', '1.42', '1.48', '1.81', '1.65', '1.61', '0.85', '0.81', '2.36', '1.32', '0.91', '1.50', '1.48', '1.50', '1.38', '1.26', '0.79', '1.96', '2.01', '2.10', '1.60', '0.80', '0.94', '1.49', '1.28', '1.47', '0.90', '1.68', '1.53', '1.34', '0.89', '1.40', '1.38', '1.30', '1.35']	1.36426
sp|P64554|QUEE_ECOLI	P64554	7-carboxy-7-deazaguanine synthase OS=Escherichia coli (strain K12) GN=queE PE=1 SV=1	queE	0.748479	['0.49', '0.73', '0.59', '0.59', '0.53', '0.97', '0.46', '0.60', '0.91']	0.63367	['0.94', '0.89', '2.05', '0.67', '0.56', '0.72', '0.48', '0.66', '0.62', '0.95', '1.10', '0.83', '0.47', '0.77', '0.56', '1.64', '1.34', '0.89', '1.39', '1.83', '0.44', '0.99', '1.12', '1.20']	0.880276	['0.69', '0.50', '0.78', '0.54', '1.96', '0.36', '0.55', '0.78', '0.79', '0.64', '0.57', '0.96', '1.90', '9.24', '0.70', '0.22', '0.31', '0.25', '0.11', '0.31', '0.33']	0.611054	['1.04', '1.40', '1.65', '0.57', '1.00', '0.56', '1.01', '0.58', '0.71', '2.33', '0.45', '0.59', '0.64', '1.00', '2.25']	0.920784
sp|P0AD51|RAIA_ECO57	P0AD51	Ribosome-associated inhibitor A OS=Escherichia coli O157:H7 GN=raiA PE=3 SV=2	raiA	0.872936	['0.39', '0.59', '0.52', '0.28', '0.34', '0.34', '0.53', '0.34', '0.33', '0.68', '0.20', '0.28', '0.30', '0.34', '1.13', '0.33', '0.26', '0.38', '0.78', '0.02', '0.07', '0.57', '0.66', '0.69', '0.63', '1.05', '0.64', '2.03', '1.72', '1.12']	0.436089	['0.83', '0.83', '1.05', '1.19', '1.49', '1.43', '1.13', '1.08', '1.10', '0.47', '0.45', '0.55', '0.61', '0.66', '0.73', '0.81', '0.91', '0.91', '0.81', '1.24', '2.08', '0.65', '2.40', '1.47', '0.80', '0.84', '0.84', '0.84', '0.79', '0.80', '0.43', '0.71', '0.81', '1.34', '3.61', '2.91', '1.84', '0.73', '1.84', '1.18', '0.97', '1.02', '0.76', '1.14', '1.21', '0.65', '0.57', '0.58', '0.85', '0.74'…	1.09592	['2.64', '2.77', '2.24', '0.88', '1.31', '0.32', '1.17', '1.22', '0.18', '1.54', '2.70', '1.94', '2.61', '1.78', '1.33', '1.64', '1.66', '1.45', '2.13', '0.99', '2.28', '0.85', '1.62', '0.98', '1.03', '1.12', '1.15', '1.06', '1.38', '1.55', '1.50', '0.98', '1.30', '1.02', '1.04', '1.07', '1.34', '0.94', '1.49', '1.97', '0.99', '0.78', '2.30', '2.34', '1.96', '0.33', '0.22', '0.81', '1.11', '1.03'…	1.26182	['0.64', '0.85', '1.11', '0.97', '1.12', '1.05', '0.72', '0.58', '0.72', '1.01', '0.76', '0.61', '1.28', '1.12', '0.98', '1.07', '1.14', '1.12', '1.62', '1.09', '1.04', '0.91', '2.21', '2.29', '1.04', '2.13', '1.32', '0.76', '1.04', '0.96', '2.16', '1.03', '1.77', '0.83', '1.34', '1.20', '0.27', '0.25', '0.36', '1.19', '0.87', '0.97', '0.74', '0.75', '0.71']	0.962899
sp|B7UJ62|RBFA_ECO27	B7UJ62	Ribosome-binding factor A OS=Escherichia coli O127:H6 (strain E2348/69 / EPEC) GN=rbfA PE=3 SV=1	rbfA	0.889397	['0.57', '0.49', '0.71', '0.43', '0.48', '0.65', '0.56', '0.63', '0.75', '0.42', '0.14', '0.48', '0.63', '1.32', '1.04', '0.63', '0.75', '1.42', '0.54', '0.47', '0.55', '0.68', '0.60', '0.51', '0.31', '0.48', '0.25']	0.555147	['1.17', '1.26', '1.81', '1.26', '1.17', '0.69', '0.44', '0.80', '1.29', '1.49', '1.46', '1.06', '1.08', '1.38', '1.06', '0.82', '1.97', '0.80', '0.80', '0.85', '1.05', '5.51', '6.38', '6.14', '4.77', '5.09', '2.65', '1.02', '1.00', '0.94', '0.29', '0.18', '0.65', '0.91', '0.79', '0.21']	1.17005	['0.86', '0.82', '1.05', '0.93', '0.90', '0.26', '0.18', '0.60', '2.11', '1.01', '1.26', '1.19', '0.78', '0.42', '0.85', '0.97', '1.03', '1.09', '0.36', '0.43', '0.37', '0.50', '0.51', '0.57', '0.55', '1.02', '1.18', '1.05', '1.03', '1.00', '0.85', '1.14', '0.75', '0.49', '0.37', '4.05']	0.761183	['1.03', '1.72', '1.02', '1.45', '1.51', '0.53', '0.85', '2.10', '1.37', '1.68', '1.46', '1.73', '0.84', '1.02', '0.99', '1.19', '1.02', '1.70', '0.88', '0.96', '1.79', '1.29', '1.10', '1.09', '1.15', '4.86', '1.17']	1.26555
sp|P69409|RCSB_ECO57	P69409	Capsular synthesis regulator component B OS=Escherichia coli O157:H7 GN=rcsB PE=3 SV=1	rcsB	0.639244	['1.19', '0.16', '0.19', '0.67', '0.51', '0.54']	0.436684	['0.72', '1.16', '0.98', '0.56', '0.60', '0.49', '0.52', '0.38', '0.39', '1.21', '1.15', '0.84']	0.69253	['0.93', '0.59', '0.34', '0.31', '0.45', '0.46', '0.69', '0.62', '0.26', '0.73', '0.63', '0.68', '0.68', '0.62', '0.43', '0.47', '0.30', '0.34', '0.64', '0.65', '0.58']	0.515252	['1.29', '0.85', '1.35', '0.31', '0.56', '0.79', '0.53', '1.00', '2.74', '0.79', '0.92', '0.90', '2.77', '4.28', '5.66', '0.53', '0.97', '0.78', '1.55', '1.31', '2.18', '0.95', '0.88', '0.84', '0.89', '0.78', '0.58']	1.07162
sp|P52061|RDGB_ECOLI	P52061	dITP/XTP pyrophosphatase OS=Escherichia coli (strain K12) GN=rdgB PE=1 SV=1	rdgB	0.784666	['0.74', '0.78', '0.61', '0.61', '0.63', '0.79', '0.62', '0.62', '0.42', '0.53', '0.48', '0.61']	0.611755	['1.14', '1.05', '0.62', '1.59', '1.68', '1.27', '1.39', '1.71', '0.93']	1.20998	['0.18', '0.40', '0.79', '0.34', '0.24', '0.26', '0.45', '0.38', '0.61', '0.69', '0.57', '0.51']	0.414101	['1.72', '1.69', '1.56', '1.13', '0.78', '0.82', '1.20', '1.61', '1.65', '1.06', '1.24', '0.94']	1.23673
sp|B7UJL7|RDGC_ECO27	B7UJL7	Recombination-associated protein RdgC OS=Escherichia coli O127:H6 (strain E2348/69 / EPEC) GN=rdgC PE=3 SV=1	rdgC	0.633704	['0.48', '0.63', '0.76', '0.93', '2.12', '0.82']	0.845802	['0.35', '0.46', '0.52', '0.16', '0.31', '0.16', '0.23', '0.25', '0.08', '0.23', '0.71', '0.29', '1.00', '0.91', '0.35']	0.324818	['0.81', '0.82', '0.76', '0.74', '0.62', '0.61', '0.82', '0.59', '0.91', '0.71', '1.05', '1.93', '0.80', '0.50', '0.69', '0.60', '0.45', '0.32']	0.710958	['0.58', '0.69', '0.80', '2.36', '1.98', '2.84', '0.54', '0.58', '0.55', '0.73', '1.10', '0.69', '0.63', '0.63', '0.48', '1.06', '0.44', '0.89']	0.825647
sp|A7ZQC8|RECA_ECO24	A7ZQC8	Protein RecA OS=Escherichia coli O139:H28 (strain E24377A / ETEC) GN=recA PE=3 SV=1	recA	0.831181	['0.53', '0.56', '0.45', '1.00', '0.96', '1.03', '0.36', '1.40', '0.30', '0.58', '0.83', '0.90', '0.95', '0.64', '0.72', '1.17', '0.84', '0.87', '1.23', '1.81', '1.23', '0.23', '0.32', '0.24', '0.65', '0.24', '0.62', '1.87', '0.87', '0.98', '1.89', '0.74', '0.91', '1.24', '1.15', '1.27', '1.15', '0.30', '0.39']	0.738967	['0.60', '0.96', '0.98', '0.66', '0.62', '0.86', '0.83', '1.17', '0.79', '0.82', '0.97', '2.73', '0.83', '1.43', '1.17', '2.30', '2.06', '3.86', '0.68', '1.82', '0.70', '1.83', '2.68', '5.24', '0.61', '0.96', '0.89', '0.36', '0.78', '0.58', '1.17', '1.09', '1.52', '0.69', '0.61', '0.71', '1.09', '1.18', '1.18', '2.00', '1.69', '1.87', '0.73', '0.77', '0.77', '1.05', '0.81', '1.15', '0.80', '0.69'…	1.06111	['0.73', '0.83', '1.00', '0.70', '0.73', '0.85', '0.38', '0.55', '0.86', '0.96', '0.90', '0.89', '0.76', '0.86', '0.80', '0.45', '0.51', '0.34', '0.68', '0.12', '0.35', '0.60', '0.46', '0.33', '0.72', '0.63', '0.92', '0.64', '1.15', '0.80', '1.00', '1.05', '1.13', '0.84', '0.87', '0.74', '1.55', '0.87', '0.92', '0.88', '0.74', '0.77', '0.51', '0.25', '0.59', '1.21', '0.75', '0.53']	0.68639	['1.05', '1.01', '1.20', '0.99', '0.95', '0.93', '0.86', '0.80', '0.86', '1.04', '1.41', '1.18', '1.10', '1.10', '0.77', '1.32', '0.92', '1.13', '0.83', '0.80', '0.69', '1.00', '0.67', '0.95', '0.82', '0.84', '0.78', '0.61', '0.51', '0.64', '0.73', '0.58', '0.92', '1.04', '0.84', '0.90', '0.72', '0.52', '0.78', '1.45', '1.53', '1.25', '2.03', '2.36', '1.13', '0.31', '0.19', '1.13', '1.09', '0.46'…	0.886796
sp|P27833|RFFA_ECOLI	P27833	Lipopolysaccharide biosynthesis protein RffA OS=Escherichia coli (strain K12) GN=rffA PE=3 SV=2	rffA	1.03938			['0.64', '0.93', '1.59', '1.42', '1.19', '0.99', '0.58', '1.18', '0.81']	0.987062	['0.69', '1.14', '0.67', '0.97', '2.16', '0.84', '0.82', '0.32', '1.22']	0.873246	['0.79', '0.86', '0.84', '1.91', '1.45', '1.03', '2.09', '1.25', '2.54']	1.30271
sp|P0AG31|RHO_ECOL6	P0AG31	Transcription termination factor Rho OS=Escherichia coli O6:H1 (strain CFT073 / ATCC 700928 / UPEC) GN=rho PE=3 SV=1	rho	0.824341	['0.76', '0.59', '0.27', '1.02', '0.94', '1.21', '0.79', '0.82', '1.42', '0.49', '0.47', '0.50', '0.34', '0.31', '0.10', '0.47', '0.42', '0.60', '0.56', '0.55', '0.58', '0.79', '0.83', '0.89', '1.15', '0.83', '0.74', '0.58', '0.55', '0.58', '0.70', '0.58', '0.42', '0.48', '0.58', '0.33', '0.92', '0.87', '0.94', '0.85', '0.78', '2.58', '0.46', '0.31', '0.12', '0.45', '0.39', '1.44', '0.29', '0.46'…	0.583983	['0.72', '0.66', '1.29', '2.35', '2.32', '2.22', '1.99', '1.78', '1.65', '1.00', '0.65', '1.11', '0.50', '0.42', '0.40', '0.83', '0.59', '0.62', '0.56', '0.75', '0.75', '0.65', '0.63', '0.47', '0.94', '1.84', '1.40', '1.01', '0.67', '1.07', '0.66', '0.83', '0.73', '1.73', '2.10', '28.26', '1.34', '1.61', '0.67', '0.57', '0.67', '0.74', '0.79', '0.89', '0.14', '0.60', '0.51', '1.08', '0.85', '1.00…	0.928515	['0.44', '0.65', '0.78', '0.38', '0.34', '0.58', '0.47', '0.50', '0.53', '0.27', '0.31', '0.40', '0.55', '0.60', '0.58', '0.50', '0.52', '1.23', '1.01', '0.63', '48.69', '0.46', '0.43', '1.84', '1.05', '0.58', '0.44', '0.74', '0.84', '0.79', '0.65', '0.82', '0.77', '0.54', '0.55', '0.44', '0.57', '0.70', '0.58', '2.66', '1.98', '99.60', '0.45', '0.36', '0.40', '0.50', '0.49', '0.44', '0.53', '0.6…	0.693091	['0.97', '1.93', '5.47', '1.51', '1.45', '1.24', '0.94', '0.91', '0.87', '0.95', '0.94', '0.61', '1.17', '1.18', '1.16', '1.11', '1.05', '0.68', '1.54', '1.40', '1.58', '1.76', '1.13', '0.78', '1.42', '1.39', '1.25', '1.18', '0.50', '0.52', '2.33', '2.57', '2.33', '1.12', '1.14', '0.59', '0.71', '0.61', '0.96', '1.54', '1.34', '1.38', '1.00', '1.03', '1.24', '1.45', '1.36', '0.94', '5.95', '3.58'…	1.22871
sp|A7ZR23|RPIA_ECO24	A7ZR23	Ribose-5-phosphate isomerase A OS=Escherichia coli O139:H28 (strain E24377A / ETEC) GN=rpiA PE=3 SV=1	rpiA	0.787283	['0.61', '0.61', '0.59', '0.24', '0.24', '0.55', '1.54', '1.33', '4.54', '0.17', '0.19', '0.28', '0.77', '0.73', '0.86', '0.55', '0.56', '0.56', '0.47', '0.46', '0.46']	0.558711	['6.27', '5.44', '6.03', '5.78', '5.66', '5.51', '1.00', '1.64', '2.99', '2.25', '4.92', '2.22', '0.73', '0.72', '0.73', '0.43', '0.43', '0.34', '1.31', '5.22', '1.47', '1.12', '0.93', '0.77', '0.31', '0.50', '0.60', '0.75', '0.81', '0.76', '0.57', '0.60', '0.57', '0.73', '0.69', '0.80', '0.50', '0.71', '0.54', '0.64', '0.63', '0.64']	1.12602	['0.16', '0.17', '0.17', '0.21', '0.22', '0.23', '0.45', '0.26', '0.26', '0.60', '0.59', '0.52', '0.51', '0.50', '0.52', '0.52', '0.56', '0.73', '0.49', '0.48', '0.66', '1.60', '1.22', '1.37', '0.50', '0.51', '0.54', '2.29', '2.25', '0.70', '0.75', '0.37', '0.54', '0.51', '0.51', '0.57', '0.51', '0.50', '0.55']	0.513391	['1.13', '1.14', '1.10', '0.95', '1.05', '0.98', '1.20', '1.10', '0.89', '1.06', '1.05', '1.05', '0.99', '0.97', '1.34', '0.81', '0.93', '0.64', '2.04', '2.47', '1.37', '0.98', '1.06', '0.96', '1.04', '1.47', '1.21', '0.87', '0.73', '0.87', '8.92', '5.13', '2.99', '0.82', '0.76', '0.72']	1.18943
sp|B7UPD9|RL1_ECO27	B7UPD9	50S ribosomal protein L1 OS=Escherichia coli O127:H6 (strain E2348/69 / EPEC) GN=rplA PE=3 SV=1	rplA	0.727721	['0.71', '0.66', '0.68', '0.21', '0.13', '0.24', '1.35', '1.37', '1.31', '1.07', '1.12', '0.03', '0.57', '0.58', '0.57', '0.58', '0.58', '0.59', '0.97', '0.62', '0.54', '0.53', '0.60', '0.58', '0.79', '0.57', '0.77', '0.32', '0.21', '0.28', '0.50', '0.37', '0.35', '0.61', '0.67', '0.61', '0.67', '0.66', '0.68', '0.66', '2.21', '0.39', '0.38', '0.38', '0.75', '0.47', '0.62', '0.19', '0.54', '0.97'…	0.566282	['1.27', '1.26', '1.31', '2.01', '0.60', '0.48', '0.79', '0.84', '1.19', '0.48', '0.50', '0.49', '0.64', '0.58', '3.46', '1.01', '0.97', '0.98', '0.71', '0.71', '0.91', '1.21', '0.73', '1.45', '0.39', '0.62', '1.23', '1.01', '0.68', '0.82', '1.78', '1.07', '2.51', '0.67', '0.86', '0.60', '0.86', '0.98', '0.98', '0.50', '0.58', '0.54', '0.68', '0.67', '0.67', '0.76', '1.54', '0.81', '0.65', '0.64'…	0.886259	['0.34', '0.32', '0.31', '0.34', '0.36', '1.62', '0.55', '0.55', '0.55', '0.62', '0.72', '1.12', '0.45', '0.45', '0.45', '0.56', '0.56', '0.58', '0.58', '0.77', '0.40', '0.28', '0.36', '0.50', '0.51', '0.52', '0.48', '0.53', '0.49', '0.49', '0.52', '0.33', '0.39', '0.68', '1.64', '1.86', '0.59', '0.62', '0.66', '0.54', '0.56', '0.55', '0.52', '0.79', '0.49', '0.67', '0.65', '0.81', '0.67', '0.71'…	0.511523	['1.20', '1.21', '1.26', '0.63', '0.40', '1.18', '0.28', '0.26', '0.22', '0.83', '0.81', '0.43', '0.59', '1.27', '1.20', '4.94', '1.76', '2.74', '1.82', '1.94', '1.76', '1.42', '1.38', '1.40', '1.41', '1.34', '1.50', '1.30', '1.26', '1.25', '1.26', '1.20', '1.15', '1.39', '1.95', '1.14', '0.82', '1.02', '1.75', '1.28', '1.27', '1.23', '0.89', '1.25', '0.92', '0.76', '1.17', '0.77', '1.46', '1.32'…	1.09245
sp|B7UK43|RL4_ECO27	B7UK43	50S ribosomal protein L4 OS=Escherichia coli O127:H6 (strain E2348/69 / EPEC) GN=rplD PE=3 SV=1	rplD	0.855898	['0.60', '0.63', '0.79', '0.80', '0.79', '0.76', '0.61', '0.91', '0.51', '0.57', '0.96', '0.63', '0.95', '0.76', '0.77', '0.45', '1.45', '0.66', '2.96', '2.56', '5.16', '0.55', '0.62', '0.59', '0.61', '0.62', '0.62', '0.58', '0.59', '0.58', '1.65', '1.28', '1.82', '0.79', '0.64', '0.72', '1.48', '1.42', '1.87']	0.879593	['0.90', '0.91', '0.87', '0.97', '0.88', '0.82', '2.28', '1.75', '2.65', '1.58', '0.66', '1.03', '0.99', '1.34', '0.82', '0.99', '0.99', '0.92', '2.39', '1.18', '1.19', '0.70', '0.69', '0.68', '0.65', '0.66', '0.65', '0.72', '0.72', '0.74', '0.95', '0.95', '0.98', '0.91', '0.87', '0.87', '2.91', '2.59', '3.10', '0.55', '0.58', '0.63', '2.03', '1.21', '0.57']	1.02154	['0.59', '0.58', '0.54', '0.73', '0.62', '0.52', '1.10', '1.06', '0.89', '0.39', '0.45', '0.40', '0.46', '0.50', '0.49', '0.54', '0.35', '0.45', '0.52', '0.53', '0.54', '0.49', '0.51', '0.51', '0.55', '0.54', '0.53', '0.44', '0.39', '0.42', '0.67', '0.66', '0.64']	0.542857	['1.22', '1.16', '1.50', '1.25', '1.22', '1.38', '0.61', '0.57', '0.68', '0.83', '0.91', '1.23', '1.25', '1.64', '1.18', '0.93', '1.32', '1.41', '0.72', '1.05', '0.58', '1.50', '1.51', '1.59', '1.48', '1.50', '1.66', '1.32', '1.36', '1.35', '0.29', '0.42', '0.70', '1.30', '1.29', '1.27', '1.32', '1.32', '1.32', '1.02', '1.09', '0.90', '1.57', '1.53', '1.64', '0.76', '1.86', '0.66', '2.06', '0.76'…	1.10019
sp|A7ZSJ7|RL5_ECO24	A7ZSJ7	50S ribosomal protein L5 OS=Escherichia coli O139:H28 (strain E24377A / ETEC) GN=rplE PE=3 SV=1	rplE	1.00506	['1.91', '1.06', '1.70', '0.64', '1.29', '2.00', '0.66', '0.66', '0.53', '0.60', '0.75', '0.81', '1.49', '1.49', '5.57', '1.23', '0.94', '1.96', '0.76', '2.45', '2.18', '0.57', '0.98', '0.98', '0.46', '0.83', '0.36', '0.82', '0.53', '0.93', '0.47', '0.49', '0.62', '0.68', '0.68', '0.70', '0.72', '0.85', '0.63', '2.58', '1.02', '1.70', '1.14', '0.99', '0.93', '0.45', '0.53', '0.53', '1.03', '0.98'…	0.819239	['1.48', '1.54', '1.67', '0.86', '0.75', '0.96', '1.27', '1.27', '1.27', '0.81', '1.09', '1.13', '1.21', '1.93', '1.64', '2.96', '2.00', '3.02', '0.80', '0.53', '0.48', '6.38', '5.23', '4.59', '1.24', '1.45', '0.99', '1.01', '1.04', '0.97', '1.47', '0.73', '0.49', '1.05', '1.09', '1.26', '1.14', '1.10', '1.10', '1.01', '1.23', '0.97', '0.86', '0.50', '0.74', '1.08', '1.01', '1.12', '0.59', '0.61'…	1.12165	['0.92', '1.03', '1.80', '2.16', '2.26', '1.95', '1.18', '1.30', '1.53', '0.54', '0.56', '0.58', '0.57', '0.61', '0.61', '0.86', '0.76', '0.62', '0.87', '1.02', '0.77', '1.24', '0.44', '0.99', '1.30', '1.24', '1.68', '1.05', '0.98', '1.64', '0.55', '0.55', '0.65', '0.92', '0.79', '0.75', '0.73', '0.72', '0.65', '0.62', '0.67', '0.65', '0.74', '0.80', '0.71', '1.31', '0.96', '0.45', '0.75', '0.45'…	0.836601	['1.78', '0.54', '2.23', '1.51', '1.28', '1.56', '0.39', '1.80', '1.41', '1.44', '1.47', '1.41', '1.51', '0.80', '1.57', '0.68', '3.87', '2.04', '0.97', '1.50', '1.54', '1.09', '1.11', '0.99', '1.61', '1.53', '1.51', '1.54', '1.44', '1.51', '1.55', '1.55', '1.56', '2.16', '1.94', '1.02', '0.71', '2.06', '0.93', '1.36', '1.05', '0.75', '2.35', '2.29', '1.81', '2.40', '0.99', '1.18', '1.46', '1.35'…	1.32735
sp|A7ZSJ4|RL6_ECO24	A7ZSJ4	50S ribosomal protein L6 OS=Escherichia coli O139:H28 (strain E24377A / ETEC) GN=rplF PE=3 SV=1	rplF	0.958933	['0.46', '0.46', '0.46', '2.19', '1.97', '1.69', '0.78', '0.82', '0.83', '0.55', '0.55', '0.73', '0.59', '0.56', '0.52', '0.40', '0.42', '0.43', '0.52', '0.39', '0.57', '0.63', '0.62', '0.56', '0.54', '0.59', '0.66', '0.76', '1.26', '12.26', '1.04', '0.84', '0.88', '2.21', '0.63', '0.70', '0.49', '0.53', '0.41', '0.30', '0.53', '60.62', '0.59', '0.67', '0.65', '1.41', '0.88', '1.49', '0.86', '0.4…	0.887719	['0.85', '0.96', '1.02', '0.65', '0.67', '0.67', '0.54', '0.55', '0.55', '1.02', '1.00', '0.95', '0.74', '0.77', '0.79', '1.30', '1.29', '1.29', '1.27', '1.43', '1.28', '1.47', '1.52', '1.49', '0.89', '0.88', '0.83', '1.82', '1.55', '2.48', '3.04', '2.08', '7.78', '3.71', '1.50', '1.58', '1.02', '1.00', '1.01', '1.27', '1.39', '1.28', '0.72', '0.92', '0.73', '1.41', '1.39', '1.35', '1.19', '1.39'…	1.15617	['0.83', '0.89', '0.94', '0.69', '0.66', '0.70', '1.17', '1.22', '1.19', '0.86', '0.85', '0.86', '1.05', '0.99', '0.99', '0.89', '0.65', '0.62', '0.52', '0.56', '0.58', '0.38', '0.67', '0.63', '0.53', '0.54', '0.53', '0.71', '0.65', '0.71', '0.64', '0.93', '0.85', '0.45', '1.25', '1.28', '0.21', '1.12', '1.16', '0.85', '0.93', '0.66', '0.89', '0.89', '0.91', '0.72', '0.71', '1.10', '0.44', '0.46'…	0.761861	['1.51', '1.49', '1.44', '0.81', '1.43', '0.70', '1.54', '0.85', '1.45', '0.48', '0.59', '0.82', '0.99', '0.80', '1.08', '1.28', '1.29', '1.26', '1.26', '1.24', '1.19', '5.99', '4.15', '2.05', '1.07', '1.10', '1.04', '0.91', '0.88', '0.87', '2.81', '1.24', '1.39', '0.41', '1.49', '0.60', '1.14', '0.97', '0.95', '0.88', '1.70', '1.15', '1.07', '1.30', '1.14', '0.68', '1.51', '0.88', '0.93', '0.94'…	1.08138
sp|A7ZV74|RL9_ECO24	A7ZV74	50S ribosomal protein L9 OS=Escherichia coli O139:H28 (strain E24377A / ETEC) GN=rplI PE=3 SV=1	rplI	0.878306	['0.46', '0.44', '0.43', '0.60', '1.00', '0.51', '0.37', '0.38', '0.38', '0.34', '0.48', '0.36', '0.74', '0.48', '0.44', '0.39', '0.37', '0.52', '0.59', '0.61', '0.64', '0.48', '0.48', '0.47', '0.51', '0.49', '0.48', '0.55', '0.66', '0.34', '0.67', '0.67', '0.23', '0.26', '0.05', '0.04', '0.38', '0.35', '0.33', '0.30', '0.29', '0.26', '0.94', '1.59', '1.19', '0.51', '0.53', '0.51']	0.43472	['1.09', '1.06', '1.04', '1.07', '1.67', '0.70', '1.29', '2.22', '1.67', '1.03', '1.03', '1.03', '0.98', '1.01', '0.97', '1.04', '1.05', '1.02', '0.79', '1.29', '0.59', '1.08', '1.08', '1.15', '1.07', '1.05', '1.08', '1.12', '1.13', '1.13', '1.15', '1.10', '0.93', '1.10', '0.83', '0.64', '1.12', '1.58', '0.56', '1.81', '0.75', '0.56', '1.25', '1.27', '0.58', '1.34', '1.32', '1.31', '1.56', '1.32'…	1.04789	['0.75', '0.78', '0.82', '0.91', '0.46', '0.57', '0.78', '1.73', '2.27', '1.01', '0.93', '0.99', '1.00', '1.08', '1.10', '1.36', '1.41', '1.43', '0.50', '0.72', '0.42', '1.04', '1.04', '1.01', '0.90', '0.91', '0.90', '0.72', '0.72', '0.67', '0.74', '0.78', '0.76', '0.80', '0.87', '1.22', '0.83', '0.84', '0.96', '1.10', '1.13', '1.03', '1.62', '1.62', '1.62', '1.75', '1.77', '1.69', '1.86', '3.93'…	1.04612	['3.37', '4.23', '0.83', '1.12', '1.26', '0.74', '1.96', '2.78', '2.00', '1.46', '1.45', '1.43', '1.31', '1.34', '1.29', '3.25', '3.62', '3.47', '1.53', '1.38', '1.44', '1.09', '1.11', '0.88', '1.29', '1.29', '1.21', '1.25', '1.05', '1.06', '1.18', '1.17', '0.54', '1.97', '1.12', '1.69', '0.68', '0.66', '0.88', '0.77', '0.91', '0.65', '1.23', '1.25', '1.46', '1.17', '1.18', '1.19', '1.65', '1.77'…	1.24875
sp|B7UPE0|RL10_ECO27	B7UPE0	50S ribosomal protein L10 OS=Escherichia coli O127:H6 (strain E2348/69 / EPEC) GN=rplJ PE=3 SV=1	rplJ	0.771622	['0.38', '0.37', '0.29', '0.47', '0.92', '0.85', '0.71', '0.66', '0.48', '0.96', '0.90', '0.19', '0.63', '0.61', '0.73', '0.60', '0.61', '0.75', '0.50', '0.54', '0.52', '0.55', '0.64', '0.57', '0.33', '0.43', '0.34', '0.49', '0.50', '0.48', '0.23', '0.44', '0.35', '0.56', '0.57', '0.56', '0.67', '0.61', '0.61', '0.65', '0.68', '0.67', '0.58', '0.60', '0.48']	0.533654	['2.63', '2.62', '2.44', '1.75', '0.82', '0.63', '0.82', '0.75', '0.81', '1.75', '1.76', '2.24', '1.98', '2.32', '1.67', '0.77', '0.80', '0.56', '0.42', '0.42', '0.38', '0.84', '0.88', '1.10', '0.53', '0.50', '0.51', '1.18', '0.93', '0.97', '0.67', '0.70', '0.72', '0.39', '0.68', '0.24', '0.88', '0.87', '0.89', '0.73', '0.71', '0.68', '0.79', '0.80', '0.79', '0.91', '0.69', '0.55']	0.865579	['0.58', '0.62', '0.71', '0.99', '0.64', '0.38', '0.77', '0.72', '0.88', '0.93', '0.88', '0.86', '0.65', '0.78', '0.62', '0.75', '0.70', '0.56', '0.79', '0.78', '0.69', '0.85', '0.95', '0.79', '0.56', '0.68', '0.63', '0.71', '0.71', '0.68', '0.71', '0.73', '0.93', '0.62', '0.62', '0.66', '0.99', '0.75', '0.75', '0.61', '0.61', '0.64', '0.62', '0.59', '0.52']	0.704034	['1.02', '1.08', '1.27', '1.35', '1.18', '0.72', '1.20', '1.19', '1.23', '1.00', '0.83', '0.10', '0.91', '0.87', '1.07', '1.33', '1.32', '1.37', '1.05', '1.03', '1.01', '1.01', '1.00', '0.87', '1.17', '1.16', '1.17', '1.18', '1.28', '1.44', '2.26', '1.59', '1.34', '0.99', '1.09', '0.96', '1.17', '1.08', '1.10', '1.46', '1.50', '1.53', '1.15', '1.17', '1.11', '0.80', '1.29', '1.12']	1.09008
sp|A7ZUJ6|RL11_ECO24	A7ZUJ6	50S ribosomal protein L11 OS=Escherichia coli O139:H28 (strain E24377A / ETEC) GN=rplK PE=3 SV=1	rplK	0.857418	['0.52', '0.53', '0.55', '0.49', '0.59', '0.46', '0.49', '0.49', '0.60', '0.38', '0.36', '0.41', '0.40', '0.39', '0.42', '0.46', '0.46', '0.46', '0.49', '0.46', '0.50', '0.60', '0.67', '0.58', '1.28', '1.49', '2.02', '0.43', '0.55', '0.49', '0.52', '0.56', '0.60']	0.545413	['1.67', '1.61', '1.92', '2.16', '1.87', '1.62', '1.00', '1.22', '1.69', '1.02', '1.90', '0.45', '1.68', '1.69', '1.69', '1.49', '1.28', '1.38', '0.92', '0.93', '0.87', '1.09', '1.08', '1.14', '0.68', '0.69', '1.01', '0.77', '0.77', '0.78', '1.10', '1.09', '1.08', '1.12', '0.93', '1.20', '1.37', '1.03', '1.15', '0.47', '1.93', '1.50', '2.34', '1.85', '1.87', '1.01', '0.80', '0.82', '1.15', '1.34'…	1.177	['0.24', '0.31', '0.34', '0.48', '0.44', '0.50', '0.54', '0.54', '0.52', '0.47', '0.50', '0.52', '0.55', '0.61', '0.51', '0.96', '0.95', '0.88', '0.79', '0.80', '0.79', '0.81', '0.82', '0.82', '0.78', '0.81', '0.88', '0.73', '0.81', '0.73', '1.11', '1.58', '1.71', '0.15', '8.35', '5.14', '0.85', '0.94', '0.83', '0.54', '0.48', '0.53', '0.67', '0.56', '0.81']	0.713224	['1.16', '1.47', '1.68', '1.36', '1.33', '1.35', '1.21', '1.10', '1.09', '2.53', '1.88', '1.63', '0.99', '0.98', '0.97', '0.97', '0.94', '0.95', '0.92', '0.88', '0.94', '1.19', '1.07', '1.07', '1.80', '1.06', '1.03', '1.24', '1.05', '1.25', '2.43', '2.10', '1.93', '0.86', '1.17', '1.37', '1.06', '0.61', '0.34']	1.18043
sp|A7ZUK0|RL7_ECO24	A7ZUK0	50S ribosomal protein L7/L12 OS=Escherichia coli O139:H28 (strain E24377A / ETEC) GN=rplL PE=3 SV=1	rplL	0.936864	['0.74', '0.59', '0.81', '0.49', '0.44', '0.98', '0.42', '0.45', '0.47', '0.59', '0.58', '0.62', '1.59', '0.69', '1.05', '0.93', '1.06', '0.22', '0.87', '1.18', '2.43', '0.93', '0.90', '1.61', '0.92', '0.94', '2.84', '0.84', '0.83', '0.85', '2.05', '1.15', '1.30', '0.94', '0.97', '0.95', '0.98', '1.15', '1.03', '0.43', '0.47', '0.47', '0.56', '0.60', '0.53']	0.81231	['1.20', '7.23', '2.10', '0.54', '0.84', '0.59', '0.66', '0.40', '0.48', '6.15', '19.88', '21.92', '0.76', '0.78', '0.49', '0.72', '0.72', '0.74', '0.92', '1.72', '1.40', '0.51', '0.56', '0.94', '3.20', '3.58', '7.82', '1.38', '1.34', '6.49', '1.37', '0.92', '7.10', '0.99', '1.04', '0.88', '0.53', '0.64', '0.91', '0.44', '0.38', '0.44', '0.57', '0.18', '0.31', '1.11', '1.10', '0.98', '0.59', '0.5…	1.10618	['1.31', '0.79', '0.79', '1.32', '0.83', '0.69', '2.16', '4.02', '0.86', '0.60', '0.60', '1.23', '0.78', '0.80', '0.67', '0.81', '0.61', '0.59', '0.52', '0.69', '0.26', '0.78', '0.61', '0.55', '0.46', '0.53', '0.61', '0.57', '0.51', '0.79', '0.52', '0.54', '0.56', '0.71', '0.66', '0.53', '0.51', '0.52', '0.48', '0.49', '0.43', '0.36']	0.677493	['0.53', '1.36', '0.45', '0.99', '0.73', '0.65', '0.97', '1.23', '1.34', '0.98', '0.68', '0.37', '0.78', '0.91', '0.65', '1.55', '0.78', '0.67', '0.98', '1.06', '0.98', '1.30', '1.66', '1.11', '2.67', '1.90', '3.12', '0.80', '0.75', '1.04', '1.50', '1.50', '1.34', '1.54', '1.71', '1.50', '1.53', '1.48', '3.13', '2.25', '0.99', '1.55', '0.74', '0.73', '1.16', '1.35', '0.73', '1.18', '0.82', '0.81'…	1.26547
sp|A7ZSJ9|RL14_ECO24	A7ZSJ9	50S ribosomal protein L14 OS=Escherichia coli O139:H28 (strain E24377A / ETEC) GN=rplN PE=3 SV=1	rplN	0.916623	['0.58', '0.53', '0.56', '0.54', '0.64', '0.62', '0.51', '0.74', '0.36', '1.07', '0.71', '0.81', '0.38', '1.01', '0.33', '0.70', '0.85', '0.63', '2.49', '0.64', '1.29', '0.92', '0.76', '0.55', '0.34', '0.34', '0.34', '0.48', '0.47', '0.44', '0.20', '0.19', '0.44', '0.75', '0.77', '1.00']	0.586516	['1.28', '1.27', '1.26', '1.01', '0.97', '0.93', '1.36', '1.29', '1.04', '1.34', '2.09', '1.33', '2.35', '0.67', '0.77', '1.04', '0.91', '0.92', '0.51', '0.91', '1.15', '0.75', '0.76', '0.88', '1.14', '1.33', '1.39', '0.85', '0.89', '1.07', '2.22', '2.43', '4.82', '0.72', '0.72', '0.69', '1.51', '1.49', '1.52', '1.24', '1.24', '1.25', '0.93', '0.99', '0.83', '2.54', '2.30', '3.59', '0.54', '1.31'…	1.1434	['0.83', '0.84', '0.81', '0.88', '0.88', '0.88', '1.29', '0.79', '0.90', '0.69', '0.90', '0.66', '0.90', '0.63', '0.87', '0.92', '0.73', '1.78', '1.19', '0.57', '0.63', '0.48', '0.54', '0.89', '1.07', '1.08', '1.13', '0.91', '1.11', '0.74', '1.27', '1.22', '1.02', '0.79', '0.78', '0.80', '0.77', '0.81', '0.77', '0.83', '0.88', '0.84', '0.84', '1.11', '0.61', '1.72', '1.44', '1.27', '0.63', '1.80'…	0.866851	['1.48', '1.53', '1.53', '1.33', '1.45', '1.58', '2.10', '0.99', '0.75', '1.32', '0.96', '1.31', '0.74', '0.67', '0.91', '1.25', '1.22', '1.21', '1.14', '1.02', '1.23', '1.27', '1.42', '3.21', '0.50', '0.66', '0.56', '1.41', '1.50', '1.41', '1.45', '1.44', '1.41', '1.54', '1.50', '1.49', '0.88', '1.29', '1.26', '1.56', '1.41', '1.42', '0.98', '1.75', '1.64', '0.55', '0.84', '0.98', '1.54', '1.54'…	1.21434
sp|B7UK25|RL15_ECO27	B7UK25	50S ribosomal protein L15 OS=Escherichia coli O127:H6 (strain E2348/69 / EPEC) GN=rplO PE=3 SV=1	rplO	0.967877	['0.69', '0.69', '0.70', '0.22', '0.54', '0.86', '0.36', '0.52', '0.45', '0.97', '0.33', '0.33', '0.95', '0.79', '0.69', '0.76', '0.72', '0.78', '0.79', '0.73', '0.66', '0.92', '0.94', '0.96']	0.639077	['0.74', '0.71', '1.41', '0.80', '0.80', '0.80', '2.57', '1.73', '3.88', '2.44', '6.41', '13.91', '0.73', '0.82', '0.94', '1.20', '1.32', '1.34', '1.60', '1.48', '1.22', '1.03', '1.06', '1.05', '1.00', '0.98', '0.63', '0.54', '1.00', '0.94']	1.28318	['0.19', '0.33', '0.41', '0.89', '0.87', '0.90', '0.87', '0.90', '0.53', '0.98', '4.11', '0.52', '0.79', '0.96', '0.76', '0.70', '0.42', '0.53', '0.69', '9.56', '14.49', '0.51', '0.52', '0.51', '0.67', '0.64', '0.56', '0.56', '0.52', '0.62', '0.70', '0.73', '0.73']	0.782704	['2.22', '2.10', '2.22', '1.30', '1.99', '1.39', '1.79', '0.84', '1.37', '2.56', '2.39', '1.39', '2.05', '1.30', '0.84', '1.50', '1.45', '1.45', '0.88', '1.17', '0.96', '1.39', '1.00', '1.43', '1.33', '1.32', '1.16', '0.88', '0.86', '0.87']	1.36723
sp|A7ZSK2|RL16_ECO24	A7ZSK2	50S ribosomal protein L16 OS=Escherichia coli O139:H28 (strain E24377A / ETEC) GN=rplP PE=3 SV=1	rplP	0.881656	['0.74', '0.62', '0.57', '0.74', '0.60', '1.09', '0.63', '0.34', '0.83', '0.70', '0.74', '0.78', '0.60', '0.63', '0.70', '0.36', '0.59', '0.60', '0.54', '0.53', '0.56', '0.54', '1.22', '0.61', '0.88', '0.98', '0.87']	0.663282	['1.82', '1.27', '1.19', '1.91', '0.94', '1.53', '1.27', '0.55', '0.67', '0.47', '1.50', '0.70', '1.02', '1.05', '1.06', '0.80', '1.09', '0.74', '0.97', '0.95', '1.01', '0.64', '0.58', '0.69', '2.70', '1.85', '2.26']	1.04775	['1.71', '1.69', '1.58', '2.06', '1.17', '2.11', '0.33', '0.32', '0.10', '0.32', '7.61', '0.30', '0.79', '0.74', '0.85', '0.80', '0.77', '0.75', '0.70', '0.70', '0.67', '0.86', '0.76', '0.71', '1.08', '0.97', '1.51']	0.84217	['0.91', '0.89', '0.88', '0.97', '0.92', '1.08', '0.62', '1.09', '1.00', '0.72', '1.00', '0.91', '1.18', '0.66', '1.49', '1.51', '1.13', '0.93', '1.52', '1.23', '1.14', '1.49', '0.59', '0.58', '0.90', '1.17', '2.50', '1.03', '1.12', '1.41']	1.03239
sp|A7ZSI3|RL17_ECO24	A7ZSI3	50S ribosomal protein L17 OS=Escherichia coli O139:H28 (strain E24377A / ETEC) GN=rplQ PE=3 SV=1	rplQ	0.896447	['0.67', '0.63', '0.80', '0.54', '0.56', '1.51', '0.31', '0.40', '0.60', '0.40', '0.45', '1.21', '14.76', '9.13', '2.40', '1.01', '1.34', '0.66', '0.54', '0.61', '0.53', '0.51', '0.55', '0.40', '1.45', '0.43', '0.41', '1.54', '0.90', '1.20', '0.39', '0.05', '0.43']	0.741744	['0.63', '0.65', '0.72', '5.37', '1.55', '1.75', '1.08', '1.07', '1.04', '0.97', '1.07', '1.04', '0.84', '0.83', '0.90', '1.38', '1.25', '1.51', '1.60', '1.63', '1.54', '1.44', '1.48', '0.99', '0.94', '0.91', '0.91', '0.08', '0.29', '0.19', '2.79', '2.14', '0.67', '1.54', '0.74', '1.15']	1.00909	['0.63', '0.63', '0.64', '0.87', '0.94', '0.92', '0.96', '0.99', '0.91', '1.04', '0.96', '0.96', '0.48', '0.47', '2.51', '0.67', '0.68', '0.69', '0.99', '0.91', '1.00', '0.42', '0.36', '0.26', '0.28', '0.08', '0.30', '0.38', '0.42', '0.43']	0.613056	['1.59', '1.63', '1.21', '3.38', '1.78', '0.98', '3.12', '3.19', '1.94', '2.57', '1.95', '1.84', '0.92', '0.98', '0.99', '0.95', '0.97', '0.92', '0.89', '1.75', '2.54', '1.41', '0.78', '1.24', '2.85', '0.50', '0.54']	1.40739
sp|B7UK28|RL18_ECO27	B7UK28	50S ribosomal protein L18 OS=Escherichia coli O127:H6 (strain E2348/69 / EPEC) GN=rplR PE=3 SV=1	rplR	1.09287	['0.88', '1.12', '0.77', '0.70', '0.78', '0.66', '0.10', '0.77', '0.90', '0.88', '0.41', '1.40', '1.27', '1.29', '1.23']	0.769751	['0.57', '17.79', '24.20', '0.75', '0.75', '0.84', '1.34', '1.44', '0.96', '1.14', '1.21', '1.28', '0.75', '0.82', '1.07', '2.14', '3.30', '1.79', '2.92', '2.98', '0.67', '1.27', '1.28', '1.24', '0.92', '0.95', '1.98', '0.86', '0.86', '0.82']	1.42252	['1.25', '1.85', '2.15', '1.20', '0.72', '1.50', '0.75', '0.74', '0.80', '0.72', '1.59', '1.68', '1.21', '1.12', '1.20', '0.91', '0.86', '0.96']	1.11216	['0.95', '0.91', '0.89', '1.22', '1.56', '1.57', '1.24', '1.19', '1.32', '1.09', '0.86', '1.12', '2.13', '1.85', '1.01', '1.77', '1.57', '1.00', '1.33', '0.97', '0.88', '1.75', '0.54', '0.49', '1.40', '1.48', '1.25']	1.17138
sp|B7UH55|RL19_ECO27	B7UH55	50S ribosomal protein L19 OS=Escherichia coli O127:H6 (strain E2348/69 / EPEC) GN=rplS PE=3 SV=1	rplS	0.94366	['0.67', '1.49', '0.99', '0.36', '0.47', '0.72', '0.53', '0.57', '0.62', '0.67', '0.68', '0.61', '1.13', '0.84', '0.67', '0.55', '0.78', '1.40', '0.51', '0.80', '0.55', '0.60', '0.58', '0.54']	0.680431	['0.60', '1.01', '1.13', '1.43', '1.22', '2.39', '0.87', '0.94', '1.09', '0.96', '0.37', '0.27', '2.99', '2.15', '1.47', '1.60', '1.47', '3.55', '0.86', '1.18', '1.27', '1.36', '1.35', '1.33', '1.03', '1.02', '1.01', '1.20', '1.29', '1.20', '1.41', '0.56', '1.16']	1.1527	['0.96', '0.80', '1.10', '0.71', '0.66', '0.64', '0.90', '0.99', '1.09', '0.77', '2.21', '1.61', '0.93', '0.59', '0.80', '0.43', '1.11', '0.48', '0.87', '0.89', '0.91', '0.75', '1.30', '1.15', '0.94', '1.01', '1.07', '0.32', '0.55', '0.40', '0.38', '0.48', '0.45']	0.782521	['0.69', '0.80', '2.02', '1.19', '1.02', '1.12', '1.56', '1.44', '1.33', '1.40', '3.00', '2.98', '1.20', '1.52', '0.56', '1.23', '1.32', '1.32', '5.53', '1.03', '0.95', '1.15', '1.08', '0.97', '1.35', '0.99', '0.94']	1.29201
sp|B7US99|RL20_ECO27	B7US99	50S ribosomal protein L20 OS=Escherichia coli O127:H6 (strain E2348/69 / EPEC) GN=rplT PE=3 SV=1	rplT	0.69971	['0.56', '0.57', '1.18', '0.32', '0.31', '0.19', '1.70', '1.82', '1.03', '0.74', '0.59', '0.69']	0.659352	['0.25', '0.20', '1.00', '0.16', '0.30', '0.15', '1.66', '0.72', '1.22', '0.43', '1.97', '0.41', '0.33', '0.17', '0.26']	0.425523	['0.12', '0.77', '0.99', '1.12', '2.54', '0.65', '0.30', '0.74', '0.39', '0.16', '0.10', '1.16']	0.503106	['1.33', '1.37', '1.65', '4.70', '4.24', '2.03', '1.43', '1.97', '1.30', '1.34', '1.75', '1.44', '1.29', '1.30', '1.12']	1.69814
sp|A7ZS83|RL21_ECO24	A7ZS83	50S ribosomal protein L21 OS=Escherichia coli O139:H28 (strain E24377A / ETEC) GN=rplU PE=3 SV=1	rplU	0.850262	['1.07', '0.34', '0.80', '0.32', '0.21', '0.05', '2.60', '1.67', '11.70', '0.52', '0.53', '0.51']	0.666242	['0.79', '0.79', '0.79', '0.97', '0.73', '0.93', '0.73', '0.74', '0.76']	0.798776	['0.61', '0.64', '0.62', '0.80', '0.87', '1.52', '1.05', '1.03', '0.97', '0.18', '0.21', '0.22', '0.31', '0.30', '0.26', '0.66', '0.62', '0.61', '1.38', '1.40', '0.96']	0.601927	['2.82', '2.61', '1.73', '1.25', '1.23', '1.24', '1.51', '1.63', '1.37']	1.63158
sp|B7UK39|RL22_ECO27	B7UK39	50S ribosomal protein L22 OS=Escherichia coli O127:H6 (strain E2348/69 / EPEC) GN=rplV PE=3 SV=1	rplV	0.859692	['1.71', '4.38', '0.56', '0.54', '0.58', '0.72', '0.70', '0.68', '0.50', '1.09', '0.98', '1.42', '0.75', '0.60', '1.14', '1.17', '0.89', '1.65', '0.52', '0.50', '0.52', '0.48', '0.49', '0.73', '0.42', '0.54', '0.51', '0.44', '0.35', '0.31', '0.60', '0.48', '0.56', '0.29', '0.40', '0.37', '0.73', '0.43', '0.41', '1.85', '0.40', '0.29', '0.79', '0.06', '0.32', '0.52', '0.41', '0.51', '0.37', '0.45'…	0.594139	['1.29', '1.26', '0.72', '1.18', '1.34', '1.89', '1.37', '3.54', '1.23', '1.53', '2.26', '1.69', '1.29', '1.26', '0.83', '1.06', '1.01', '1.08', '1.00', '0.94', '1.03', '0.98', '1.05', '0.83', '0.89', '0.90', '0.97', '0.78', '0.76', '0.72', '1.21', '1.15', '1.12', '0.54', '0.81', '0.64', '1.56', '1.38', '1.45', '0.86', '0.91', '0.80', '0.90', '0.62', '0.69', '0.91', '1.03', '1.01', '0.91', '0.88'…	1.0224	['0.64', '0.86', '0.64', '1.10', '1.29', '1.82', '1.12', '1.10', '1.01', '0.40', '0.51', '0.67', '0.90', '0.77', '0.46', '0.85', '0.74', '0.67', '0.78', '0.76', '0.78', '0.79', '0.85', '0.99', '0.85', '0.71', '0.83', '0.65', '0.63', '0.58', '1.05', '0.90', '1.02', '0.78', '1.10', '0.84', '1.76', '0.88', '0.96', '0.66', '0.71', '0.76', '0.75', '0.39', '0.68', '1.08', '0.86', '1.04', '0.84', '0.82'…	0.754697	['1.18', '1.06', '0.86', '0.87', '1.27', '1.23', '0.54', '0.61', '0.54', '0.44', '0.76', '0.95', '0.78', '0.83', '0.78', '1.22', '1.22', '1.05', '1.10', '1.22', '0.89', '1.46', '0.99', '1.26', '0.97', '0.93', '1.10', '1.26', '0.73', '1.29', '1.10', '0.85', '1.29', '0.91', '0.67', '0.83', '2.01', '2.73', '18.68', '1.82', '1.88', '2.21', '1.08', '3.73', '1.28', '1.16', '1.23', '3.36', '0.46', '1.07…	1.19149
sp|P0ADZ2|RL23_ECO57	P0ADZ2	50S ribosomal protein L23 OS=Escherichia coli O157:H7 GN=rplW PE=1 SV=1	rplW	0.948501	['0.59', '0.53', '0.95']	0.669095	['1.52', '0.83', '1.42', '1.11', '0.90', '0.91', '1.02', '0.93', '0.98']	1.04741	['0.90', '0.96', '1.05']	0.967309	['1.72', '1.11', '0.89', '1.23', '1.22', '1.13']	1.19394
sp|B7UFK2|RL25_ECO27	B7UFK2	50S ribosomal protein L25 OS=Escherichia coli O127:H6 (strain E2348/69 / EPEC) GN=rplY PE=3 SV=1	rplY	0.958269	['1.24', '1.15', '1.16', '0.47', '0.43', '0.80', '0.82', '0.72', '1.43', '0.54', '0.42', '0.64', '0.49', '0.49', '0.82', '0.32', '0.18', '0.43', '0.39', '0.44', '0.41', '0.40', '0.31', '0.44', '0.49', '0.51', '0.91', '0.43', '0.48', '0.72', '0.47', '0.50', '0.49', '0.69', '0.53', '0.60', '0.70', '0.52', '0.61', '0.77', '0.77', '0.82', '1.04', '1.49', '0.93', '2.27', '1.21', '1.13']	0.631318	['1.88', '1.92', '1.87', '0.64', '0.84', '0.28', '0.72', '0.84', '0.83', '1.74', '1.49', '1.27', '1.42', '1.34', '1.46', '0.88', '1.29', '0.12', '1.32', '1.35', '1.36', '1.28', '1.26', '1.24', '0.82', '0.86', '0.68', '0.91', '0.89', '0.89', '0.65', '0.60', '0.71', '1.79', '1.68', '1.44', '1.33', '1.42', '1.35', '1.35', '1.21', '1.36', '2.45', '1.70', '2.81', '1.83', '1.42', '1.99', '1.08', '1.13'…	1.23771	['0.69', '0.69', '0.70', '0.96', '1.22', '1.49', '0.60', '0.80', '0.80', '0.50', '0.51', '0.76', '1.75', '1.92', '0.44', '1.03', '1.05', '1.02', '1.17', '1.20', '1.17', '1.36', '1.36', '1.16', '1.06', '1.01', '1.02', '1.17', '1.11', '1.13', '0.89', '0.95', '0.83', '0.99', '0.93', '0.96', '1.01', '1.01', '1.00', '1.20', '1.41', '1.01', '1.17', '1.41', '1.04', '1.10', '0.98', '1.45', '1.73', '1.31'…	0.983142	['0.50', '0.73', '0.88', '1.01', '0.97', '1.33', '0.96', '1.02', '1.09', '1.80', '2.51', '1.65', '1.45', '0.98', '1.00', '1.23', '0.63', '1.04', '1.06', '1.43', '1.03', '1.05', '1.16', '1.26', '1.06', '1.32', '1.27', '1.37', '1.62', '1.51', '1.52', '1.04', '1.15', '0.27', '0.98', '1.07']	1.09766
sp|A7ZS81|RL27_ECO24	A7ZS81	50S ribosomal protein L27 OS=Escherichia coli O139:H28 (strain E24377A / ETEC) GN=rpmA PE=3 SV=1	rpmA	1.14546	['0.59', '0.69', '1.18', '0.94', '1.04', '1.75', '0.17', '0.19', '0.36', '0.82', '0.78', '0.82']	0.644456	['3.55', '3.31', '1.47', '1.52', '1.55', '1.52', '1.89', '1.05', '1.47', '1.23', '1.24', '1.17', '0.70', '0.83', '1.45', '1.02', '1.02', '0.98', '1.14', '1.23', '1.06']	1.33204	['1.25', '0.62', '1.08', '1.77', '1.88', '1.83', '2.11', '7.34', '2.69', '1.05', '1.14', '0.98', '1.03', '0.99', '0.97', '0.78', '0.69', '0.61']	1.27646	['1.18', '3.18', '4.05', '0.81', '1.58', '2.06', '0.60', '1.12', '1.54', '2.16', '1.84', '1.25', '1.70', '1.73', '2.64', '1.03', '1.04', '1.20', '1.28', '1.66', '3.02']	1.5711
sp|B7UK36|RL29_ECO27	B7UK36	50S ribosomal protein L29 OS=Escherichia coli O127:H6 (strain E2348/69 / EPEC) GN=rpmC PE=3 SV=1	rpmC	0.963296	['1.89', '0.48', '0.38', '0.43', '0.45', '0.39', '3.33', '1.53', '0.29', '0.53', '0.54', '0.54', '0.55', '0.53', '0.51', '0.33', '0.34', '0.55', '0.41', '0.42', '0.39', '0.92', '2.74', '0.69', '0.96', '1.00', '1.02']	0.640847	['3.01', '2.97', '3.04', '3.08', '2.80', '2.97', '2.59', '2.64', '2.66', '2.09', '2.18', '2.17', '1.18', '1.18', '1.17', '1.09', '1.11', '1.11', '1.66', '1.62', '0.94', '1.20', '1.29', '1.01']	1.7852	['0.39', '0.39', '0.41', '0.51', '0.56', '0.53', '0.53', '0.53', '0.60', '0.34', '0.34', '0.34', '0.42', '0.42', '0.42', '0.66', '0.65', '0.66', '0.81', '0.81', '0.78', '0.81', '0.73', '0.88', '0.53', '0.56', '0.82', '0.99', '0.90', '0.82']	0.574377	['0.88', '0.98', '0.80', '0.81', '0.75', '0.88', '0.64', '0.66', '2.81', '1.39', '1.38', '1.33', '1.16', '1.16', '1.22', '1.52', '1.76', '1.25', '1.59', '1.69', '1.57', '1.46', '1.60', '1.53', '3.37', '1.52', '3.10']	1.31039
sp|B7UNQ6|RL31_ECO27	B7UNQ6	50S ribosomal protein L31 OS=Escherichia coli O127:H6 (strain E2348/69 / EPEC) GN=rpmE PE=3 SV=1	rpmE	0.877465	['0.41', '0.42', '0.42', '0.54', '0.55', '0.57', '0.52', '0.54', '0.58', '0.55', '0.68', '0.52', '0.25', '0.21', '0.28', '0.09', '0.45', '0.84', '0.35', '0.34', '0.33', '0.41', '0.41', '0.25', '0.33', '0.27', '0.28', '0.30', '1.91', '1.39']	0.424166	['1.20', '1.20', '1.20', '1.12', '1.15', '1.10', '2.30', '2.34', '2.36', '1.92', '1.68', '1.90', '1.21', '1.21', '1.20', '0.74', '0.77', '0.72', '2.44', '5.55', '1.81', '0.76', '0.78', '0.77', '0.85', '0.85', '1.09', '1.03', '1.01', '1.06', '1.11', '1.07', '1.08']	1.25314	['0.71', '0.71', '0.70', '0.84', '0.85', '0.83', '0.69', '0.72', '0.69', '0.71', '0.84', '0.80', '0.85', '0.85', '0.80', '1.10', '0.90', '0.85', '0.59', '0.60', '0.58', '0.64', '0.64', '0.66', '0.59', '0.60', '0.60', '0.87', '0.92', '0.95', '2.77', '2.16', '2.22']	0.827054	['1.20', '1.26', '1.14', '1.06', '1.08', '1.19', '1.43', '1.57', '1.29', '0.95', '0.93', '1.43', '1.42', '1.34', '1.40', '1.28', '1.27', '1.12', '1.90', '1.56', '0.95', '1.19', '1.18', '1.14', '1.07', '1.07', '2.01', '2.08', '1.60', '1.64', '1.50', '1.05', '1.28', '2.10', '2.79', '1.69']	1.3485
sp|B7UPA5|RL32_ECO27	B7UPA5	50S ribosomal protein L32 OS=Escherichia coli O127:H6 (strain E2348/69 / EPEC) GN=rpmF PE=3 SV=1	rpmF	0.87242	['0.23', '0.59', '0.07', '0.75', '0.72', '0.47', '0.10', '1.00', '1.21', '0.78', '0.59', '0.78', '0.47', '0.54', '0.54', '0.72', '0.52', '0.54', '0.66', '0.72', '1.32', '0.76', '0.61', '0.39', '0.80', '0.81', '0.95']	0.567941	['1.90', '2.55', '1.90', '0.98', '1.76', '1.63', '0.54', '2.07', '0.60', '1.86', '1.99', '0.93', '1.14', '1.92', '1.76', '1.12', '1.08', '1.11', '0.75', '0.77', '0.82', '1.09', '1.53', '1.11', '1.69', '2.39', '1.05', '0.57', '1.83', '1.20', '1.87', '3.09', '1.72', '3.00', '3.03', '3.34']	1.4356	['0.82', '0.65', '0.45', '0.57', '0.71', '0.79', '0.14', '0.72', '0.15', '0.71', '0.72', '0.96', '0.59', '0.57', '0.66', '0.77', '0.78', '0.81', '0.96', '0.90', '0.90', '1.00', '0.78', '0.92', '0.64', '0.66', '0.65', '0.89', '0.69', '0.87']	0.664768	['1.91', '3.26', '1.71', '2.85', '1.04', '2.00', '2.88', '0.78', '2.53', '0.34', '0.65', '0.39', '0.93', '0.89', '0.53', '2.09', '1.23', '0.91', '1.37', '1.26', '0.29', '2.35', '1.26', '0.50', '0.44', '0.37', '1.59']	1.0688
sp|A7ZTI7|RL33_ECO24	A7ZTI7	50S ribosomal protein L33 OS=Escherichia coli O139:H28 (strain E24377A / ETEC) GN=rpmG PE=3 SV=1	rpmG	0.989722	['0.08', '0.08', '0.77', '0.28', '3.17', '0.25']	0.321356	['2.38', '0.55', '3.54', '4.27', '2.48', '2.29', '2.11', '0.39', '2.15', '0.83', '1.13', '0.69', '1.22', '1.25', '1.24', '0.70', '0.73', '0.73', '7.34', '6.88', '8.01']	1.64925	['0.78', '0.67', '0.64', '0.93', '0.82', '0.76', '0.79', '0.69', '0.78', '2.62', '1.14', '1.43', '0.66', '0.55', '0.74', '0.93', '0.92', '0.92', '0.98', '1.10', '0.98', '0.77', '0.37', '0.46']	0.826747	['1.89', '2.28', '2.56', '2.37', '1.62', '2.60']	2.18981
sp|A7ZSI4|RPOA_ECO24	A7ZSI4	DNA-directed RNA polymerase subunit alpha OS=Escherichia coli O139:H28 (strain E24377A / ETEC) GN=rpoA PE=3 SV=1	rpoA	0.776185	['0.82', '1.39', '0.67', '0.50', '0.29', '0.53', '0.30', '0.37', '0.32', '0.57', '0.73', '0.52', '0.63', '0.64', '0.54', '0.46', '1.20', '0.58', '6.28', '1.83', '1.30', '0.74', '0.64', '0.78', '0.82', '0.98', '0.68', '0.48', '0.78', '0.59', '1.00', '0.81', '0.24', '0.62', '0.84', '0.53', '1.42', '3.17', '1.28', '1.40', '0.95', '0.68', '0.42', '0.37', '0.38', '0.63', '0.56', '0.62', '0.37', '0.56'…	0.725617	['0.72', '7.73', '0.67', '0.68', '0.56', '0.77', '0.84', '1.05', '0.83', '0.52', '0.67', '0.75', '0.93', '1.42', '1.69', '0.63', '0.65', '0.29', '2.38', '3.06', '1.14', '1.43', '1.14', '1.44', '0.76', '0.93', '0.84', '0.88', '6.02', '0.62', '4.44', '0.08', '3.20', '0.48', '1.94', '2.69', '0.52', '1.19', '1.78', '0.29', '0.60', '1.42', '1.06', '0.78', '0.81', '0.86', '0.72', '0.71', '0.97', '0.98'…	0.916144	['0.55', '0.55', '2.86', '0.60', '0.68', '0.40', '0.68', '0.81', '0.78', '0.52', '0.91', '0.44', '0.45', '0.37', '0.35', '0.62', '0.67', '0.50', '0.70', '0.66', '0.87', '0.57', '0.45', '0.57', '0.40', '0.78', '0.54', '0.27', '0.35', '0.40', '0.37', '0.45', '0.34', '0.98', '0.69', '0.47', '0.80', '0.85', '0.73', '0.91', '1.34', '0.36', '0.94', '0.58', '0.82', '1.71', '1.28', '0.65', '0.64', '0.51'…	0.530878	['1.29', '1.15', '1.03', '1.52', '1.30', '1.32', '0.95', '0.94', '0.28', '0.58', '0.78', '1.09', '1.45', '1.37', '1.53', '1.47', '1.47', '1.45', '1.11', '0.72', '0.38', '1.01', '0.87', '0.98', '1.18', '0.96', '1.46', '0.52', '0.52', '0.53', '0.49', '0.49', '0.49', '0.78', '1.03', '1.13', '1.68', '0.84', '0.75', '0.89', '0.64', '0.59', '3.29', '3.15', '1.67', '1.78', '5.39', '1.58', '1.10', '1.03'…	1.02848
sp|A7ZUK1|RPOB_ECO24	A7ZUK1	DNA-directed RNA polymerase subunit beta OS=Escherichia coli O139:H28 (strain E24377A / ETEC) GN=rpoB PE=3 SV=1	rpoB	0.897472	['1.05', '0.63', '0.42', '0.68', '0.69', '0.61', '0.66', '0.71', '1.01', '0.56', '0.74', '0.55', '0.69', '0.78', '0.84', '0.84', '0.88', '0.80', '1.60', '0.89', '0.76', '0.82', '0.69', '0.41', '2.45', '2.38', '0.98', '0.76', '0.78', '0.78', '0.77', '1.04', '1.06', '1.00', '0.85', '0.36', '2.17', '2.17', '2.12', '0.88', '0.87', '0.80', '1.02', '1.47', '0.92', '0.80', '0.80', '0.49', '0.63', '0.68'…	0.822978	['0.65', '0.65', '0.41', '1.84', '1.78', '1.73', '0.91', '1.06', '1.00', '0.81', '0.94', '0.81', '0.91', '0.86', '0.84', '0.65', '1.18', '0.58', '1.03', '1.06', '1.04', '2.16', '1.60', '1.61', '0.84', '1.41', '1.25', '0.80', '0.74', '0.73', '0.67', '0.63', '0.84', '1.67', '1.64', '1.55', '9.40', '4.74', '3.49', '5.49', '3.24', '6.32', '0.60', '0.94', '0.95', '0.74', '0.65', '1.03', '3.07', '3.06'…	0.968503	['0.71', '0.74', '0.65', '2.08', '1.52', '1.23', '0.54', '0.47', '0.50', '0.68', '0.70', '0.68', '0.64', '0.70', '0.82', '0.49', '1.25', '0.59', '0.86', '0.75', '1.47', '0.48', '0.43', '0.43', '0.76', '0.66', '0.24', '0.46', '0.63', '0.89', '0.81', '1.11', '1.11', '1.20', '1.26', '3.22', '0.60', '0.50', '0.59', '0.76', '0.76', '1.22', '3.07', '2.02', '1.10', '0.73', '0.81', '0.87', '0.80', '0.68'…	0.810431	['1.11', '1.13', '1.10', '0.88', '1.16', '1.07', '0.99', '0.94', '1.12', '0.87', '1.00', '0.76', '1.02', '0.99', '1.18', '0.91', '1.10', '1.10', '0.21', '0.41', '0.58', '0.30', '0.26', '0.77', '1.58', '1.37', '1.30', '0.99', '1.23', '1.07', '1.23', '1.02', '1.08', '1.23', '1.43', '1.49', '0.88', '0.94', '1.33', '0.92', '0.95', '1.02', '1.49', '0.13', '0.38', '1.55', '1.44', '1.34', '0.57', '0.71'…	1.00433
sp|P0A8T8|RPOC_ECO57	P0A8T8	DNA-directed RNA polymerase subunit beta' OS=Escherichia coli O157:H7 GN=rpoC PE=3 SV=1	rpoC	0.941669	['0.86', '1.17', '0.83', '1.32', '0.83', '0.85', '0.77', '0.83', '0.55', '0.23', '0.43', '0.49', '0.20', '0.24', '0.27', '0.18', '0.28', '1.42', '0.74', '0.71', '0.77', '0.71', '0.75', '0.79', '0.93', '0.82', '0.93', '1.26', '1.05', '0.90', '1.00', '1.01', '1.22', '1.27', '1.24', '0.89', '0.96', '1.39', '0.59', '0.63', '1.22', '0.48', '0.85', '0.85', '0.94', '0.89', '1.06', '0.58', '0.92', '0.81'…	0.884617	['0.89', '0.65', '0.89', '0.65', '0.64', '0.65', '0.83', '0.54', '0.82', '0.78', '0.78', '0.72', '0.82', '0.75', '1.01', '0.65', '0.56', '0.73', '0.68', '0.66', '0.76', '3.09', '1.21', '0.58', '0.78', '1.44', '0.80', '1.12', '1.08', '0.89', '0.82', '0.38', '0.16', '1.00', '0.97', '1.15', '1.19', '0.92', '0.69', '0.90', '0.88', '1.02', '1.11', '1.28', '1.32', '2.87', '1.83', '2.30', '0.62', '2.00'…	1.06129	['0.80', '0.67', '0.70', '0.66', '0.94', '0.07', '1.18', '1.01', '2.09', '1.01', '1.04', '1.07', '0.30', '0.39', '1.37', '0.33', '0.42', '0.73', '0.96', '1.16', '0.60', '0.68', '0.43', '0.34', '1.17', '1.11', '1.11', '0.65', '0.81', '0.76', '0.37', '0.65', '0.48', '0.57', '0.98', '0.59', '1.40', '1.51', '1.29', '1.70', '1.30', '0.87', '1.50', '0.91', '3.98', '0.74', '0.72', '0.69', '1.27', '1.46'…	0.800414	['2.01', '1.13', '1.22', '1.22', '1.25', '0.55', '1.40', '0.72', '0.49', '1.04', '1.52', '1.33', '0.56', '0.76', '0.83', '0.37', '0.52', '0.54', '0.97', '1.00', '1.23', '0.88', '0.63', '0.88', '1.04', '0.98', '0.96', '1.21', '1.14', '1.03', '0.89', '1.17', '0.79', '1.16', '1.04', '1.12', '0.99', '0.74', '1.36', '1.20', '1.18', '0.68', '1.39', '1.61', '1.10', '0.80', '0.87', '1.58', '0.26', '1.61'…	1.04638
sp|P00579|RPOD_ECOLI	P00579	RNA polymerase sigma factor rpoD OS=Escherichia coli (strain K12) GN=rpoD PE=1 SV=2	rpoD	0.815157	['1.33', '1.22', '1.23', '0.86', '0.53', '0.77', '0.71', '0.70', '0.72', '1.28', '1.16', '2.00', '0.93', '0.92', '0.89', '0.54', '1.05', '0.43', '2.12', '4.77', '1.08', '1.05', '1.24', '3.00', '0.70', '0.65', '0.63']	1.01897	['0.45', '0.54', '0.37', '0.69', '0.86', '0.74', '0.72', '0.72', '0.63', '0.26', '0.18', '0.11', '0.43', '0.40', '0.57', '0.67', '0.86', '0.70', '0.27', '0.38', '1.98', '0.78', '0.61', '0.82', '1.97', '2.33', '2.95', '0.91', '0.94', '0.70', '0.94', '0.86', '1.81', '0.85', '0.58', '0.30', '3.26', '9.81', '4.86', '0.76', '1.20', '1.64', '0.55', '0.54', '0.86', '1.28', '1.62', '0.93']	0.811386	['0.90', '0.60', '0.91', '1.10', '1.81', '0.93', '0.74', '2.67', '2.64', '0.04', '0.07', '0.03', '1.11', '0.62', '0.63', '0.17', '0.56', '0.25', '1.06', '0.82', '0.70', '0.12', '0.15', '0.20', '0.63', '0.19', '0.24', '0.75', '2.30', '4.33', '0.20', '0.20', '0.20', '0.05', '0.11', '0.02', '0.34', '0.37', '0.54', '1.42', '1.49', '5.19', '1.16', '0.99', '0.88']	0.465223	['2.12', '0.71', '0.97', '3.09', '19.83', '13.44', '2.23', '1.74', '4.41', '1.66', '1.60', '1.28', '0.42', '0.76', '0.87', '0.26', '0.25', '0.19', '0.63', '0.69', '0.97', '1.56', '2.56', '4.11', '1.88', '1.02', '0.68', '0.82', '0.90', '0.95', '2.42', '1.23', '2.74', '0.87', '0.74', '1.51', '1.58', '1.97', '1.32', '1.12', '1.10', '0.97', '1.17', '0.78', '1.12', '1.05', '0.61', '0.87', '0.74', '0.6…	1.14792
sp|P0AG69|RS1_ECO57	P0AG69	30S ribosomal protein S1 OS=Escherichia coli O157:H7 GN=rpsA PE=3 SV=1	rpsA	0.863128	['1.21', '1.64', '1.84', '1.37', '1.32', '0.80', '1.61', '2.12', '2.99', '3.31', '1.69', '3.34', '0.32', '0.30', '0.36', '0.33', '0.25', '0.20', '1.18', '1.03', '0.97', '1.10', '1.09', '1.13', '0.73', '0.73', '0.78', '1.39', '0.39', '1.23', '0.63', '0.66', '0.57', '0.56', '0.60', '0.37', '0.71', '0.70', '0.70', '0.65', '1.02', '0.65', '0.92', '0.99', '0.96', '0.59', '0.60', '0.64', '0.68', '0.67'…	0.800884	['1.08', '0.98', '0.91', '0.78', '0.76', '0.77', '4.29', '4.79', '5.12', '3.16', '3.29', '2.94', '3.26', '3.67', '6.49', '0.47', '0.47', '0.46', '0.78', '0.30', '0.58', '2.50', '2.11', '2.21', '1.58', '1.39', '1.57', '0.90', '0.85', '1.06', '1.34', '1.31', '1.03', '1.41', '0.82', '1.34', '1.86', '1.79', '1.57', '0.45', '0.62', '1.04', '0.74', '0.75', '0.74', '0.86', '0.86', '0.55', '0.70', '0.72'…	0.999979	['0.67', '0.77', '0.64', '0.92', '1.51', '1.87', '0.17', '0.23', '0.19', '0.22', '0.23', '0.40', '0.36', '0.37', '0.36', '0.45', '0.30', '0.31', '0.29', '0.26', '0.26', '0.29', '0.30', '0.30', '0.57', '0.58', '0.59', '1.89', '1.73', '0.84', '0.48', '0.55', '0.60', '0.46', '0.40', '0.51', '0.44', '0.59', '0.64', '0.33', '0.45', '0.34', '0.74', '0.82', '0.78', '0.34', '1.87', '0.57', '0.53', '0.52'…	0.580476	['2.14', '1.69', '1.60', '1.66', '1.23', '1.87', '0.70', '1.03', '1.04', '1.01', '1.07', '1.05', '1.37', '1.68', '1.19', '1.45', '1.43', '1.35', '0.56', '0.52', '0.57', '0.50', '0.55', '0.55', '1.08', '1.03', '0.80', '0.59', '1.08', '0.95', '0.65', '2.64', '1.16', '0.88', '0.94', '0.71', '0.97', '0.97', '2.45', '1.68', '1.72', '1.69', '4.08', '1.10', '0.72', '1.10', '1.13', '1.12', '1.06', '1.08'…	1.19387
sp|B7MBF0|RS2_ECO45	B7MBF0	30S ribosomal protein S2 OS=Escherichia coli O45:K1 (strain S88 / ExPEC) GN=rpsB PE=3 SV=1	rpsB	0.877969	['0.67', '0.32', '0.10', '0.37', '0.45', '0.36', '0.35', '0.39', '0.39', '0.47', '0.75', '0.62', '0.46', '0.50', '0.56', '0.42', '0.63', '0.56', '0.47', '0.61', '0.68', '0.63', '0.51', '0.43', '0.52', '0.51', '0.66', '0.37', '0.50', '0.88', '0.37', '0.77', '0.33', '5.05', '1.18', '4.32', '1.24', '0.99', '1.05', '1.43', '1.44', '1.66', '1.60', '2.06', '1.52', '1.06', '2.51', '1.15', '0.60', '0.73'…	0.719043	['0.39', '0.50', '0.87', '0.83', '0.76', '0.72', '0.30', '0.63', '0.57', '0.35', '0.36', '0.59', '0.60', '0.81', '0.61', '0.57', '0.51', '0.49', '0.78', '0.79', '0.74', '1.59', '1.19', '1.25', '1.56', '1.34', '1.51', '0.67', '0.53', '0.72', '0.70', '0.74', '0.69', '0.44', '0.45', '0.55', '0.75', '0.75', '0.79', '1.15', '1.21', '1.31', '0.57', '0.60', '0.75', '7.63', '1.67', '6.69', '1.34', '1.33'…	1.3485	['4.03', '3.19', '2.64', '1.62', '0.68', '1.54', '0.38', '0.38', '1.02', '0.28', '0.43', '0.72', '0.35', '0.43', '0.33', '0.55', '0.42', '0.40', '0.60', '0.62', '0.85', '0.03', '0.04', '0.07', '2.61', '1.88', '2.27', '0.59', '0.52', '0.20', '0.56', '0.58', '0.93', '0.94', '0.51', '1.44', '0.48', '0.41', '0.41', '0.34', '0.34', '0.46', '0.48', '0.45', '0.60', '0.55', '0.53', '0.60', '5.14', '4.32'…	0.662544	['1.24', '1.46', '0.82', '0.69', '0.29', '0.95', '0.39', '0.56', '0.97', '1.97', '1.47', '0.79', '1.51', '1.49', '1.55', '1.49', '1.53', '1.55', '1.02', '0.64', '0.56', '1.47', '0.34', '0.02', '0.47', '0.52', '0.41', '0.25', '1.07', '0.77', '0.11', '1.05', '0.15', '1.10', '1.13', '0.95', '1.11', '1.30', '0.80', '1.67', '2.10', '0.85', '1.12', '2.13', '0.57', '2.15', '2.12', '1.30', '1.24', '0.96'…	0.9249
sp|A7ZSK3|RS3_ECO24	A7ZSK3	30S ribosomal protein S3 OS=Escherichia coli O139:H28 (strain E24377A / ETEC) GN=rpsC PE=3 SV=1	rpsC	0.917129	['0.53', '0.50', '0.12', '0.46', '1.62', '0.58', '4.04', '1.95', '2.99', '1.33', '1.38', '1.20', '0.56', '0.33', '0.30', '2.67', '0.92', '0.38', '2.01', '2.75', '2.25', '0.49', '0.76', '0.50', '1.00', '0.85', '1.05', '0.48', '0.53', '0.58', '0.79', '0.68', '0.55', '0.57', '0.60', '0.61', '0.74', '0.71', '0.67', '0.90', '0.97', '0.90', '0.60', '0.61', '0.43', '0.49', '0.59', '0.45', '0.85', '0.85'…	0.689251	['0.96', '0.96', '0.88', '1.20', '0.99', '0.90', '0.85', '0.80', '0.78', '0.55', '0.98', '1.63', '0.92', '0.89', '1.02', '0.87', '1.34', '1.02', '1.72', '1.62', '1.70', '1.31', '1.22', '0.95', '0.85', '1.32', '1.21', '0.74', '0.73', '0.85', '1.30', '1.27', '1.49', '1.24', '1.10', '1.08', '1.06', '1.02', '1.04', '0.99', '1.05', '1.05', '0.93', '0.91', '0.86', '0.64', '0.75', '0.68', '0.55', '6.91'…	0.932873	['0.31', '0.41', '0.16', '0.48', '0.35', '0.64', '0.79', '0.63', '0.90', '1.33', '0.82', '0.83', '1.25', '1.15', '1.04', '1.21', '0.95', '1.99', '1.29', '0.85', '0.85', '1.10', '0.93', '1.14', '1.07', '1.27', '1.06', '0.77', '0.64', '0.64', '0.78', '0.69', '0.73', '0.75', '0.82', '1.02', '0.68', '0.64', '0.70', '0.86', '0.77', '0.79', '0.79', '0.85', '1.37', '0.94', '1.00', '1.18', '0.66', '0.69'…	0.803005	['0.30', '7.95', '10.68', '1.45', '0.56', '1.76', '1.77', '11.58', '1.58', '2.46', '5.86', '2.84', '1.65', '2.29', '1.90', '0.14', '0.20', '0.03', '2.08', '0.62', '0.44', '1.77', '1.68', '1.77', '1.24', '1.19', '1.87', '2.06', '0.94', '1.37', '1.68', '2.44', '1.35', '1.53', '1.41', '1.80', '1.15', '0.90', '1.09', '1.64', '1.23', '1.87', '1.30', '1.52', '1.78', '2.24', '2.22', '1.35', '0.78', '0.9…	1.37026
sp|B7UK20|RS4_ECO27	B7UK20	30S ribosomal protein S4 OS=Escherichia coli O127:H6 (strain E2348/69 / EPEC) GN=rpsD PE=3 SV=1	rpsD	1.05929	['0.80', '0.89', '0.64', '2.01', '1.84', '3.31', '2.24', '5.29', '1.07', '0.90', '0.52', '0.73', '0.61', '0.65', '0.91', '0.69', '0.70', '0.62', '0.91', '0.90', '0.91', '1.17', '1.07', '1.24', '2.48', '1.82', '2.92', '0.98', '1.20', '1.36', '1.12', '1.15', '1.28', '0.67', '0.66', '0.59', '0.69', '0.55', '0.61', '0.87', '0.87', '0.81', '3.40', '5.66', '0.60', '1.07', '2.55', '0.49']	1.08809	['0.96', '0.96', '0.78', '1.29', '0.71', '0.52', '0.97', '3.39', '1.40', '1.40', '0.95', '1.00', '0.66', '0.92', '0.73', '0.87', '1.05', '1.23', '0.96', '0.95', '0.96', '0.84', '0.79', '0.76', '0.81', '0.86', '0.53', '1.07', '1.17', '0.90', '1.39', '1.74', '1.96', '1.48', '1.61', '1.70', '1.41', '0.91', '0.89', '1.11', '1.04', '0.91', '0.97', '0.81', '1.03', '0.90', '0.65', '0.64', '1.50', '1.51'…	1.05788	['1.48', '1.83', '0.47', '1.04', '0.92', '0.92', '0.82', '0.81', '0.92', '1.45', '1.72', '1.47', '1.48', '1.10', '1.14', '1.08', '0.55', '4.13', '0.61', '0.61', '1.46', '0.62', '0.51', '0.60', '0.71', '0.76', '0.53', '0.88', '0.84', '0.90', '0.78', '1.74', '2.39', '0.71', '1.62', '2.83', '0.93', '0.99', '1.00', '0.82', '0.82', '1.01', '0.84', '0.97', '0.87', '0.95', '1.02', '1.12']	1.0033	['0.99', '1.03', '1.30', '1.46', '1.44', '1.43', '1.40', '0.80', '0.14', '6.40', '4.88', '1.14', '1.35', '1.12', '1.16', '1.15', '1.13', '0.79', '1.40', '1.40', '1.41', '1.24', '1.17', '1.14', '0.38', '1.26', '2.09', '1.78', '1.89', '1.79', '1.47', '1.43', '1.46', '0.32', '0.43', '0.47', '0.69', '1.27', '0.69', '0.86', '1.40', '2.01', '1.17', '1.50', '1.29', '0.97', '1.03', '1.00', '0.30', '0.83'…	1.09025
sp|A7ZV71|RS6_ECO24	A7ZV71	30S ribosomal protein S6 OS=Escherichia coli O139:H28 (strain E24377A / ETEC) GN=rpsF PE=3 SV=1	rpsF	0.84188	['0.77', '0.83', '0.81', '0.86', '1.42', '0.94', '0.27', '0.47', '0.36', '0.80', '0.72', '0.91', '0.61', '0.60', '0.68', '0.70', '0.76', '0.77', '1.74', '2.33', '1.69', '0.59', '0.60', '0.71']	0.778835	['1.41', '1.28', '1.37', '1.73', '2.98', '1.70', '0.51', '1.08', '0.58', '0.65', '0.60', '0.87', '0.83', '0.82', '0.83', '1.16', '1.14', '1.22', '9.84', '11.85', '20.11', '2.24', '2.81', '1.03', '3.85', '4.18', '6.19', '1.60', '1.53', '1.98', '1.45', '4.46', '2.11', '1.62', '1.45', '1.60', '0.78', '0.77', '0.73', '1.70', '1.08', '1.31', '0.71', '1.87', '1.05', '0.37', '0.37', '0.39', '1.95', '1.5…	1.39855	['0.60', '0.67', '0.58', '0.55', '0.87', '0.57', '0.54', '0.64', '0.65', '0.69', '0.69', '0.75', '1.45', '1.91', '1.50', '0.41', '0.30', '0.40', '0.22', '0.25', '0.24', '0.18', '0.21', '0.20', '0.38', '0.40', '0.36', '0.44', '0.62', '0.22', '0.26', '0.34', '0.20', '0.57', '0.34', '1.53', '0.93', '1.04', '0.97', '0.96', '0.84', '0.85', '1.04', '0.67', '0.90']	0.537268	['0.45', '0.45', '0.37', '0.48', '0.53', '0.36', '1.21', '0.75', '1.30', '4.77', '1.08', '0.61', '1.36', '1.37', '1.38', '1.22', '1.05', '1.26', '0.42', '0.49', '0.46', '0.63', '0.84', '1.06', '0.62', '0.64', '0.61', '0.82', '0.90', '0.32', '0.50', '0.52', '1.48', '1.17', '1.10', '1.44', '1.43', '1.39', '1.44', '1.72', '1.37', '1.20', '1.42', '0.92', '0.43']	0.858392
sp|A7ZSL6|RS7_ECO24	A7ZSL6	30S ribosomal protein S7 OS=Escherichia coli O139:H28 (strain E24377A / ETEC) GN=rpsG PE=3 SV=1	rpsG	0.958836	['0.63', '0.59', '0.65', '0.76', '0.69', '0.66', '0.45', '1.06', '0.37', '0.96', '1.02', '0.97', '0.92', '0.94', '0.92', '0.13', '0.96', '1.05', '0.40', '0.49', '0.92', '0.77', '0.63', '0.73', '0.81', '0.87', '0.85', '0.94', '0.85', '1.20', '0.55', '0.52', '0.58', '0.40', '0.24', '0.61', '0.81', '0.73', '0.77']	0.677223	['1.18', '1.40', '1.16', '1.58', '1.60', '1.49', '1.19', '1.18', '1.06', '1.06', '1.03', '0.96', '1.48', '1.12', '1.16', '1.01', '0.93', '1.01', '1.24', '1.42', '1.22', '2.15', '2.11', '2.27', '1.15', '1.18', '1.19', '1.24', '2.91', '3.11', '2.96', '2.38', '2.27', '1.65', '1.89', '2.00', '1.34', '1.40', '1.49', '1.27', '1.36', '1.25', '0.20', '0.36', '0.60', '0.56', '0.54', '0.67', '0.39', '0.17'…	1.09237	['1.16', '0.84', '0.73', '0.96', '0.99', '0.90', '0.85', '1.19', '1.43', '1.44', '0.78', '0.76', '0.60', '0.83', '0.81', '0.34', '0.33', '0.31', '0.57', '0.54', '0.54', '0.32', '0.53', '0.38', '1.08', '1.29', '1.14', '0.55', '0.46', '0.47', '0.75', '0.74', '0.71', '0.80', '0.81', '0.93', '2.03', '2.57', '2.10', '2.84', '1.36', '2.75', '1.68', '1.43', '1.19', '0.55', '3.19', '1.69', '0.51', '1.69'…	0.976506	['1.67', '1.70', '1.71', '2.63', '2.09', '2.03', '1.30', '1.40', '1.59', '0.84', '0.11', '0.15', '1.76', '0.94', '0.74', '1.29', '0.97', '0.88', '1.51', '1.38', '1.42', '1.10', '1.04', '1.03', '0.80', '0.57', '1.06', '1.18', '1.21', '1.38', '1.13', '0.79', '1.40', '1.63', '1.71', '1.26', '1.27', '1.25', '1.27', '0.98', '1.21', '1.18', '0.88', '0.97', '0.36', '1.15', '0.97', '0.86', '1.36', '1.30'…	1.17004
sp|A7ZSJ5|RS8_ECO24	A7ZSJ5	30S ribosomal protein S8 OS=Escherichia coli O139:H28 (strain E24377A / ETEC) GN=rpsH PE=3 SV=1	rpsH	1.09787	['0.54', '0.53', '0.57', '0.39', '0.42', '0.51', '1.54', '0.95', '2.96', '2.96', '2.19', '25.89', '0.66', '0.61', '0.58', '0.87', '0.71', '0.73', '0.30', '0.80', '0.79', '0.56', '0.55', '0.52', '0.73', '0.59', '0.69', '0.85', '0.95', '0.90']	0.847702	['1.44', '1.46', '1.45', '1.28', '1.46', '1.65', '3.86', '5.03', '1.98', '2.21', '5.90', '0.18', '2.55', '3.00', '2.50', '1.31', '1.32', '1.65', '1.10', '1.12', '1.07', '0.64', '0.86', '0.48', '1.64', '6.06', '2.75', '2.46', '2.70', '6.91', '1.09', '0.84', '0.88', '0.41', '1.38', '3.98', '0.22', '0.49', '0.61', '0.80', '0.80', '0.71', '1.78', '1.66', '1.77', '1.07', '0.87', '0.81', '0.47', '0.51'…	1.31776	['1.46', '2.70', '3.23', '1.57', '1.57', '1.51', '1.52', '1.46', '1.55', '1.36', '1.30', '1.25', '0.93', '1.50', '0.70', '0.09', '3.76', '0.06', '1.13', '0.61', '0.77', '1.53', '1.60', '1.63', '1.52', '1.28', '1.79', '1.05', '0.75', '0.94', '1.10', '0.95', '0.93', '1.00', '0.60', '1.07', '4.15', '1.08', '0.90', '0.44', '0.65', '0.41', '1.04', '1.14', '1.12', '0.91', '0.92', '0.83', '1.69', '1.45'…	1.0932	['1.40', '1.39', '1.36', '1.39', '2.09', '1.53', '1.10', '1.92', '0.83', '0.38', '0.43', '0.72', '1.82', '1.10', '2.00', '1.42', '1.32', '1.07', '2.04', '2.49', '1.41', '1.81', '0.87', '1.08', '0.80', '0.92', '0.78', '0.72', '0.81', '0.94', '1.54', '1.52', '1.48', '1.12', '1.40', '1.21', '1.12', '1.20', '1.04', '1.25', '1.23', '1.40']	1.18963
sp|A7ZSL0|RS10_ECO24	A7ZSL0	30S ribosomal protein S10 OS=Escherichia coli O139:H28 (strain E24377A / ETEC) GN=rpsJ PE=3 SV=1	rpsJ	0.953667	['0.67', '0.60', '0.61', '0.63', '0.57', '0.51', '0.63', '0.57', '0.71', '0.58', '0.59', '0.55', '0.49', '1.97', '0.43', '0.35', '0.30', '0.44', '0.34', '0.39', '0.36', '0.45', '0.46', '0.45', '0.53', '0.37', '0.79', '0.37', '0.39', '0.37']	0.507729	['1.13', '1.17', '1.22', '1.19', '1.15', '1.17', '1.53', '1.70', '1.15', '0.93', '1.41', '1.35', '0.75', '0.62', '0.61', '1.43', '1.35', '1.28', '1.05', '1.85', '1.87', '1.00', '0.73', '1.71', '1.72', '1.69', '1.44', '1.19', '1.18', '1.20', '0.80', '1.24', '1.08', '0.87', '0.29', '1.07', '0.38', '0.75', '0.67', '1.45', '1.45', '1.48', '4.18', '2.63', '2.87', '3.43', '1.94', '2.27', '1.34', '1.06'…	1.28493	['1.08', '1.08', '1.14', '1.07', '1.34', '1.30', '1.04', '1.08', '0.86', '0.99', '0.99', '1.00', '1.15', '1.11', '1.04', '1.21', '1.23', '1.24', '0.78', '1.08', '1.02', '0.71', '0.63', '1.03', '1.10', '1.09', '1.02', '1.12', '1.18', '1.06', '3.34', '1.36', '1.23', '0.70', '1.05', '0.47', '0.99', '0.90', '0.74', '1.13', '1.13', '1.13', '1.63', '2.02', '4.60', '1.60', '1.84', '1.89', '0.38', '0.11'…	1.10396	['1.03', '1.01', '1.11', '1.02', '1.01', '1.02', '1.33', '1.20', '1.63', '1.18', '1.10', '0.98', '1.36', '1.56', '1.20', '1.01', '0.91', '0.93', '0.90', '1.02', '0.83', '0.56', '1.07', '0.96', '1.48', '1.49', '1.52', '1.78', '1.62', '1.72', '1.15', '0.78', '1.63']	1.14847
sp|B7UK21|RS11_ECO27	B7UK21	30S ribosomal protein S11 OS=Escherichia coli O127:H6 (strain E2348/69 / EPEC) GN=rpsK PE=3 SV=1	rpsK	0.98976	['0.40', '0.38', '0.74', '2.07', '2.36', '1.42', '0.57', '0.67', '0.73', '0.45', '0.83', '0.89', '0.69', '0.59', '0.69', '0.41', '0.27', '0.06', '0.33', '0.73', '1.90']	0.630383	['1.31', '1.33', '0.63', '1.73', '1.15', '1.27', '1.22', '1.19', '1.39', '3.13', '3.31', '2.02', '1.16', '1.39', '1.43', '1.29', '1.28', '1.16', '1.29', '1.35', '0.27', '2.61', '2.58', '2.19', '0.84', '0.82', '0.67', '2.58', '0.94', '0.79', '0.75', '0.62', '1.64']	1.267	['1.27', '1.16', '1.12', '0.94', '1.37', '0.68', '1.20', '1.42', '1.04', '0.83', '0.77', '0.76', '1.03', '0.88', '0.02', '1.22', '1.10', '0.42', '0.96', '0.96', '0.84', '1.79', '0.80', '0.87', '1.09', '1.10', '1.08']	0.86088	['1.78', '1.66', '1.99', '1.20', '1.24', '1.93', '1.23', '1.01', '1.12', '1.93', '1.96', '1.92', '1.71', '1.37', '7.27', '0.32', '0.41', '1.11', '0.76', '1.19', '1.17', '1.41', '2.00', '2.33']	1.39571
sp|A7ZSL7|RS12_ECO24	A7ZSL7	30S ribosomal protein S12 OS=Escherichia coli O139:H28 (strain E24377A / ETEC) GN=rpsL PE=3 SV=1	rpsL	0.986247	['0.56', '0.55', '0.58', '0.31', '1.47', '1.10', '0.84', '0.85', '0.75', '1.27', '1.58', '1.67']	0.860216	['0.73', '0.71', '0.76', '0.48', '0.47', '0.58', '0.84', '0.82', '0.65', '0.72', '0.68', '0.70', '2.18', '1.24', '1.44']	0.793215	['0.59', '0.62', '0.58', '0.93', '0.94', '0.43', '0.64', '0.65', '0.61', '0.68', '0.67', '0.76']	0.660483	['2.59', '2.73', '2.85', '2.38', '2.15', '1.30', '1.73', '1.79', '1.63', '2.76', '2.61', '2.54', '0.89', '3.36', '1.84']	2.09934
sp|B7UH58|RS16_ECO27	B7UH58	30S ribosomal protein S16 OS=Escherichia coli O127:H6 (strain E2348/69 / EPEC) GN=rpsP PE=3 SV=1	rpsP	1.01545	['1.07', '0.68', '0.23', '0.60', '0.24', '0.15', '0.39', '0.46', '0.42', '0.49', '0.40', '0.44', '0.31', '0.41', '0.55', '0.50', '0.55', '0.45', '0.49', '0.61', '0.61', '0.36', '0.34', '2.61', '0.40', '0.39', '0.66']	0.468318	['1.63', '0.80', '0.58', '1.23', '1.17', '1.07', '1.23', '1.22', '1.24', '1.71', '1.68', '1.69', '1.16', '1.35', '1.29', '3.46', '3.13', '2.71', '2.36', '2.09', '2.25', '2.31', '2.17', '2.24', '0.58', '1.08', '0.96', '0.86', '1.99', '0.93', '1.89', '1.91', '1.95', '1.92', '1.88', '1.89']	1.52086	['1.33', '1.34', '1.03', '1.63', '1.61', '1.59', '2.59', '1.86', '1.40', '1.26', '1.14', '1.24', '1.75', '1.48', '1.42', '1.47', '1.43', '1.36', '1.23', '1.30', '1.28', '1.55', '1.52', '1.58', '1.33', '1.28', '1.29', '1.28', '1.26', '1.27', '1.62', '0.99', '1.18', '0.85', '0.93', '0.83', '1.38', '1.38', '1.45', '1.05', '1.06', '1.04']	1.325	['0.66', '1.01', '1.12', '0.89', '0.55', '0.81', '1.55', '0.81', '0.66', '2.73', '1.60', '1.44', '1.48', '1.04', '1.69', '1.37', '1.45', '1.36', '0.77', '0.76', '0.66', '0.94', '1.00', '0.98', '1.06', '0.99', '1.07', '1.40', '1.65', '1.37', '0.75', '1.14', '1.07', '1.18', '2.19', '2.30']	1.12667
sp|A7ZSK0|RS17_ECO24	A7ZSK0	30S ribosomal protein S17 OS=Escherichia coli O139:H28 (strain E24377A / ETEC) GN=rpsQ PE=3 SV=1	rpsQ	0.825387	['0.43', '0.37', '0.47', '0.53', '0.49', '0.47', '0.76', '0.68', '0.65', '0.73', '0.61', '0.70']	0.559959	['0.74', '0.69', '0.72', '3.32', '3.15', '3.10', '1.46', '1.41', '1.45', '1.20', '1.06', '1.21', '1.33', '0.99', '1.09']	1.33673	['0.43', '1.30', '0.42', '0.79', '0.77', '0.78', '0.78', '0.86', '0.94', '0.73', '0.79', '0.76', '0.81', '0.81', '0.47']	0.733163	['0.65', '1.09', '1.45', '0.80', '1.05', '0.62', '0.73', '0.74', '0.84', '0.79', '0.96', '0.72']	0.845726
sp|B7UQL1|RS18_ECO27	B7UQL1	30S ribosomal protein S18 OS=Escherichia coli O127:H6 (strain E2348/69 / EPEC) GN=rpsR PE=3 SV=1	rpsR	1.2521	['0.60', '0.68', '0.59', '1.25', '0.92', '1.09', '0.83', '1.03', '0.75', '1.17', '1.23', '2.06', '2.54', '1.28', '2.34', '1.33', '1.18', '0.95']	1.10984	['1.29', '1.25', '1.26', '2.31', '1.90', '1.61', '2.12', '1.90', '2.04', '1.52', '1.56', '1.37', '1.17', '1.14', '1.18', '0.71', '1.65', '0.90', '0.48', '1.36', '1.16']	1.3418	['3.03', '2.72', '2.50', '1.22', '1.37', '1.48', '1.88', '1.48', '1.54', '2.96', '1.66', '0.50', '1.39', '1.35', '1.43', '0.67', '0.60', '0.34', '0.73', '0.65', '0.37', '1.60', '1.49', '1.44']	1.22113	['1.87', '1.93', '1.83', '1.09', '1.59', '1.19', '1.06', '1.04', '1.01', '1.14', '0.86', '1.03', '1.86', '1.84', '1.76']	1.35161
sp|A7ZSK5|RS19_ECO24	A7ZSK5	30S ribosomal protein S19 OS=Escherichia coli O139:H28 (strain E24377A / ETEC) GN=rpsS PE=3 SV=1	rpsS	0.967353	['0.56', '0.53', '0.74', '0.94', '1.16', '1.02']	0.790982	['1.49', '0.88', '0.78', '1.58', '1.07', '1.12', '0.85', '0.79', '0.45', '1.72', '1.76', '0.87', '1.49', '1.36', '1.47', '1.67', '1.50', '1.71', '1.33', '1.05', '1.74', '1.11', '1.11', '1.40', '0.87', '0.89', '0.87']	1.16185	['1.00', '0.92', '0.81', '0.91', '0.89', '0.91', '0.86', '0.87', '0.92', '0.90', '0.72', '0.97', '0.36', '0.36', '2.97', '0.54', '3.26', '0.60', '0.43', '0.39', '0.34', '0.48', '0.46', '0.45', '0.95', '0.89', '0.98', '0.90', '0.92', '0.90', '1.06', '1.22', '1.89', '0.89', '0.97', '0.92']	0.816024	['0.99', '1.05', '1.02', '2.40', '3.54', '0.72', '1.48', '1.10', '1.48', '0.72', '0.77', '2.11', '0.65', '0.85', '0.69', '0.86', '0.88', '1.57', '0.68', '1.29', '1.11', '2.25', '1.64', '1.40']	1.16767
sp|A7ZHB2|RS20_ECO24	A7ZHB2	30S ribosomal protein S20 OS=Escherichia coli O139:H28 (strain E24377A / ETEC) GN=rpsT PE=3 SV=1	rpsT	1.13077	['0.46', '1.54', '0.54', '0.43', '0.67', '0.43', '0.56', '0.51', '0.99', '0.49', '0.58', '0.34', '0.40', '0.54', '0.34', '1.03', '3.85', '8.21']	0.724736	['0.97', '1.38', '1.13', '0.93', '1.60', '1.65', '0.49', '0.49', '0.52', '1.38', '1.91', '0.99', '0.85', '0.80', '1.06', '1.08', '1.10', '1.11', '1.02', '0.91', '0.63', '2.11', '1.93', '1.73', '0.69', '0.74', '0.72']	1.02089	['1.70', '0.52', '0.59', '1.43', '1.05', '0.97', '4.19', '3.10', '7.43', '0.80', '0.67', '0.94', '0.91', '0.86', '1.38', '1.40', '1.39', '1.36', '1.53', '1.55', '1.00', '1.91', '1.57', '1.93', '1.19', '1.18', '1.16']	1.33449	['1.80', '1.40', '1.07', '2.74', '2.75', '2.78', '1.79', '1.53', '1.92', '1.44', '1.51', '1.41', '1.26', '1.59', '1.38', '1.91', '1.88', '1.72', '1.83', '1.86', '1.33', '1.82', '1.82', '2.59', '1.24', '1.07', '0.60', '2.99', '2.91', '3.15', '1.02', '0.91', '1.39']	1.65587
sp|A7ZRU7|RS21_ECO24	A7ZRU7	30S ribosomal protein S21 OS=Escherichia coli O139:H28 (strain E24377A / ETEC) GN=rpsU PE=3 SV=1	rpsU	0.974682	['0.64', '0.58', '0.52', '0.56', '0.59', '0.41', '0.56', '0.52', '0.65', '0.72', '0.89', '0.23']	0.54861	['1.27', '0.97', '0.45', '0.67', '0.93', '0.74', '0.74', '0.74', '0.73', '1.22', '1.18', '0.18', '1.09', '1.17', '0.94', '1.56', '1.48', '1.63', '5.18', '1.01', '0.49']	0.946098	['1.03', '1.00', '0.96', '0.80', '0.86', '0.85', '1.18', '1.23', '1.26', '0.98', '0.98', '0.92', '1.10', '1.71', '2.10', '0.82', '0.66', '0.82']	1.02726	['1.54', '1.75', '1.57', '1.44', '1.34', '1.38', '1.72', '1.72', '1.72', '1.67', '1.68', '1.07', '1.73', '1.91', '2.44', '2.17', '2.04', '2.11']	1.69266
sp|B7UIE8|SECA_ECO27	B7UIE8	Protein translocase subunit SecA OS=Escherichia coli O127:H6 (strain E2348/69 / EPEC) GN=secA PE=3 SV=1	secA	0.982066	['0.84', '0.81', '1.69', '0.57', '1.02', '3.05', '0.89', '0.77', '2.36', '0.70', '0.51', '0.23', '1.98', '0.76', '1.07', '1.44', '1.68', '1.41', '1.75', '1.17', '0.47', '0.57', '0.52', '0.97', '1.12', '1.18', '0.98', '2.13', '1.50', '0.96', '1.09', '0.22', '0.37', '0.98', '0.79', '0.91']	0.938225	['1.79', '4.56', '2.17', '0.69', '0.55', '0.41', '2.77', '2.88', '3.09', '0.82', '2.72', '1.78', '1.19', '0.89', '0.88', '1.08', '0.99', '0.50', '0.65', '0.21', '0.23', '2.36', '1.36', '1.26', '0.69', '0.89', '0.82', '0.79', '1.28', '1.18', '1.74', '1.00', '1.42', '1.16', '1.04', '1.43', '0.75', '0.77', '0.73', '0.79', '0.52', '0.79', '1.47', '2.11', '1.55', '1.56', '0.45', '0.65', '2.30', '5.48'…	1.1216	['0.52', '0.58', '1.33', '0.91', '0.58', '0.43', '4.17', '0.38', '0.27', '11.88', '1.23', '4.67', '1.91', '3.29', '3.98', '0.55', '0.48', '0.53', '1.78', '0.87', '2.02', '0.96', '1.15', '0.81', '1.76', '0.95', '0.83', '0.69', '0.87', '0.88', '0.40', '0.41', '0.37', '0.77', '0.53', '0.77', '0.73', '0.72', '0.58', '1.70', '1.00', '1.47', '0.75', '0.71', '1.00', '1.31', '1.25', '1.40']	0.977678	['0.53', '0.92', '0.37', '0.96', '0.97', '0.46', '0.70', '1.15', '1.00', '0.52', '0.60', '0.35', '0.94', '0.24', '1.17', '0.23', '0.27', '0.96', '1.26', '1.28', '1.27', '0.18', '0.35', '0.35', '1.15', '1.07', '1.02', '2.40', '0.72', '0.57', '1.84', '2.15', '9.61', '1.02', '1.13', '4.48', '0.66', '0.74', '0.71', '0.89', '1.25', '1.02', '1.46', '1.69', '1.58', '0.82', '1.08', '0.80', '1.81', '1.73'…	0.904113
sp|P0AFY8|SEQA_ECOLI	P0AFY8	Negative modulator of initiation of replication OS=Escherichia coli (strain K12) GN=seqA PE=1 SV=1	seqA	0.846657	['0.98', '1.15', '1.68', '0.43', '0.21', '0.35', '1.84', '1.06', '3.38', '1.54', '0.74', '1.03', '0.64', '0.57', '0.61']	0.85742	['0.85', '0.92', '0.62', '0.49', '0.49', '0.53', '0.78', '0.83', '0.66', '0.84', '0.65', '2.37', '0.28', '0.73', '0.65', '0.75', '0.72', '0.78', '1.36', '2.15', '0.89']	0.776768	['0.54', '0.78', '1.14', '0.82', '0.79', '0.80', '1.91', '1.30', '1.69', '0.80', '0.61', '0.78', '0.87', '0.97', '0.97', '0.77', '0.69', '5.04', '1.14', '0.89', '1.19', '0.30', '0.25', '0.28']	0.853508	['0.77', '0.79', '0.85', '2.20', '1.20', '1.39', '1.62', '0.81', '2.78', '0.74', '0.69', '0.37', '1.90', '1.60', '0.48', '2.73', '0.15', '0.11', '1.96', '0.94', '0.76']	0.903937
sp|P0A9T1|SERA_ECOL6	P0A9T1	D-3-phosphoglycerate dehydrogenase OS=Escherichia coli O6:H1 (strain CFT073 / ATCC 700928 / UPEC) GN=serA PE=3 SV=2	serA	0.830898	['0.61', '1.21', '0.92', '0.20', '0.24', '0.57']	0.513638	['1.27', '0.78', '1.65', '1.32', '1.05', '1.70', '1.09', '0.95', '1.36', '1.34', '1.34', '1.09']	1.21771	['0.43', '0.59', '0.51', '0.48', '0.51', '0.64']	0.522284	['5.16', '3.17', '2.99', '2.79', '1.98', '1.63', '2.91', '4.43', '3.02', '0.13', '0.26', '0.35', '1.95', '1.25', '1.21', '1.09', '1.01', '1.45']	1.45909
sp|P0AGB0|SERB_ECOLI	P0AGB0	Phosphoserine phosphatase OS=Escherichia coli (strain K12) GN=serB PE=1 SV=1	serB	0.900025			['1.31', '1.19', '1.10', '0.88', '0.76', '0.50']	0.910823	['1.38', '1.10', '1.02', '1.01', '0.39', '0.63', '0.81', '0.32', '0.35']	0.69057	['2.33', '1.26', '1.46', '1.14', '0.51', '1.16', '1.89', '1.40', '1.03', '1.11', '1.32', '1.45', '0.73', '1.16', '0.65']	1.1591
sp|P0ACA5|SSPA_ECO57	P0ACA5	Stringent starvation protein A OS=Escherichia coli O157:H7 GN=sspA PE=3 SV=2	sspA	0.800969	['0.25', '0.29', '0.36', '0.44', '0.45', '0.44', '0.48', '0.64', '0.78', '0.29', '0.27', '0.27', '0.57', '0.76', '0.51', '0.68', '0.55', '0.46', '0.50', '0.61', '0.60', '0.28', '0.49', '0.38', '1.14', '0.80', '0.37', '0.76', '0.46', '0.66', '0.47', '0.49', '0.50']	0.48273	['1.22', '0.89', '1.22', '0.68', '0.60', '0.74', '0.39', '0.52', '1.87', '0.79', '0.79', '1.13', '0.78', '2.02', '3.44', '0.60', '0.93', '0.62', '5.21', '4.74', '3.57', '1.42', '1.09', '0.68', '1.40', '1.14', '0.95', '0.85', '0.88', '0.77']	1.09721	['1.25', '0.57', '1.13', '0.45', '0.55', '0.58', '0.70', '0.65', '0.75', '0.49', '0.89', '0.74', '0.71', '0.54', '0.82', '0.51', '4.24', '6.08', '0.43', '1.30', '0.27', '0.43', '0.41', '0.50', '0.44', '0.50', '0.50', '0.79', '0.76', '0.68']	0.708078	['0.56', '0.62', '0.44', '0.68', '0.73', '0.62', '1.24', '1.00', '0.98', '1.30', '1.17', '4.35', '0.83', '13.55', '0.98', '0.58', '1.39', '0.85', '0.79', '1.75', '1.53', '1.66', '1.52', '1.75', '0.82', '0.73', '0.75']	1.09746
sp|P0AFG5|ODO1_ECO57	P0AFG5	2-oxoglutarate dehydrogenase E1 component OS=Escherichia coli O157:H7 GN=sucA PE=3 SV=1	sucA	1.15244	['1.35', '1.43', '1.30', '1.13', '1.21', '0.88', '0.49', '1.92', '0.68', '1.38', '0.81', '0.41', '0.69', '1.11', '1.20', '1.11', '1.37', '1.21', '1.67', '1.04', '2.54', '3.60', '1.24', '1.32', '1.15', '0.81', '0.99', '0.40', '0.29', '0.43', '1.18', '1.51', '0.77', '1.20', '0.90', '1.27', '1.66', '1.45', '0.47', '1.11', '1.04', '2.42', '1.68', '0.29', '1.24']	1.04208	['3.40', '3.98', '2.27', '1.44', '1.82', '1.34', '1.87', '1.96', '2.02', '1.36', '0.94', '1.26', '3.60', '5.76', '1.69', '0.23', '0.64', '0.51', '0.75', '0.70', '0.70', '3.40', '2.08', '1.96', '0.16', '0.50', '0.25', '0.46', '1.68', '1.17', '1.24', '1.21', '1.37', '1.23', '1.30', '0.69', '1.17', '3.21', '8.56', '1.82', '1.03', '1.05', '1.24', '1.52', '2.01', '1.56', '1.15', '0.70', '2.36', '1.98'…	1.36573	['1.48', '0.48', '2.18', '1.68', '0.71', '1.48', '2.80', '2.88', '2.07', '0.22', '0.36', '0.58', '0.63', '0.64', '0.68', '0.57', '8.56', '3.48', '0.60', '0.50', '0.50', '0.44', '0.65', '0.97', '0.89', '0.70', '0.83', '1.02', '1.67', '1.52', '0.84', '0.88', '0.66', '0.74', '0.87', '0.73', '1.33', '0.81', '2.63', '1.05', '1.46', '1.14', '0.03', '0.03', '0.16', '1.02', '12.12', '17.01', '0.75', '14.…	0.93902	['0.87', '0.91', '0.63', '2.05', '2.99', '2.14', '1.37', '1.44', '0.81', '1.25', '1.52', '1.46', '1.32', '1.50', '0.97', '1.47', '0.97', '0.93', '1.75', '1.18', '1.61', '1.19', '1.04', '0.63', '1.46', '1.45', '1.18', '1.76', '2.57', '1.71', '1.79', '1.31', '1.12', '1.74', '2.53', '2.39', '1.16', '1.35', '2.58', '1.60', '1.37', '1.45', '1.39', '1.23', '1.19', '1.10', '1.16', '1.58', '2.99', '3.01'…	1.3199
sp|P0AFG6|ODO2_ECOLI	P0AFG6	Dihydrolipoyllysine-residue succinyltransferase component of 2-oxoglutarate dehydrogenase complex OS=Escherichia coli (strain K12) GN=sucB PE=1 SV=2	sucB	1.04524	['2.19', '3.06', '3.35', '1.02', '1.10', '1.82', '1.31', '1.52', '1.57', '0.90', '1.07', '0.88', '2.51', '1.49', '1.45', '2.91', '2.69', '1.41', '2.30', '2.48', '2.01', '1.22', '1.72', '1.96', '1.63', '1.11', '0.82', '1.05', '1.76', '1.36', '0.68', '0.65', '0.57', '0.74', '0.44', '0.51', '2.88', '0.63', '0.59', '2.36', '1.87', '1.13']	1.34806	['1.68', '1.86', '1.35', '0.59', '0.46', '0.67', '2.25', '3.27', '1.38', '0.69', '0.96', '0.47', '1.94', '1.38', '1.47', '1.78', '1.45', '0.96', '1.32', '1.39', '0.83', '1.37', '1.61', '1.29', '1.27', '1.86', '1.45', '1.32', '1.48', '1.35', '1.07', '1.11', '1.17', '1.39', '1.60', '1.16', '0.19', '0.05', '0.10', '0.72', '1.04', '1.01', '1.09', '2.54', '1.18', '1.13', '1.82', '0.75', '1.99', '0.94'…	1.17272	['0.48', '0.56', '0.54', '3.78', '0.57', '0.54', '0.89', '2.24', '0.26', '0.38', '0.23', '0.32', '0.98', '0.25', '0.46', '1.49', '1.57', '0.47', '1.42', '1.55', '1.65', '1.24', '1.39', '1.32', '0.55', '0.44', '0.51', '0.89', '0.93', '0.91', '1.08', '1.56', '0.76', '1.08', '1.24', '0.91', '0.21', '0.08', '0.49', '1.59', '0.98', '1.07', '1.21', '1.18', '0.67', '1.72', '1.38', '0.92', '0.27', '0.31'…	0.770365	['1.26', '1.29', '1.41', '1.74', '1.87', '1.86', '1.04', '0.11', '0.72', '2.86', '0.84', '0.85', '0.91', '0.60', '0.44', '0.54', '0.04', '0.14', '2.09', '2.59', '1.97', '0.57', '2.21', '1.84', '1.46', '1.22', '1.14', '1.31', '1.28', '1.20', '2.07', '1.89', '2.37', '0.25', '3.92', '2.16', '1.66', '1.06', '1.02', '1.25', '0.97', '0.03', '1.70', '1.76', '1.68', '1.35', '1.10', '1.32', '2.03', '1.85'…	0.980095
sp|B7LAD4|SUCC_ECO55	B7LAD4	Succinyl-CoA ligase [ADP-forming] subunit beta OS=Escherichia coli (strain 55989 / EAEC) GN=sucC PE=3 SV=1	sucC	1.01632	['2.23', '1.88', '1.57', '2.50', '3.47', '2.67', '2.43', '5.32', '2.18', '1.58', '1.81', '0.59', '0.57', '1.57', '0.20', '1.62', '1.85', '1.23', '0.74', '1.23', '0.22', '1.49', '0.75', '12.34', '0.20', '0.12', '0.24', '1.46', '1.24', '1.24', '1.47', '1.00', '1.54', '1.18', '1.89', '2.05', '2.35', '2.25', '2.10', '4.06', '1.83', '2.53', '1.67', '1.40', '0.74', '1.15', '2.47', '0.82', '4.38', '5.65…	1.42188	['0.91', '1.34', '0.87', '1.25', '1.21', '1.11', '0.86', '0.73', '0.64', '0.66', '0.67', '0.31', '0.87', '0.92', '0.63', '0.69', '0.71', '1.15', '1.61', '0.90', '1.51', '1.16', '1.24', '1.21', '0.63', '1.75', '0.91', '1.07', '1.35', '1.39', '1.12', '1.16', '0.70', '0.83', '1.73', '1.07', '0.50', '0.63', '0.48', '1.76', '1.51', '1.35', '1.47', '1.30', '0.97', '2.50', '0.71', '0.32', '0.48', '0.61'…	1.104	['1.04', '1.33', '1.16', '0.93', '1.04', '0.55', '0.83', '0.65', '0.60', '0.78', '0.77', '1.05', '0.37', '0.50', '0.37', '0.69', '1.00', '1.13', '0.38', '0.44', '0.52', '0.71', '0.47', '0.87', '0.88', '2.49', '4.85', '0.91', '1.15', '0.56', '0.26', '0.55', '1.51', '0.88', '0.14', '0.51', '0.57', '0.55', '0.49', '0.76', '0.81', '0.58', '0.67', '0.64', '0.92', '0.38', '0.15', '0.51', '1.18', '1.08'…	0.685262	['1.13', '1.19', '1.41', '0.70', '1.48', '1.45', '1.11', '1.06', '1.08', '1.13', '1.06', '1.37', '0.49', '0.25', '0.34', '1.12', '1.28', '0.85', '1.17', '1.46', '1.39', '0.95', '1.05', '0.95', '2.08', '1.08', '1.30', '0.46', '0.89', '0.29', '2.05', '0.64', '1.93', '0.94', '0.73', '0.72', '1.17', '2.02', '1.57', '1.06', '1.86', '6.12', '0.72', '0.50', '1.14', '2.11', '1.58', '1.89', '1.88', '1.97'…	0.991837
sp|P0AGF0|SUCD_ECOL6	P0AGF0	Succinyl-CoA ligase [ADP-forming] subunit alpha OS=Escherichia coli O6:H1 (strain CFT073 / ATCC 700928 / UPEC) GN=sucD PE=3 SV=2	sucD	1.02281	['1.52', '1.21', '1.55', '2.99', '2.63', '3.08', '0.65', '0.62', '0.63', '0.65', '0.68', '0.81', '1.46', '1.40', '1.20', '0.90', '1.92', '1.11', '1.71', '1.46', '1.71', '2.05', '3.88', '2.82', '1.26', '1.36', '0.86', '1.19', '1.29', '0.71', '2.01', '2.32', '2.24', '1.22', '0.74', '0.76', '1.29', '1.25', '1.02', '0.84', '1.26', '0.63', '1.06', '1.19', '1.80', '1.37', '0.90', '0.93']	1.26921	['0.74', '1.24', '1.29', '0.82', '0.84', '0.77', '0.93', '0.53', '0.81', '1.25', '1.21', '1.18', '0.50', '0.54', '0.51', '0.53', '0.53', '0.96', '0.99', '1.08', '1.12', '0.96', '0.96', '0.79', '0.55', '0.23', '0.25', '3.47', '1.27', '2.85', '1.46', '1.24', '1.60', '9.04', '5.38', '12.87', '6.07', '1.86', '1.24', '0.94', '0.84', '0.57', '1.26', '1.12', '1.15', '1.08', '1.18', '1.53', '1.67', '0.98…	1.25161	['0.66', '0.79', '0.49', '0.99', '1.41', '8.58', '0.77', '0.52', '0.47', '0.60', '0.53', '0.45', '1.66', '2.49', '2.20', '1.15', '0.57', '0.64', '0.45', '0.48', '0.48', '0.27', '0.13', '0.18', '0.21', '0.22', '0.26', '1.02', '0.39', '0.56', '0.37', '0.48', '0.45', '0.59', '0.39', '0.82', '0.40', '0.31', '0.27', '0.48', '0.46', '0.51', '0.27', '0.22', '0.19', '0.47', '0.41', '0.33', '1.00', '0.48'…	0.5517	['2.08', '2.42', '1.51', '1.00', '1.09', '1.18', '8.27', '2.17', '2.89', '1.11', '1.35', '0.90', '1.40', '1.06', '1.11', '2.50', '2.02', '1.94', '2.43', '2.20', '2.24', '3.95', '3.36', '4.32', '1.03', '0.85', '1.05', '0.58', '0.54', '0.70', '0.46', '0.41', '0.53', '1.26', '0.66', '0.19', '0.99', '0.99', '0.93', '0.47', '0.78', '0.57', '1.48', '1.93', '0.44', '1.42', '1.47', '1.79', '1.23', '1.24'…	1.24876
sp|A7ZME4|SUFE_ECO24	A7ZME4	Cysteine desulfuration protein SufE OS=Escherichia coli O139:H28 (strain E24377A / ETEC) GN=sufE PE=3 SV=1	sufE	0.822382			['0.75', '1.02', '0.90', '0.36', '0.57', '0.25']	0.570571	['0.55', '0.74', '0.67', '1.13', '3.70', '1.09', '1.35', '2.94', '0.93']	1.18532
sp|Q8FLD1|TALB_ECOL6	Q8FLD1	Transaldolase B OS=Escherichia coli O6:H1 (strain CFT073 / ATCC 700928 / UPEC) GN=talB PE=3 SV=3	talB	0.853125	['0.92', '1.05', '0.99', '0.72', '0.73', '0.68', '0.38', '2.60', '1.86', '0.62', '0.81', '0.99', '0.55', '0.68', '0.54', '1.18', '1.20', '1.28', '0.68', '0.63', '0.61', '1.40', '1.30', '1.10', '0.71', '0.70', '0.62', '1.41', '1.64', '2.06', '1.86', '1.84', '2.35', '1.22', '1.22', '1.11', '1.06', '1.06', '1.02', '4.36', '0.48', '0.23', '1.20', '1.14', '0.90', '1.01', '0.98', '0.96', '0.99', '1.05'…	0.857182	['0.61', '0.67', '0.89', '1.21', '1.17', '1.16', '1.04', '0.59', '1.82', '0.81', '0.68', '0.80', '1.12', '1.06', '1.19', '0.97', '0.77', '0.91', '0.68', '0.72', '0.60', '0.53', '0.55', '0.59', '1.75', '1.83', '1.56', '0.91', '0.94', '0.96', '0.57', '0.59', '0.62', '0.63', '0.74', '1.10', '1.36', '4.41', '3.58', '0.73', '0.65', '0.55', '1.51', '1.59', '2.53', '4.40', '4.29', '4.16', '4.82', '6.33'…	0.957744	['0.88', '0.89', '0.75', '0.42', '0.57', '0.46', '0.71', '0.82', '1.29', '0.50', '0.62', '1.35', '0.81', '0.80', '0.89', '0.72', '0.60', '0.72', '0.49', '0.74', '0.66', '0.30', '0.32', '0.29', '0.18', '1.07', '2.24', '0.59', '0.64', '0.67', '0.59', '0.57', '0.59', '0.55', '0.51', '1.21', '0.70', '0.67', '0.52', '0.71', '0.41', '0.50', '0.58', '0.40', '0.50', '0.50', '0.55', '0.47', '0.60', '0.59'…	0.603149	['0.87', '1.13', '1.28', '1.16', '1.02', '1.35', '8.07', '4.77', '2.88', '2.31', '2.27', '1.79', '1.23', '1.13', '1.04', '0.86', '0.77', '0.89', '0.94', '1.23', '1.00', '0.95', '1.09', '1.30', '1.66', '1.64', '1.58', '1.16', '0.66', '0.62', '0.92', '0.87', '0.88', '0.89', '0.90', '1.01', '1.09', '1.06', '0.99', '1.25', '1.30', '1.13', '2.21', '2.65', '2.15', '1.24', '2.22', '2.58', '1.49', '1.04'…	1.0698
sp|P00561|AK1H_ECOLI	P00561	Bifunctional aspartokinase/homoserine dehydrogenase 1 OS=Escherichia coli (strain K12) GN=thrA PE=1 SV=2	thrA	0.823586	['1.37', '1.00', '0.66', '0.32', '0.31', '0.35', '1.24', '1.15', '0.86', '0.43', '0.58', '0.38']	0.62586	['0.47', '0.62', '0.25', '2.17', '2.30', '1.48', '0.90', '1.15', '1.42', '0.89', '1.02', '1.56']	1.0101	['0.35', '0.44', '1.10', '0.52', '0.75', '0.63', '1.35', '0.87', '0.59', '0.78', '1.07', '0.66', '1.48', '1.21', '1.34', '0.72', '0.49', '0.25']	0.727814	['0.73', '0.73', '0.48', '1.88', '1.04', '0.88', '1.26', '1.28', '1.31', '2.00', '1.08', '0.59', '1.48', '1.22', '1.66', '1.22', '0.93', '0.83', '0.61', '0.90', '0.85', '1.04', '0.83', '0.76']	0.999934
sp|B7USA2|SYT_ECO27	B7USA2	Threonine--tRNA ligase OS=Escherichia coli O127:H6 (strain E2348/69 / EPEC) GN=thrS PE=3 SV=1	thrS	0.85	['0.86', '0.52', '1.39', '0.90', '0.70', '0.84', '0.52', '0.60', '0.86', '0.62', '0.77', '1.03', '0.67', '0.60', '0.68', '0.78', '0.68', '0.71', '0.52', '0.45', '0.31', '0.32', '0.91', '1.23', '0.42', '0.37', '0.33', '0.48', '0.53', '0.48', '1.52', '0.63', '0.66', '0.44', '0.63', '0.44', '1.15', '3.87', '1.44', '0.68', '0.50', '0.39', '0.54', '1.12', '0.37', '0.36', '0.62', '1.72', '0.42', '0.74'…	0.636557	['0.18', '0.87', '0.29', '1.12', '1.38', '2.01', '1.46', '1.29', '1.28', '1.51', '1.30', '1.03', '4.83', '3.14', '1.97', '0.55', '0.57', '1.34', '1.25', '1.81', '0.98', '0.80', '0.97', '0.65', '1.28', '1.49', '0.85', '0.44', '0.63', '0.82', '0.35', '0.36', '1.56', '0.60', '0.81', '0.73', '0.87', '2.40', '0.95', '0.59', '0.70', '0.61', '5.38', '0.50', '0.44', '0.75', '0.97', '1.98', '0.97', '0.63'…	0.935673	['1.82', '0.42', '0.30', '1.23', '1.86', '0.67', '1.01', '0.85', '0.46', '0.66', '0.54', '1.73', '1.22', '0.86', '1.61', '1.45', '0.77', '1.55', '0.62', '0.60', '0.54', '0.53', '0.61', '0.55', '0.20', '0.57', '0.57', '0.47', '0.78', '0.65', '0.88', '1.61', '0.87', '0.94', '1.67', '0.73', '0.94', '0.32', '0.80', '0.55', '0.61', '0.71', '0.83', '0.74', '0.95', '0.49', '0.52', '0.50', '0.82', '0.40'…	0.745024	['0.53', '0.60', '0.79', '0.89', '0.94', '0.84', '0.64', '2.56', '1.22', '1.69', '1.59', '2.06', '0.83', '1.19', '1.71', '1.34', '1.26', '0.85', '1.58', '1.21', '2.26', '1.96', '1.27', '1.97', '2.95', '2.20', '2.37', '1.88', '1.30', '1.10', '0.94', '0.89', '0.92', '1.46', '1.20', '1.18', '1.10', '0.69', '0.60', '0.98', '0.44', '0.75', '1.16', '0.68', '0.23', '1.81', '1.66', '1.09', '1.08', '1.15'…	1.17637
sp|B7UJQ9|TIG_ECO27	B7UJQ9	Trigger factor OS=Escherichia coli O127:H6 (strain E2348/69 / EPEC) GN=tig PE=3 SV=1	tig	0.748429	['0.51', '0.48', '0.49', '0.89', '0.89', '1.15', '0.64', '0.60', '0.95', '0.19', '0.24', '0.42', '1.36', '0.85', '1.55', '0.37', '0.26', '0.39', '0.49', '0.46', '0.45', '0.51', '0.50', '0.49', '1.04', '0.86', '0.73', '0.54', '0.54', '0.44', '0.58', '0.58', '0.65', '0.62', '0.70', '0.79', '0.63', '1.20', '0.83', '0.65', '0.31', '0.26', '1.50', '1.13', '0.74', '0.35', '0.20', '0.62', '0.53', '0.66'…	0.592573	['0.56', '0.53', '0.67', '1.02', '1.72', '1.56', '1.00', '0.91', '1.13', '0.68', '0.58', '0.89', '0.78', '0.42', '1.32', '0.84', '0.75', '1.23', '1.21', '0.69', '0.71', '0.89', '1.03', '0.72', '0.53', '0.52', '0.56', '1.10', '0.90', '1.44', '0.70', '0.69', '0.68', '1.45', '1.05', '0.90', '0.84', '0.85', '0.83', '0.51', '0.52', '0.72', '1.03', '1.14', '1.33', '0.57', '0.61', '0.59', '1.02', '0.27'…	0.879987	['0.26', '0.34', '0.28', '0.65', '0.48', '1.54', '0.50', '0.45', '0.74', '0.28', '0.29', '0.40', '1.02', '1.55', '1.25', '0.87', '0.86', '0.76', '0.44', '0.52', '0.46', '0.52', '0.52', '0.51', '0.56', '1.01', '0.85', '1.02', '0.44', '1.01', '0.47', '0.49', '0.49', '2.02', '0.88', '0.91', '3.90', '2.94', '2.29', '0.32', '0.31', '0.40', '0.77', '0.80', '2.00', '0.45', '0.47', '0.42', '1.26', '1.11'…	0.551049	['1.28', '1.29', '1.39', '0.81', '0.75', '0.97', '1.43', '1.45', '1.46', '3.92', '13.16', '2.15', '1.78', '1.22', '1.55', '10.45', '1.34', '1.20', '0.74', '1.17', '1.78', '0.22', '0.09', '0.49', '0.96', '1.05', '0.96', '3.68', '4.10', '1.17', '0.79', '0.75', '1.00', '0.34', '1.69', '0.56', '1.27', '1.27', '1.24', '1.14', '1.23', '1.04', '1.58', '0.61', '0.45', '0.84', '0.90', '0.78', '0.82', '0.8…	1.09193
sp|P27302|TKT1_ECOLI	P27302	Transketolase 1 OS=Escherichia coli (strain K12) GN=tktA PE=1 SV=5	tktA	0.737383	['0.88', '0.86', '0.86', '0.44', '0.41', '0.47', '0.44', '0.45', '0.30', '0.80', '0.87', '1.16', '1.73', '1.54', '3.76', '0.72', '0.61', '3.20', '0.43', '0.51', '1.29', '1.10', '0.62', '6.47', '0.29', '0.32', '0.21', '0.95', '2.32', '0.60', '0.82', '0.64', '0.82', '0.63', '0.60', '0.73', '0.49', '0.49', '0.35', '0.44', '0.67', '0.43', '0.73', '0.67', '0.73', '0.79', '0.86', '1.82', '0.60', '0.62'…	0.729989	['0.54', '0.54', '0.55', '1.32', '2.60', '1.17', '0.77', '0.74', '1.01', '0.68', '0.51', '0.67', '0.95', '0.82', '0.95', '2.54', '0.38', '0.90', '0.44', '0.44', '1.75', '1.76', '0.48', '2.20', '0.91', '0.63', '0.95', '0.33', '0.37', '0.67', '0.45', '0.55', '0.77', '0.31', '0.43', '1.23', '0.51', '0.69', '0.42', '2.40', '2.44', '1.13', '2.07', '1.90', '1.61', '0.54', '0.54', '0.55', '0.30', '0.75'…	0.798045	['1.06', '1.06', '0.94', '0.64', '0.59', '1.01', '0.54', '0.55', '0.50', '0.55', '0.57', '0.55', '0.59', '0.59', '1.14', '1.15', '1.39', '1.28', '0.28', '1.71', '0.40', '0.47', '0.54', '0.47', '0.55', '0.55', '0.68', '0.29', '0.28', '0.31', '0.44', '0.42', '0.39', '0.60', '0.63', '0.57', '0.54', '0.28', '0.78', '0.51', '0.66', '10.20', '0.58', '0.71', '0.56', '0.59', '0.33', '0.11', '0.17', '0.28…	0.587963	['0.67', '0.61', '0.67', '1.10', '0.71', '0.62', '0.86', '0.90', '1.14', '0.76', '0.82', '0.71', '1.07', '1.28', '0.76', '0.93', '0.81', '0.87', '0.30', '0.51', '0.69', '1.11', '1.21', '0.86', '0.93', '0.94', '1.01', '0.67', '0.61', '0.86', '0.94', '1.34', '1.14', '0.87', '0.83', '0.77', '0.96', '0.98', '0.95', '1.24', '1.14', '1.19', '1.41', '1.27', '1.27', '1.20', '1.15', '1.13', '0.74', '0.99'…	0.863135
sp|P33570|TKT2_ECOLI	P33570	Transketolase 2 OS=Escherichia coli (strain K12) GN=tktB PE=1 SV=1	tktB	1.05601	['0.88', '0.86', '0.86', '0.81', '3.04', '1.23', '2.45', '3.60', '0.92', '0.67', '1.28', '0.59', '1.25', '2.47', '3.69', '1.27', '2.59', '1.05', '0.93', '0.62', '1.66', '1.26', '1.20', '2.19', '1.39', '1.17', '0.61', '0.59', '2.38', '2.45', '0.48', '0.69', '0.98', '0.42', '1.05', '1.41', '2.27', '2.43', '2.25', '1.20', '0.73', '1.25', '1.06', '1.19', '0.68']	1.22188	['0.54', '0.54', '0.55', '1.32', '2.60', '1.17', '0.95', '0.25', '1.47', '2.57', '2.40', '1.83', '1.24', '1.91', '1.58', '0.79', '0.70', '1.75', '1.26', '3.99', '1.25', '1.24', '4.33', '4.25', '0.96', '0.57', '0.86', '0.66', '0.59', '0.41', '0.53', '0.57', '0.54', '0.60', '0.49', '0.63', '3.13', '4.71', '5.04', '3.24', '4.33', '4.92', '0.63', '0.98', '1.00', '0.26', '0.43', '0.37', '0.87', '1.52'…	1.20183	['1.06', '1.06', '0.94', '0.17', '0.37', '0.17', '0.53', '0.77', '0.66', '0.40', '0.70', '0.70', '0.89', '0.82', '1.17', '3.66', '2.29', '1.97', '0.98', '0.73', '0.69', '2.02', '1.72', '44.04', '1.16', '2.07', '134.61', '1.45', '1.76', '1.31', '0.34', '0.22', '0.10', '0.74', '0.64', '0.39', '0.66', '0.62', '0.54', '0.83', '1.42', '0.95', '1.20', '1.25', '1.57', '0.40', '0.68', '0.63', '0.65', '0.…	0.914847	['1.10', '0.71', '0.62', '0.39', '0.44', '0.49', '0.46', '1.11', '0.82', '1.18', '0.94', '0.71', '1.91', '1.92', '0.31', '0.35', '0.21', '0.56', '1.34', '1.88', '1.17', '2.46', '2.02', '2.29', '1.40', '0.64', '0.55', '0.84', '6.61', '1.51', '1.40', '0.31', '1.67', '0.84', '1.33', '2.01', '1.37', '1.18', '1.43', '3.09', '0.58', '1.27', '0.57', '0.87', '1.20', '1.24', '0.98', '1.27', '0.29', '1.06'…	0.925673
sp|P06612|TOP1_ECOLI	P06612	DNA topoisomerase 1 OS=Escherichia coli (strain K12) GN=topA PE=1 SV=2	topA	0.905331	['1.07', '1.33', '0.99', '0.71', '0.42', '0.21']	0.667009	['1.95', '2.99', '1.04', '0.75', '0.93', '0.78', '0.59', '0.53', '0.49', '1.01', '0.88', '0.80', '1.00', '0.83', '1.33', '5.14', '4.13', '1.14', '0.71', '0.74', '0.75', '1.12', '0.65', '0.28', '0.93', '0.37', '0.45', '15.20', '5.33', '3.04', '1.87', '1.13', '1.00', '0.56', '0.28', '0.33', '1.11', '0.66', '0.92', '0.58', '0.54', '0.13', '0.85', '1.31', '1.58', '1.27', '1.00', '1.07', '0.62', '0.78…	0.986865	['0.42', '0.86', '0.54', '1.04', '2.68', '1.30', '1.29', '1.35', '2.60', '1.64', '5.05', '1.80', '0.35', '0.45', '0.41', '0.50', '1.35', '1.19', '0.46', '0.25', '0.83', '0.92', '0.88', '0.92', '0.83', '0.90', '1.35', '3.25', '1.05', '3.33', '0.29', '0.23', '0.28']	0.90502	['1.54', '0.27', '1.49', '1.33', '2.74', '3.79', '1.05', '1.44', '0.99', '0.61', '0.60', '0.18', '0.71', '1.47', '1.30', '0.89', '0.59', '0.73', '3.72', '13.71', '91.24', '0.45', '0.39', '0.61', '1.08', '0.86', '0.86', '1.41', '0.87', '0.92', '0.87', '1.04', '0.93', '1.26', '0.55', '2.03', '0.91', '0.70', '0.87', '1.47', '1.12', '1.28', '1.43', '1.50', '0.78', '1.86', '1.09', '1.40', '0.74', '2.0…	1.12767
sp|B7MI51|TPIS_ECO45	B7MI51	Triosephosphate isomerase OS=Escherichia coli O45:K1 (strain S88 / ExPEC) GN=tpiA PE=3 SV=1	tpiA	0.782213	['0.44', '0.11', '0.39', '0.41', '0.39', '0.33', '0.39', '0.42', '0.41', '0.55', '0.58', '0.54', '1.12', '0.43', '0.66', '0.56', '0.79', '0.70', '0.88', '0.85', '1.00', '0.72', '0.71', '0.63', '0.67', '0.67', '0.65', '1.20', '1.34', '1.35', '0.66', '0.62', '0.49', '0.74', '0.43', '0.35', '0.61', '0.61', '0.59', '0.48', '0.61', '0.57', '0.71', '0.74', '0.78', '0.83', '0.82', '0.80', '1.53', '1.42'…	0.644134	['0.57', '0.30', '0.73', '0.84', '0.64', '2.33', '0.71', '0.62', '0.64', '0.92', '0.63', '0.72', '1.09', '1.12', '1.12', '1.19', '1.22', '1.18', '0.53', '0.66', '1.57', '1.38', '1.20', '1.42', '0.82', '0.62', '0.34', '1.11', '1.27', '1.29', '0.93', '2.40', '3.51', '1.30', '2.02', '0.78', '2.17', '1.74', '2.11', '1.55', '2.56', '1.20', '3.26', '2.35', '2.81', '7.03', '5.31', '6.15', '0.41', '0.17'…	1.00455	['1.24', '0.49', '0.91', '0.82', '0.89', '0.62', '0.25', '0.27', '0.29', '0.37', '0.51', '0.64', '0.54', '1.17', '1.39', '0.35', '0.38', '0.36', '0.47', '0.44', '0.49', '1.37', '0.54', '0.97', '3.04', '1.77', '1.51', '0.40', '0.38', '0.51', '0.75', '0.76', '0.80', '0.55', '0.81', '0.45', '0.38', '0.42', '0.40', '0.44', '0.42', '0.45', '0.39', '0.35', '0.37', '0.48', '0.49', '0.50', '0.41', '0.33'…	0.559898	['1.03', '1.34', '8.41', '0.46', '0.33', '0.95', '2.11', '2.69', '0.99', '0.60', '0.58', '1.03', '1.50', '1.27', '1.39', '1.28', '1.25', '1.18', '1.19', '0.90', '1.35', '0.99', '0.85', '1.08', '1.14', '0.98', '1.20', '0.97', '1.16', '1.07', '0.29', '0.39', '1.78', '0.55', '0.68', '0.78', '0.52', '0.72', '3.76', '1.31', '1.28', '1.19', '1.20', '1.24', '1.61', '1.05', '0.95', '0.96', '1.05', '1.00'…	1.03334
sp|P0A864|TPX_ECO57	P0A864	Thiol peroxidase OS=Escherichia coli O157:H7 GN=tpx PE=3 SV=2	tpx	1.08815	['0.83', '0.79', '0.82', '1.19', '1.10', '1.03', '1.40', '1.38', '1.15', '0.85', '1.23', '0.80', '1.41', '1.45', '1.54', '1.43', '1.34', '1.09', '2.99', '0.76', '0.69', '1.03', '1.09', '0.96', '1.79', '3.10', '1.61', '1.11', '1.14', '1.20', '1.11', '1.05', '1.08', '1.21', '1.18', '1.17', '1.31', '1.28', '0.99', '0.52', '0.65', '0.75', '1.67', '1.59', '1.59', '2.00', '1.89', '1.82']	1.19564	['1.95', '1.84', '1.76', '1.46', '1.39', '1.33', '1.16', '1.42', '1.15', '1.54', '1.41', '1.57', '2.07', '2.08', '2.22', '1.89', '2.08', '2.06', '1.65', '0.69', '6.13', '0.81', '1.28', '0.94', '2.23', '2.18', '2.19', '2.03', '2.23', '2.12', '2.33', '2.31', '2.32', '1.73', '1.68', '1.60', '1.54', '1.70', '1.60', '2.65', '2.62', '2.62', '2.85', '2.19', '2.25', '0.52', '0.79', '0.93', '1.20', '1.39'…	1.67037	['0.61', '0.62', '0.57', '0.76', '0.75', '0.78', '0.72', '0.77', '0.67', '0.90', '0.98', '1.03', '0.14', '0.23', '0.69', '1.06', '1.11', '1.04', '1.12', '1.03', '1.29', '0.26', '0.21', '0.92', '1.02', '0.98', '1.04', '0.85', '0.62', '0.61', '0.56', '0.49', '0.48', '0.71', '0.60', '0.56', '0.89', '0.46', '0.61', '0.23', '0.70', '0.55', '0.34', '0.59', '0.49', '0.70', '0.79', '0.86', '0.80', '0.72'…	0.674133	['1.06', '1.08', '1.03', '0.89', '0.90', '0.96', '1.05', '1.62', '0.91', '0.93', '0.93', '0.96', '1.22', '1.19', '1.25', '1.24', '1.18', '1.76', '1.14', '1.30', '1.08', '0.95', '0.90', '0.81', '0.87', '0.75', '0.74', '1.17', '1.14', '1.11', '1.10', '1.08', '1.04', '1.05', '1.13', '1.05', '1.02', '1.07', '1.01', '1.42', '1.31', '1.47', '0.93', '0.96', '0.95', '0.87', '0.95', '0.89', '0.41', '0.77'…	1.04135
sp|B7UFX6|TRUA_ECO27	B7UFX6	tRNA pseudouridine synthase A OS=Escherichia coli O127:H6 (strain E2348/69 / EPEC) GN=truA PE=3 SV=1	truA	0.797582			['1.12', '1.13', '0.56']	0.890414			['0.93', '0.66', '0.59']	0.714429
sp|P0AA26|THIO_ECOL6	P0AA26	Thioredoxin-1 OS=Escherichia coli O6:H1 (strain CFT073 / ATCC 700928 / UPEC) GN=trxA PE=3 SV=2	trxA	1.12064	['1.28', '0.73', '1.24', '2.72', '2.71', '0.99', '1.44', '1.45', '4.28', '0.71', '0.53', '0.56', '0.60', '0.69', '0.57', '0.83', '0.80', '0.79', '0.68', '0.73', '0.68', '0.59', '0.66', '0.47', '0.92', '0.51', '0.85', '1.06', '1.30', '1.42', '0.77', '2.03', '0.83', '0.78', '0.81', '0.84', '0.24', '0.85', '0.57', '0.75', '0.77', '0.71', '0.68', '0.56', '0.66', '0.28', '0.67', '0.35']	0.814484	['1.45', '1.93', '1.83', '1.91', '1.48', '1.28', '1.54', '1.44', '1.51', '1.24', '1.25', '1.19', '1.77', '1.75', '1.78', '1.01', '1.04', '1.01', '1.78', '1.84', '1.80', '1.66', '1.39', '1.30', '0.95', '0.94', '0.39', '1.34', '1.67', '2.25', '0.86', '2.37', '3.28', '1.24', '1.24', '1.21', '1.08', '1.62', '1.63', '1.16', '1.15', '1.12', '2.63', '2.68', '2.21', '1.41', '1.80', '2.45', '1.40', '1.41'…	1.46641	['1.45', '1.67', '0.89', '1.29', '1.31', '1.33', '1.01', '1.45', '1.17', '0.89', '0.90', '0.87', '1.00', '1.04', '0.97', '0.63', '0.29', '0.28', '1.02', '0.98', '1.87', '0.79', '0.81', '0.80', '0.99', '0.94', '0.97', '1.21', '1.14', '1.21', '1.29', '1.02', '1.27', '0.72', '0.52', '0.53', '0.66', '0.61', '0.56', '1.23', '1.01', '1.02', '1.20', '1.22', '1.24', '1.28', '1.02', '0.87', '0.67', '1.94'…	1.01012	['0.54', '0.82', '0.47', '0.96', '0.75', '2.07', '4.74', '1.18', '0.81', '1.02', '1.40', '1.60', '1.51', '1.36', '1.38', '1.39', '1.42', '1.37', '1.39', '1.33', '1.29', '1.15', '1.58', '1.55', '1.48', '1.44', '1.66', '1.50', '1.49', '1.55', '1.38', '0.47', '1.30', '1.75', '1.76', '1.75', '1.25', '1.65', '1.41', '8.50', '8.64', '4.97', '0.76', '0.74', '0.71', '0.81', '0.78', '0.79', '0.86', '0.89'…	1.30724
sp|A7ZHR0|EFTS_ECO24	A7ZHR0	Elongation factor Ts OS=Escherichia coli O139:H28 (strain E24377A / ETEC) GN=tsf PE=3 SV=1	tsf	0.790084	['0.62', '0.60', '0.59', '0.23', '0.27', '0.22', '0.39', '0.76', '0.55', '0.89', '0.59', '0.48', '0.54', '0.53', '0.55', '0.53', '0.54', '0.57', '0.34', '0.33', '0.30', '0.78', '0.74', '0.67', '0.73', '0.70', '0.84', '0.66', '0.74', '0.64', '0.55', '0.54', '0.53', '0.95', '0.96', '0.83', '0.95', '0.95', '0.99', '0.62', '0.61', '0.72', '0.62', '0.74', '0.63', '0.18', '0.18', '0.19', '0.93', '0.91'…	0.675285	['0.74', '0.75', '0.74', '1.53', '1.01', '1.19', '0.56', '0.56', '0.56', '2.35', '2.01', '2.65', '1.07', '1.41', '1.44', '0.81', '0.76', '0.76', '0.67', '0.63', '0.82', '1.34', '1.81', '2.39', '0.98', '1.13', '20.74', '0.98', '1.76', '1.68', '0.41', '0.43', '0.46', '0.63', '0.65', '0.69', '3.52', '2.14', '1.87', '1.50', '0.35', '1.66', '0.78', '0.76', '0.83', '2.80', '2.56', '2.95', '2.68', '2.26…	1.07794	['0.49', '0.50', '0.59', '0.60', '0.57', '0.57', '0.92', '1.16', '1.26', '0.45', '0.42', '0.40', '0.76', '0.68', '0.75', '0.98', '0.78', '1.30', '0.41', '0.50', '0.56', '0.50', '0.51', '0.55', '0.27', '0.21', '0.25', '0.20', '0.23', '0.20', '0.47', '0.47', '0.62', '0.42', '0.44', '0.46', '0.42', '0.46', '0.43', '0.36', '0.35', '0.40', '0.46', '0.48', '0.48', '0.92', '1.24', '1.37', '1.21', '1.95'…	0.557196	['1.50', '1.51', '1.48', '0.63', '1.22', '0.92', '1.88', '1.87', '1.84', '0.76', '0.63', '2.11', '1.27', '0.62', '0.86', '0.90', '0.95', '1.00', '0.85', '0.85', '0.88', '0.72', '0.73', '0.53', '0.92', '0.93', '0.87', '1.22', '1.21', '1.22', '0.95', '0.95', '0.92', '0.85', '0.82', '1.01', '0.52', '0.57', '0.57', '1.06', '1.08', '1.39', '1.07', '1.14', '1.24', '1.30', '1.29', '1.27', '0.67', '0.78'…	0.960735
sp|A8A5E6|EFTU1_ECOHS	A8A5E6	Elongation factor Tu 1 OS=Escherichia coli O9:H4 (strain HS) GN=tuf1 PE=3 SV=1	tuf1	0.803305	['0.67', '0.69', '0.73', '0.76', '0.94', '0.79', '0.63', '0.60', '0.65', '0.65', '0.61', '0.52', '1.51', '1.20', '1.11', '1.58', '0.67', '1.21', '0.49', '0.49', '0.49', '0.60', '0.63', '0.61', '0.65', '0.53', '0.61', '0.60', '0.50', '0.65', '1.08', '1.15', '1.13', '1.13', '2.13', '1.11', '0.72', '0.70', '0.68', '1.28', '1.29', '1.19', '1.26', '2.06', '1.42', '0.53', '0.53', '0.52', '0.69', '0.75'…	0.640612	['0.74', '0.77', '0.90', '0.78', '0.89', '0.86', '0.78', '0.78', '0.78', '0.80', '0.74', '0.69', '3.78', '2.96', '3.27', '3.18', '2.94', '1.12', '0.98', '0.99', '0.99', '0.72', '0.74', '0.73', '0.80', '0.68', '0.81', '0.58', '0.51', '0.50', '0.32', '0.54', '0.38', '0.73', '0.60', '0.57', '2.04', '2.02', '2.09', '1.50', '1.10', '1.96', '0.81', '1.04', '1.04', '1.98', '2.51', '0.50', '1.31', '1.66'…	1.28355	['0.57', '0.56', '0.57', '0.71', '0.66', '0.59', '0.67', '0.67', '0.60', '0.91', '0.92', '0.35', '0.50', '0.51', '0.54', '0.39', '0.50', '0.45', '0.48', '0.34', '0.30', '3.82', '0.53', '1.00', '1.24', '2.66', '0.29', '0.22', '0.46', '0.48', '0.53', '0.72', '0.56', '0.12', '0.24', '0.50', '0.27', '0.14', '0.19', '0.29', '0.55', '0.31', '0.41', '0.29', '0.31', '0.40', '0.47', '0.40', '0.52', '0.53'…	0.458339	['1.12', '0.82', '0.92', '0.87', '0.87', '1.04', '1.32', '1.34', '1.34', '1.29', '1.35', '1.24', '5.87', '5.28', '5.18', '5.20', '5.32', '1.67', '1.94', '1.97', '1.91', '1.01', '0.99', '0.97', '0.76', '0.91', '0.82', '1.28', '0.85', '1.94', '0.41', '0.58', '0.55', '0.59', '0.61', '0.58', '0.96', '0.93', '0.92', '1.13', '1.05', '1.11', '1.13', '1.57', '1.12', '0.87', '1.09', '0.64', '1.00', '1.00'…	1.10491
sp|P0A3B3|TYPA_ECO57	P0A3B3	GTP-binding protein TypA/BipA OS=Escherichia coli O157:H7 GN=typA PE=3 SV=1	typA	0.917685	['1.52', '1.23', '0.87', '0.69', '0.89', '0.62', '1.05', '0.67', '1.23', '0.65', '0.65', '0.73', '1.02', '4.54', '0.91', '1.29', '1.17', '1.35', '0.58', '0.58', '2.16', '0.57', '0.59', '0.62', '0.40', '0.34', '0.54', '0.60', '0.53', '0.96', '0.58', '0.44', '1.36', '0.72', '0.81', '0.49', '0.57', '0.53', '0.43', '0.58', '0.40', '0.47']	0.751889	['0.97', '0.81', '2.72', '0.49', '11.15', '1.83', '0.71', '1.92', '0.82', '2.35', '0.88', '2.31', '0.74', '0.73', '1.37', '0.84', '1.01', '0.74', '1.34', '3.68', '1.57', '1.57', '1.42', '0.77', '0.36', '0.52', '1.97', '1.17', '1.07', '1.97', '0.31', '1.77', '0.52', '1.39', '0.68', '2.75', '0.92', '0.84', '0.94', '0.44', '0.49', '2.79', '0.63', '0.90', '1.05', '0.99', '1.08', '0.89', '0.44', '0.69…	1.05476	['0.52', '0.54', '0.57', '0.55', '0.59', '0.50', '1.13', '1.75', '1.76', '0.48', '0.57', '0.73', '3.35', '2.60', '3.55', '0.83', '0.73', '1.93', '0.68', '0.65', '0.56', '0.59', '2.22', '2.72', '0.39', '0.30', '0.55', '0.52', '0.43', '2.11', '0.65', '1.17', '0.88', '0.60', '0.60', '1.12']	0.8613	['0.59', '0.84', '1.82', '1.64', '1.60', '1.66', '1.39', '0.61', '1.18', '0.69', '1.32', '0.63', '1.13', '1.19', '1.21', '1.38', '0.64', '0.83', '1.22', '1.38', '1.10', '1.32', '1.32', '0.75', '1.70', '1.66', '1.28', '0.52', '0.76', '1.48', '0.43', '0.29', '0.32', '1.51', '2.19', '0.45', '1.49', '1.24', '1.55', '1.15', '1.08', '1.13', '1.36', '1.49', '2.41', '0.71', '0.74', '0.73']	1.03828
sp|B7URX8|SYY_ECO27	B7URX8	Tyrosine--tRNA ligase OS=Escherichia coli O127:H6 (strain E2348/69 / EPEC) GN=tyrS PE=3 SV=1	tyrS	0.778991	['0.58', '0.82', '0.53', '0.67', '0.48', '0.80', '1.61', '0.95', '0.93', '0.25', '0.21', '0.20', '0.58', '0.61', '0.53', '0.59', '0.80', '0.90', '0.83', '0.74', '0.75', '0.82', '0.45', '0.38']	0.60028	['0.91', '0.97', '1.07', '0.54', '1.05', '1.49', '0.75', '0.96', '0.96', '0.56', '0.28', '1.42', '0.65', '0.86', '1.00', '0.91', '0.65', '1.11', '0.13', '0.41', '0.72', '1.15', '1.36', '1.61', '0.81', '0.77', '1.51', '1.23', '0.63', '0.38']	0.799203	['0.52', '0.39', '0.73', '0.37', '0.45', '0.54', '1.02', '1.27', '1.67', '0.36', '0.10', '0.70', '0.68', '1.51', '0.89', '1.09', '1.45', '0.99', '0.84', '0.89', '0.87', '0.12', '0.10', '0.13', '0.18', '0.19', '1.74', '0.43', '0.86', '1.23', '1.08', '0.75', '1.30']	0.590063	['1.23', '0.90', '0.90', '1.83', '1.33', '0.94', '0.67', '1.60', '1.14', '1.48', '3.01', '1.83', '1.47', '1.41', '1.65', '1.32', '2.18', '1.44', '0.54', '0.78', '0.84', '1.48', '2.47', '1.74', '1.02', '0.96', '0.99', '1.06', '1.10', '1.27', '1.54', '1.60', '2.29']	1.30083
sp|B7UGN6|UPP_ECO27	B7UGN6	Uracil phosphoribosyltransferase OS=Escherichia coli O127:H6 (strain E2348/69 / EPEC) GN=upp PE=3 SV=1	upp	0.70729	['0.25', '0.26', '0.25', '0.22', '0.23', '0.20', '0.42', '0.40', '0.32', '0.28', '0.32', '0.25', '0.30', '0.30', '0.30', '0.36', '0.29', '0.35', '0.59', '0.57', '0.64', '0.46', '0.52', '0.49', '0.66', '0.60', '0.58', '0.49', '1.02', '0.86', '0.93', '1.13', '1.08', '0.43', '0.33', '0.40', '0.41', '0.55', '0.33', '0.87', '0.88', '1.05', '0.29', '0.30', '0.31', '0.24', '0.23', '0.40', '0.65', '0.70'…	0.455516	['1.94', '5.47', '7.82', '2.42', '1.71', '1.75', '0.60', '0.59', '0.55', '0.53', '0.45', '0.53', '0.90', '0.88', '0.85', '0.68', '0.72', '0.68', '1.08', '1.01', '1.03', '0.98', '0.94', '0.86', '0.62', '0.62', '0.73', '0.44', '0.34', '0.34', '0.81', '0.64', '0.69', '0.91', '0.68', '0.25', '0.75', '0.77', '0.68', '0.48', '0.47', '0.80', '0.88', '0.79', '0.84', '0.73', '0.86', '0.72', '0.81', '0.80'…	1.07291	['0.55', '1.03', '0.87', '0.30', '0.34', '0.27', '0.46', '0.46', '0.40', '0.59', '0.50', '0.62', '0.43', '0.45', '0.46', '0.46', '0.51', '0.46', '0.51', '0.50', '0.56', '0.33', '0.39', '0.30', '1.90', '1.78', '1.54', '2.10', '2.10', '1.84', '0.52', '0.54', '0.66', '0.39', '0.66', '0.68', '0.52', '0.53', '0.61', '0.61', '0.73', '0.79', '0.60', '0.20', '0.15', '0.34', '0.29', '0.59', '0.35', '0.35'…	0.532706	['1.71', '1.30', '3.68', '0.91', '1.27', '1.63', '1.27', '1.25', '1.51', '1.12', '1.02', '1.27', '1.21', '1.19', '1.26', '1.10', '1.16', '1.12', '1.18', '1.14', '1.14', '1.78', '1.14', '1.41', '1.33', '1.60', '1.34', '2.06', '1.03', '1.49', '1.24', '1.27', '1.39', '1.41', '1.33', '1.31', '5.48', '0.07', '0.04', '0.51', '0.49', '0.52', '0.68', '0.63', '0.59', '0.58', '0.56', '0.77', '1.10', '1.08'…	0.961243
sp|Q8FAD1|SYV_ECOL6	Q8FAD1	Valine--tRNA ligase OS=Escherichia coli O6:H1 (strain CFT073 / ATCC 700928 / UPEC) GN=valS PE=3 SV=1	valS	0.852997	['0.56', '0.73', '1.21', '0.58', '0.47', '0.42', '0.67', '0.94', '1.08', '0.47', '0.34', '0.55', '0.37', '0.30', '0.20', '0.43', '0.11', '0.29', '2.88', '2.06', '1.23', '0.73', '2.48', '0.83', '1.33', '0.84', '0.83', '0.62', '0.58', '0.76', '0.72', '0.78', '0.58', '0.58', '0.67', '1.02', '0.70', '0.69', '0.67', '0.62', '0.64', '0.59', '0.43', '0.61', '0.67', '0.77', '0.76', '0.89', '0.42', '0.36'…	0.693445	['0.62', '1.21', '1.09', '1.40', '1.79', '1.02', '2.22', '0.91', '0.86', '0.62', '0.58', '0.79', '0.78', '0.89', '0.97', '0.23', '0.22', '0.09', '1.14', '1.55', '1.27', '0.45', '0.57', '0.62', '1.04', '1.62', '1.18', '1.07', '0.92', '0.88', '1.20', '0.87', '1.18', '1.12', '0.76', '1.05', '0.67', '0.91', '0.77', '0.43', '0.93', '0.84', '1.66', '1.90', '1.72', '0.54', '0.51', '1.67', '0.96', '0.71'…	0.941663	['0.71', '0.63', '1.28', '1.67', '1.10', '1.18', '0.91', '0.79', '0.76', '0.40', '0.51', '0.92', '0.73', '0.58', '1.03', '1.36', '0.95', '0.69', '0.65', '0.82', '0.80', '0.56', '0.91', '0.44', '0.71', '0.98', '0.94', '0.98', '0.80', '0.49', '0.42', '3.01', '1.24', '0.60', '0.75', '0.63', '0.46', '1.17', '0.77', '0.53', '0.54', '1.04', '0.72', '0.37', '0.54', '0.31', '0.33', '0.38', '0.69', '0.50'…	0.730342	['0.89', '0.95', '1.76', '0.98', '0.68', '0.90', '1.71', '1.74', '1.29', '1.11', '1.19', '1.33', '0.90', '0.95', '1.38', '1.68', '2.34', '0.24', '1.03', '0.69', '1.16', '1.32', '0.92', '1.16', '2.74', '2.72', '1.73', '1.09', '0.95', '1.12', '1.99', '1.51', '2.06', '1.09', '1.03', '0.98', '1.30', '1.18', '1.31', '1.20', '1.07', '3.78', '1.35', '1.03', '1.15', '1.02', '1.84', '1.60', '0.70', '1.08'…	1.11008
sp|P09030|EX3_ECOLI	P09030	Exodeoxyribonuclease III OS=Escherichia coli (strain K12) GN=xthA PE=1 SV=4	xthA	0.669473	['0.69', '0.59', '0.76', '0.86', '0.43', '0.65', '0.59', '0.65', '0.76', '0.60', '0.60', '0.53', '1.44', '0.69', '1.41', '0.25', '0.85', '0.30']	0.643165	['1.37', '3.51', '1.82', '0.95', '0.59', '1.27', '1.20', '1.13', '1.48', '0.93', '0.82', '0.96', '0.69', '0.88', '0.84', '1.05', '0.96', '1.28', '3.80', '7.74', '7.16', '1.34', '1.58', '2.63', '0.76', '1.05', '1.02', '1.03', '0.25', '0.34', '1.41', '1.01', '1.43', '1.06', '1.04', '1.08', '0.92', '0.63', '1.08', '1.51', '1.53', '1.94']	1.21519	['0.70', '0.75', '1.03', '1.18', '0.58', '0.89', '0.89', '0.79', '0.68', '0.49', '0.36', '0.27', '0.51', '0.42', '0.58', '0.13', '0.12', '0.20', '0.87', '0.26', '0.32', '0.43', '0.62', '0.41', '0.55', '0.45', '0.68']	0.487838	['0.70', '0.79', '0.12', '0.47', '0.67', '0.54', '0.79', '0.71', '0.63', '0.50', '0.47', '0.63', '0.39', '0.48', '0.54', '0.45', '0.58', '0.76', '0.34', '0.46', '0.54', '1.36', '1.09', '1.80', '0.21', '0.14', '0.38', '0.46', '0.55', '0.73', '0.40', '0.40', '0.74']	0.526857
sp|B7UJP9|YAJQ_ECO27	B7UJP9	UPF0234 protein YajQ OS=Escherichia coli O127:H6 (strain E2348/69 / EPEC) GN=yajQ PE=3 SV=1	yajQ	0.901915	['0.68', '0.68', '0.81', '1.01', '1.03', '1.07', '1.09', '1.08', '1.14', '0.27', '0.41', '0.45', '0.33', '0.41', '0.71', '0.90', '0.67', '0.88', '0.93', '0.75', '0.72', '0.49', '0.68', '0.52', '1.04', '1.23', '0.50', '1.11', '1.19', '1.40', '0.54', '2.75', '0.99', '0.49', '0.52', '0.51', '0.47', '0.55', '0.70', '0.71', '0.58', '0.61', '0.87', '1.18', '3.37', '0.56', '0.58', '0.60', '1.03', '0.88'…	0.741566	['1.11', '1.10', '1.08', '4.62', '4.64', '4.84', '1.90', '2.05', '1.81', '0.32', '0.86', '0.73', '0.48', '0.91', '0.96', '1.12', '1.06', '0.67', '1.04', '1.06', '0.93', '0.68', '0.80', '0.79', '1.31', '1.18', '0.83', '0.73', '0.77', '0.42', '0.72', '0.71', '0.72', '0.61', '0.61', '0.49', '1.79', '2.53', '1.36', '0.69', '1.03', '1.14', '3.62', '2.27', '1.49', '1.06', '1.06', '1.13']	1.083	['0.66', '0.67', '0.68', '0.32', '0.36', '0.31', '0.43', '0.45', '0.45', '1.13', '1.03', '0.95', '0.73', '0.96', '0.95', '1.42', '1.26', '1.06', '1.04', '1.03', '1.02', '0.63', '0.58', '0.66', '0.36', '0.64', '0.29', '0.59', '0.60', '0.64', '0.60', '1.17', '0.64', '0.94', '0.94', '0.93', '0.88', '0.78', '0.56', '0.65', '0.65', '0.54', '0.94', '0.82', '0.72', '2.38', '0.85', '0.73', '1.35', '1.46'…	0.749233	['1.49', '1.46', '0.71', '1.32', '1.27', '1.20', '1.05', '1.00', '0.88', '1.72', '0.95', '0.94', '1.75', '0.45', '2.18', '2.12', '2.92', '1.87', '1.45', '1.52', '1.65', '3.25', '1.00', '1.78', '1.03', '0.81', '1.05', '1.20', '1.17', '1.25', '1.04', '1.17', '1.37', '0.35', '0.68', '0.15', '1.22', '1.12', '1.10', '0.57', '0.67', '0.77', '1.09', '0.71', '0.72', '1.46', '1.44', '1.12']	1.09968
sp|P0AAR3|YBAK_ECOLI	P0AAR3	Cys-tRNA(Pro)/Cys-tRNA(Cys) deacylase ybaK OS=Escherichia coli (strain K12) GN=ybaK PE=1 SV=1	ybaK	0.765457	['0.35', '0.34', '0.37', '0.42', '0.37', '0.45', '0.88', '0.57', '0.47']	0.448463	['1.14', '1.11', '1.51', '0.56', '0.50', '0.68', '0.88', '1.31', '0.80', '0.63', '0.92', '0.61']	0.837985	['2.37', '2.17', '3.45', '0.62', '0.97', '0.79', '1.20', '2.23', '1.62', '1.68', '1.29', '1.18', '0.43', '0.68', '0.37', '1.91', '2.07', '0.75']	1.2057	['1.32', '1.69', '1.77', '0.50', '0.52', '0.49', '0.80', '0.60', '0.33']	0.757669
sp|P0AAU1|YBEL_ECO57	P0AAU1	Uncharacterized protein YbeL OS=Escherichia coli O157:H7 GN=ybeL PE=4 SV=1	ybeL	0.86801	['1.79', '1.65', '0.80', '0.95', '0.88', '1.00', '0.60', '0.62', '0.73', '0.89', '0.71', '0.97']	0.910267	['0.10', '0.09', '0.17', '0.87', '0.95', '0.30', '1.03', '0.80', '1.21', '0.90', '1.27', '0.83', '0.66', '0.93', '0.89', '1.69', '4.62', '3.05', '2.84', '2.27', '1.41', '0.80', '0.81', '0.94', '0.68', '1.43', '2.38', '2.28', '1.98', '2.64', '1.88', '2.43', '1.14', '5.04', '2.12', '1.83', '2.26', '0.87', '1.42', '0.74', '0.91', '0.92', '0.48', '1.65', '0.88', '1.42', '1.59', '2.70', '1.15', '1.33'…	1.13716	['8.60', '5.35', '8.16', '0.48', '0.74', '0.41', '2.23', '1.26', '1.21', '9.64', '8.42', '7.80', '0.64', '1.10', '0.41', '0.96', '1.17', '0.69', '1.10', '1.06', '0.95', '0.68', '0.27', '0.46', '0.34', '0.40', '0.76', '0.77', '0.69', '0.57', '0.18', '0.62', '0.14', '0.43', '0.11', '0.13', '0.87', '0.27', '0.20', '0.56', '0.81', '0.74', '0.73', '0.21', '0.69']	0.778149	['0.87', '0.63', '0.89', '0.46', '0.80', '1.15', '0.67', '0.51', '0.67', '0.56', '0.54', '0.60', '0.38', '0.10', '1.19', '0.13', '0.23', '1.39', '0.95', '1.00', '1.48', '0.51', '0.52', '0.59', '2.04', '1.80', '1.65', '0.46', '0.30', '0.53', '2.28', '1.38', '2.03']	0.704766
sp|P0A9K4|PHOL_ECOL6	P0A9K4	PhoH-like protein OS=Escherichia coli O6:H1 (strain CFT073 / ATCC 700928 / UPEC) GN=ybeZ PE=3 SV=2	ybeZ	0.856679	['0.68', '0.41', '0.52', '0.90', '2.11', '0.04', '0.95', '1.14', '1.06', '2.22', '1.04', '1.47', '0.88', '1.10', '0.71', '0.97', '1.30', '0.42', '0.97', '0.67', '0.55', '0.56', '0.58', '0.68', '0.15', '0.54', '0.26', '1.05', '0.37', '4.14', '0.74', '0.18', '0.40']	0.672842	['0.68', '0.62', '3.82', '0.70', '1.01', '1.16', '1.10', '0.60', '1.28', '1.15', '1.00', '1.24', '1.12', '1.10', '0.95', '1.68', '1.07', '1.68', '0.75', '0.71', '0.80', '0.46', '0.85', '0.37', '0.46', '1.34', '2.11', '1.15', '1.52', '1.35']	1.00116	['1.01', '1.03', '1.22', '1.33', '1.79', '1.85', '0.81', '0.82', '0.66', '0.45', '0.51', '0.31', '0.93', '1.06', '1.76', '0.97', '0.72', '1.56', '1.00', '0.83', '0.71', '0.56', '0.81', '0.61', '1.28', '0.38', '2.11', '0.49', '0.05', '0.17']	0.758353	['2.19', '0.86', '1.67', '0.56', '0.88', '0.98', '0.95', '1.22', '1.20', '0.92', '0.82', '1.03', '0.82', '1.76', '1.15', '1.03', '1.14', '1.63', '0.95', '1.07', '1.14', '1.85', '0.88', '0.88', '1.44', '2.07', '0.48', '0.79', '0.41', '1.01', '1.66', '0.97', '1.22', '0.84', '1.07', '1.01', '0.94', '1.08', '1.05']	1.05435
sp|P75821|YBJS_ECOLI	P75821	Uncharacterized protein YbjS OS=Escherichia coli (strain K12) GN=ybjS PE=4 SV=2	ybjS	1.28657			['1.43', '1.29', '1.56']	1.42218			['2.03', '1.04', '0.75']	1.16388
sp|A7ZK06|YCAR_ECO24	A7ZK06	UPF0434 protein YcaR OS=Escherichia coli O139:H28 (strain E24377A / ETEC) GN=ycaR PE=3 SV=1	ycaR	0.818059	['0.51', '0.78', '1.40', '0.67', '0.45', '0.69', '0.66', '0.66', '0.74', '0.58', '0.61', '0.60', '0.42', '0.31', '0.57', '0.95', '1.64', '1.60']	0.695614	['1.08', '1.08', '1.06', '0.41', '0.47', '0.41', '2.07', '5.23', '2.74', '6.50', '8.52', '0.34', '0.27', '0.98', '0.52', '0.56', '0.72', '0.75', '1.99', '2.24', '2.00', '1.26', '1.35', '1.39', '0.88', '0.93', '1.11', '0.78', '0.82', '0.81', '0.91', '0.65', '0.65']	1.06751	['0.67', '0.67', '0.67', '0.66', '0.65', '0.65', '0.57', '0.57', '0.68', '0.52', '0.64', '0.68', '0.79', '0.85', '0.85', '0.47', '0.42', '0.45', '0.35', '0.49', '0.44', '0.47', '0.41', '0.57', '0.77', '0.78', '0.75', '1.08', '0.81', '0.88']	0.620633	['0.82', '0.71', '1.02', '1.29', '0.27', '0.13', '1.52', '1.27', '1.59', '0.92', '0.90', '0.95', '1.95', '0.97', '0.92', '1.28', '1.31', '1.29', '1.44', '0.87', '1.71']	0.971772
sp|P0AB16|YCCJ_ECO57	P0AB16	Uncharacterized protein YccJ OS=Escherichia coli O157:H7 GN=yccJ PE=4 SV=1	yccJ	1.3492	['1.13', '0.95', '1.13', '1.60', '1.94', '2.24', '1.72', '1.94', '1.68', '1.12', '1.01', '1.22', '5.78', '2.09', '0.65', '1.15', '0.69', '0.63', '0.72', '0.78', '0.38', '1.22', '1.00', '0.53', '2.27', '0.95', '1.95', '1.02', '2.21', '0.59', '0.96', '1.55', '2.28']	1.21739	['0.81', '0.61', '1.45', '5.09', '5.22', '5.26', '2.17', '2.19', '2.29', '2.52', '2.45', '2.48', '1.91', '2.41', '1.34', '2.21', '2.38', '0.62', '2.53', '2.29', '0.55', '2.30', '2.70', '1.28', '2.44', '0.33', '1.77', '0.91', '0.84', '1.54']	1.73233	['1.04', '0.78', '0.67', '1.78', '0.47', '0.28', '1.72', '1.67', '1.76', '2.00', '1.65', '1.81', '2.76', '2.60', '1.48', '2.01', '2.63', '1.34', '3.11', '3.24', '2.98', '1.62', '0.82', '1.15', '1.46', '1.82', '0.50', '2.69', '0.35', '2.37', '0.69', '0.59', '0.55']	1.31704	['0.74', '1.24', '1.19', '3.46', '1.34', '3.94', '0.97', '0.87', '1.01', '0.92', '0.76', '1.22', '0.80', '0.88', '1.11', '0.79', '0.83', '1.68', '1.49', '1.31', '1.11', '0.91', '1.26', '0.93', '0.84', '2.25', '1.68', '0.86', '0.70', '3.90', '0.50', '2.64', '1.18']	1.193
sp|P75874|YCCU_ECOLI	P75874	Uncharacterized protein yccU OS=Escherichia coli (strain K12) GN=yccU PE=1 SV=2	yccU	1.02412	['0.46', '0.72', '0.54', '0.95', '2.20', '1.25', '0.75', '0.61', '0.66', '0.76', '0.93', '0.93', '0.21', '0.55', '0.22']	0.668112	['1.38', '1.03', '1.19', '1.28', '1.30', '1.41', '2.80', '2.80', '2.31', '2.41', '2.12', '2.16', '1.31', '1.85', '1.60', '1.53', '2.48', '1.89', '1.03', '1.29', '1.29', '0.92', '0.57', '0.84', '0.89', '0.95', '1.15', '1.59', '0.75', '0.70', '1.24', '1.01', '1.44']	1.35736	['1.73', '1.07', '1.45', '1.48', '2.10', '1.71', '0.24', '0.60', '2.62', '0.99', '0.65', '0.83', '1.18', '1.21', '1.17', '0.57', '0.71', '1.27', '1.64', '1.45', '1.52', '0.77', '0.91', '0.97', '1.00', '0.81', '1.16', '0.49', '0.63', '0.56', '1.47', '1.03', '0.90', '0.67', '0.41', '0.52', '0.35', '0.56', '0.67', '0.79', '0.62', '0.67', '0.94', '5.73', '5.15']	0.967951	['1.84', '1.16', '1.30', '0.83', '1.31', '1.79', '0.94', '1.14', '1.22', '1.39', '0.56', '1.40', '1.44', '1.42', '0.76', '1.25', '1.89', '1.96', '1.88', '1.86', '0.48', '0.94', '4.02', '2.04', '0.29', '1.50', '1.42']	1.25316
sp|Q1RD70|YCEF1_ECOUT	Q1RD70	Maf-like protein yceF 1 OS=Escherichia coli (strain UTI89 / UPEC) GN=yceF1 PE=3 SV=2	yceF1	1.00672	['0.81', '0.76', '0.65', '0.76', '0.82', '0.70', '4.37', '0.96', '1.03', '0.58', '1.13', '0.83']	0.92845	['0.68', '0.76', '1.01', '2.20', '1.23', '1.29', '1.22', '0.45', '0.49', '0.99', '1.49', '1.04', '6.91', '1.39', '2.54', '0.44', '1.13', '0.51', '1.79', '2.01', '1.13', '3.17', '2.26', '2.74', '1.20', '2.46', '1.12']	1.30173	['4.48', '3.01', '1.13', '15.25', '5.78', '2.08', '0.76', '0.47', '1.12', '0.64', '0.70', '0.69', '0.12', '0.16', '0.17', '0.97', '0.47', '0.39']	0.914288	['1.77', '0.92', '2.15', '1.22', '1.39', '0.42', '0.65', '1.10', '0.97', '1.03', '0.39', '0.55', '0.81', '0.44', '1.00', '1.25', '1.24', '1.28']	0.929551
sp|A7ZKH2|YCEH_ECO24	A7ZKH2	UPF0502 protein YceH OS=Escherichia coli O139:H28 (strain E24377A / ETEC) GN=yceH PE=3 SV=1	yceH	0.809923	['0.80', '1.30', '0.82', '1.56', '0.76', '1.11', '0.46', '0.53', '0.36', '1.11', '1.40', '1.05', '0.29', '0.41', '0.28', '0.48', '0.45', '0.58', '0.58', '0.68', '0.84']	0.670407	['0.44', '0.60', '0.62', '2.84', '1.16', '1.73', '0.39', '0.96', '0.93', '1.57', '1.60', '1.48', '0.47', '1.02', '1.61', '1.43', '1.42', '1.26', '0.60', '0.46', '0.66', '0.87', '1.19', '1.39']	0.981838	['0.47', '1.50', '1.08', '1.64', '1.47', '1.14', '1.60', '1.30', '0.55', '0.08', '1.51', '0.22', '0.36', '0.35', '0.45', '0.72', '0.59', '0.43', '0.59', '0.48', '0.71']	0.65449	['1.76', '0.77', '0.30', '3.27', '2.75', '2.14', '2.16', '1.69', '1.74', '0.98', '1.13', '0.53', '1.20', '1.12', '1.13', '0.74', '0.59', '0.58', '0.81', '0.80', '0.81', '0.62', '0.63', '0.43']	0.998837
sp|P0AB63|YCIN_ECO57	P0AB63	Protein yciN OS=Escherichia coli O157:H7 GN=yciN PE=4 SV=1	yciN	1.0975	['0.88', '0.84', '0.91', '0.74', '0.75', '0.60', '0.68', '0.59', '0.65', '0.77', '0.73', '0.66', '0.55', '0.40', '0.46']	0.665024	['1.55', '1.61', '1.63', '1.34', '1.32', '1.09', '1.77', '1.50', '3.01', '3.09', '0.62', '0.95', '2.01', '1.72', '1.92', '1.23', '1.16', '1.07', '3.79', '3.84', '3.61', '3.22', '2.61', '3.21', '0.98', '0.94', '0.92', '2.26', '1.28', '1.51']	1.68369	['1.18', '1.08', '1.05', '0.87', '1.03', '0.23', '1.04', '1.01', '1.02', '0.99', '0.93', '0.80', '0.67', '0.76', '0.90', '0.92', '0.33', '0.89', '1.01', '0.97', '1.04', '1.13', '1.05', '1.12', '1.83', '0.85', '1.48', '1.21', '1.06', '1.03', '1.38', '1.36', '1.40', '1.19', '1.34', '1.31']	0.986464	['1.92', '1.24', '1.73', '1.45', '1.32', '48.23', '0.89', '0.82', '0.86', '0.65', '0.82', '1.03', '1.11', '0.80', '0.78', '0.81', '0.77', '0.80', '2.25', '1.92', '1.55']	1.31354
sp|P0AFR4|YCIO_ECOLI	P0AFR4	Uncharacterized protein YciO OS=Escherichia coli (strain K12) GN=yciO PE=1 SV=1	yciO	0.825137	['1.03', '0.90', '1.11', '0.65', '0.62', '0.47', '0.83', '0.75', '0.71', '0.47', '0.36', '0.47', '0.75', '0.78', '1.00', '0.33', '0.31', '0.75', '0.56', '0.48', '0.48', '0.34', '0.35', '0.44']	0.580315	['1.66', '1.22', '1.08', '0.95', '0.93', '0.62', '0.71', '0.79', '0.68', '2.61', '2.03', '2.04', '1.53', '1.54', '1.07', '0.67', '1.39', '1.30', '3.19', '8.04', '2.00', '2.13', '1.68', '1.00', '0.81', '0.79', '1.05', '0.67', '0.42', '0.65']	1.21448	['1.42', '0.85', '1.84', '0.65', '0.57', '0.79', '0.67', '0.77', '1.97', '0.42', '0.50', '0.37', '0.68', '0.74', '0.88', '1.13', '0.86', '4.21', '0.47', '0.34', '0.60', '0.80', '0.59', '0.66', '1.05', '0.96', '0.98', '0.70', '0.92', '0.58']	0.795252	['1.95', '1.64', '5.54', '1.15', '1.39', '1.27', '0.95', '1.75', '0.91', '0.89', '1.46', '0.73', '1.95', '1.06', '2.83', '0.91', '0.99', '0.44', '0.16', '0.09', '0.23', '0.34', '0.29', '0.26']	0.827072
sp|P0ACY1|YDJA_ECOLI	P0ACY1	Putative NAD(P)H nitroreductase ydjA OS=Escherichia coli (strain K12) GN=ydjA PE=1 SV=1	ydjA	0.816213	['0.73', '0.80', '1.18', '0.58', '0.60', '0.61', '0.46', '0.49', '0.49', '0.70', '0.55', '0.34', '0.93', '1.34', '1.61', '0.58', '0.80', '1.14', '0.87', '0.89', '0.92', '0.96', '0.66', '1.06']	0.752655	['1.68', '1.05', '1.72', '1.17', '1.07', '1.19', '0.84', '0.78', '0.77', '0.72', '0.45', '1.36', '1.48', '1.20', '1.71', '2.38', '1.98', '2.78', '1.02', '0.84', '0.88', '1.10', '1.19', '1.27', '1.01', '0.88', '0.86', '0.92', '0.81', '1.05']	1.12021	['0.48', '0.71', '0.92', '0.63', '0.45', '0.57', '0.51', '0.50', '0.27', '0.55', '0.68', '0.50', '1.25', '0.81', '0.96', '0.35', '0.46', '0.17', '0.58', '0.56', '0.87', '0.28', '0.26', '0.31', '0.39', '0.38', '0.44']	0.500169	['0.67', '1.58', '0.54', '0.82', '0.70', '0.64', '1.08', '1.08', '1.08', '1.27', '0.99', '1.03', '3.73', '1.54', '1.37', '0.85', '0.94', '0.98', '1.22', '0.92', '1.23', '0.89', '1.20', '0.82', '1.31', '1.32', '0.84', '1.02', '1.03', '1.11', '0.96', '1.00', '1.29']	1.05246
sp|Q0TGW8|YEBC_ECOL5	Q0TGW8	Probable transcriptional regulatory protein YebC OS=Escherichia coli O6:K15:H31 (strain 536 / UPEC) GN=yebC PE=3 SV=1	yebC	1.05889	['3.46', '3.03', '2.09', '0.70', '0.29', '0.26', '1.21', '0.89', '1.75', '1.00', '1.00', '0.94']	1.06001	['0.98', '0.94', '1.19', '0.99', '1.00', '0.54', '1.02', '0.58', '0.43', '0.25', '1.39', '2.01', '0.50', '0.48', '0.80', '0.73', '0.65', '3.33', '1.67', '1.17', '2.51', '0.59', '0.56', '0.52', '4.35', '1.56', '5.36']	0.998056	['0.65', '0.66', '0.73', '0.58', '0.76', '2.00', '1.05', '0.73', '0.73', '0.61', '0.72', '0.58', '1.57', '1.26', '2.62']	0.898961	['2.04', '1.85', '1.89', '2.13', '2.64', '0.65', '1.23', '1.36', '1.13', '1.18', '0.61', '1.12', '0.71', '1.52', '1.03', '1.13', '1.12', '1.25', '0.90', '1.26', '2.87', '1.89', '2.09', '1.49', '1.25', '1.15', '0.98']	1.3219
sp|P0AD05|YECA_ECOLI	P0AD05	Uncharacterized protein YecA OS=Escherichia coli (strain K12) GN=yecA PE=4 SV=1	yecA	0.661697	['0.35', '0.46', '0.61', '0.09', '0.23', '0.27', '0.23', '0.45', '0.59', '0.56', '0.58', '0.76', '22.66', '1.01', '2.69']	0.602145	['3.84', '4.88', '3.20', '0.92', '1.22', '1.00', '0.83', '0.82', '0.73', '2.40', '1.26', '2.38', '0.55', '0.74', '2.82', '0.56', '0.61', '0.64', '1.54', '0.39', '1.18']	1.19631	['0.19', '0.18', '0.22', '0.18', '0.11', '0.80', '0.32', '0.33', '0.37', '0.41', '0.50', '0.36', '0.30', '0.22', '0.33', '0.47', '0.46', '0.57']	0.314454	['0.92', '0.71', '0.90', '0.75', '0.63', '0.58', '1.53', '1.52', '0.92', '1.42', '1.98', '1.92', '0.68', '0.90', '0.73', '1.56', '0.31', '0.67', '0.65', '0.77', '0.22']	0.846325
sp|Q0TGH3|YEEN_ECOL5	Q0TGH3	Probable transcriptional regulatory protein YeeN OS=Escherichia coli O6:K15:H31 (strain 536 / UPEC) GN=yeeN PE=3 SV=1	yeeN	0.956361	['0.84', '0.67', '0.45', '3.25', '1.33', '0.99', '0.49', '0.49', '0.42', '0.34', '0.38', '0.45', '0.35', '0.44', '0.58', '1.10', '1.21', '1.97']	0.696555	['0.85', '0.79', '0.59', '0.54', '0.80', '0.38', '0.39', '2.13', '0.40', '0.91', '0.09', '1.09', '2.23', '1.77', '1.57', '2.60', '1.41', '1.10', '0.79', '0.69', '0.62', '1.11', '0.81', '1.23']	0.84805	['0.83', '0.81', '2.38', '0.93', '0.65', '1.52', '0.77', '0.94', '0.36', '0.61', '0.57', '0.64', '0.48', '0.65', '0.47', '0.46', '0.59', '0.53', '0.54', '0.61', '0.51', '0.44', '0.80', '23.05']	0.77815	['0.87', '1.20', '0.44', '1.02', '1.87', '1.93', '1.69', '0.39', '1.97', '2.92', '1.45', '1.17', '2.40', '1.39', '1.14', '3.70', '6.78', '46.37']	1.8199
sp|B7UT45|YEEX_ECO27	B7UT45	UPF0265 protein YeeX OS=Escherichia coli O127:H6 (strain E2348/69 / EPEC) GN=yeeX PE=3 SV=1	yeeX	0.751036	['0.52', '0.74', '1.02', '0.75', '0.82', '1.34', '0.25', '0.43', '0.28', '0.30', '0.18', '0.10', '0.42', '0.22', '0.09', '1.00', '0.96', '0.59', '0.91', '0.81', '0.95', '0.58', '0.58', '0.66', '2.18', '1.58', '3.21']	0.580435	['0.82', '0.92', '1.55', '0.81', '1.12', '1.13', '1.30', '1.61', '1.14', '1.42', '1.79', '2.53', '0.67', '0.98', '1.08', '1.28', '0.76', '0.69', '0.71', '0.77', '0.82', '1.01', '0.94', '1.02', '0.77', '0.84', '0.82']	1.02559	['0.47', '0.48', '0.53', '0.73', '0.69', '0.77', '0.82', '0.65', '0.73', '0.66', '0.97', '0.67', '0.39', '1.12', '0.90', '0.22', '0.28', '0.23', '0.71', '0.64', '0.68', '0.91', '0.80', '0.83', '0.96', '0.86', '0.91', '0.97', '1.00', '1.05', '0.64', '0.52', '0.56', '0.52', '0.55', '0.61', '0.97', '0.98', '0.98', '0.94', '0.89', '0.91', '1.15', '0.97', '0.88']	0.704311	['0.67', '1.44', '1.31', '0.53', '6.70', '0.88', '0.80', '0.91', '0.69', '0.70', '2.19', '2.28', '0.44', '0.60', '0.56', '0.92', '0.79', '0.55', '0.29', '0.37', '0.74', '0.61', '0.59', '0.58', '0.67', '0.60', '0.55', '0.77', '0.51', '0.65', '0.71', '0.62', '0.65']	0.758839
sp|P76402|YEGP_ECOLI	P76402	UPF0339 protein YegP OS=Escherichia coli (strain K12) GN=yegP PE=1 SV=2	yegP	1.32254	['2.03', '2.10', '1.42', '1.31', '1.06', '1.32', '0.80', '1.61', '0.81', '2.59', '2.26', '1.29', '0.71', '1.78', '0.52']	1.31075	['1.76', '1.81', '1.76', '1.98', '2.01', '1.88', '1.74', '1.09', '2.03', '1.66', '1.83', '1.52', '1.60', '1.88', '1.67', '0.79', '0.85', '0.90', '0.47', '0.65', '0.21', '2.06', '1.04', '2.29', '1.29', '1.13', '1.14']	1.29941	['2.06', '2.09', '1.97', '1.44', '1.51', '1.57', '1.49', '0.94', '1.32', '1.64', '1.64', '1.37', '0.58', '1.03', '1.63', '1.94', '1.39', '1.78', '1.60', '1.49', '1.51', '3.64', '1.28', '5.28', '1.70', '0.06', '1.47']	1.41951	['2.25', '1.99', '1.93', '1.19', '1.06', '1.29', '1.23', '1.53', '1.67', '1.52', '2.49', '0.88', '0.74', '1.44', '0.87', '1.03', '0.98', '1.46', '0.75', '0.87', '1.09']	1.2654
sp|B7UFI8|EFPL_ECO27	B7UFI8	Elongation factor P-like protein OS=Escherichia coli O127:H6 (strain E2348/69 / EPEC) GN=yeiP PE=3 SV=1	yeiP	0.808122	['0.76', '0.67', '0.37', '0.65', '0.60', '0.95', '0.69', '0.56', '0.59', '0.86', '0.52', '0.45']	0.618849	['0.65', '0.36', '0.45', '0.35', '0.71', '0.63', '0.67', '0.75', '0.92', '0.83', '0.88', '1.81', '0.61', '0.91', '0.74', '1.32', '1.20', '1.18']	0.762581	['0.74', '0.55', '0.57', '0.94', '0.61', '0.15', '0.70', '0.83', '0.60', '1.29', '0.89', '0.74', '0.74', '0.50', '0.66', '1.22', '0.87', '0.73']	0.684808	['1.92', '2.28', '1.01', '1.26', '1.06', '0.88', '1.97', '1.77', '1.17', '0.62', '1.10', '1.04', '2.15', '3.46', '1.31', '1.61', '0.87', '0.74']	1.31968
sp|A7ZPA5|YFBR_ECO24	A7ZPA5	UPF0207 protein YfbR OS=Escherichia coli O139:H28 (strain E24377A / ETEC) GN=yfbR PE=3 SV=1	yfbR	0.776141			['1.06', '0.75', '0.69', '1.55', '1.56', '1.37']	1.10305	['0.21', '0.18', '0.21', '1.31', '1.30', '1.69']	0.535431	['1.00', '1.42', '1.14', '0.50', '0.57', '0.52']	0.791635
sp|P76569|YFGD_ECOLI	P76569	Uncharacterized protein YfgD OS=Escherichia coli (strain K12) GN=yfgD PE=1 SV=1	yfgD	0.750761	['0.63', '0.63', '1.26', '0.15', '0.21', '0.35', '0.40', '0.27', '0.51', '0.08', '0.51', '0.38', '0.75', '1.03', '0.60', '0.81', '0.90', '0.75', '0.81', '0.87', '0.86', '0.58', '0.59', '0.60']	0.517725	['1.06', '1.03', '1.71', '0.97', '3.12', '3.63', '2.47', '4.30', '6.02', '0.38', '0.36', '0.82', '1.84', '1.80', '1.45', '1.33', '1.45', '1.15', '0.97', '0.42', '0.52', '0.68', '0.70', '0.65', '0.84', '2.43', '2.29', '0.44', '0.45', '0.62', '3.06', '2.64', '2.53', '2.46', '2.25', '2.11', '1.01', '0.74', '0.79', '0.92', '0.59', '0.88', '0.49', '0.37', '0.41', '0.86', '0.88', '0.77']	1.11256	['0.25', '0.41', '0.53', '1.78', '0.85', '0.42', '0.51', '2.61', '0.98', '0.56', '0.62', '0.55', '0.46', '0.19', '0.53', '1.29', '0.76', '1.18', '1.10', '0.96', '0.85', '1.18', '0.99', '1.33', '0.25', '0.26', '0.29', '0.38', '0.34', '0.34', '0.46', '0.44', '0.44', '0.59', '0.62', '0.52', '1.23', '2.20', '1.14', '1.20', '1.07', '1.12', '0.90', '0.95', '0.97']	0.682035	['0.51', '0.56', '0.77', '0.46', '1.19', '0.62', '0.40', '0.47', '0.52', '1.99', '2.59', '3.29', '1.16', '0.95', '0.98', '1.04', '1.11', '1.06', '0.51', '0.70', '0.49', '0.38', '0.50', '0.41', '1.09', '1.28', '1.00']	0.808679
sp|P0ADE7|YGAU_ECOL6	P0ADE7	Uncharacterized protein YgaU OS=Escherichia coli O6:H1 (strain CFT073 / ATCC 700928 / UPEC) GN=ygaU PE=3 SV=2	ygaU	1.14532	['1.51', '1.38', '1.94', '2.32', '2.34', '0.72', '2.41', '1.47', '1.70', '1.06', '0.85', '1.00', '2.26', '1.97', '0.84', '2.35', '2.93', '2.11', '0.52', '0.45', '0.45', '0.54', '1.26', '8.48', '0.43', '0.36', '5.79', '3.62', '6.17', '1.45']	1.46002	['1.46', '1.22', '2.17', '0.43', '0.27', '1.42', '1.23', '1.15', '0.90', '0.89', '1.19', '5.99', '2.05', '0.55', '1.64', '1.19', '1.19', '1.15', '1.56', '1.60', '0.95', '1.59', '1.48', '1.48', '0.58', '0.83', '1.13', '4.28', '0.62', '0.99', '3.05', '1.55', '1.45', '0.91', '1.19', '0.92', '2.15', '0.79', '13.96', '1.12', '0.54', '6.78', '0.92', '0.74', '0.58', '0.31', '0.33', '0.24', '1.16', '1.14…	1.10345	['2.29', '1.77', '3.11', '0.52', '0.48', '0.82', '1.43', '1.73', '0.76', '1.78', '1.18', '1.73', '0.97', '0.82', '1.02', '0.75', '1.03', '0.60', '2.28', '2.02', '2.19', '1.05', '0.62', '1.69', '0.53', '0.53', '0.73', '0.44', '1.57', '1.03', '0.79', '0.48', '1.48', '0.64', '1.04', '2.68', '1.93', '1.92', '2.13', '0.61', '0.74', '0.29', '3.36', '4.42', '3.68', '1.05', '0.70', '0.83', '1.09', '1.26'…	1.09166	['3.79', '2.22', '1.87', '2.67', '1.29', '3.04', '0.46', '0.62', '67.07', '0.49', '0.79', '1.05', '1.45', '0.10', '1.82', '1.29', '0.69', '1.35', '0.98', '1.04', '1.02', '0.53', '0.47', '0.35', '0.67', '0.83', '0.69', '0.61', '0.80', '0.57', '1.27', '1.25', '1.40', '1.11', '0.55', '0.41', '1.44', '0.97', '0.97', '1.65', '1.96', '1.01', '0.55', '0.44', '0.65', '0.50', '1.29', '0.80', '1.40', '0.47…	0.978397
sp|A7ZR19|YGFB_ECO24	A7ZR19	UPF0149 protein YgfB OS=Escherichia coli O139:H28 (strain E24377A / ETEC) GN=ygfB PE=3 SV=1	ygfB	0.813334			['1.39', '1.12', '1.16', '0.50', '0.99', '0.29']	0.798308	['0.73', '0.38', '0.47', '1.04', '0.69', '0.86', '1.81', '1.72', '1.80']	0.917255	['0.81', '0.81', '0.79', '0.90', '0.47', '0.56', '0.81', '0.79', '0.79']	0.734762
sp|A7ZR88|FETP_ECO24	A7ZR88	Probable Fe(2+)-trafficking protein OS=Escherichia coli O139:H28 (strain E24377A / ETEC) GN=yggX PE=3 SV=1	yggX	1.01777	['0.71', '0.63', '0.66', '0.39', '0.97', '1.24', '0.58', '0.31', '0.62', '0.79', '0.51', '0.56', '0.35', '0.42', '0.36']	0.564129	['1.21', '1.19', '0.11', '0.81', '1.47', '0.46', '1.85', '1.82', '1.82', '1.38', '1.50', '1.65', '1.10', '1.07', '1.51', '1.05', '1.62', '1.17', '0.63', '1.83', '1.51', '1.44', '1.24', '1.11', '0.20', '0.51', '0.71', '0.55', '0.52', '0.24', '0.31', '1.71', '14.50', '1.64', '1.65', '1.58', '4.51', '3.11', '2.99', '2.60', '4.73', '3.54', '3.94', '3.94', '3.94', '2.01', '2.38', '2.21', '2.33', '2.79…	1.34524	['1.95', '1.97', '0.20', '1.47', '1.39', '1.38', '1.75', '1.16', '1.09', '1.36', '1.06', '0.81', '0.73', '1.09', '0.99', '1.51', '2.62', '1.38', '1.43', '1.46', '0.71', '0.92', '0.99', '1.20', '0.79', '0.83', '0.92', '1.02', '0.90', '1.00', '0.84', '0.81', '0.81', '1.19', '1.23', '1.19', '1.68', '1.31', '0.84', '2.09', '2.07', '6.97']	1.18318	['1.32', '1.61', '23.33', '1.49', '1.29', '1.06', '0.92', '1.01', '0.78', '2.23', '2.46', '1.73', '0.53', '0.22', '1.12', '0.91', '1.37', '1.15', '0.64', '0.99', '1.04', '1.47', '1.97', '2.27', '0.48', '0.43', '1.09']	1.195
sp|P0ADX3|YHFA_ECO57	P0ADX3	Protein yhfA OS=Escherichia coli O157:H7 GN=yhfA PE=4 SV=1	yhfA	0.661161			['0.08', '0.10', '0.14', '0.42', '0.96', '0.73', '1.74', '1.77', '1.17', '0.76', '0.40', '0.30']	0.465008	['0.83', '0.58', '0.52', '0.47', '0.30', '0.41']	0.493807	['0.88', '1.20', '4.56', '1.21', '0.63', '1.09']	1.25865
sp|P37613|YHHK_ECOLI	P37613	Uncharacterized protein yhhK OS=Escherichia coli (strain K12) GN=yhhK PE=1 SV=1	yhhK	1.02057	['0.48', '0.70', '0.83', '0.99', '0.77', '0.59']	0.708048	['1.22', '1.28', '2.01', '1.08', '1.19', '1.07', '1.26', '1.49', '1.40', '1.03', '1.15', '1.09', '1.24', '1.41', '1.03', '1.06', '1.27', '1.53', '3.69', '1.15', '1.64']	1.32699	['0.82', '1.49', '0.49', '1.62', '1.84', '10.44', '0.88', '0.76', '0.76', '0.72', '0.92', '1.27', '0.71', '0.57', '0.74', '0.41', '0.62', '0.48']	0.935801	['1.34', '0.95', '1.33', '0.74', '1.03', '2.74']	1.23384
sp|Q0TBK7|YIBT_ECOL5	Q0TBK7	Uncharacterized protein YibT OS=Escherichia coli O6:K15:H31 (strain 536 / UPEC) GN=yibT PE=4 SV=1	yibT	1.17488	['1.54', '2.49', '0.51', '1.20', '1.65', '1.21', '0.59', '0.44', '0.52', '0.75', '0.87', '0.72', '0.53', '1.68', '1.49', '0.68', '0.72', '0.66', '0.76', '0.57', '0.71']	0.857317	['1.76', '2.60', '0.80', '2.07', '3.37', '1.57', '1.02', '0.95', '0.95', '1.63', '1.50', '1.64', '1.66', '1.33', '1.73', '1.51', '1.37', '1.55', '1.01', '2.02', '1.45', '1.99', '1.87', '1.79', '1.53', '1.22', '1.36']	1.52728	['1.07', '0.84', '1.05', '0.93', '0.97', '1.30', '1.47', '1.88', '1.78', '1.26', '1.27', '1.27', '1.47', '1.78', '1.27', '0.98', '0.95', '0.94', '1.06', '1.01', '1.02']	1.18526	['2.14', '1.11', '0.94', '1.37', '0.69', '1.03', '1.86', '1.47', '1.45', '1.40', '0.67', '1.30', '1.16', '1.18', '2.83', '1.33', '1.01', '1.12', '1.38', '0.85', '1.04']	1.22774
sp|P0ADN3|YIFE_ECOL6	P0ADN3	UPF0438 protein YifE OS=Escherichia coli O6:H1 (strain CFT073 / ATCC 700928 / UPEC) GN=yifE PE=3 SV=2	yifE	0.835383	['0.85', '0.85', '0.81', '0.11', '0.08', '0.10', '0.22', '0.26', '0.15', '0.99', '0.42', '0.35', '0.43', '0.41', '0.69', '0.46', '0.40', '0.34', '0.23', '0.18', '0.17', '0.41', '0.32', '0.43', '0.90', '0.69', '0.54', '0.49', '0.70', '0.59', '0.78', '0.75', '0.77', '0.60', '0.66', '0.68', '0.59', '0.61', '0.76', '0.31', '0.53', '0.57', '0.35', '0.41', '0.43', '0.15', '0.29', '0.63']	0.419744	['0.79', '0.79', '0.75', '0.49', '1.12', '0.68', '0.52', '0.54', '0.50', '0.99', '0.67', '0.56', '0.88', '1.01', '1.40', '0.94', '0.92', '0.94', '4.45', '1.50', '3.13', '0.99', '0.66', '0.87', '1.56', '0.87', '1.36', '0.87', '1.01', '0.81', '0.90', '0.62', '0.98', '0.32', '0.46', '0.39', '0.70', '1.59', '0.63', '2.14', '1.74', '1.47', '1.47', '1.43', '1.04', '1.03', '1.11', '1.08', '1.78', '1.50'…	1.01229	['2.18', '1.13', '1.15', '0.77', '0.80', '0.77', '0.88', '0.93', '0.98', '1.09', '1.23', '1.10', '2.25', '1.08', '0.74', '1.01', '0.97', '1.02', '0.82', '0.71', '1.03', '0.95', '0.78', '1.04', '1.30', '0.97', '0.34', '1.32', '0.77', '0.67', '0.61', '0.66', '0.51', '0.44', '0.84', '0.87', '1.20', '1.40', '2.03', '0.71', '0.69', '0.56', '0.89', '0.93', '0.87', '0.98', '0.99', '0.67', '0.84', '0.87'…	0.877294	['1.30', '1.25', '1.30', '0.75', '0.92', '1.46', '1.60', '1.38', '1.38', '1.07', '0.68', '0.98', '0.74', '0.92', '0.85', '4.35', '1.01', '0.64', '0.74', '1.43', '1.88', '1.82', '1.37', '4.66', '20.16', '1.70', '7.88', '0.61', '0.68', '0.64', '0.74', '0.56', '0.92', '1.57', '1.04', '2.32', '0.76', '1.04', '0.93', '3.72', '1.08', '1.40']	1.3065
sp|P68207|YJBJ_ECO57	P68207	UPF0337 protein YjbJ OS=Escherichia coli O157:H7 GN=yjbJ PE=3 SV=1	yjbJ	1.33016	['2.33', '2.23', '1.31', '2.72', '1.60', '0.77', '2.26', '0.80', '1.11', '1.66', '1.57', '2.20', '3.08', '2.72', '2.71', '0.88', '1.16', '0.33']	1.52611	['1.95', '1.99', '1.90', '1.80', '1.81', '1.19', '1.36', '0.67', '0.91', '2.20', '1.33', '1.75', '2.64', '2.78', '2.83', '2.09', '2.15', '2.09']	1.74996	['0.27', '0.88', '0.93', '0.62', '0.04', '0.06', '0.11', '0.21', '0.28', '2.42', '2.48', '1.93', '1.65', '1.68', '1.16', '2.47', '1.79', '1.25', '2.14', '2.16', '2.08', '1.90', '1.79', '1.77', '0.60', '1.29', '0.91', '0.61', '0.49', '0.42']	0.81611	['1.35', '1.26', '1.37', '2.48', '2.81', '2.84', '1.10', '1.13', '1.10', '1.47', '0.45', '0.37', '1.24', '1.17', '1.19', '2.19', '0.92', '1.57', '2.47', '3.65', '2.67']	1.43634
sp|P0AF51|YJBR_ECO57	P0AF51	Uncharacterized protein YjbR OS=Escherichia coli O157:H7 GN=yjbR PE=4 SV=1	yjbR	1.18817	['1.49', '1.00', '1.16', '1.87', '1.79', '1.52', '1.30', '1.22', '1.13', '1.52', '1.37', '1.13', '1.28', '0.54', '0.55', '1.02', '0.65', '0.61']	1.10134	['0.95', '1.74', '1.00', '1.68', '0.85', '1.15', '2.08', '2.05', '1.94', '1.86', '2.02', '2.11', '1.73', '1.69', '1.03', '2.16', '2.01', '2.25', '2.58', '1.72', '1.14', '3.88', '0.87', '0.88', '1.62', '1.01', '0.99']	1.54551	['1.63', '1.53', '1.15', '0.72', '0.99', '0.74', '2.65', '2.67', '2.65', '0.91', '1.10', '1.14', '1.94', '1.85', '2.68', '1.32', '1.33', '1.25', '2.34', '2.24', '2.16', '0.36', '0.31', '0.49', '0.38', '0.38', '0.40', '0.40', '0.43', '0.31', '0.43', '0.44', '0.54']	0.939761	['1.12', '1.32', '0.41', '1.63', '2.05', '2.26', '1.37', '1.37', '0.98', '1.46', '0.91', '0.93', '1.23', '0.77', '2.74']	1.24598
sp|P0AF60|YJDI_ECO57	P0AF60	Uncharacterized protein YjdI OS=Escherichia coli O157:H7 GN=yjdI PE=4 SV=1	yjdI	1.22716	['1.14', '1.02', '1.59']	1.22956	['1.54', '1.49', '1.42', '0.68', '1.20', '1.00', '1.46', '1.32', '1.36', '1.04', '0.20', '0.61']	0.992119	['1.15', '1.08', '1.10', '0.98', '0.89', '0.68', '1.27', '1.11', '1.34', '0.22', '0.18', '0.68', '0.99', '0.96', '0.98']	0.804681	['1.40', '2.63', '3.35']	2.31031
sp|P39274|YJDJ_ECOLI	P39274	Uncharacterized protein yjdJ OS=Escherichia coli (strain K12) GN=yjdJ PE=4 SV=1	yjdJ	1.44891			['1.65', '2.25', '1.63']	1.82264	['2.10', '0.98', '0.74']	1.15182
sp|P0A9W4|YJJK_ECO57	P0A9W4	Uncharacterized ABC transporter ATP-binding protein YjjK OS=Escherichia coli O157:H7 GN=yjjK PE=3 SV=2	yjjK	0.883387	['0.52', '0.44', '0.43', '0.62', '0.36', '0.51', '4.16', '2.04', '2.88', '0.75', '0.72', '0.74', '1.03', '1.17', '1.22', '0.71', '0.85', '0.72', '0.90', '0.87', '0.85', '0.31', '0.16', '0.26', '0.76', '0.55', '0.16', '1.35', '1.28', '1.36', '1.06', '0.79', '0.85', '0.57', '0.58', '0.49', '0.50', '0.54', '0.68', '2.53', '0.51', '0.60', '1.29', '2.75', '35.41', '1.47', '1.40', '1.08', '0.22', '0.44…	0.803566	['0.39', '0.80', '0.95', '0.76', '0.78', '0.70', '0.57', '0.51', '0.96', '0.73', '1.30', '1.61', '0.37', '0.52', '0.52', '2.86', '0.79', '3.50', '1.76', '1.74', '1.95', '1.75', '0.87', '1.06', '0.89', '1.00', '0.67', '1.09', '2.06', '1.42', '1.71', '1.12', '0.51', '0.61', '0.62', '0.43', '2.32', '1.04', '1.47', '0.95', '0.79', '1.15', '0.59', '0.80', '0.30', '0.56', '0.38', '0.32', '0.98', '0.40'…	0.852798	['3.28', '2.26', '1.51', '0.48', '0.53', '0.45', '3.94', '0.71', '2.28', '0.54', '0.32', '0.43', '0.29', '0.28', '0.27', '0.56', '0.60', '0.51', '0.31', '0.42', '0.49', '0.61', '0.57', '0.54', '0.68', '0.58', '0.69', '1.66', '1.95', '0.89', '0.70', '0.51', '1.15', '1.32', '1.16', '1.06', '2.05', '1.31', '1.30', '3.73', '1.32', '0.74', '3.71', '1.69', '2.42', '0.34', '0.50', '0.48', '7.41', '8.60'…	0.880404	['1.24', '0.92', '0.90', '1.79', '1.64', '0.99', '1.19', '1.42', '1.27', '0.98', '1.03', '1.03', '0.85', '0.83', '0.91', '0.65', '0.66', '0.65', '0.42', '0.43', '0.54', '2.20', '1.81', '1.78', '1.09', '0.80', '0.88', '0.72', '0.90', '0.70', '1.51', '0.91', '1.23', '2.25', '1.16', '1.42', '0.43', '2.37', '3.17', '1.71', '1.81', '1.16', '1.57', '1.43', '1.19', '0.19', '0.20', '1.33', '1.04', '0.25'…	1.00938
sp|Q46868|YQIC_ECOLI	Q46868	Uncharacterized protein YqiC OS=Escherichia coli (strain K12) GN=yqiC PE=1 SV=2	yqiC	0.926353	['0.65', '1.07', '1.11', '2.30', '2.41', '1.38', '0.23', '0.14', '0.25']	0.713818	['0.91', '0.92', '0.94', '1.72', '1.96', '0.91', '1.31', '1.69', '0.81', '0.72', '1.34', '1.03', '0.56', '0.78', '8.32', '0.67', '0.71', '0.57', '0.74', '1.15', '0.89']	1.05652	['1.71', '2.35', '3.38', '0.52', '1.49', '3.65', '1.37', '1.19', '0.78', '0.70', '0.57', '1.08', '0.60', '0.65', '2.27']	1.21441	['0.81', '1.21', '1.31', '0.52', '0.37', '1.40', '0.63', '1.10', '0.97', '0.53', '0.62', '0.95']	0.804032
sp|P0AB78|BIKB_ECO57	P0AB78	Putative 8-amino-7-oxononanoate synthase/2-amino-3-ketobutyrate coenzyme A ligase OS=Escherichia coli O157:H7 GN=Z5044 PE=3 SV=1	Z5044	0.789039	['0.51', '0.54', '0.70', '0.71', '0.66', '0.67', '0.44', '0.45', '0.57', '0.38', '0.60', '0.53', '0.51', '0.84', '0.42', '1.10', '1.04', '0.94', '0.64', '0.71', '0.64', '0.56', '0.44', '0.50', '0.85', '0.90', '1.09', '0.58', '0.66', '1.20', '0.73', '0.96', '0.70', '0.88', '0.72', '0.60', '0.59', '0.55', '0.74', '0.44', '0.37', '0.33', '0.61', '0.67', '0.34', '0.05', '0.39', '0.23', '0.64', '0.81'…	0.588475	['0.74', '0.75', '1.37', '4.38', '3.55', '2.67', '0.55', '1.60', '2.51', '0.49', '1.11', '1.14', '0.97', '0.61', '0.94', '1.81', '2.21', '2.29', '0.97', '0.95', '0.89', '0.74', '1.56', '0.88', '0.63', '0.23', '1.34', '1.03', '1.09', '1.07', '2.14', '1.64', '0.86', '0.90', '0.82', '0.99', '0.95', '0.65', '1.64', '0.79', '1.06', '1.42', '0.37', '0.47', '0.35', '0.59', '0.54', '0.64', '0.55', '0.39'…	0.81768	['0.53', '0.71', '0.90', '0.70', '1.49', '1.84', '0.88', '0.84', '0.77', '0.22', '0.19', '0.67', '1.49', '1.23', '0.61', '1.06', '0.52', '0.56', '0.43', '1.02', '0.55', '0.50', '0.84', '0.44', '0.33', '0.47', '0.97', '0.49', '0.47', '0.51', '0.34', '0.29', '0.24', '0.30', '1.19', '0.67', '1.66', '0.76', '0.57', '0.62', '0.84', '0.79', '7.22', '265.65', '6.37', '1.29', '1.38', '1.34', '1.71', '0.9…	0.759908	['1.35', '0.75', '1.05', '1.06', '0.85', '0.88', '1.02', '0.93', '1.34', '2.11', '2.02', '1.73', '0.65', '0.78', '0.72', '0.94', '0.47', '0.38', '0.64', '0.76', '0.59', '2.11', '0.98', '3.91', '1.20', '1.09', '1.16', '0.75', '0.85', '3.37', '1.18', '1.31', '1.57', '1.08', '0.72', '2.61', '1.08', '0.15', '0.68', '1.07', '0.66', '1.09', '0.86', '1.19', '1.28', '1.56', '1.61', '1.35', '3.55', '2.26'…	1.06004
sp|B7UNP8|ZAPB_ECO27	B7UNP8	Cell division protein ZapB OS=Escherichia coli O127:H6 (strain E2348/69 / EPEC) GN=zapB PE=3 SV=1	zapB	0.68182	['0.36', '0.37', '0.38', '0.61', '0.61', '0.61', '0.50', '0.49', '0.50', '0.28', '0.26', '0.26', '0.42', '0.43', '0.44', '0.66', '0.50', '0.33', '0.22', '0.06', '0.15', '0.32', '0.32', '0.33']	0.354311	['0.72', '0.70', '0.80', '1.33', '1.34', '1.30', '0.92', '1.30', '1.40', '0.85', '0.86', '0.85', '0.62', '0.64', '0.64', '2.97', '1.11', '1.89', '0.57', '0.51', '0.61', '0.51', '0.55', '0.53']	0.875107	['0.58', '0.63', '1.93', '0.35', '0.47', '0.40', '0.44', '0.50', '0.38', '0.53', '0.67', '0.58', '0.57', '0.61', '0.60', '1.28', '0.51', '0.61', '0.56', '0.92', '1.32', '1.08', '1.08', '0.79']	0.656967	['1.00', '0.86', '1.58', '0.81', '0.79', '0.80', '1.11', '1.09', '1.37', '1.12', '1.03', '1.48', '0.87', '0.89', '0.89', '0.51', '0.64', '0.50', '2.21', '6.92', '1.58', '0.61', '1.31', '0.95']	1.06094
sp|P0AC54|G6PD_ECOL6	P0AC54	Glucose-6-phosphate 1-dehydrogenase OS=Escherichia coli O6:H1 (strain CFT073 / ATCC 700928 / UPEC) GN=zwf PE=3 SV=1	zwf	0.839733	['0.74', '0.55', '0.36', '0.64', '0.64', '0.58', '0.79', '0.94', '0.73', '0.61', '0.71', '0.96', '0.47', '0.55', '0.39', '0.97', '0.90', '0.92', '0.33', '0.34', '0.25', '0.69', '0.91', '1.13', '0.72', '0.64', '1.09', '0.57', '0.50', '0.38', '0.78', '0.80', '6.03', '0.89', '3.78', '0.81', '0.53', '0.48', '0.61', '0.83', '0.61', '0.53']	0.699149	['0.91', '0.81', '0.81', '0.71', '0.82', '0.39', '0.78', '0.67', '0.80', '0.88', '1.34', '0.84', '0.76', '1.62', '0.83', '0.58', '0.43', '0.69', '2.78', '0.51', '0.94', '1.31', '2.06', '1.77', '1.58', '6.19', '1.55', '0.79', '0.76', '1.10', '1.51', '1.36', '1.32', '0.51', '0.14', '0.70', '0.39', '0.48', '0.95', '1.53', '1.13', '1.75', '0.73', '0.89', '0.92', '0.97', '0.98', '1.29', '0.73', '0.66'…	0.903363	['1.50', '0.59', '0.63', '0.15', '0.10', '0.23', '0.38', '0.40', '0.46', '0.63', '0.55', '0.52', '0.82', '1.21', '0.72', '1.51', '1.71', '3.08', '0.82', '0.78', '0.75', '0.66', '0.62', '0.83', '1.05', '0.85', '1.66', '2.40', '1.06', '1.01', '0.60', '1.07', '0.88', '0.59', '0.71', '0.65', '1.45', '0.14', '0.25', '1.20', '0.80', '0.44', '0.95', '0.85', '1.15']	0.715657	['1.64', '1.67', '1.44', '1.27', '1.59', '1.71', '0.71', '0.77', '1.15', '0.91', '1.12', '0.99', '0.88', '0.90', '0.81', '3.27', '0.48', '2.03', '2.40', '2.69', '2.48', '1.59', '1.61', '1.23', '1.18', '1.05', '0.97', '1.07', '1.33', '1.08', '0.80', '0.84', '0.91', '1.06', '1.11', '0.88', '1.08', '1.25', '0.95', '0.68', '0.73', '0.79', '1.02', '1.06', '0.96', '0.58', '0.55', '1.24', '0.43', '0.46'…	1.10009
sp|P0AGK6|YHBY_ECO57	P0AGK6	RNA-binding protein YhbY OS=Escherichia coli O157:H7 GN=yhbY PE=4 SV=1	yhbY	0.90925	['0.57']	0.574124	['3.72', '0.89', '0.80', '1.08']	1.29921	['0.52', '0.57', '0.79', '0.80']	0.655914	['1.40']	1.39701
sp|P63285|CLPB_ECO57	P63285	Chaperone protein ClpB OS=Escherichia coli O157:H7 GN=clpB PE=3 SV=1	clpB	0.560872	['0.27', '0.30', '0.17', '0.17', '0.22', '0.27', '0.25', '0.48', '0.40', '0.23', '0.86', '0.60', '0.54', '2.07', '0.30', '0.78', '0.54', '0.51', '0.43', '0.56', '0.54', '0.45', '0.47', '0.32', '1.05', '0.53', '0.72', '0.38', '0.87', '0.99', '0.35', '0.39', '0.68', '0.69', '0.33', '0.45', '0.54', '0.45', '0.40', '0.08', '0.64', '0.48', '0.50', '0.36', '0.30', '0.50', '0.36', '1.32', '0.69', '0.10'…	0.510553	['0.24', '0.38', '0.24', '0.24', '1.13', '0.13', '0.55', '0.19', '0.21', '0.42', '2.62', '1.25', '0.44', '0.35', '0.47', '0.50', '0.25', '0.23', '0.30', '0.44', '0.71', '0.59', '0.25', '1.11', '0.76', '0.88', '0.49', '0.71', '0.44', '0.33', '0.40', '0.40', '0.34', '0.85', '0.36', '0.31', '0.22', '0.29', '0.79', '0.95', '0.47', '0.80', '0.99', '0.38', '0.56', '0.43', '2.40', '2.28', '1.54', '0.67'…	0.512685	['0.60', '0.26', '0.82', '0.88', '0.69', '0.82', '0.48', '0.54', '3.46', '0.54', '0.50', '0.72', '1.71', '0.98', '0.71', '0.27', '0.47', '0.52', '0.41', '0.28', '0.48', '0.38', '0.34', '0.35', '0.38', '0.55', '0.36', '0.77', '0.85', '0.68', '1.35', '0.48', '0.46', '1.47', '0.26', '0.31', '0.96', '1.27', '0.06', '0.40', '0.44', '0.30', '0.46', '10.18', '0.53', '0.39', '0.84', '0.59', '0.70', '0.46…	0.570759	['1.27', '0.51', '0.76', '0.55', '1.27', '1.11', '0.60', '0.65', '0.62', '0.84', '4.28', '4.61', '0.85', '0.73', '0.67', '0.71', '0.45', '0.17', '0.73', '0.36', '0.44', '0.97', '0.51', '0.37', '0.68', '0.65', '0.47', '0.45', '0.73', '0.83', '0.52', '0.32', '0.49', '0.54', '0.37', '0.30', '1.39', '0.73', '1.64', '1.59', '0.66', '0.54', '3.54', '0.60', '2.82', '1.03', '0.92', '0.39', '0.83', '1.43'…	0.662384
sp|Q8X8J3|RLUC_ECO57	Q8X8J3	Ribosomal large subunit pseudouridine synthase C OS=Escherichia coli O157:H7 GN=rluC PE=3 SV=1	rluC	0.826275			['0.48', '0.72']	0.589658	['1.04', '0.47']	0.703584	['1.03', '0.56', '3.12', '1.90']	1.35975
sp|P09053|AVTA_ECOLI	P09053	Valine--pyruvate aminotransferase OS=Escherichia coli (strain K12) GN=avtA PE=1 SV=3	avtA	1.10608					['0.86']	0.860655	['1.41', '1.43']	1.42148
