# Supplementary material for: Structural, Kinetic and Proteomic Characterization of Acetyl Phosphate-Dependent Bacterial Protein Acetylation
Source: PLoS One. 2014 Apr 22;9(4):e94816. doi: 10.1371/journal.pone.0094816 (PMC3995681; doi:10.1371/journal.pone.0094816)
Supplement: Table S24 — Pathway enrichment analysis of 292 acetyllysines upregulated in the ackA mutant relative to its WT parent, as determined by DAVID Ontology: Gene Ontology [GOTERM_BP_FAT (DAVID)] analysis. (XLSX) [file pone.0094816.s034.xlsx]

## Sheet: S24_GO_BPFAT
Table S24. Pathway enrichment analysis of 292 proteins with upregulated acetyllysines in the ackA mutant: Gene Ontology
DAVID analysis
GO a	Term	Count b	% c	P Value d	Fold Enrichment d	Bonferroni d
GO:0006412	translation	57	17.1687	2.8269e-47	13.5413	1.4813e-44
GO:0006091	generation of precursor metabolites and energy	49	14.759	4.47978e-16	3.94787	2.32703e-13
GO:0009165	nucleotide biosynthetic process	28	8.43373	2.80386e-14	6.47277	1.47184e-11
GO:0034404	nucleobase, nucleoside and nucleotide biosynthetic process	30	9.03614	2.2558e-13	5.46403	1.18213e-10
GO:0006007	glucose catabolic process	22	6.62651	2.99543e-12	7.26536	1.56958e-09
GO:0019320	hexose catabolic process	22	6.62651	3.70691e-12	7.18639	1.94243e-09
GO:0046365	monosaccharide catabolic process	22	6.62651	2.98505e-11	6.45022	1.56417e-08
GO:0006006	glucose metabolic process	28	8.43373	3.54119e-11	4.79465	1.85558e-08
GO:0006096	glycolysis	17	5.12048	4.20396e-11	9.20517	2.20287e-08
GO:0032268	regulation of cellular protein metabolic process	11	3.31325	1.2311e-10	19.4455	6.45096e-08
GO:0006417	regulation of translation	11	3.31325	1.2311e-10	19.4455	6.45096e-08
GO:0046164	alcohol catabolic process	22	6.62651	1.34291e-10	5.95628	7.03684e-08
GO:0044275	cellular carbohydrate catabolic process	22	6.62651	3.05008e-10	5.69955	1.59824e-07
GO:0010608	posttranscriptional regulation of gene expression	11	3.31325	1.57827e-09	15.3755	8.27012e-07
GO:0015949	nucleobase, nucleoside and nucleotide interconversion	12	3.61446	4.27727e-09	11.8238	2.24129e-06
GO:0019318	hexose metabolic process	28	8.43373	7.36148e-09	3.76492	3.85741e-06
GO:0009061	anaerobic respiration	17	5.12048	9.24475e-09	6.42625	4.84424e-06
GO:0006732	coenzyme metabolic process	28	8.43373	1.92852e-08	3.59598	1.01054e-05
GO:0015980	energy derivation by oxidation of organic compounds	26	7.83133	3.30422e-08	3.73855	1.7314e-05
GO:0006164	purine nucleotide biosynthetic process	16	4.81928	5.93644e-08	6.08651	3.11065e-05
GO:0045333	cellular respiration	24	7.22892	6.20509e-08	3.88815	3.25141e-05
GO:0016052	carbohydrate catabolic process	31	9.33735	1.65422e-07	2.99555	8.66772e-05
GO:0006351	transcription, DNA-dependent	10	3.01205	4.34633e-07	10.3628	0.000227722
GO:0043038	amino acid activation	11	3.31325	7.0147e-07	8.36896	0.000367503
GO:0043039	tRNA aminoacylation	11	3.31325	7.0147e-07	8.36896	0.000367503
GO:0006418	tRNA aminoacylation for protein translation	11	3.31325	7.0147e-07	8.36896	0.000367503
GO:0005996	monosaccharide metabolic process	30	9.03614	7.46156e-07	2.85305	0.00039091
GO:0009260	ribonucleotide biosynthetic process	14	4.21687	7.57004e-07	5.88434	0.000396592
GO:0032774	RNA biosynthetic process	11	3.31325	7.9009e-07	8.26434	0.000413922
GO:0009259	ribonucleotide metabolic process	14	4.21687	8.87541e-07	5.80318	0.000464964
GO:0006353	transcription termination	5	1.50602	1.08016e-06	50.0869	0.000565846
GO:0006084	acetyl-CoA metabolic process	12	3.61446	1.33785e-06	6.86906	0.000700787
GO:0006090	pyruvate metabolic process	9	2.71084	2.06266e-06	10.4027	0.00108025
GO:0051186	cofactor metabolic process	30	9.03614	3.59383e-06	2.63615	0.0018814
GO:0046394	carboxylic acid biosynthetic process	30	9.03614	3.69969e-06	2.63231	0.00193676
GO:0016053	organic acid biosynthetic process	30	9.03614	4.03146e-06	2.62083	0.00211026
GO:0009152	purine ribonucleotide biosynthetic process	12	3.61446	6.36082e-06	5.86384	0.00332753
GO:0009150	purine ribonucleotide metabolic process	12	3.61446	7.43317e-06	5.77001	0.00388742
GO:0006541	glutamine metabolic process	9	2.71084	8.03075e-06	8.72482	0.00419929
GO:0045454	cell redox homeostasis	12	3.61446	1.08296e-05	5.54809	0.00565867
GO:0046356	acetyl-CoA catabolic process	10	3.01205	1.13753e-05	7.0711	0.00594296
GO:0006099	tricarboxylic acid cycle	10	3.01205	1.13753e-05	7.0711	0.00594296
GO:0009060	aerobic respiration	12	3.61446	1.44486e-05	5.38248	0.00754252
Footnotes:
a: Gene Ontology: GOTERM_ BP_FAT (DAVID), a total of 332 DAVID IDs was read in
b: Number of DAVID ID's matching the specific GOTERM
c: % of count matching a specific GO category over total number of DAVID ID's entered for analysis (332)
d: the E. coli proteome was used as background
