# Supplementary material for: Structural, Kinetic and Proteomic Characterization of Acetyl Phosphate-Dependent Bacterial Protein Acetylation
Source: PLoS One. 2014 Apr 22;9(4):e94816. doi: 10.1371/journal.pone.0094816 (PMC3995681; doi:10.1371/journal.pone.0094816)
Supplement: Table S26 — Frequency table for in vivo sequence logo. Amino acid frequencies relative to the acetylated lysine were analyzed. 541 sites that exhibited significantly upregulated sites in the ackA mutant relative to WT with a p-value<0.05 were analyzed. Acetylated lysines that were within 10 amino acids of the start (28 sites) or stop codon (24 sites) were not part of this analysis. (XLSX) [file pone.0094816.s036.xlsx]

## Sheet: S26_Frequency Table in vivo
Table S26. Frequency table for in vivo sequence logo generated from 541 ackA-sensitive lysines.
		Amino acid position relative to acetylated lysine (position = 0)
	-10		-9		-8		-7		-6		-5		-4		-3		-2		-1		0	1		2		3		4		5		6		7		8		9		10
Amino acid composition	A	0.118299	A	0.101664	A	0.116451	A	0.121996	L	0.101664	A	0.116451	A	0.114603	A	0.118299	L	0.142329	D	0.144177		L	0.142329	A	0.118299	A	0.114603	E	0.101664	A	0.0961183	V	0.103512	K	0.090573	A	0.10536	A	0.0961183	A	0.101664
	L	0.0998152	G	0.0942699	K	0.0924214	E	0.0924214	A	0.0979667	L	0.0794824	E	0.0887246	E	0.090573	A	0.0961183	E	0.144177		D	0.0924214	L	0.0979667	K	0.0979667	L	0.0979667	G	0.090573	L	0.0868762	L	0.090573	K	0.0998152	L	0.0961183	L	0.0831793
	G	0.0813309	V	0.090573	G	0.0887246	G	0.0887246	V	0.0850277	K	0.077634	G	0.0887246	D	0.0850277	I	0.0850277	L	0.0998152		A	0.0850277	I	0.0887246	E	0.0850277	A	0.0887246	V	0.090573	A	0.0813309	E	0.0887246	G	0.0887246	V	0.0868762	G	0.0813309
	R	0.0794824	K	0.0757856	E	0.0720887	V	0.0868762	K	0.0720887	V	0.0739372	V	0.0813309	V	0.0794824	G	0.0813309	A	0.0868762		E	0.0850277	E	0.0868762	G	0.077634	V	0.0794824	L	0.0887246	K	0.0813309	A	0.0831793	L	0.0831793	G	0.0831793	E	0.077634
	V	0.0757856	L	0.0702403	L	0.0683919	R	0.0794824	G	0.0702403	G	0.0720887	K	0.0739372	G	0.077634	D	0.0794824	G	0.0665434		V	0.0794824	G	0.0831793	V	0.077634	K	0.0720887	E	0.0831793	E	0.0757856	G	0.0739372	V	0.0813309	K	0.077634	D	0.0665434
	I	0.0683919	T	0.0665434	V	0.0665434	L	0.0739372	E	0.0609982	I	0.0702403	L	0.0683919	L	0.0757856	E	0.0757856	V	0.0554529		G	0.0609982	V	0.0757856	D	0.0683919	D	0.0683919	K	0.077634	G	0.0720887	V	0.0702403	R	0.0739372	E	0.0757856	V	0.0665434
	D	0.0628466	E	0.0591497	R	0.0591497	I	0.0720887	I	0.0609982	D	0.0609982	R	0.0665434	T	0.0591497	V	0.0591497	S	0.0499076		K	0.0480591	T	0.0665434	L	0.0683919	R	0.064695	R	0.0739372	I	0.0683919	D	0.0628466	T	0.0628466	I	0.0609982	I	0.0591497
	E	0.0554529	R	0.0536044	I	0.0554529	K	0.064695	R	0.0573013	E	0.0609982	I	0.0554529	I	0.0536044	P	0.0480591	I	0.0462107		R	0.0480591	D	0.0573013	R	0.0665434	I	0.0628466	I	0.0554529	D	0.051756	R	0.0628466	E	0.0609982	S	0.0573013	K	0.0591497
	K	0.051756	D	0.051756	S	0.0554529	D	0.0573013	D	0.0554529	T	0.0591497	N	0.0554529	K	0.0499076	S	0.0462107	Q	0.0462107		P	0.0462107	R	0.0499076	N	0.0573013	G	0.0609982	T	0.0480591	S	0.0499076	I	0.0554529	I	0.0609982	R	0.0499076	T	0.0536044
	T	0.0462107	S	0.051756	D	0.0462107	Q	0.0425139	P	0.0554529	R	0.0573013	P	0.051756	R	0.0462107	N	0.0425139	N	0.0443623		I	0.0443623	K	0.0406654	T	0.0499076	S	0.0536044	D	0.0443623	F	0.0480591	T	0.0536044	D	0.0480591	D	0.0480591	F	0.051756
	S	0.0443623	I	0.0462107	P	0.0462107	T	0.0369686	S	0.0480591	S	0.0536044	D	0.0499076	F	0.0425139	Q	0.0406654	T	0.0425139		N	0.0443623	P	0.0351201	P	0.0443623	Q	0.0499076	P	0.0443623	R	0.0480591	N	0.0462107	S	0.0443623	T	0.0480591	R	0.0499076
	P	0.0425139	N	0.0462107	Q	0.0443623	N	0.0332717	T	0.0462107	P	0.0443623	T	0.038817	S	0.0406654	F	0.0369686	P	0.0351201		Y	0.0425139	F	0.0332717	S	0.0443623	T	0.0480591	Q	0.0406654	T	0.0480591	S	0.0406654	N	0.038817	N	0.0443623	S	0.0499076
	Q	0.0369686	P	0.0443623	T	0.0425139	S	0.0314233	N	0.0406654	N	0.0369686	Q	0.0332717	Q	0.038817	Y	0.0351201	F	0.0332717		T	0.0369686	N	0.0332717	I	0.0425139	N	0.0406654	S	0.0369686	N	0.038817	P	0.038817	F	0.0314233	P	0.0443623	P	0.0406654
	N	0.0314233	Q	0.038817	F	0.0351201	F	0.0295749	Q	0.0369686	Q	0.0351201	Y	0.0332717	Y	0.038817	T	0.0295749	K	0.0240296		F	0.0351201	Q	0.0332717	Q	0.0425139	F	0.0314233	N	0.0351201	Q	0.038817	F	0.0314233	Q	0.0295749	Q	0.0351201	N	0.038817
	Y	0.0314233	F	0.0351201	Y	0.0351201	P	0.0295749	F	0.0314233	F	0.0277264	F	0.025878	N	0.0351201	K	0.0277264	Y	0.0203327		Q	0.0332717	S	0.0332717	F	0.0166359	P	0.0277264	F	0.025878	P	0.0295749	Q	0.0314233	Y	0.025878	F	0.0277264	Q	0.0314233
	F	0.0240296	Y	0.0277264	N	0.025878	Y	0.0203327	Y	0.0314233	M	0.0203327	S	0.0221811	P	0.0351201	M	0.0240296	M	0.0147874		S	0.025878	Y	0.0221811	M	0.0166359	Y	0.0184843	Y	0.0240296	Y	0.025878	Y	0.0295749	H	0.0221811	Y	0.0277264	M	0.0277264
	M	0.0240296	M	0.0166359	H	0.0203327	M	0.0166359	M	0.0166359	Y	0.0203327	M	0.0184843	M	0.0147874	R	0.0184843	C	0.012939		M	0.0203327	H	0.0166359	Y	0.0166359	H	0.012939	H	0.0166359	M	0.0203327	M	0.0240296	P	0.0184843	M	0.0184843	Y	0.0203327
	H	0.0184843	H	0.0147874	M	0.0203327	H	0.0147874	H	0.0147874	C	0.0184843	H	0.0147874	H	0.00739372	C	0.0110906	H	0.012939		H	0.0147874	M	0.0166359	H	0.00924214	M	0.00924214	M	0.0166359	C	0.0147874	H	0.00924214	M	0.0110906	W	0.0110906	H	0.0166359
	C	0.00739372	W	0.0110906	C	0.00554529	W	0.00554529	W	0.0147874	H	0.00739372	C	0.0110906	W	0.00739372	H	0.0110906	R	0.012939		C	0.00924214	W	0.00924214	W	0.00369686	W	0.00739372	C	0.00924214	H	0.012939	W	0.00924214	C	0.00924214	H	0.00739372	W	0.0166359
	W	0	C	0.00369686	W	0.00369686	C	0.00184843	C	0.00184843	W	0.00739372	W	0.00739372	C	0.00369686	W	0.00924214	W	0.00739372		W	0.00554529	C	0.00184843	C	0	C	0.00369686	W	0.00184843	W	0.00369686	C	0.00739372	W	0.00369686	C	0.00369686	C	0.00739372
Amino acid frequencies relative to the acetylated lysine were analyzed. 541 sites that exhibited significantly upregulated sites in the ackA mutant relative to WT with a P value < 0.05 were analyzed. Acetylated lysines that were within 10 amino acids of the start (28 sites) or stop codon (24 sites) were not part of this analysis.
