# Supplementary material for: Structural, Kinetic and Proteomic Characterization of Acetyl Phosphate-Dependent Bacterial Protein Acetylation
Source: PLoS One. 2014 Apr 22;9(4):e94816. doi: 10.1371/journal.pone.0094816 (PMC3995681; doi:10.1371/journal.pone.0094816)
Supplement: Table S32 — MS1 Filtering and quantification of acetylysine sites following in vitro incubation of purified RNAP with 10 mM acP. (XLSX) [file pone.0094816.s042.xlsx]

## Sheet: S32_RNAP_10 mM AcP
Table S32: MS1 Filtering and Quantification of in vitro incubation of subunits of recombinant RNAP with 10 mM AcP monitoring acetyllysine sites.
	2 incubation replicates and 2 technical replicates were quantitated
	time course of 0, 10 min (10 mM AcP)
RNAP, 10mM AcP		ratio	P value
		10/0 mM	10/0 mM
RpoA
B1	K-297	4.86	0.0094
B2	K-297	4.81	0.0095
log average B1, B2	K-297	4.83
CV (B1, B2)	K-297	0.005
RpoB
B1	K-1065	13.6408	0.000231916
B2	K-1065	16.1468	0.00289267
log average B1, B2	K-1065	14.841
CV (B1, B2)	K-1065	0.0442122
RpoD
B1	K-493	5.68907	0.0319047
B2	K-493	3.89524	0.0293082
log average B1, B2	K-493	4.70747
CV (B1, B2)	K-493	0.172899
RpoD
B1	K-593	5.81903	0.0380484
B2	K-593	7.73528	0.0121499
log average B1, B2	K-593	6.70909
CV (B1, B2)	K-593	0.105746
weaker reproducibility between incubation replicates B1 and B2 for the following site:
RpoA
B1	K-298	2.51	0.00656229
B2	K-298	8.98	0.00857038
log average B1, B2	K-298	4.75
CV (B1, B2)	K-298	0.5774
